# Supplementary material for: Metal-free, photoredox-catalyzed aromatization-driven deconstructive functionalization of spiro-dihydroquinazolinones with α-CF3 alkenes
Source: Royal Society of Chemistry journal article supplement (doi:10.1039/d4cc02868f), 2024-01-01

## Supporting Information

# **Metal-free, photoredox-catalyzed aromatization-driven deconstructive functionalization of *spiro-* dihydroquinazolinones with $\alpha$ -CF<sub>3</sub> alkenes**

Jin-Hua Zhang,<sup>†a</sup> Hong-Jie Miao,<sup>†a</sup> Jia-Yi Li,<sup>a</sup> Wenke Li,<sup>a</sup> Pengchen Ma,<sup>\*a</sup> Xin-Hua Duan  
and Li-Na Guo<sup>\*a</sup>

<sup>a</sup>Department of Chemistry, School of Chemistry, Engineering Research Center of Energy Storage Materials and Devices, Ministry of Education, Xi'an Jiaotong University, Xi'an 710049, China.

E-mail: guoln81@xjtu.edu.cn; mapengchen@xjtu.edu.cn

<sup>†</sup> These authors contributed equally to this work.

## Table of Contents

|                                                                                                                               |     |
|-------------------------------------------------------------------------------------------------------------------------------|-----|
| 1 General Information .....                                                                                                   | S3  |
| 2 Starting Materials .....                                                                                                    | S4  |
| 2.1 General Procedure (GP) for the Synthesis of <i>spiro</i> -Dihydroquinazolinones .....                                     | S4  |
| 2.2 Characterization of Starting Materials.....                                                                               | S5  |
| 3. Detailed Optimization of Reaction Conditions .....                                                                         | S10 |
| 3.1 GP for the Reaction of <i>spiro</i> -Dihydroquinazolinone <b>1a</b> with $\alpha$ -CF <sub>3</sub> Alkene <b>2a</b> ..... | S10 |
| 3.2 Optimization of the <i>gem</i> -Difluoroallylation of <b>1a</b> with $\alpha$ -CF <sub>3</sub> Alkene <b>2a</b> .....     | S11 |
| 3.3 Optimization of the CF <sub>3</sub> -Retained Alkylation <b>1a</b> with $\alpha$ -CF <sub>3</sub> Alkene <b>2b</b> .....  | S15 |
| 4. General Procedure for the Synthesis of <b>3</b> , <b>4</b> and <b>5</b> .....                                              | S18 |
| 5. Scale-up Reaction .....                                                                                                    | S20 |
| 6 Derivatizations of the Product <b>3a</b> .....                                                                              | S21 |
| 6.1 Synthesis of the Compound <b>6a</b> .....                                                                                 | S21 |
| 6.2 Synthesis of the Compound <b>6b</b> .....                                                                                 | S21 |
| 6.3 Synthesis of the Compound <b>6c</b> .....                                                                                 | S22 |
| 6.4 Synthesis of the Compound <b>6d</b> .....                                                                                 | S22 |
| 7. Two-Step Telescoping Procedure for the Formation of <b>3a</b> .....                                                        | S23 |
| 8 Mechanistic Investigation.....                                                                                              | S23 |
| 8.1 TEMPO-Trapping Experiment .....                                                                                           | S23 |
| 8.2 BHT-Inhibiting Experiment .....                                                                                           | S24 |
| 8.3 Radical Clock Experiment.....                                                                                             | S25 |
| 8.4 Stern-Volmer Fluorescence Quenching Experiments .....                                                                     | S26 |
| 8.5 Light On-Off Experiments .....                                                                                            | S26 |
| 8.6 Proposed Mechanism.....                                                                                                   | S28 |
| 9. References .....                                                                                                           | S29 |
| 10. Characterization Date of Products.....                                                                                    | S30 |
| 11. <sup>1</sup> H NMR, <sup>13</sup> C NMR and <sup>19</sup> F NMR Spectra of Products.....                                  | S53 |

## 1 General Information

The reactions were conducted in oven-dried Schlenk-tube. And the photoinduced reactions were carried out in oven-dried Schlenk-tube with Watecs blue LEDs Irradiation Parallel Reactor. Unless otherwise stated, all reagents were purchased from commercial sources and used without further purification.  $^1\text{H}$ ,  $^{13}\text{C}$  and  $^{19}\text{F}$  NMR spectra were recorded on a Bruker 400 MHz (100 MHz for  $^{13}\text{C}$  NMR, 376 MHz for  $^{19}\text{F}$  NMR) spectrometer at ambient temperature. Chemical shift are reported in ppm from TMS with the solvent resonance as internal standard ( $\text{CDCl}_3$ :  $^1\text{H}$  NMR:  $\delta = 7.26$ ;  $^{13}\text{C}$  NMR:  $\delta = 77.0$ ;  $\text{DMSO}-d_6$ :  $^1\text{H}$  NMR:  $\delta = 2.50$ ;  $^{13}\text{C}$  NMR:  $\delta = 39.5$ ). Coupling constants are reported in Hz with multiplicities denoted as s (singlet), d (doublet), t (triplet), q (quartet), dd (doublet of doublets), td (triplet of doublets) and m (multiplet). FT-IR spectra were recorded on a Bruker V 70 spectrometer and only major peaks are reported in  $\text{cm}^{-1}$ . HRMS were obtained on a WATERS I-Class VION IMS Q-ToF. Melting points were measured using open glass capillaries in a SGW® X-4A apparatus. Analytical TLC: aluminum backed plates pre-coated (0.25 mm) with Merck Silica Gel 60F-254. Compounds were visualized by exposure to UV-light.

## 2 Starting Materials

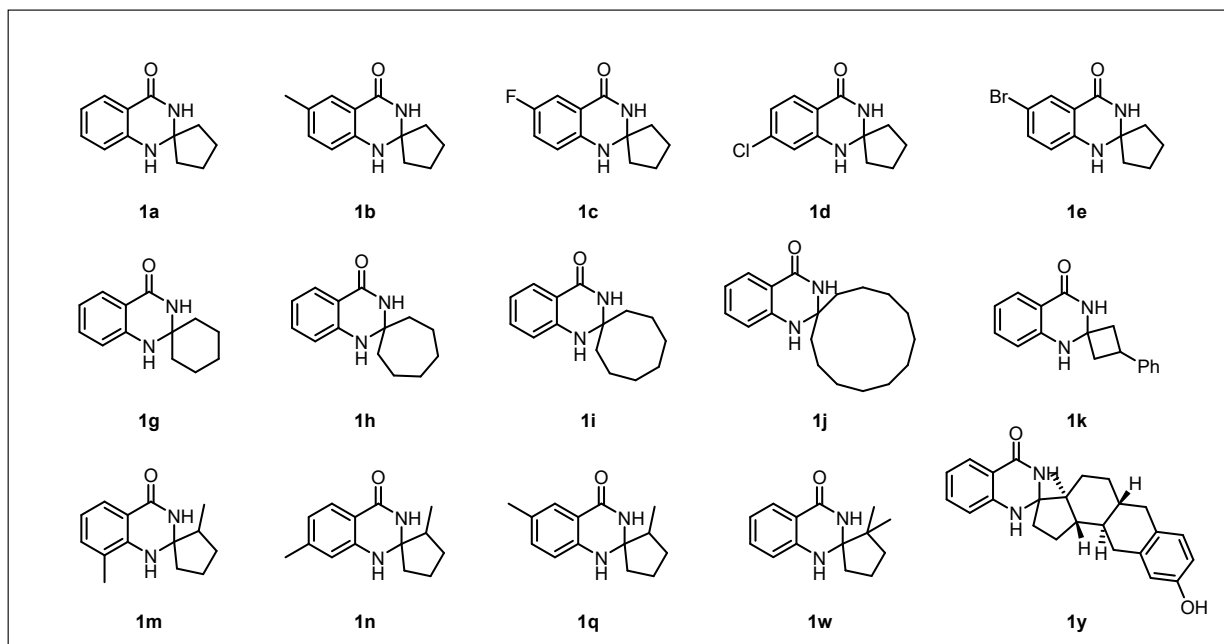

### 2.1 General Procedure for the Synthesis of *spiro-Dihydroquinazolinones*<sup>1</sup>

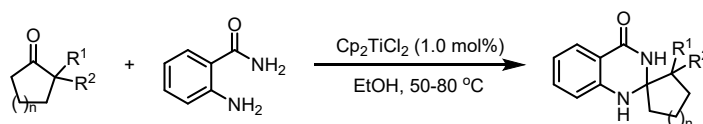

Dihydroquinazolinones were prepared according to the literature. A 50 mL oven-dried round bottom flask equipped with a magnetic stirrer was charged with 2-aminobenzamide (10 mmol, 1.0 equiv.), corresponding cyclic ketone (11 mmol, 1.1 equiv.) and  $\text{Cp}_2\text{TiCl}_2$  (1.0 mol%) were dissolved in 10 mL EtOH in one portion under air. The reaction mixture was stirred at 50-80 °C until the reaction was completed as indicated by TLC. The reaction was cooled to 20 °C generating precipitate that was collected as crude product by suction filtration. The crude material was washed with water and purified by recrystallization (EtOH) to give desired product.



## 2.2 Characterization of Starting Materials

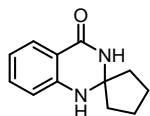

**1'H-Spiro[cyclopentane-1,2'-quinazolin]-4'(3'H)-one (1a):** White solid; m.p.: 251-252 °C;  $R_f = 0.2$  (EtOAc/petroleum ether = 1:2);  $^1\text{H NMR}$  (400 MHz, DMSO- $d_6$ ):  $\delta = 8.08$  (s, 1H), 7.57 (d,  $J = 7.2$  Hz, 1H), 7.23-7.19 (m, 1H), 6.73-6.68 (m, 2H), 6.64-6.61 (m, 1H), 1.82-1.77 (m, 4H), 1.69-1.64 (m, 4H);  $^{13}\text{C NMR}$  (100 MHz, DMSO- $d_6$ ):  $\delta = 163.4, 147.5, 133.0, 127.2, 116.5, 114.6, 114.3, 77.0, 39.3, 22.0$  ppm; HRMS (ESI) calcd for  $\text{C}_{12}\text{H}_{15}\text{N}_2\text{O}$   $[\text{M}+\text{H}]^+$  203.1180, found 203.1188.

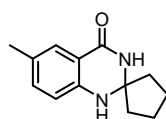

**6'-Methyl-1'H-spiro[cyclopentane-1,2'-quinazolin]-4'(3'H)-one (1b):** White solid; m.p.: 228-229 °C;  $R_f = 0.2$  (EtOAc/petroleum ether = 1:2);  $^1\text{H NMR}$  (400 MHz, DMSO- $d_6$ ):  $\delta = 8.07$  (s, 1H), 7.40-7.39 (m, 1H), 7.04 (dd,  $J = 8.4, 2.0$  Hz, 1H), 6.62 (d,  $J = 8.0$  Hz, 1H), 6.54 (s, 1H), 2.17 (s, 3H), 1.81-1.75 (m, 4H), 1.68-1.62 (m, 4H);  $^{13}\text{C NMR}$  (100 MHz, DMSO- $d_6$ ):  $\delta = 163.6, 145.4, 133.8, 127.1, 125.1, 114.7, 114.5, 77.1, 39.1, 22.0, 20.1$  ppm; HRMS (ESI) calcd for  $\text{C}_{13}\text{H}_{17}\text{N}_2\text{O}$   $[\text{M}+\text{H}]^+$  217.1335, found 217.1348.

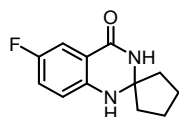

**6'-Fluoro-1'H-spiro[cyclopentane-1,2'-quinazolin]-4'(3'H)-one (1c):** White solid; m.p.: 231-232 °C;  $R_f = 0.2$  (EtOAc/petroleum ether = 1:2);  $^1\text{H NMR}$  (400 MHz, DMSO- $d_6$ ):  $\delta = 8.28$  (s, 1H), 7.28 (dd,  $J = 9.2, 2.8$  Hz, 1H), 7.15-7.08 (m, 1H), 6.79-6.71 (m, 2H), 1.85-1.76 (m, 4H), 1.72-1.62 (m, 4H);  $^{13}\text{C NMR}$  (100 MHz, DMSO- $d_6$ ):  $\delta = 162.6, 154.4$  (d,  $J = 231.2$  Hz), 144.2, 120.5 (d,  $J = 23.3$  Hz), 116.0 (d,  $J = 6.9$  Hz), 115.3 (d,  $J = 6.6$  Hz), 112.4 (d,  $J = 22.7$  Hz), 77.2, 39.7, 22.0 ppm; HRMS (ESI) calcd for  $\text{C}_{12}\text{H}_{14}\text{FN}_2\text{O}$   $[\text{M}+\text{H}]^+$  221.1085, found 221.1098.

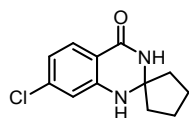

**7'-Chloro-1'H-spiro[cyclopentane-1,2'-quinazolin]-4'(3'H)-one (1d):** White solid; m.p.: 246 -247 °C;  $R_f = 0.2$  (EtOAc/petroleum ether = 1:2);  $^1\text{H NMR}$  (400 MHz, DMSO- $d_6$ ):  $\delta = 8.23$  (s, 1H), 7.56 (d,  $J = 8.0$  Hz, 1H), 7.05 (s, 1H), 6.73 (d,  $J = 2.0$  Hz, 1H), 6.64 (dd,  $J = 8.0, 1.6$  Hz, 1H), 1.82-1.75 (m, 4H), 1.69-1.63 (m, 4H);  $^{13}\text{C NMR}$  (100 MHz, DMSO- $d_6$ ):  $\delta = 162.7, 148.6,$

137.7, 129.4, 116.6, 113.5, 113.4, 77.4, 39.5, 22.0 ppm; HRMS (ESI) calcd for C<sub>12</sub>H<sub>14</sub>ClN<sub>2</sub>O [M+H]<sup>+</sup> 237.0789, found 237.0803.

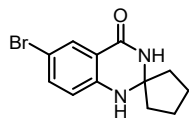

**6'-Bromo-1'H-spiro[cyclopentane-1,2'-quinazolin]-4'(3'H)-one (1e):** White solid; m.p.: 229-230 °C; R<sub>f</sub> = 0.2 (EtOAc/petroleum ether = 1:2); <sup>1</sup>H NMR (400 MHz, DMSO-*d*<sub>6</sub>): δ = 8.28 (s, 1H), 7.63 (s, 1H), 7.34 (d, *J* = 8.4 Hz, 1H), 7.01 (s, 1H), 6.68 (d, *J* = 8.4 Hz, 1H), 1.83-1.76 (m, 4H), 1.70-1.61 (m, 4H); <sup>13</sup>C NMR (100 MHz, DMSO-*d*<sub>6</sub>): δ = 162.3, 146.6, 135.5, 129.4, 116.8, 116.3, 107.5, 77.2, 39.4, 22.1 ppm; HRMS (ESI) calcd for C<sub>12</sub>H<sub>14</sub>BrN<sub>2</sub>O [M+H]<sup>+</sup> 281.0284, found 281.0291.

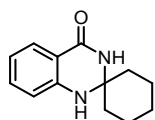

**1'H-Spiro[cyclohexane-1,2'-quinazolin]-4'(3'H)-one (1g):** White solid; m.p.: 228-229 °C; R<sub>f</sub> = 0.2 (EtOAc/petroleum ether = 1:2); <sup>1</sup>H NMR (400 MHz, DMSO-*d*<sub>6</sub>): δ = 7.90 (s, 1H), 7.56 (d, *J* = 7.6 Hz, 1H), 7.23-7.19 (m, 1H), 6.80 (d, *J* = 8.4 Hz, 1H), 6.63-6.58 (m, 2H), 1.78-1.71 (m, 2H), 1.64-1.52 (m, 6H), 1.47-1.38 (m, 1H), 1.30-1.21 (m, 1H); <sup>13</sup>C NMR (100 MHz, DMSO-*d*<sub>6</sub>): δ = 163.2, 146.8, 133.2, 127.2, 116.5, 114.6, 114.5, 67.9, 37.2, 24.7, 20.9 ppm; HRMS (ESI) calcd for C<sub>13</sub>H<sub>17</sub>N<sub>2</sub>O [M+H]<sup>+</sup> 217.1335, found 217.1348.

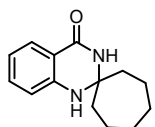

**1'H-Spiro[cycloheptane-1,2'-quinazolin]-4'(3'H)-one (1h):** White solid; m.p.: 215-216 °C; R<sub>f</sub> = 0.2 (EtOAc/petroleum ether = 1:2); <sup>1</sup>H NMR (400 MHz, DMSO-*d*<sub>6</sub>): δ = 8.03 (s, 1H), 7.55 (d, *J* = 7.6 Hz, 1H), 7.22-7.18 (m, 1H), 6.72-6.70 (m, 2H), 6.61-6.58 (m, 1H), 1.91-1.83 (m, 4H), 1.58-1.47 (m, 8H); <sup>13</sup>C NMR (100 MHz, DMSO-*d*<sub>6</sub>): δ = 163.1, 146.9, 133.2, 127.2, 116.4, 114.4, 114.3, 72.0, 41.1, 29.4, 21.0 ppm; HRMS (ESI) calcd for C<sub>14</sub>H<sub>19</sub>N<sub>2</sub>O [M+H]<sup>+</sup> 231.1492, found 231.1503.

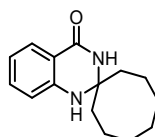

**1'H-spiro[cyclooctane-1,2'-quinazolin]-4'(3'H)-one (1i):** White solid; m.p.: 192-193 °C; R<sub>f</sub> = 0.2 (EtOAc/petroleum ether = 1:2); <sup>1</sup>H NMR (400 MHz, DMSO-*d*<sub>6</sub>): δ = 7.96 (s, 1H), 7.54 (d, *J* = 6.4 Hz, 1H), 7.22-7.17 (m, 1H), 6.73 (d, *J* = 8.4 Hz, 1H), 6.62-6.57 (m, 2H), 1.93-1.82 (m, 4H), 1.57-1.48 (m, 10H); <sup>13</sup>C NMR (100 MHz, DMSO-*d*<sub>6</sub>): δ = 163.0, 146.8, 133.1, 127.0,

116.2, 114.32, 114.26, 71.3, 35.6, 27.7, 24.1, 20.7 ppm; HRMS (ESI) calcd for C<sub>15</sub>H<sub>21</sub>N<sub>2</sub>O [M+H]<sup>+</sup> 245.1648, found 245.1659.

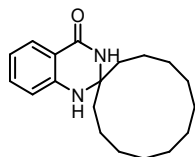

**1'H-spiro[cyclododecane-1,2'-quinazolin]-4'(3'H)-one (1j):** White solid; m.p.: 197-198 °C; R<sub>f</sub> = 0.2 (EtOAc/petroleum ether = 1:2); <sup>1</sup>H NMR (400 MHz, DMSO-*d*<sub>6</sub>): δ = 7.81 (s, 1H), 7.56 (d, *J* = 7.6 Hz, 1H), 7.22-7.18 (m, 1H), 6.75 (d, *J* = 8.4 Hz, 1H), 6.63-6.60 (m, 1H), 6.38 (s, 1H), 1.78-1.71 (m, 2H), 1.64-1.57 (m, 2H), 1.37-1.25 (m, 18H); <sup>13</sup>C NMR (100 MHz, DMSO-*d*<sub>6</sub>): δ = 163.1, 147.1, 133.2, 127.1, 116.6, 114.8, 114.7, 71.4, 34.1, 25.8, 25.5, 22.3, 21.9, 18.9 ppm; HRMS (ESI) calcd for C<sub>19</sub>H<sub>29</sub>N<sub>2</sub>O [M+H]<sup>+</sup> 301.2274, found 301.2286.

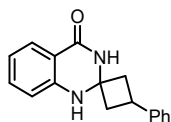

**3-Phenyl-1'H-spiro[cyclobutane-1,2'-quinazolin]-4'(3'H)-one (1k):** White solid; m.p.: 249-250 °C; R<sub>f</sub> = 0.2 (EtOAc/petroleum ether = 1:2, dr = 1:2.3); <sup>1</sup>H NMR (400 MHz, DMSO-*d*<sub>6</sub>): δ = 8.57 (s, 0.3H), 8.22 (s, 0.7 H), 7.40-7.35 (m, 1H), 7.22-7.17 (m, 1H), 7.10-7.01(m, 5H), 6.96-6.91 (m, 1H), 6.61-6.56 (m, 1H), 6.49-6.42 (m, 1H), 3.30-3.24 (m, 1H), 2.45-2.39 (m, 1H), 2.26-2.07 (m, 3H); <sup>13</sup>C NMR (100 MHz, DMSO-*d*<sub>6</sub>): δ = 163.6, 163.0, 147.3, 146.8, 144.6, 144.5, 133.42, 133.40, 128.39, 128.35, 127.3, 126.9, 126.8, 126.7, 126.2, 126.1, 117.2, 117.1, 114.9, 114.71, 114.66, 114.5, 66.6, 66.5, 45.9, 45.7, 30.5, 29.4 ppm; HRMS (ESI) calcd for C<sub>17</sub>H<sub>17</sub>N<sub>2</sub>O [M+H]<sup>+</sup> 265.1335, found 265.1344.

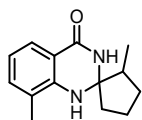

**2,8'-Dimethyl-1'H-spiro[cyclopentane-1,2'-quinazolin]-4'(3'H)-one (1m):** White solid; m.p.: 169-170 °C; R<sub>f</sub> = 0.2 (EtOAc/petroleum ether = 1:2, dr = 1:1.5); <sup>1</sup>H NMR (400 MHz, DMSO-*d*<sub>6</sub>): δ = 8.07 (s, 0.4H), 7.91 (s, 0.6H), 7.48-7.45 (m, 1H), 7.10-1.06 (m, 1H), 6.57-6.50 (m, 1H), 5.68 (s, 0.6H), 5.40 (s, 0.4H), 2.13-2.09 (m, 3H), 2.03-1.41 (m, 7H), 0.86 (d, *J* = 6.8 Hz, 1.8H), 0.75 (d, *J* = 6.8 Hz, 1.2H); <sup>13</sup>C NMR (100 MHz, DMSO-*d*<sub>6</sub>): δ = 163.9, 163.6, 145.9, 145.3, 133.8, 124.9, 121.8, 121.6, 116.3, 115.9, 115.0, 114.0, 78.4, 78.1, 44.9, 44.1, 38.3, 29.7, 29.3, 19.3, 19.0, 17.10, 17.08, 14.4, 14.0 ppm; HRMS (ESI) calcd for C<sub>14</sub>H<sub>19</sub>N<sub>2</sub>O [M+H]<sup>+</sup> 231.1492, found 231.1503.

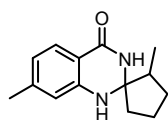

**2,7'-Dimethyl-1'H-spiro[cyclopentane-1,2'-quinazolin]-4'(3'H)-one (1n):** White solid;

m.p.: 171-172 °C;  $R_f = 0.2$  (EtOAc/petroleum ether = 1:2, dr = 1:1);  $^1\text{H NMR}$  (400 MHz, DMSO- $d_6$ ):  $\delta = 7.84$  (s, 0.5H), 7.83 (s, 0.5H), 7.43 (d,  $J = 8.0$  Hz, 1H), 6.56-6.51 (m, 1H), 6.45-6.42 (m, 1H), 6.41-6.37 (m, 1H), 2.18 (s, 3H), 1.97-1.84 (m, 2H), 1.79-1.55 (m, 4H), 1.48-1.38 (m, 1H), 0.88-0.84 (m, 3H);  $^{13}\text{C NMR}$  (100 MHz, DMSO- $d_6$ ):  $\delta = 163.9, 163.8, 148.1, 147.8, 143.14, 143.11, 127.3, 127.2, 117.6, 117.4, 114.1, 113.9, 111.83, 111.78, 78.5, 78.3, 44.4, 44.1, 39.6, 39.5, 29.4, 29.2, 21.6, 21.5, 19.0, 14.4, 13.9$  ppm; HRMS (ESI) calcd for  $\text{C}_{14}\text{H}_{19}\text{N}_2\text{O}$   $[\text{M}+\text{H}]^+$  231.1492, found 231.1504.

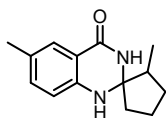

**2,6'-Dimethyl-1'H-spiro[cyclopentane-1,2'-quinazolin]-4'(3'H)-one (1q):** White solid; m.p.: 228-229 °C;  $R_f = 0.2$  (EtOAc/petroleum ether = 1:2, dr = 1:1);  $^1\text{H NMR}$  (400 MHz, DMSO- $d_6$ ):  $\delta = 7.87$  (s, 0.5H), 7.85 (s, 0.5H), 7.36 (s, 1H), 7.01 (d,  $J = 8.0$  Hz, 1H), 6.69-6.56 (m, 1H), 6.41-6.30 (m, 1H), 2.15 (s, 3H), 1.99-1.86 (m, 2H), 1.76-1.52 (m, 4H), 1.46-1.38 (m, 1H), 0.89-0.84 (m, 3H);  $^{13}\text{C NMR}$  (100 MHz, DMSO- $d_6$ ):  $\delta = 163.9, 163.8, 145.9, 145.6, 134.02, 133.98, 127.1, 127.0, 124.7, 124.5, 114.13, 114.06, 114.0, 78.5, 78.2, 44.2, 44.0, 39.3, 29.5, 29.2, 20.2, 19.04, 19.00, 14.5, 13.9$  ppm; HRMS (ESI) calcd for  $\text{C}_{14}\text{H}_{19}\text{N}_2\text{O}$   $[\text{M}+\text{H}]^+$  231.1492, found 231.1503.

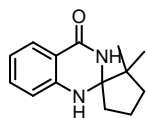

**2,2-Dimethyl-1'H-spiro[cyclopentane-1,2'-quinazolin]-4'(3'H)-one (1w):** White solid; m.p.: 149-150 °C;  $R_f = 0.2$  (EtOAc/petroleum ether = 1:2);  $^1\text{H NMR}$  (400 MHz,  $\text{CDCl}_3$ ):  $\delta = 7.84$  (dd,  $J = 8.0, 1.6$  Hz, 1H), 7.29-7.24 (m, 1H), 6.99 (s, 1H), 6.77-6.73 (m, 1H), 6.64 (d,  $J = 7.6$  Hz, 1H), 4.44 (s, 1H), 2.20-2.13 (m, 1H), 2.08-2.01 (m, 1H), 1.82-1.61 (m, 4H), 1.03 (s, 3H), 1.02 (s, 3H);  $^{13}\text{C NMR}$  (100 MHz,  $\text{CDCl}_3$ ):  $\delta = 164.7, 146.6, 133.8, 127.9, 117.8, 114.2, 113.6, 80.5, 46.6, 38.5, 36.5, 23.4, 23.1, 17.0$  ppm; HRMS (ESI) calcd for  $\text{C}_{14}\text{H}_{19}\text{N}_2\text{O}$   $[\text{M}+\text{H}]^+$  231.1492, found 231.1495.

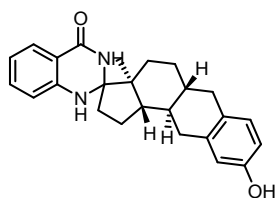

**(3aS,5aR,11aR,11bS)-9-Hydroxy-3a-methyl-1,2,3a,4,5,5a,6,11,11a,11b-decahydro-1'H-spiro[cyclopenta[a]anthracene-3,2'-quinazolin]-4'(3'H)-one (1y):** White solid; m.p.: 203-204 °C;  $R_f = 0.2$  (EtOAc/petroleum ether = 1:1);  $^1\text{H NMR}$  (400 MHz, DMSO- $d_6$ ):  $\delta = 9.00$ -8.98 (m, 1H), 8.34 (s, 1H), 7.55-7.51 (m, 1H), 7.19-7.14 (m, 1H), 6.95-6.90 (m, 1H), 6.74-6.69 (m,

2H), 6.60-6.54 (m, 1H), 6.50-6.40 (m, 2H), 4.41-4.37 (m, 1H), 2.75-2.64 (m, 2H), 2.06-2.03 (m, 1H), 1.99-1.92 (m, 2H), 1.84-1.78 (m, 1H), 1.73-1.66 (m, 1H), 1.55-1.43 (m, 1H), 1.28-1.22 (m, 2H), 1.17-1.12 (m, 2H), 1.08-1.02 (m, 2H), 0.78-0.75 (s, 3H);  $^{13}\text{C}$  NMR (100 MHz, DMSO- $d_6$ ):  $\delta$  = 164.0, 155.1, 147.6, 137.2, 133.1, 130.2, 127.0, 126.1, 116.2, 115.2, 115.0, 113.4, 112.8, 79.8, 56.2, 50.8, 46.6, 43.2, 37.4, 33.2, 29.3, 27.3, 26.1, 22.2, 18.7, 14.9 ppm; HRMS (ESI) calcd for  $\text{C}_{25}\text{H}_{29}\text{N}_2\text{O}_2$   $[\text{M}+\text{H}]^+$  389.2224, found 389.2230.

### 3. Detailed Optimization of Reaction Conditions

#### 3.1 General Procedure for the Reaction of *spiro*-Dihydroquinazolinone

##### 1a with $\alpha$ -CF<sub>3</sub> Alkene 2a

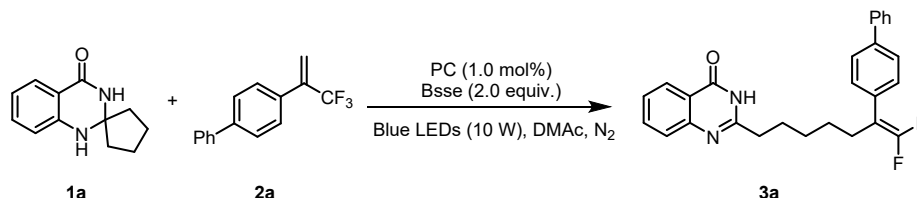

A 10 mL oven-dried Schlenk-tube equipped with a magnetic stirrer was charged with *spiro*-dihydroquinazolinone **1a** (0.24 mmol, 1.2 equiv.),  $\alpha$ -CF<sub>3</sub> alkene **2a** (0.20 mmol, 1.0 equiv.), photocatalyst (1.0 mol%), base (0.4 mmol, 2.0 equiv.). Then, the tube was evacuated and backfilled with nitrogen (three times). Subsequently, solvent (2.0 mL) was added by a syringe. The reaction mixture was stirred under the irradiation of a 10 W blue LED ( $\lambda = 460$ – $470$  nm; distance app. 1.0 cm from the bulb) for a specified time. After that, the resulting mixture was quenched with H<sub>2</sub>O and extracted with EtOAc (3 x 10 mL). The combined organic phase was washed with brine (10 mL), dried over Na<sub>2</sub>SO<sub>4</sub>, and concentrated in vacuo. Purification of the crude product by flash chromatography on silica gel (petroleum ether/EtOAc: 5:1 to 3:1) furnishes the desired product **3a** as white solid.

## 3.2 Optimization of the *gem*-Difluoroallylation of **1a** with $\alpha$ -CF<sub>3</sub>

### Alkene **2a**

Base<sup>a</sup>

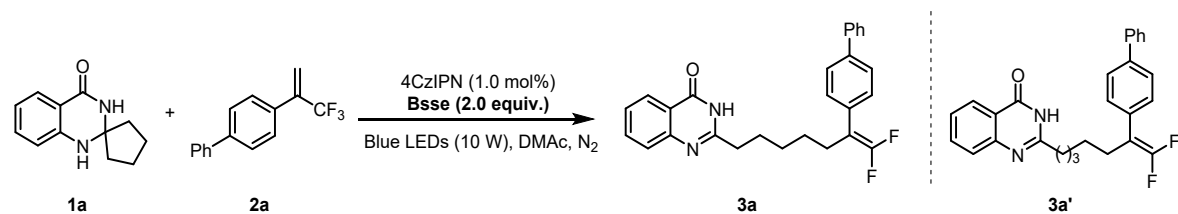

| Entry    | Base                            | Yield of <b>3a</b> (%) <sup>a</sup> |
|----------|---------------------------------|-------------------------------------|
| 1        | K <sub>3</sub> PO <sub>4</sub>  | 72                                  |
| 2        | K <sub>2</sub> CO <sub>3</sub>  | 73                                  |
| <b>3</b> | <b>NaHCO<sub>3</sub></b>        | <b>74</b>                           |
| 4        | Na <sub>2</sub> CO <sub>3</sub> | 70                                  |
| 5        | TMG                             | 71(14) <sup>b</sup>                 |
| 6        | TEA                             | Trace                               |
| 7        | DBU                             | 25                                  |
| 8        | Pyridine                        | 50                                  |
| 9        | 2,4,6-Collidine                 | 67                                  |
| 10       | No Base                         | 30                                  |

<sup>a</sup>Reaction conditions: **1a** (0.24 mmol, 1.2 equiv.), **2a** (0.20 mmol, 1.0 equiv.), 4CzIPN (1.0 mol%), Base (2.0 equiv.), DMAc (2.0 mL), irradiation with 10 W Blue LEDs at room temperature, under N<sub>2</sub>, for 18 h. Yields of isolated.

<sup>b</sup>NMR yield of **3a'** was given in parentheses.

Amount of Base<sup>a</sup>

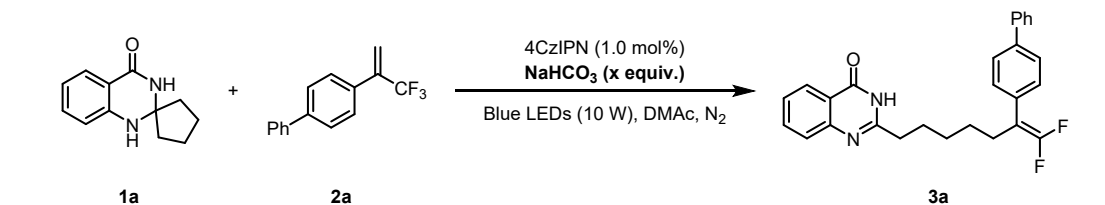

| Entry    | NaHCO <sub>3</sub> (x equiv.) | Yield of <b>3a</b> (%) <sup>a</sup> |
|----------|-------------------------------|-------------------------------------|
| 1        | 1.0                           | 41                                  |
| 2        | 1.5                           | 66                                  |
| <b>3</b> | <b>2.0</b>                    | <b>74</b>                           |
| 4        | 2.5                           | 62                                  |

<sup>a</sup>Reaction conditions: **1a** (0.24 mmol, 1.2 equiv.), **2a** (0.20 mmol, 1.0 equiv.), 4CzIPN (1.0 mol%), NaHCO<sub>3</sub> (x equiv.), DMAc

(2.0 mL), irradiation with 10 W Blue LEDs at room temperature, under N<sub>2</sub>, for 18 h. Yields of isolated.



Photocatalyst (PC)<sup>a</sup>

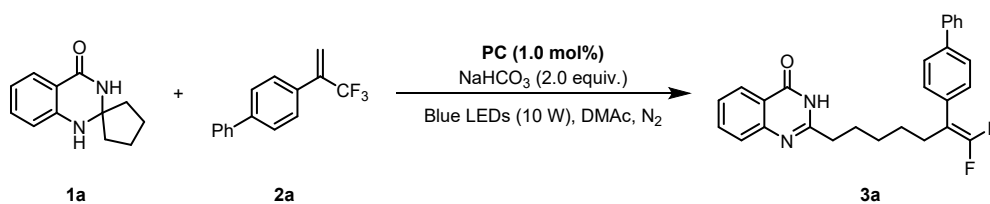

| Entry    | PC                               | Yield of <b>3a</b> (%) <sup>a</sup> |
|----------|----------------------------------|-------------------------------------|
| <b>1</b> | <b>4CzIPN</b>                    | <b>74</b>                           |
| 2        | 4CzTPN                           | 38                                  |
| 3        | 4CzPN                            | 56                                  |
| 4        | Rhodamine B                      | Trace                               |
| 5        | Eosin Y                          | Trace                               |
| 6        | <i>fac</i> -Ir(ppy) <sub>3</sub> | Trace                               |
| 7        | No PC                            | N.R                                 |

<sup>a</sup>Reaction conditions: **1a** (0.24 mmol, 1.2 equiv.), **2a** (0.20 mmol, 1.0 equiv.), PC (1.0 mol%), NaHCO<sub>3</sub> (2.0 equiv.), DMAc (2.0 mL), irradiation with 10 W Blue LEDs at room temperature, under N<sub>2</sub>, for 18 h. Yields of isolated.

Amount of PC<sup>a</sup>

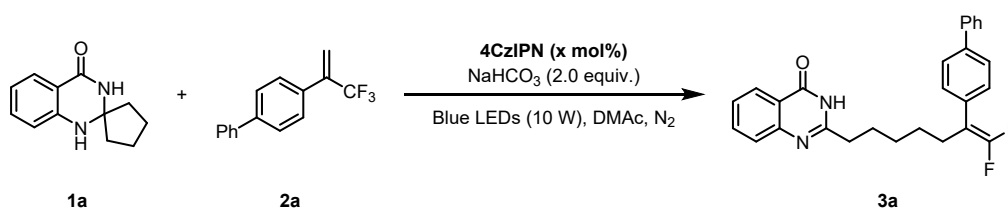

| Entry    | 4CzIPN (x mol %) | Yield of <b>3a</b> (%) <sup>a</sup> |
|----------|------------------|-------------------------------------|
| 1        | 0.5              | 58                                  |
| <b>2</b> | <b>1</b>         | <b>74</b>                           |
| 3        | 1.5              | 74                                  |
| 4        | 2                | 74                                  |

<sup>a</sup>Reaction conditions: **1a** (0.24 mmol, 1.2 equiv.), **2a** (0.20 mmol, 1.0 equiv.), 4CzIPN (x mol%), NaHCO<sub>3</sub> (2.0 equiv.), DMAc (2.0 mL), irradiation with 10 W Blue LEDs at room temperature, under N<sub>2</sub>, for 18 h. Yields of isolated.

Solvent<sup>a</sup>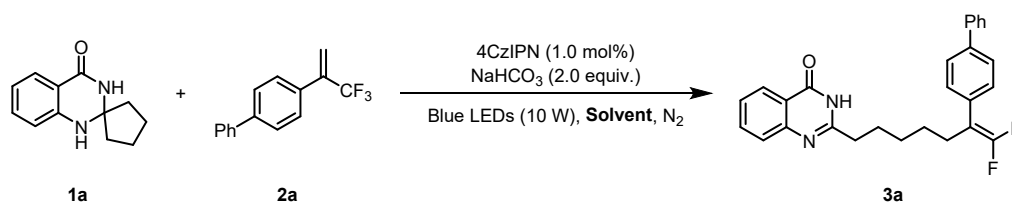

| Entry    | Solvent     | Yield of <b>3a</b> (%) <sup>a</sup> |
|----------|-------------|-------------------------------------|
| <b>1</b> | <b>DMAc</b> | <b>74</b>                           |
| 2        | DMF         | 74                                  |
| 3        | DMSO        | 55                                  |
| 4        | NMP         | 20                                  |
| 5        | MeCN        | <10                                 |
| 6        | MTBE        | <10                                 |
| 7        | DCE         | trace                               |

<sup>a</sup>Reaction conditions: **1a** (0.24 mmol, 1.2 equiv.), **2a** (0.20 mmol, 1.0 equiv.), 4CzIPN (1.0 mol%), NaHCO<sub>3</sub> (2.0 equiv.), Solvent (2.0 mL), irradiation with 10 W Blue LEDs at room temperature, under N<sub>2</sub>, for 18 h. Yields of isolated.

Ratio of **1a:2a**<sup>a</sup>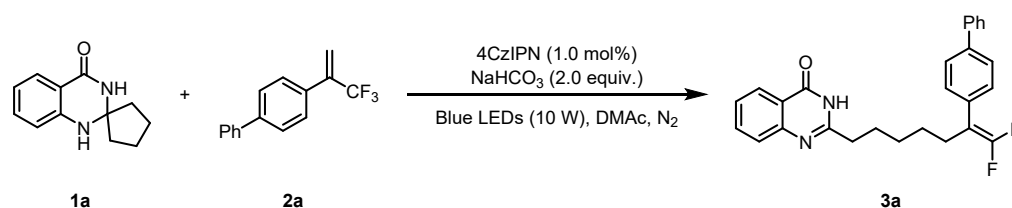

| Entry    | <b>1a:2a</b>   | Yield of <b>3a</b> (%) <sup>a</sup> |
|----------|----------------|-------------------------------------|
| <b>1</b> | <b>1.2:1.0</b> | <b>74</b>                           |
| 2        | 1.5:1.0        | 74                                  |
| 3        | 2.0:1.0        | 73                                  |
| 4        | 1:1.2          | 47                                  |
| 5        | 1:1.5          | 59                                  |
| 6        | 1:2.0          | 72                                  |

<sup>a</sup>Reaction conditions: **1a:2a** = x (0.20 mmol, 1.0 equiv.), 4CzIPN (1.0 mol%), NaHCO<sub>3</sub> (2.0 equiv.), DMAc (2.0 mL), irradiation with 10 W Blue LEDs at room temperature, under N<sub>2</sub>, for 18 h. Yields of isolated.

Light source<sup>a</sup>

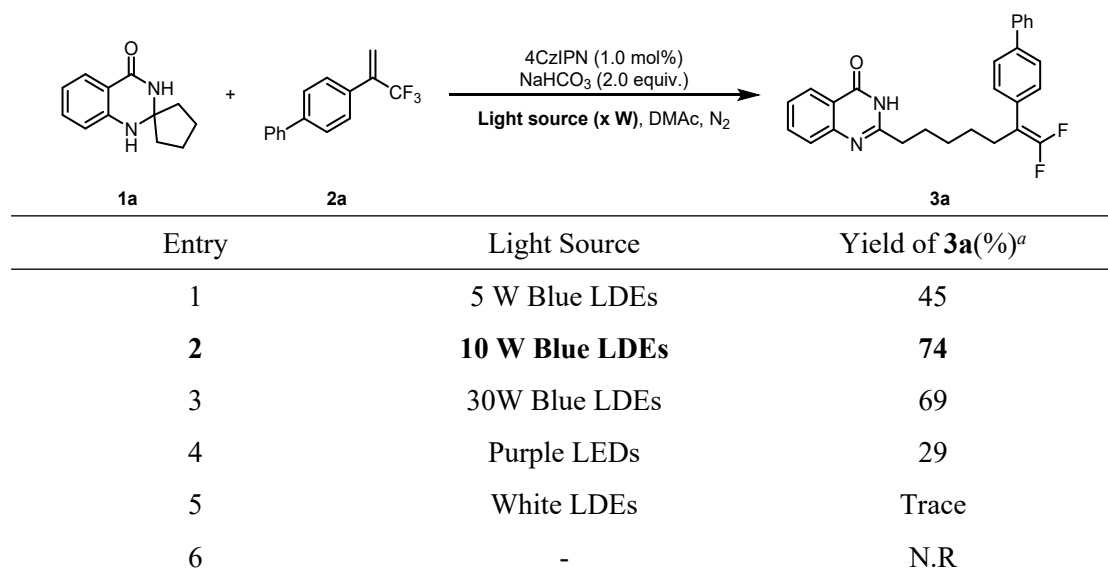

<sup>a</sup>Reaction conditions: **1a** (0.24 mmol, 1.2 equiv.), **2a** (0.20 mmol, 1.0 equiv.), 4CzIPN (1.0 mol%), NaHCO<sub>3</sub> (2.0 equiv.), DMAC (2.0 mL), irradiation with x W LEDs at room temperature, under N<sub>2</sub>, for 18 h. Yields of isolated.

Dry Solvent<sup>a</sup>

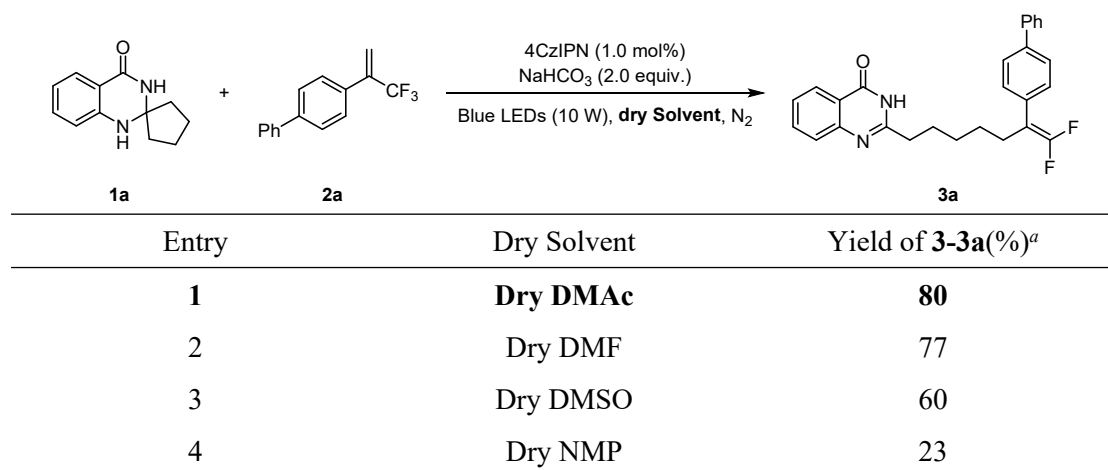

<sup>a</sup>Reaction conditions: **1a** (0.24 mmol, 1.2 equiv.), **2a** (0.20 mmol, 1.0 equiv.), 4CzIPN (1.0 mol%), NaHCO<sub>3</sub> (2.0 equiv.), dry solvent (2.0 mL), irradiation with 10 W Blue LEDs at room temperature, under N<sub>2</sub>, for 18 h. Yields of isolated.

### 3.3 Optimization of the CF<sub>3</sub>-Retained Alkylation **1a** with $\alpha$ -CF<sub>3</sub> Alkene

#### **2b**

Additive<sup>a</sup>

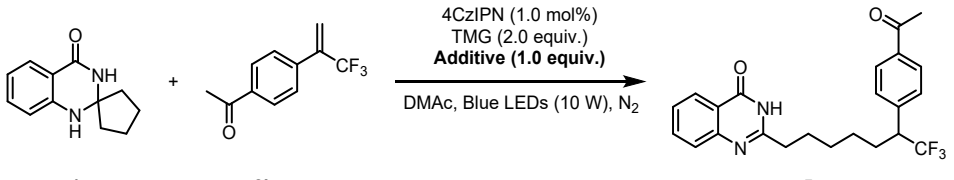

| Entry | Additive      | Yield of <b>5a</b> (%) <sup>a</sup> |
|-------|---------------|-------------------------------------|
| 1     | None          | 38                                  |
| 2     | EtOH          | 44                                  |
| 3     | MeOH          | 48                                  |
| 4     | <i>t</i> BuOH | 50                                  |
| 5     | IPA           | 44                                  |
| 6     | EG            | 51                                  |
| 7     | <b>HFIP</b>   | <b>54</b>                           |

<sup>a</sup>Reaction conditions: **1a** (0.24 mmol, 1.2 equiv.), **2b** (0.20 mmol, 1.0 equiv.), 4CzIPN (1.0 mol%), TMG (2.0 equiv.), Additive (2.0 equiv.), DMAc (2.0 mL), irradiation with 10 W Blue LEDs at room temperature, under N<sub>2</sub>, for 18 h. The yield was determined by <sup>19</sup>F NMR with PhOCF<sub>3</sub> as an internal standard.

Amount of HFIP<sup>a</sup>

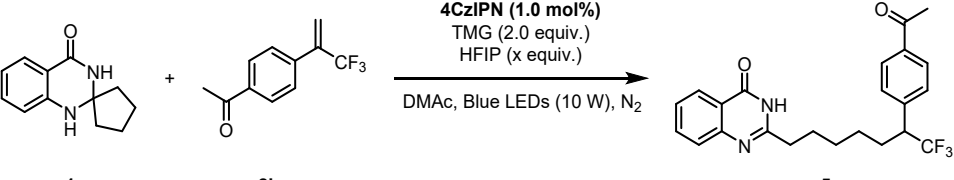

| Entry | HFIP (x equiv.) | Yield of <b>5a</b> (%) <sup>a</sup> |
|-------|-----------------|-------------------------------------|
| 1     | 1.0             | 54                                  |
| 2     | <b>2.0</b>      | <b>58</b>                           |
| 3     | 5.0             | 53                                  |
| 4     | 10.0            | 39                                  |

<sup>a</sup>Reaction conditions: **1a** (0.24 mmol, 1.2 equiv.), **2b** (0.20 mmol, 1.0 equiv.), 4CzIPN (1.0 mol%), TMG (2.0 equiv.), HFIP (x equiv.), DMAc (2.0 mL), irradiation with 10 W Blue LEDs at room temperature, under N<sub>2</sub>, for 18 h. The yield was determined by <sup>19</sup>F NMR with PhOCF<sub>3</sub> as an internal standard.

Photocatalyst (PC)<sup>a</sup>

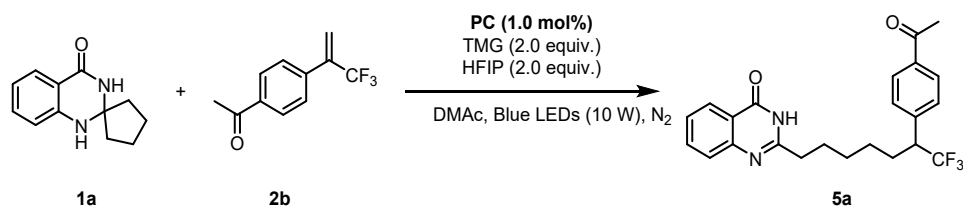

| Entry    | Photocatalyst (PC) | Yield of <b>5a</b> (%) <sup>a</sup> |
|----------|--------------------|-------------------------------------|
| <b>1</b> | <b>4CzIPN</b>      | <b>58</b>                           |
| 2        | 4CzTPN             | 42                                  |
| 3        | 4CzPN              | 45                                  |
| 4        | Fluorescein        | Trace                               |
| 5        | Eosin Y            | Trace                               |

<sup>a</sup>Reaction conditions: **1a** (0.24 mmol, 1.2 equiv.), **2b** (0.20 mmol, 1.0 equiv.), PC (1.0 mol%), TMG (2.0 equiv.), HFIP (2.0 equiv.), DMAc (2.0 mL), irradiation with 10 W Blue LEDs at room temperature, under N<sub>2</sub>, for 18 h. The yield was determined by <sup>19</sup>F NMR with PhOCF<sub>3</sub> as an internal standard.

Ratio of **1a:2b**<sup>a</sup>

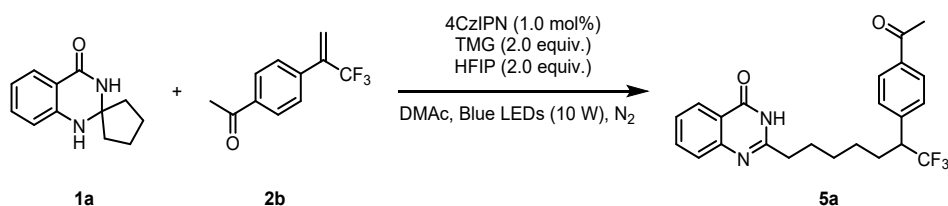

| Entry    | <b>1a:2b</b>   | Yield of <b>5a</b> (%) <sup>a</sup> |
|----------|----------------|-------------------------------------|
| 1        | 1.2:1.0        | 58                                  |
| 2        | 1.0:1.2        | 59                                  |
| 3        | 1.0:1.5        | 70                                  |
| <b>4</b> | <b>1.0:2.0</b> | <b>74</b>                           |

<sup>a</sup>Reaction conditions: **1a:2b** = x (0.20 mmol, 1.0 equiv.), 4CzIPN (1.0 mol%), TMG (2.0 equiv.), HFIP (2.0 equiv.), DMAc (2.0 mL), irradiation with 10 W Blue LEDs at room temperature, under N<sub>2</sub>, for 18 h. The yield was determined by <sup>19</sup>F NMR with PhOCF<sub>3</sub> as an internal standard.

Solvent<sup>a</sup>

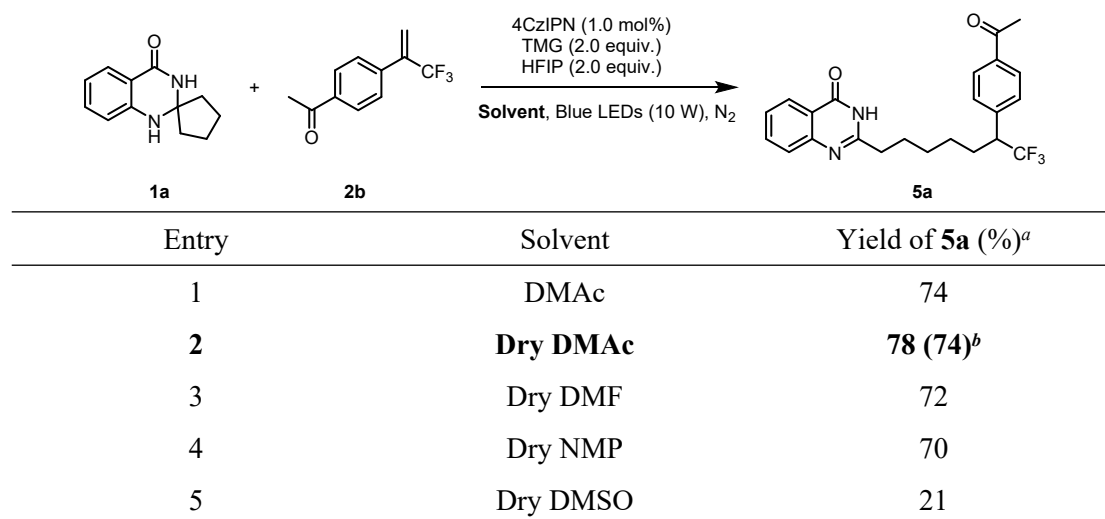

<sup>a</sup>Reaction conditions: **1a** (0.20 mmol, 1.0 equiv.), **2b** (0.40 mmol, 2.0 equiv.), 4CzIPN (1.0 mol%), TMG (2.0 equiv.), HFIP (2.0 equiv.), Solvent (2.0 mL), irradiation with 10 W Blue LEDs at room temperature, under N<sub>2</sub>, for 18 h. The yield was determined by

<sup>19</sup>F NMR with PhOCF<sub>3</sub> as an internal standard. <sup>b</sup>Isolated yield.

## 4. General Procedure for the Synthesis of 3, 4 and 5

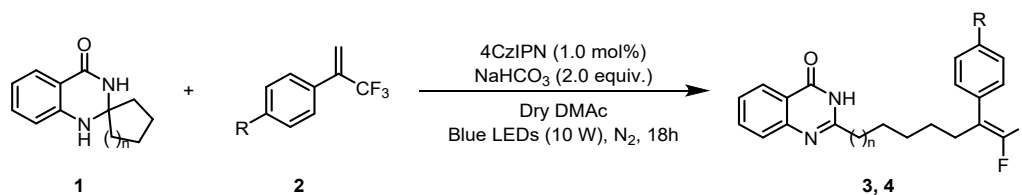

A 10 mL oven-dried Schlenk-tube equipped with a magnetic stirrer was charged with *spiro*-dihydroquinazolinones **1** (0.24 mmol, 1.2 equiv.),  $\alpha$ -CF<sub>3</sub> alkenes **2** (0.2 mmol, 1.0 equiv.), 4CzIPN (1.577 mg, 1.0 mol%), NaHCO<sub>3</sub> (0.4 mmol, 2.0 equiv.). Then, the tube was evacuated and backfilled with nitrogen (three times). Subsequently, dry DMAc (2.0 mL) was added by a syringe. The reaction mixture was stirred under the irradiation of a 10 W Blue LED ( $\lambda = 460$ -470 nm; distance app. 1.0 cm from the bulb) for a specified time. After that, the resulting mixture was quenched with H<sub>2</sub>O and extracted with EtOAc (3  $\times$  10 mL). The combined organic extracts were dried (Na<sub>2</sub>SO<sub>4</sub>) and concentrated under reduced pressure. The crude product was purified by flash column chromatography (petroleum ether/EtOAc = 5:1 to 3:1) on silica gel to afford compound **3, 4**.

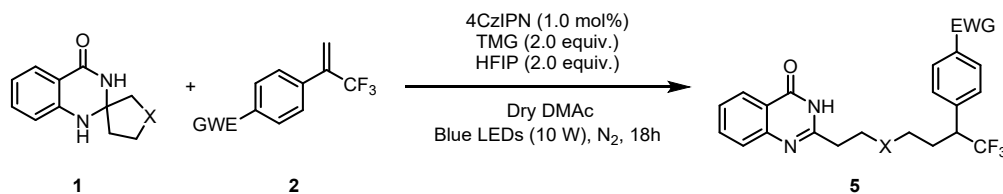

A 10 mL oven-dried Schlenk-tube equipped with a magnetic stirrer was charged with *spiro*-dihydroquinazolinones **1** (0.24 mmol, 1.2 equiv.),  $\alpha$ -CF<sub>3</sub> alkenes **2** (0.2 mmol, 1.0 equiv.), 4CzIPN (1.577 mg, 1.0 mol%) Then, the tube was evacuated and backfilled with nitrogen (three times). Subsequently, a solution of TMG (0.40 mmol, 2.0 equiv.) and HFIP (0.2 mmol, 1.0 equiv.) in dry DMAc (2.0 mL) was added by a syringe. The reaction mixture was stirred under the irradiation of a 10 W blue LED ( $\lambda = 460$ -470 nm; distance app. 1.0 cm from the bulb) for a specified time. After that, the resulting mixture was quenched with H<sub>2</sub>O and extracted with EtOAc (3  $\times$  10 mL). The combined organic extracts were dried (Na<sub>2</sub>SO<sub>4</sub>) and concentrated under reduced pressure. The crude product was purified by flash column chromatography (petroleum ether/EtOAc = 5:1 to 3:1) on silica gel to afford compound **5**.

The Visible-Light Photoredox Catalysis Experimental Setup (photographed by author Li-Na Guo)

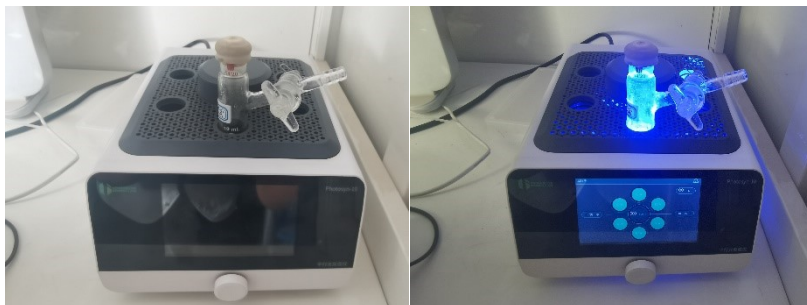



## 5. Scale-up Reaction

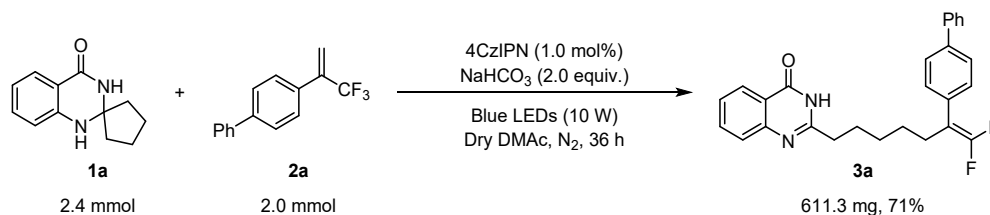

A 50 mL oven-dried Schlenk-tube equipped with a magnetic stirrer was charged with *spiro* dihydroquinazolinone **1a** (2.4 mmol, 1.2 equiv.),  $\alpha$ -CF<sub>3</sub> alkenes **2a** (2.0 mmol, 1.0 equiv.), 4CzIPN (15.77 mg, 1.0 mol%), NaHCO<sub>3</sub> (4.0 mmol, 2.0 equiv.). Then, the tube was evacuated and backfilled with nitrogen (three times). Subsequently, dry DMAc (20 mL) was added by a syringe. The reaction mixture was stirred under the irradiation of a 10 W blue LED ( $\lambda = 460$ -470 nm; distance app. 1.0 cm from the bulb) for 36 h. After that, the resulting mixture was quenched with H<sub>2</sub>O and extracted with EtOAc (3  $\times$  20 mL). The combined organic extracts were dried (Na<sub>2</sub>SO<sub>4</sub>) and concentrated under reduced pressure. The crude product was purified by flash column chromatography (petroleum ether/EtOAc = 5:1 to 3:1) on silica gel to afford compound **3a** in 71% yield.

## 6 Derivatizations of the Product **3a**

### 6.1 Synthesis of the Compound **6a**<sup>2</sup>

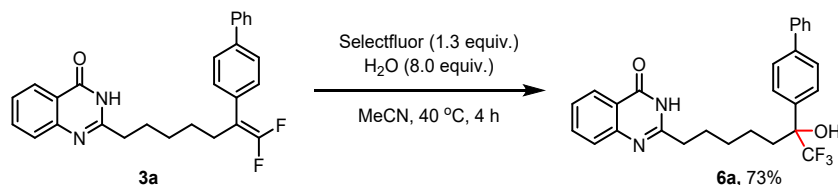

A 10 mL oven-dried Schlenk-tube equipped with a magnetic stirrer was charged with **3a** (0.2 mmol, 1.0 equiv.) and Selectfluor (2.6 mmol, 1.3 equiv.). Then, the tube was evacuated and backfilled with nitrogen (three times). Subsequently, a solution of H<sub>2</sub>O (1.6 mmol, 8.0 equiv.) in MeCN (2.0 mL) was added by a syringe. The reaction mixture was stirred at 40 °C for 4 h. The solvent was removed under reduced pressure. The crude product was purified by flash column chromatography (petroleum ether/EtOAc = 5:1) on silica gel to afford compound **6a** in 73% yield.

### 6.2 Synthesis of the Compound **6b**<sup>3</sup>

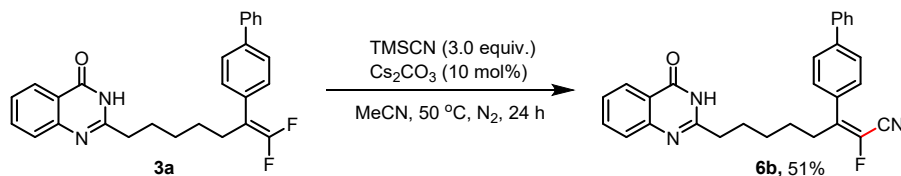

A 10 mL oven-dried Schlenk-tube equipped with a magnetic stirrer was charged with **3a** (0.2 mmol, 1.0 equiv.) and Cs<sub>2</sub>CO<sub>3</sub> (0.02 mmol, 0.1 equiv.). Then, the tube was evacuated and backfilled with nitrogen (three times). Subsequently, a solution of TMSCN (0.6 mmol, 3.0 equiv.) in MeCN (2.0 mL) was added by a syringe. The reaction mixture was stirred at 50 °C for 24h. The solvent was removed under reduced pressure. The crude product was purified by flash column chromatography (petroleum ether/EtOAc = 5:1) on silica gel to afford compound **6b** in 51% yield.

### 6.3 Synthesis of the Compound **6c**<sup>4</sup>

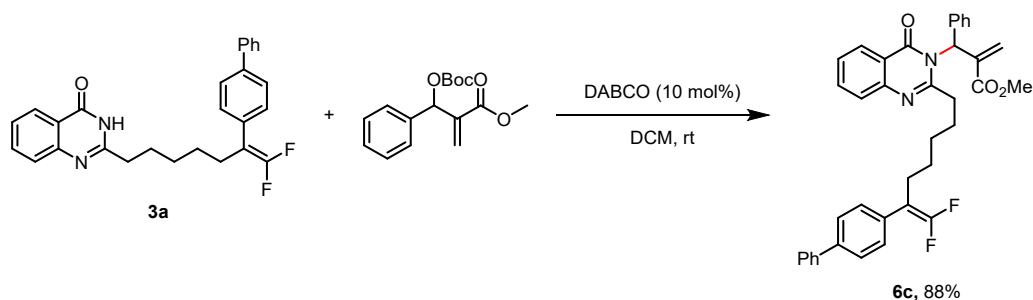

In an oven-dried sealed tube equipped with a Teflon-coated stirring bar, **3a** (0.2 mmol, 1.0 equiv.), Morita–Baylis–Hillman carbonate (0.2mmol, 1.2 equiv.) and DABCO (0.02 mmol, 0.1 equiv.) were dissolved in DCM (2.0 mL). The resulting solution was stirred at room temperature until the reaction was completed as indicated by TLC. The solvent was removed under reduced pressure. The crude product was purified by flash column chromatography (petroleum ether/EtOAc = 5:1) on silica gel to afford compound **6c** in 88% yield.

### 6.4 Synthesis of the Compound **6d**<sup>5</sup>

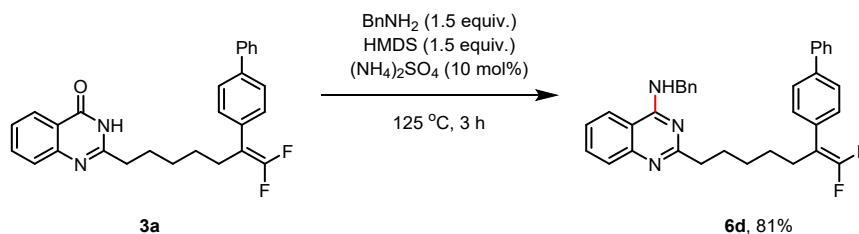

In an oven-dried sealed tube equipped with a Teflon-coated stirring bar, **3a** (86.1mg, 0.2 mmol, 1.0 equiv.), BnNH<sub>2</sub> (0.3 mmol, 1.5 equiv.), HMDS (0.3 mmol, 1.5 equiv.) and (NH<sub>4</sub>)<sub>2</sub>SO<sub>4</sub> (0.02 mmol, 0.1 equiv.). The resulting solution was stirred at 125 °C for 3 h. The solvent was removed under reduced pressure. The crude product was purified by flash column chromatography (petroleum ether/EtOAc = 7:1) on silica gel to afford compound **6d** in 81% yield.

## 7. Two-Step Telescoping Procedure for the Formation of **3a**

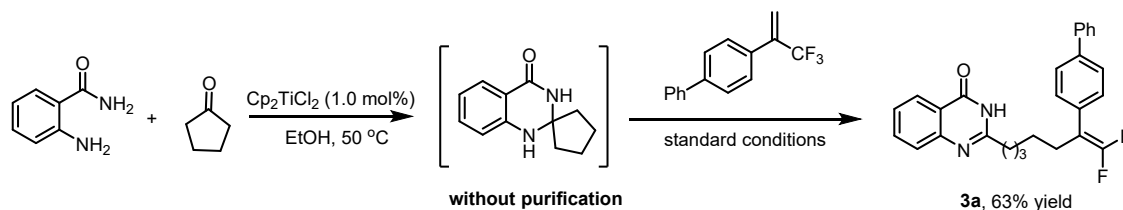

A 10 mL oven-dried Schlenk-tube equipped with a magnetic stirrer was charged with 2-aminobenzamide (0.4 mmol, 1.0 equiv.), and cyclopentanone (0.44 mmol, 1.1 equiv.). Then a solution of  $\text{Cp}_2\text{TiCl}_2$  (1.0 mol%) in EtOH (2.0 mL) was added. The reaction mixture was stirred at 50 °C until the reaction was completed as indicated by TLC. The solvent was removed under reduced pressure. Then  $\alpha\text{-CF}_3$  alkene **2a** (0.2 mmol, 1.0 equiv.), 4CzIPN (1.0 mol%) and  $\text{NaHCO}_3$  (0.4 mmol, 2.0 equiv.) were added. Then, the tube was evacuated and backfilled with nitrogen for three times. Subsequently, dry DMAc (2.0 mL) was added by a syringe. The reaction mixture was then irradiated with 10 W blue LEDs at room temperature for 18 h. The reaction mixture was quenched with brine (10 mL) and extracted with EtOAc ( $3 \times 5$  mL). Then the combined organic layers were dried ( $\text{Na}_2\text{SO}_4$ ) and concentrated under reduced pressure. The crude product was purified by flash column chromatography (petroleum ether/EtOAc = 3:1) on silica gel to afford compound **3a** in 63% yield.

## 8 Mechanistic Investigation

### 8.1 TEMPO-Trapping Experiment

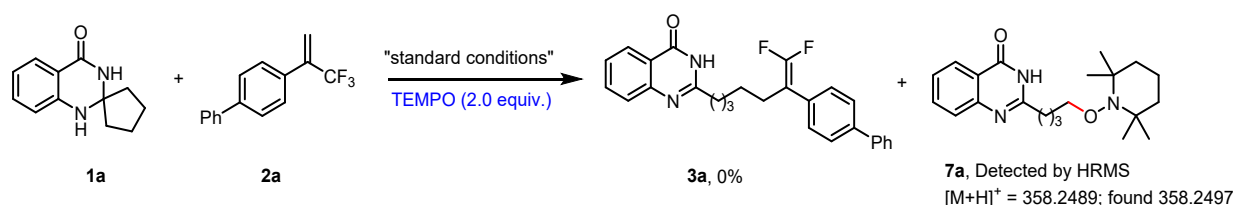

A 10 mL oven-dried Schlenk-tube equipped with a magnetic stirrer was charged with spiro-dihydroquinazolinone **1a** (0.24 mmol, 1.2 equiv.),  $\alpha\text{-CF}_3$  alkene **2a** (0.20 mmol, 1.0 equiv.), 4CzIPN (1.0 mol%),  $\text{NaHCO}_3$  (0.4 mmol, 2.0 equiv.) and TEMPO (0.4 mmol, 2.0 equiv.). Then, the tube was evacuated and backfilled with nitrogen (three times). Subsequently, dry DMAc (2.0 mL) was added by a syringe. The reaction mixture was stirred under the irradiation of a 10 W blue LED ( $\lambda = 460\text{--}470$  nm; distance app. 1.0 cm from the bulb) for 18

h. After that, only a trace amount of **3a** was observed, along with the TEMPO adduct **7a** detected by HRMS. This result indicated that a radical pathway might be involved in this transformation.

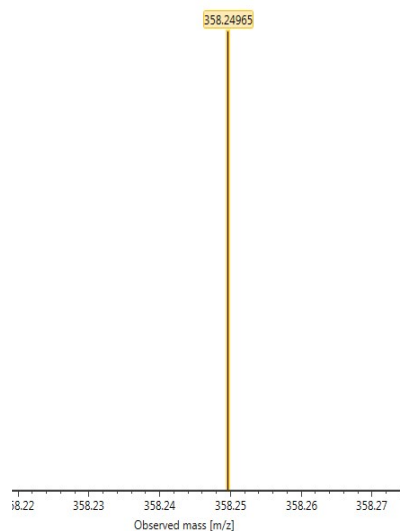

Figure S1. TEMPO adduct **7a** detected by HRMS

## 8.2 BHT-Inhibiting Experiment

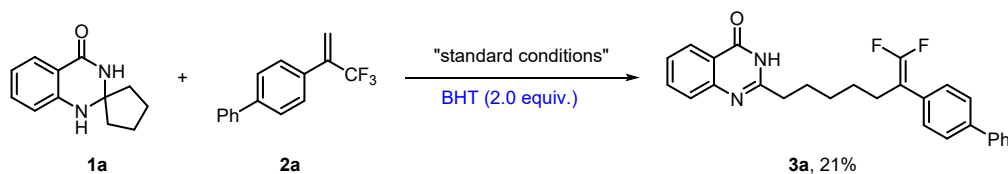

A 10 mL oven-dried Schlenk-tube equipped with a magnetic stirrer was charged with spiro-dihydroquinazolinone **1a** (0.24 mmol, 1.2 equiv.),  $\alpha$ -CF<sub>3</sub> alkene **2a** (0.20 mmol, 1.0 equiv.), 4CzIPN (1.0 mol%), NaHCO<sub>3</sub> (0.4 mmol, 2.0 equiv.) and BHT (0.4 mmol, 2.0 equiv.). Then, the tube was evacuated and backfilled with nitrogen (three times). Subsequently, dry DMAc (2.0 mL) was added by a syringe. The reaction mixture was stirred under the irradiation of a 10 W blue LED ( $\lambda = 460$ – $470$  nm; distance app. 1.0 cm from the bulb) for 18 h. The reaction mixture was quenched with brine (10 mL) and extracted with EtOAc (3 $\times$ 5 mL). The combined organic layers were dried (Na<sub>2</sub>SO<sub>4</sub>) and concentrated under reduced pressure. The crude product was purified by flash column chromatography (petroleum ether/EtOAc =3:1) on silica gel to afford compound **3a** with yield of 21%. This result indicated that a radical pathway might be involved in this transformation.

### 8.3 Radical Clock Experiment

A 10 mL oven-dried Schlenk-tube equipped with a magnetic stirrer was charged with *spiro*-dihydroquinazolinone **1a** (0.24 mmol, 1.2 equiv.),  $\alpha$ -CF<sub>3</sub> alkene **2a** (0.20 mmol, 1.0 equiv.), 4CzIPN (1.0 mol%) and NaHCO<sub>3</sub> (0.4 mmol, 2.0 equiv.). Then, the tube was evacuated and backfilled with nitrogen (three times). Subsequently, a solution of  $\alpha$ -cyclopropylstyrene (0.4 mmol, 2.0 equiv.) in dry DMAc (2.0 mL) was added by a syringe. The reaction mixture was stirred under the irradiation of a 10 W blue LED ( $\lambda$  = 460–470 nm; distance app. 1.0 cm from the bulb) for 18 h. The reaction mixture was quenched with brine (10 mL) and extracted with EtOAc (3×5 mL). The combined organic layers were dried (Na<sub>2</sub>SO<sub>4</sub>) and concentrated under reduced pressure. The crude product was purified by flash column chromatography (petroleum ether/EtOAc =3:1) on silica gel to afford compound **3a** in 53% yield along with **8a** in 12% yield. This result indicated that a radical pathway might be involved in this transformation.

## 8.4 Stern-Volmer Fluorescence Quenching Experiments

To a solution of 4CzIPN in anhydrous, N<sub>2</sub>-saturated dry DMAc ( $5 \times 10^{-4}$  mol/L) in a quartz cuvette, different amounts of *spiro*-dihydroquinazolinones **1a** and  $\alpha$ -CF<sub>3</sub> alkenes **2a** were added, respectively, and the resulting changes in fluorescence intensity (concentration of **1a** and **2a**:  $2 \times 10^{-4}$  mol/L,  $4 \times 10^{-4}$  mol/L,  $6 \times 10^{-4}$  mol/L,  $8 \times 10^{-4}$ ,  $1 \times 10^{-3}$  mol/L) were collected. The emission intensity at 534 nm was collected with excited wavelength of 450 nm. The results are shown in **Figure S2** and **S3**

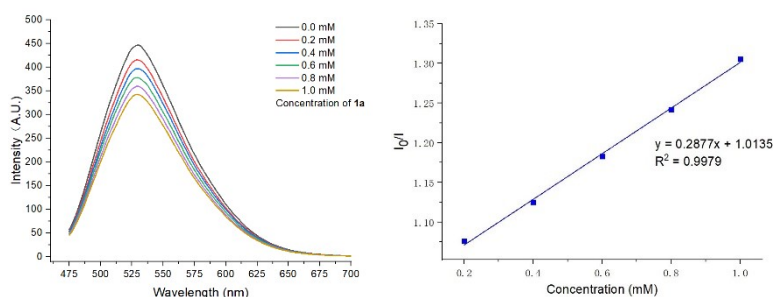

**Figure S2.** (a) The fluorescence emission spectra of 4CzIPN with different concentration of **1a** added. (b) The Stern–Volmer emission quenching studies of **1a**. **I**<sub>0</sub> is the inherent fluorescence intensity of 4CzIPN. **I** is the fluorescence intensity of 4CzIPN in the presence of **1a**.

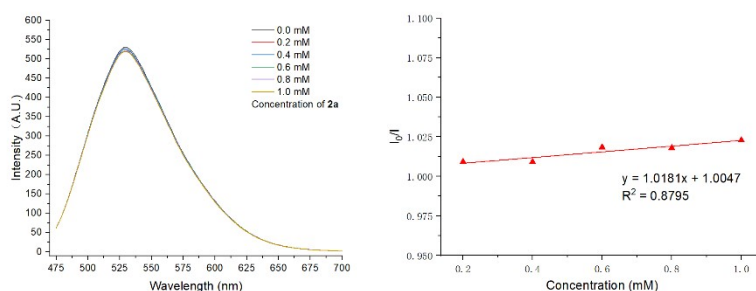

**Figure S3.** (a) The fluorescence emission spectra of 4CzIPN with different concentration of **2a** added. (b) The Stern–Volmer emission quenching studies of **2a**. **I**<sub>0</sub> is the inherent fluorescence intensity of 4CzIPN. **I** is the fluorescence intensity of 4CzIPN in the presence of **2a**. Thus, Stern–Volmer fluorescence quenching studies indicated that the **1a** interacts with the excited state of 4CzIPN rather than **2a**.

## 8.5 Light On-Off Experiments

To further examine the impact of light, we conducted experiments under alternating periods of irradiation and darkness. The yield of **3a** was determined by crude <sup>19</sup>F NMR spectra

using  $\text{PhOCF}_3$  as an internal standard. The results are shown in **Figure S4**.

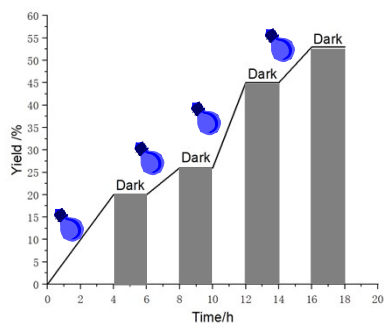

**Figure S3.** Light On-Off Experiments

The results of light on-off experiments indicated that the reaction proceeded only under the irradiation of light. Thus, the reaction may proceed via a catalytic process rather than a radical chain process.



## 8.6 Proposed Mechanism

Based on the above results and the literature<sup>6</sup>, a possible mechanism is proposed (Scheme 7). Under visible light irradiation, 4CzIPN is irradiated to the excited state 4CzIPN\*, which undergoes a single electron transfer (SET) event with dihydroquinazolinone **1** to give the amine radical cation **I** and 4CzIPN<sup>•-</sup>. Intermediate **I** then undergoes deprotonation followed by aromatization-driven C-C bond cleavage to give the alkyl radical intermediate **II**. The radical **II** is then added to the  $\alpha$ -CF<sub>3</sub> alkene **2** to give the CF<sub>3</sub>-containing benzyl radical **III**. Intermediate **III** is then reduced by the 4CzIPN<sup>•-</sup> species to form the carbanion **IV** and regenerate the 4CzIPN. Finally,  $\beta$ -fluoride elimination of the intermediate **IV** yields the *gem*-difluoroallylated product **3** or **4**. Alternatively, the carbanion **IV** can be protonated to give the CF<sub>3</sub>-containing product **5**. The chemoselectivity is related to the stability of the carbanion **IV**. The more stable the carbanion **IV**, the easier the protonation process.

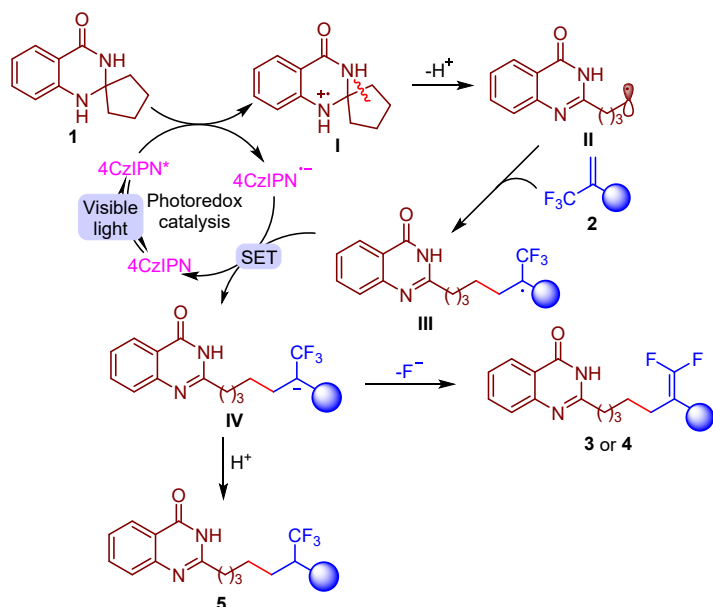

## 9. References

1. Y. Luo, Y. Wu, Y. Wang, H. Sun, Z. Xie, W. Zhang and Z. Gao, *RSC Adv.*, 2016, **6**, 66074.
2. J. Shi, L.-Y. Guo, Q.-P. Hu, Y.-T. Liu, Q. Li and F. Pan, *Org. Lett.*, 2021, **23**, 8822.
3. Y. Li, W.-S. Zhang, S.-N. Yang, X.-Y. Wang, Y. Liu, D.-W. Ji and Q.-A. Chen, *Angew. Chem. Int. Ed.*, 2023, **62**, e202300036.
4. X.-Y. Yao, Z.-Y. Li, H.-B. Mei, J. Escorihuela, V. A. Soloshonok and J.-L. Han, *J. Org. Chem.*, 2023, **88**, 13057.
5. Z.-L. Shen, X.-F. He, Y.-M. Hong, X.-Q. Hu, W.-M. Mo, B.-X. Hu and N. Sun, *Synth. Commun.*, 2011, **41**, 3644.
6. (a) F. Yue, J. Liu, H. Ma, Y. Liu, J. Dong and Q. Wang, *Org. Lett.*, 2022, **24**, 4019; (b) Z.-H. Yuan, H. Xin, L. Zhang, P. Gao, X. Yang, X.-H. Duan and L.-N. Guo, *Green Chem.*, 2023, **25**, 6733.

## 10. Characterization Data of Products

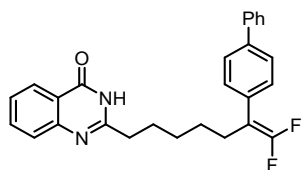

**2-(6-([1,1'-Biphenyl]-4-yl)-7,7-difluorohept-6-en-1-yl)quinazolin-4(3H)-one (3a):** White solid (80%, 68.8 mg); m.p.: 164-165 °C;  $R_f$  = 0.2 (EtOAc/petroleum ether = 1:3);  $^1\text{H}$  NMR (400 MHz,  $\text{CDCl}_3$ ):  $\delta$  = 12.16 (s, 1H), 8.27 (d,  $J$  = 7.2 Hz, 1H), 7.78-7.71 (m, 2H), 7.59-7.54 (m, 4H), 7.46-7.41 (m, 3H), 7.37-7.33 (m, 3H), 2.80 (t,  $J$  = 7.6 Hz, 2H), 2.49-2.44 (m, 2H), 1.94-1.86 (m, 2H), 1.53-1.50 (m, 4H);  $^{13}\text{C}$  NMR (100 MHz,  $\text{CDCl}_3$ ):  $\delta$  = 164.4, 156.9, 153.6 (dd,  $J$  = 289.1, 285.7 Hz), 149.1, 140.5, 140.0, 134.9, 132.5, 128.8, 128.5 (t,  $J$  = 3.7 Hz), 127.3, 127.1, 126.97, 126.96, 126.5, 126.1, 120.3, 91.9 (dd,  $J$  = 21.7, 13.4 Hz), 35.6, 28.5, 27.4, 27.3, 27.2;  $^{19}\text{F}$  NMR (376 MHz,  $\text{CDCl}_3$ )  $\delta$  = -90.91 (d,  $J$  = 43.24 Hz), -91.08 (d,  $J$  = 43.62 Hz) ppm; HRMS (ESI) calcd for  $\text{C}_{27}\text{H}_{25}\text{F}_2\text{N}_2\text{O}$   $[\text{M}+\text{H}]^+$  431.1930, found 431.1928.

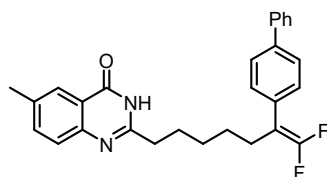

**2-(6-([1,1'-Biphenyl]-4-yl)-7,7-difluorohept-6-en-1-yl)-6-methylquinazolin-4(3H)-one (3b):** White solid (75%, 66.6 mg); m.p.: 183-184 °C;  $R_f$  = 0.2 (EtOAc/petroleum ether = 1:3);  $^1\text{H}$  NMR (400 MHz,  $\text{CDCl}_3$ ):  $\delta$  = 12.14 (s, 1H), 8.08-8.06 (m, 1H), 7.62-7.53 (m, 6H), 7.43 (t,  $J$  = 7.2 Hz, 2H), 7.37-7.32 (m, 3H), 2.78 (t,  $J$  = 7.6 Hz, 2H), 2.48-2.44 (m, 5H), 1.93-1.86 (m, 2H), 1.54-1.49 (m, 4H);  $^{13}\text{C}$  NMR (100 MHz,  $\text{CDCl}_3$ ):  $\delta$  = 164.2, 155.7, 150.8 (dd,  $J$  = 288.2, 284.6 Hz), 147.4, 140.5, 140.0, 136.5, 136.3, 132.5, 128.8, 128.5 (t,  $J$  = 2.6 Hz), 127.3, 127.1, 127.00, 126.97, 125.5, 120.2, 91.9 (dd,  $J$  = 20.3, 14.4 Hz), 35.7, 28.5, 27.4, 27.3, 27.1, 21.2;  $^{19}\text{F}$  NMR (376 MHz,  $\text{CDCl}_3$ ):  $\delta$  = -90.93 (d,  $J$  = 43.62 Hz), -91.09 (d,  $J$  = 43.24 Hz) ppm; HRMS (ESI) calcd for  $\text{C}_{28}\text{H}_{27}\text{F}_2\text{N}_2\text{O}$   $[\text{M}+\text{H}]^+$  445.2086, found 445.2092.

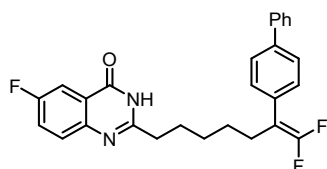

**2-(6-([1,1'-Biphenyl]-4-yl)-7,7-difluorohept-6-en-1-yl)-6-fluoroquinazolin-4(3H)-one (3c):** White solid (77%, 69.0 mg); m.p.: 164-165 °C;  $R_f$  = 0.2 (EtOAc/petroleum ether = 1:3);  $^1\text{H}$  NMR (400 MHz,  $\text{DMSO}-d_6$ ):  $\delta$  = 12.28 (s, 1H), 7.75-7.72 (m, 1H), 7.68-7.62 (m, 6H), 7.48-

7.45 (m, 2H), 7.42-7.35 (m, 3H), 2.55 (t,  $J = 7.2$  Hz, 2H), 2.45-2.41 (m, 2H), 1.72-1.65 (m, 2H), 1.38-1.31 (m, 4H);  $^{13}\text{C}$  NMR (100 MHz,  $\text{DMSO-}d_6$ ):  $\delta = 161.3$  (d,  $J = 3.6$  Hz), 160.9, 158.5, 156.9, 153.0 (dd,  $J = 288.2, 285.8$  Hz), 145.9, 139.4 (d,  $J = 26.9$  Hz), 132.0 (t,  $J = 2.3$  Hz), 129.6 (d,  $J = 8.0$  Hz), 129.1, 128.7 (t,  $J = 2.5$  Hz), 127.7, 126.9, 126.7, 122.8 (d,  $J = 23.8$  Hz), 122.0 (d,  $J = 8.3$  Hz), 110.3 (d,  $J = 23.1$  Hz), 92.4 (dd,  $J = 20.3, 13.1$  Hz), 34.3, 27.7, 26.9, 26.7, 26.4;  $^{19}\text{F}$  NMR (376 MHz,  $\text{DMSO-}d_6$ )  $\delta = -90.93$  (d,  $J = 43.62$  Hz),  $-91.09$  (d,  $J = 43.62$  Hz),  $-113.05$ - $-113.11$  (m) ppm; HRMS (ESI) calcd for  $\text{C}_{27}\text{H}_{24}\text{F}_2\text{N}_2\text{O}$   $[\text{M}+\text{H}]^+$  449.1835, found 448.1849.

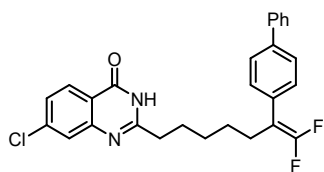

**2-(6-([1,1'-Biphenyl]-4-yl)-7,7-difluorohept-6-en-1-yl)-7-chloroquinazolin-4(3H)-one**

**(3d):** White solid (70%, 65.0 mg); m.p.: 164.3-164.9 °C;  $R_f = 0.2$  (EtOAc/petroleum ether = 1:3);  $^1\text{H}$  NMR (400 MHz,  $\text{DMSO-}d_6$ ):  $\delta = 12.29$  (s, 1H), 8.06-8.03 (m, 1H), 7.66-7.59 (m, 6H), 7.48-7.44 (m, 3H), 7.40-7.35 (m, 2H), 2.55 (t,  $J = 8.4$  Hz, 2H), 2.44-2.39 (m, 2H), 1.74-1.62 (m, 2H), 1.39-1.29 (m, 4H);  $^{13}\text{C}$  NMR (100 MHz,  $\text{DMSO-}d_6$ ):  $\delta = 161.3, 159.2, 155.8$  (dd,  $J = 283.5, 280.8$  Hz), 150.2, 139.6, 139.3, 139.0, 132.0, 129.1, 128.7 (t,  $J = 2.7$  Hz), 127.9, 127.7, 126.9, 126.7, 126.3, 126.0, 119.7, 92.4 (dd,  $J = 20.3, 12.5$  Hz), 34.4, 27.7, 26.9, 26.7, 26.4;  $^{19}\text{F}$  NMR (376 MHz,  $\text{DMSO-}d_6$ ):  $\delta = -91.69$  (d,  $J = 45.50$  Hz),  $-91.89$  (d,  $J = 45.50$  Hz) ppm; HRMS (ESI) calcd for  $\text{C}_{27}\text{H}_{24}\text{ClF}_2\text{N}_2\text{O}$   $[\text{M}+\text{H}]^+$  465.1540, found 465.1549.

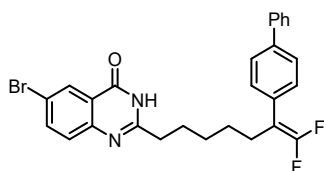

**2-(6-([1,1'-Biphenyl]-4-yl)-7,7-difluorohept-6-en-1-yl)-6-bromoquinazolin-4(3H)-one**

**(3e):** White solid (62%, 63.0 mg); m.p.: 109-110 °C;  $R_f = 0.2$  (EtOAc/petroleum ether = 1:2);  $^1\text{H}$  NMR (400 MHz,  $\text{DMSO-}d_6$ ):  $\delta = 12.34$  (s, 1H), 8.14-8.12 (m, 1H), 7.89-7.86 (m, 1H), 7.67-7.62 (m, 4H), 7.53-7.45 (m, 4H), 7.41-7.38 (m, 2H), 2.55 (t,  $J = 6.4$  Hz, 2H), 2.44-2.40 (m, 2H), 1.70-1.64 (m, 2H), 1.36-1.30 (m, 4H);  $^{13}\text{C}$  NMR (100 MHz,  $\text{DMSO-}d_6$ ):  $\delta = 160.8, 158.3, 153.0$  (dd,  $J = 287.1, 284.9$  Hz), 148.0, 139.6, 139.3, 137.2, 132.0, 129.3, 129.1, 128.7 (t,  $J = 3.3$  Hz), 127.9, 127.7, 126.9, 126.7, 122.5, 118.3, 92.4 (dd,  $J = 20.1, 12.8$  Hz), 34.5, 27.7, 26.9, 26.7, 26.4;  $^{19}\text{F}$  NMR (376 MHz,  $\text{DMSO-}d_6$ ):  $\delta = -90.88$  (d,  $J = 43.24$  Hz),  $-90.53$  (d,  $J = 43.24$  Hz) ppm; HRMS (ESI) calcd for  $\text{C}_{27}\text{H}_{24}\text{BrF}_2\text{N}_2\text{O}$   $[\text{M}+\text{H}]^+$  509.1035, found 509.1040.

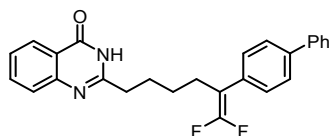

**2-(5-((1,1'-Biphenyl)-4-yl)-6,6-difluorohex-5-en-1-yl)quinazolin-4(3H)-one (3f):** White solid (78%, 64.9 mg); m.p.: 162-163 °C;  $R_f = 0.2$  (EtOAc/petroleum ether = 1:2);  $^1\text{H NMR}$  (400 MHz,  $\text{CDCl}_3$ ):  $\delta = 12.14$  (s, 1H), 8.25 (d,  $J = 8.0$  Hz, 1H), 7.76-7.68 (m, 2H), 7.57-7.52 (m, 4H), 7.46-7.33 (m, 6H), 2.80 (t,  $J = 7.6$  Hz, 2H), 2.56-2.51 (m, 2H), 1.99-1.91 (m, 2H), 1.63-1.55 (m, 2H);  $^{13}\text{C NMR}$  (100 MHz,  $\text{CDCl}_3$ ):  $\delta = 164.5, 156.7, 153.8$  (dd,  $J = 284.0, 280.7$  Hz), 149.4, 140.6, 140.1, 135.0, 132.5, 128.9, 128.6 (t,  $J = 3.1$  Hz), 127.5, 127.24, 127.20, 127.1, 126.6, 126.3, 120.5, 91.8 (dd,  $J = 20.1, 14.3$  Hz), 35.5, 27.4, 27.3, 26.9;  $^{19}\text{F NMR}$  (376 MHz,  $\text{CDCl}_3$ )  $\delta = -90.60$  (d,  $J = 42.86$  Hz),  $-90.74$  (d,  $J = 42.86$  Hz) ppm; HRMS (ESI) calcd for  $\text{C}_{26}\text{H}_{23}\text{F}_2\text{N}_2\text{O}$   $[\text{M}+\text{H}]^+$  417.1773, found 417.1783.

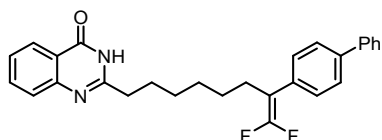

**2-(7-((1,1'-Biphenyl)-4-yl)-8,8-difluorooct-7-en-1-yl)quinazolin-4(3H)-one (3g):** White solid (42%, 37.3 mg); m.p.: 189-190 °C;  $R_f = 0.2$  (EtOAc/petroleum ether = 1:3);  $^1\text{H NMR}$  (400 MHz,  $\text{CDCl}_3$ ):  $\delta = 12.23$  (s, 1H), 8.29 (d,  $J = 7.6$  Hz, 1H), 7.78-7.70 (m, 3H), 7.59-7.55 (m, 4H), 7.47-7.42 (m, 3H), 7.37-7.35 (m, 2H), 2.79 (t,  $J = 7.6$  Hz, 2H), 2.49-2.40 (m, 2H), 1.94-1.85 (m, 2H), 1.50-1.41 (m, 6H);  $^{13}\text{C NMR}$  (100 MHz,  $\text{CDCl}_3$ ):  $\delta = 164.5, 156.9, 153.6$  (dd,  $J = 288.1, 286.2$  Hz), 149.5, 140.5, 139.9, 134.8, 132.6, 128.7, 128.5 (t,  $J = 3.6$  Hz), 127.3, 127.2, 127.0, 126.9, 126.3, 126.1, 120.4, 92.0 (dd,  $J = 20.0, 14.2$  Hz), 35.8, 28.8, 28.6, 27.5, 27.4;  $^{19}\text{F NMR}$  (376 MHz,  $\text{CDCl}_3$ )  $\delta = -91.91$  (d,  $J = 44.74$  Hz),  $-92.05$  (d,  $J = 43.24$  Hz) ppm; HRMS (ESI) calcd for  $\text{C}_{28}\text{H}_{27}\text{F}_2\text{N}_2\text{O}$   $[\text{M}+\text{H}]^+$  445.2086, found 445.2098.

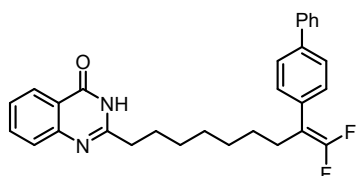

**2-(8-((1,1'-Biphenyl)-4-yl)-9,9-difluoronon-8-en-1-yl)quinazolin-4(3H)-one (3h):** White solid (44%, 40.3 mg); m.p.: 134-135 °C;  $R_f = 0.2$  (EtOAc/petroleum ether = 1:3);  $^1\text{H NMR}$  (400 MHz,  $\text{CDCl}_3$ ):  $\delta = 12.17$  (s, 1H), 8.28 (dd,  $J = 8.0, 1.6$  Hz, 1H), 7.77-7.69 (m, 2H), 7.61-7.57 (m, 4H), 7.46-7.41 (m, 3H), 7.38-7.33 (m, 3H), 2.80 (t,  $J = 8.0$  Hz, 2H), 2.44-2.39 (m, 2H), 1.92-1.85 (m, 2H), 1.49-1.33 (m, 8H);  $^{13}\text{C NMR}$  (100 MHz,  $\text{CDCl}_3$ ):  $\delta = 164.5, 157.0, 153.7$  (dd,  $J = 296.0, 282.1$  Hz), 149.5, 140.5, 139.9, 134.8, 132.7, 128.8, 128.5 (t,  $J = 2.4$  Hz), 127.3, 127.2, 127.03, 126.95, 126.3, 126.1, 120.4, 92.1 (dd,  $J = 21.9, 12.7$  Hz), 35.8, 29.1, 28.9, 28.8,

27.7, 27.44, 27.40;  $^{19}\text{F}$  NMR (376 MHz,  $\text{CDCl}_3$ )  $\delta = -90.04$  (d,  $J = 44.74$  Hz),  $-91.22$  (d,  $J = 43.24$  Hz) ppm; HRMS (ESI) calcd for  $\text{C}_{29}\text{H}_{29}\text{F}_2\text{N}_2\text{O}$   $[\text{M}+\text{H}]^+$  459.2243, found 459.2245

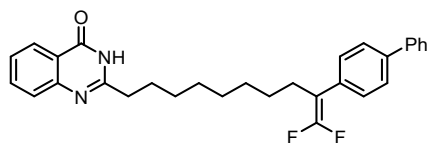

**2-(9-((1,1'-Biphenyl)-4-yl)-10,10-difluorodec-9-en-1-yl)quinazolin-4(3H)-one (3i):** White solid (58%, 54.8 mg); m.p.: 134-135 °C;  $R_f = 0.2$  (EtOAc/petroleum ether = 1:3);  $^1\text{H}$  NMR (400 MHz,  $\text{CDCl}_3$ ):  $\delta = 12.02$  (s, 1H), 8.28 (dd,  $J = 7.6, 1.2$  Hz, 1H), 7.78-7.70 (m, 2H), 7.60-7.56 (m, 4H), 7.47-7.41 (m, 3H), 7.38-7.32 (m, 3H), 2.79 (t,  $J = 7.6$  Hz, 2H), 2.42-2.39 (m, 2H), 1.91-1.84 (m, 2H), 1.47-1.30 (m, 10H);  $^{13}\text{C}$  NMR (100 MHz,  $\text{CDCl}_3$ ):  $\delta = 164.5, 157.0, 153.6$  (dd,  $J = 285.4, 279.9$  Hz), 149.5, 140.5, 139.9, 134.8, 132.7, 128.7, 128.5 (t,  $J = 3.1$  Hz), 127.3, 127.2, 127.0, 126.9, 126.3, 126.1, 120.4, 92.1 (dd,  $J = 20.9, 13.3$  Hz), 35.9, 29.14, 29.12, 29.0, 28.9, 27.7, 27.5, 27.4;  $^{19}\text{F}$  NMR (376 MHz,  $\text{CDCl}_3$ )  $\delta = -91.12$  (d,  $J = 43.62$  Hz),  $-91.3$  (d,  $J = 43.24$  Hz) ppm; HRMS (ESI) calcd for  $\text{C}_{30}\text{H}_{31}\text{F}_2\text{N}_2\text{O}$   $[\text{M}+\text{H}]^+$  473.2399, found 473.2398.

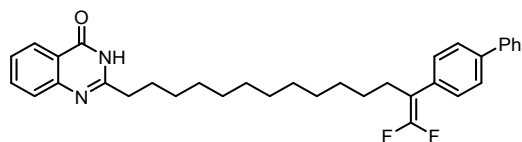

**2-(13-((1,1'-Biphenyl)-4-yl)-14,14-difluorotetradec-13-en-1-yl)quinazolin-4(3H)-one (3j):** White solid (57%, 60.2 mg); m.p.: 181-182 °C;  $R_f = 0.2$  (EtOAc/petroleum ether = 1:3);  $^1\text{H}$  NMR (400 MHz,  $\text{CDCl}_3$ ):  $\delta = 12.29$  (s, 1H), 8.30 (dd,  $J = 8.0, 1.2$  Hz, 1H), 7.79-7.71 (m, 2H), 7.62-7.58 (m, 4H), 7.48-7.38 (m, 5H), 7.37-7.33 (m, 1H), 2.82 (t,  $J = 7.6$  Hz, 2H), 2.45-2.40 (m, 2H), 1.94-1.86 (m, 2H), 1.51-1.44 (m, 2H), 1.41-1.36 (m, 4H), 1.31-1.20 (m, 12H);  $^{13}\text{C}$  NMR (100 MHz,  $\text{CDCl}_3$ ):  $\delta = 164.5, 157.1, 153.6$  (dd,  $J = 289.5, 286.3$  Hz), 149.5, 140.5, 139.8, 134.7, 132.8, 128.7, 128.5 (t,  $J = 2.9$  Hz), 127.3, 127.1, 127.0, 126.9, 126.2, 126.1, 120.4, 92.1 (dd,  $J = 20.1, 13.8$  Hz), 35.9, 29.5, 29.4, 29.2, 29.0, 27.7, 27.6, 27.4;  $^{19}\text{F}$  NMR (376 MHz,  $\text{CDCl}_3$ )  $\delta = -91.29$  (d,  $J = 40.61$  Hz),  $-91.70$  (d,  $J = 39.10$  Hz) ppm; HRMS (ESI) calcd for  $\text{C}_{35}\text{H}_{39}\text{F}_2\text{N}_2\text{O}$   $[\text{M}+\text{H}]^+$  529.3025, found 529.3048.

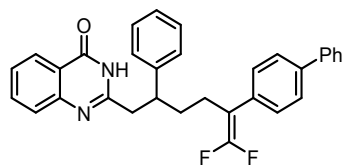

**2-(5-((1,1'-Biphenyl)-4-yl)-6,6-difluoro-2-phenylhex-5-en-1-yl)quinazolin-4(3H)-one (3k):** White solid (79%, 77.8 mg); m.p.: 149-150 °C;  $R_f = 0.2$  (EtOAc/petroleum ether = 1:3);  $^1\text{H}$  NMR (400 MHz,  $\text{CDCl}_3$ ):  $\delta = 12.16$  (s, 1H), 8.24 (dd,  $J = 8.4, 1.6$  Hz, 1H), 7.75-7.68 (m, 2H), 7.53-7.51 (m, 2H), 7.45-7.41 (m, 5H), 7.40-7.31 (m, 2H), 7.30-7.26 (m, 3H), 7.25-7.18 (m, 3H), 3.46-3.38 (m, 1H), 3.07-2.97 (m, 2H), 2.39-2.30 (m, 2H), 1.93-1.87 (m, 2H);  $^{13}\text{C}$  NMR

(100 MHz, CDCl<sub>3</sub>):  $\delta$  = 164.2, 155.0, 153.4 (dd,  $J$  = 288.5, 285.4 Hz), 149.2, 142.7, 140.4, 139.8, 134.7, 132.1 (t,  $J$  = 3.4 Hz), 128.7, 128.6, 128.4, (t,  $J$  = 2.5 Hz), 127.7, 127.3, 127.2, 126.94, 126.92, 126.85, 126.4, 126.1, 120.3, 91.5 (dd,  $J$  = 20.9, 12.7 Hz), 43.7, 43.3, 33.0, 25.1; <sup>19</sup>F NMR (376 MHz, CDCl<sub>3</sub>)  $\delta$  = -90.19 (d,  $J$  = 41.36 Hz), -90.59 (d,  $J$  = 42.86 Hz) ppm; HRMS (ESI) calcd for C<sub>32</sub>H<sub>27</sub>F<sub>2</sub>N<sub>2</sub>O [M+H]<sup>+</sup> 493.2086, found 493.2088

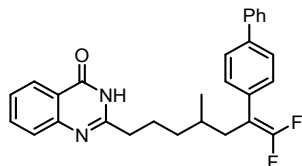

**2-(6-((1,1'-Biphenyl)-4-yl)-7,7-difluoro-4-methylhept-6-en-1-yl)quinazolin-4(3H)-one**

**(3l)**: White solid (76%, 67.5 mg); m.p.: 109-110 °C;  $R_f$  = 0.2 (EtOAc/petroleum ether = 1:3); <sup>1</sup>H NMR (400 MHz, CDCl<sub>3</sub>):  $\delta$  = 12.66 (s, 1H), 8.32 (d,  $J$  = 8.4 Hz, 1H), 7.79-7.73 (m, 2H), 7.59-7.55 (m, 4H), 7.48-7.33 (m, 6H), 2.81 (t,  $J$  = 7.2 Hz, 2H), 2.55-2.49 (m, 1H), 2.34-2.28 (m, 1H), 2.06-1.86 (m, 2H), 1.65-1.55 (m, 2H), 1.44-1.34 (m, 1H), 0.97 (d,  $J$  = 6.4 Hz, 3H); <sup>13</sup>C NMR (100 MHz, CDCl<sub>3</sub>):  $\delta$  = 164.7, 156.9, 154.0 (dd,  $J$  = 282.9, 279.3 Hz), 149.4, 140.3, 139.8, 134.7, 132.6 (t,  $J$  = 3.6 Hz), 128.7, 128.5 (t,  $J$  = 3.3 Hz), 127.2, 127.1, 127.0, 126.8, 126.2, 126.0, 120.3, 91.0 (dd,  $J$  = 21.8, 13.0 Hz), 35.91, 35.86, 34.6, 30.8, 24.8, 19.0; <sup>19</sup>F NMR (376 MHz, CDCl<sub>3</sub>)  $\delta$  = -90.62 (d,  $J$  = 43.24 Hz), -90.96 (d,  $J$  = 43.24 Hz) ppm; HRMS (ESI) calcd for C<sub>28</sub>H<sub>27</sub>F<sub>2</sub>N<sub>2</sub>O [M+H]<sup>+</sup> 445.2086, found 445.2099.

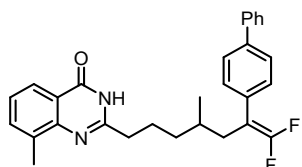

**2-(6-((1,1'-biphenyl)-4-yl)-7,7-difluoro-4-methylhept-6-en-1-yl)-8-methylquinazolin-**

**4(3H)-one (3m)**: White solid (78%, 71.5 mg); m.p.: 100-101 °C;  $R_f$  = 0.2 (EtOAc/petroleum ether = 1:3); <sup>1</sup>H NMR (400 MHz, CDCl<sub>3</sub>):  $\delta$  = 12.26 (s, 1H), 8.14 (d,  $J$  = 8.4 Hz, 1H), 7.61-7.53 (m, 5H), 7.45-7.41 (m, 2H), 7.38-7.31 (m, 4H), 2.79 (t,  $J$  = 7.2 Hz, 2H), 2.63 (s, 3H), 2.54-2.47 (m, 1H), 2.32-2.26 (m, 1H), 2.02-1.94 (m, 1H), 1.90-1.83 (m, 1H), 1.64-1.53 (m, 2H), 1.41-1.33 (m, 1H), 0.94 (d,  $J$  = 5.6 Hz, 3H); <sup>13</sup>C NMR (100 MHz, CDCl<sub>3</sub>):  $\delta$  = 164.9, 155.4, 154.4 (dd,  $J$  = 288.2, 284.9 Hz), 147.9, 140.4, 139.9, 135.7, 135.3, 132.7 (t,  $J$  = 3.7 Hz), 128.7, 128.5 (t,  $J$  = 3.2 Hz), 127.3, 127.0, 126.9, 125.7, 123.7, 120.2, 91.1 (dd,  $J$  = 21.5, 12.5 Hz), 35.9, 35.6, 34.7, 30.9, 24.5, 19.0, 17.6; <sup>19</sup>F NMR (376 MHz, CDCl<sub>3</sub>)  $\delta$  = -90.61 (d,  $J$  = 43.24 Hz), -90.96 (d,  $J$  = 43.24 Hz) ppm; HRMS (ESI) calcd for C<sub>29</sub>H<sub>29</sub>F<sub>2</sub>N<sub>2</sub>O [M+H]<sup>+</sup> 459.2242, found 459.2246.

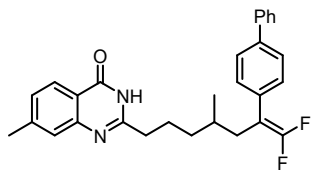

**2-(6-([1,1'-Biphenyl]-4-yl)-7,7-difluoro-4-methylhept-6-en-1-yl)-7-methylquinazolin-**

**4(3H)-one (3n):** White solid (78%, 71.5 mg); m.p.: 131-132 °C;  $R_f = 0.2$  (EtOAc/petroleum ether = 1:3);  $^1\text{H NMR}$  (400 MHz,  $\text{CDCl}_3$ ):  $\delta = 12.34$  (s, 1H), 8.16 (dd,  $J = 8.0, 3.2$  Hz, 1H), 7.57-7.51 (m, 5H), 7.44-7.40 (m, 2H), 7.38-7.32 (m, 3H), 7.27-7.24 (m, 1H), 2.76 (t,  $J = 8.4$  Hz, 2H), 2.52-2.45 (m, 4H), 2.32-2.25 (m, 1H), 1.97-1.81 (m, 2H), 1.62-1.52 (m, 2H), 1.40-1.30 (m, 1H), 0.93 (d,  $J = 6.4$  Hz, 3H);  $^{13}\text{C NMR}$  (100 MHz,  $\text{CDCl}_3$ ):  $\delta = 164.4, 157.0, 154.0$  (dd,  $J = 289.0, 285.2$  Hz), 149.4, 145.9, 140.4, 139.9, 132.6 (t,  $J = 3.4$  Hz), 128.7, 128.5 (t,  $J = 3.3$  Hz), 127.9, 127.3, 127.0, 126.9, 126.8, 125.9, 117.9, 91.1 (dd,  $J = 21.6, 12.8$  Hz), 36.0, 35.9, 34.7, 30.9, 24.9, 21.9, 19.0;  $^{19}\text{F NMR}$  (376 MHz,  $\text{CDCl}_3$ )  $\delta = -90.64$  (d,  $J = 43.24$  Hz), -90.98 (d,  $J = 43.99$  Hz) ppm; HRMS (ESI) calcd for  $\text{C}_{29}\text{H}_{29}\text{F}_2\text{N}_2\text{O}$   $[\text{M}+\text{H}]^+$  459.2242, found 459.2251.

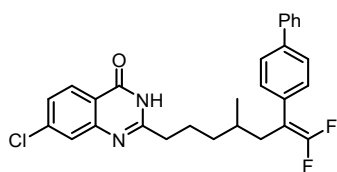

**2-(6-([1,1'-Biphenyl]-4-yl)-7,7-difluoro-4-methylhept-6-en-1-yl)-7-chloroquinazolin-**

**4(3H)-one (3o):** White solid (72%, 68.8 mg); m.p.: 102-103 °C;  $R_f = 0.2$  (EtOAc/petroleum ether = 1:3);  $^1\text{H NMR}$  (400 MHz,  $\text{CDCl}_3$ ):  $\delta = 12.39$  (s, 1H), 8.17 (dd,  $J = 8.4, 1.2$  Hz, 1H), 7.71-7.70 (m, 1H), 7.58-7.54 (m, 4H), 7.45-7.32 (m, 6H), 2.75 (t,  $J = 6.8$  Hz, 2H), 2.51-2.45 (m, 1H), 2.32-2.27 (m, 1H), 1.99-1.92 (m, 1H), 1.88-1.81 (m, 1H), 1.62-1.51 (m, 2H), 1.38-1.26 (m, 1H), 0.94 (d,  $J = 6.4$  Hz, 3H);  $^{13}\text{C NMR}$  (100 MHz,  $\text{CDCl}_3$ ):  $\delta = 164.0, 158.2, 154.0$  (dd,  $J = 289.4, 285.5$  Hz), 150.3, 141.0, 140.3, 139.9, 132.6 (t,  $J = 3.8$  Hz), 128.7, 128.5 (t,  $J = 3.3$  Hz), 127.5, 127.3, 127.0, 126.9, 126.85, 126.76, 118.7, 91.0 (dd,  $J = 21.2, 12.8$  Hz), 35.8, 35.7, 34.7, 30.9, 24.6, 19.0;  $^{19}\text{F NMR}$  (376 MHz,  $\text{CDCl}_3$ )  $\delta = -90.54$  (d,  $J = 43.24$  Hz), -90.85 (d,  $J = 43.62$  Hz) ppm; HRMS (ESI) calcd for  $\text{C}_{28}\text{H}_{26}\text{ClF}_2\text{N}_2\text{O}$   $[\text{M}+\text{H}]^+$  479.1696, found 479.1702.

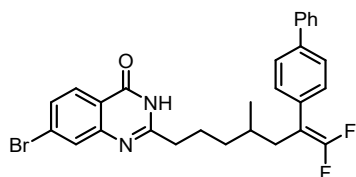

**2-(6-([1,1'-Biphenyl]-4-yl)-7,7-difluoro-4-methylhept-6-en-1-yl)-7-bromoquinazolin-**



**4(3H)-one (3p):** White solid (67%, 70.0 mg); m.p.: 113-114 °C;  $R_f = 0.2$  (EtOAc/petroleum ether = 1:3);  $^1\text{H NMR}$  (400 MHz,  $\text{CDCl}_3$ ):  $\delta = 12.31$  (s, 1H), 8.09 (d,  $J = 8.4$  Hz, 1H), 7.91-7.89 (m, 1H), 7.58-7.53 (m, 5H), 7.45-7.32 (m, 5H), 2.74 (t,  $J = 7.6$  Hz, 2H), 2.51-2.44 (m, 1H), 2.35-2.27 (m, 1H), 1.95-1.81 (m, 2H), 1.63-1.51 (m, 2H), 1.36-1.27 (m, 1H), 0.94 (d,  $J = 6.4$  Hz, 3H);  $^{13}\text{C NMR}$  (100 MHz,  $\text{CDCl}_3$ ):  $\delta = 164.1, 158.1, 154.0$  (dd,  $J = 289.1, 284.4$  Hz), 150.3, 140.4, 139.9, 132.6, 130.0, 129.8, 129.7, 128.8, 128.5 (t,  $J = 3.3$  Hz), 127.5, 127.4, 127.0, 126.9, 119.1, 91.0 (dd,  $J = 21.7, 12.6$  Hz), 35.82, 35.78, 34.7, 30.9, 24.6, 19.0;  $^{19}\text{F NMR}$  (376 MHz,  $\text{CDCl}_3$ )  $\delta = -90.54$  (d,  $J = 43.24$  Hz),  $-90.85$  (d,  $J = 42.86$  Hz) ppm; HRMS (ESI) calcd for  $\text{C}_{28}\text{H}_{26}\text{BrF}_2\text{N}_2\text{O}$   $[\text{M}+\text{H}]^+ 523.1191$ , found 523.1200.

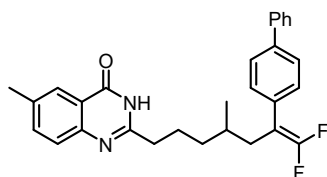

**2-(6-((1,1'-Biphenyl)-4-yl)-7,7-difluoro-4-methylhept-6-en-1-yl)-6-methylquinazolin-**

**4(3H)-one (3q):** White solid (80%, 73.3 mg); m.p.: 142-143°C;  $R_f = 0.2$  (EtOAc/petroleum ether = 1:3);  $^1\text{H NMR}$  (400 MHz,  $\text{CDCl}_3$ ):  $\delta = 12.44$  (s, 1H), 8.10-8.09 (m, 1H), 7.64-7.62 (m, 1H), 7.59-7.52 (m, 5H), 7.44-7.40 (m, 2H), 7.38-7.32 (m, 3H), 2.78 (t,  $J = 7.6$  Hz, 2H), 2.54-2.50 (m, 1H), 2.48 (s, 3H), 2.32-2.26 (m, 1H), 2.01-1.83 (m, 2H), 1.64-1.52 (m, 2H), 1.42-1.32 (m, 1H), 0.95 (d,  $J = 6.4$  Hz, 3H);  $^{13}\text{C NMR}$  (100 MHz,  $\text{CDCl}_3$ ):  $\delta = 164.6, 156.0, 154.0$  (dd,  $J = 289.0, 285.2$  Hz), 147.4, 140.4, 139.9, 136.4, 136.3, 132.6 (t,  $J = 3.2$  Hz), 128.7, 128.5 (t,  $J = 3.3$  Hz), 127.3, 127.0, 126.90, 126.88, 125.5, 120.1, 91.1 (dd,  $J = 21.7, 12.8$  Hz), 36.0, 35.8, 34.6, 30.9, 24.9, 21.1, 19.0;  $^{19}\text{F NMR}$  (376 MHz,  $\text{CDCl}_3$ )  $\delta = -90.62$  (d,  $J = 43.24$  Hz),  $-90.96$  (d,  $J = 43.24$  Hz) ppm; HRMS (ESI) calcd for  $\text{C}_{29}\text{H}_{29}\text{F}_2\text{N}_2\text{O}$   $[\text{M}+\text{H}]^+ 459.2242$ , found 459.2244.

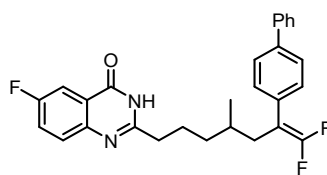

**2-(6-((1,1'-Biphenyl)-4-yl)-7,7-difluoro-4-methylhept-6-en-1-yl)-6-fluoroquinazolin-**

**4(3H)-one (3r):** White solid (75%, 69.3 mg); m.p.: 134-135 °C;  $R_f = 0.2$  (EtOAc/petroleum ether = 1:3);  $^1\text{H NMR}$  (400 MHz,  $\text{CDCl}_3$ ):  $\delta = 12.46$  (s, 1H), 7.91 (dd,  $J = 8.0, 3.2$  Hz, 1H), 7.73-7.70 (m, 1H), 7.58-7.54 (m, 4H), 7.51-7.32 (m, 6H), 2.76 (t,  $J = 8.0$  Hz, 2H), 2.55-2.46 (m, 1H), 2.34-2.28 (m, 1H), 2.05-1.94 (m, 1H), 1.91-1.83 (m, 1H), 1.68-1.52 (m, 2H), 1.41-1.30 (m, 1H), 0.96 (d,  $J = 6.4$  Hz, 3H);  $^{13}\text{C NMR}$  (100 MHz,  $\text{CDCl}_3$ ):  $\delta = 164.1, 160.6$  (d,  $J = 146.6$  Hz), 156.2, 154.1 (dd,  $J = 288.6, 284.9$  Hz), 146.1, 140.5, 140.0, 132.70 (t,  $J = 3.4$  Hz), 129.6 (d,  $J = 8.0$  Hz), 128.8, 128.6 (t,  $J = 3.3$  Hz), 127.4, 127.1, 127.0, 123.5 (d,  $J = 23.9$  Hz),

121.5 (d,  $J = 8.6$  Hz), 110.9 (d,  $J = 23.3$  Hz), 91.1 (dd,  $J = 21.7, 12.7$  Hz), 35.9, 35.8, 34.8, 31.0, 24.8, 19.1;  $^{19}\text{F}$  NMR (376 MHz,  $\text{CDCl}_3$ )  $\delta = -90.59$  (d,  $J = 42.49$  Hz),  $-90.91$  (d,  $J = 43.24$  Hz),  $-112.99$  (s) ppm; HRMS (ESI) calcd for  $\text{C}_{28}\text{H}_{26}\text{F}_3\text{N}_2\text{O}$   $[\text{M}+\text{H}]^+$  463.1992, found 463.2002.

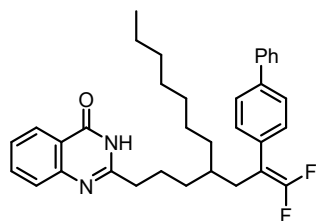

**2-(4-(2-((1,1'-Biphenyl)-4-yl)-3,3-difluoroallyl)undecyl)quinazolin-4(3H)-one (3s):** White solid (88%, 93.0 mg); m.p.: 77-78 °C;  $R_f = 0.2$  (EtOAc/petroleum ether = 1:3);  $^1\text{H}$  NMR (400 MHz,  $\text{CDCl}_3$ ):  $\delta = 12.29$  (s, 1H), 8.30 (d,  $J = 8.0$  Hz, 1H), 7.79-7.70 (m, 2H), 7.57-7.52 (m, 4H), 7.47-7.32 (m, 6H), 2.76 (t,  $J = 7.6$  Hz, 2H), 2.47-2.41 (m, 2H), 1.91-1.85 (m, 2H), 1.49-1.47 (m, 3H), 1.29-1.17 (m, 12H), 0.85 (t,  $J = 6.8$  Hz, 3H);  $^{13}\text{C}$  NMR (100 MHz,  $\text{CDCl}_3$ ):  $\delta = 164.6, 156.8, 153.9$  (dd,  $J = 287.9, J = 286.7$  Hz), 149.4, 140.4, 139.9, 134.8, 132.6, 128.7, 128.6 (t,  $J = 1.7$  Hz), 127.3, 127.2, 127.0, 126.9, 126.3, 126.1, 120.4, 91.2 (dd,  $J = 18.4, 16.8$  Hz), 36.1, 35.4, 32.8, 32.6, 31.8, 29.8, 29.2, 26.1, 24.3, 22.6, 14.0;  $^{19}\text{F}$  NMR (376 MHz,  $\text{CDCl}_3$ )  $\delta = -90.80$  (d,  $J = 43.24$  Hz),  $-90.99$  (d,  $J = 43.99$  Hz) ppm; HRMS (ESI) calcd for  $\text{C}_{34}\text{H}_{39}\text{F}_2\text{N}_2\text{O}$   $[\text{M}+\text{H}]^+$  529.3025, found 529.3038.

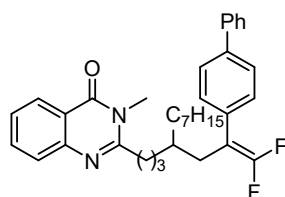

**2-(4-(2-((1,1'-biphenyl)-4-yl)-3,3-difluoroallyl)undecyl)-3-methylquinazolin-4(3H)-one (3t):** White solid (79%, 85.0 mg);  $R_f = 0.2$  (EtOAc/petroleum ether = 1:3);  $^1\text{H}$  NMR (400 MHz,  $\text{CDCl}_3$ ):  $\delta = 8.26$  (d,  $J = 8.0$  Hz, 1H), 7.72-7.68 (m, 1H), 7.63-7.56 (m, 5H), 7.46-7.40 (m, 3H), 7.38-7.33 (m, 3H), 3.56 (s, 3H), 2.72 (t,  $J = 8.0$  Hz, 2H), 2.48-2.38 (m, 2H), 1.86-1.75 (m, 2H), 1.49-1.42 (m, 3H), 1.32-1.24 (s, 12H), 0.88 (t,  $J = 4.4$  Hz, 3H);  $^{13}\text{C}$  NMR (100 MHz,  $\text{CDCl}_3$ ):  $\delta = 162.5, 156.8, 154.0$  (dd,  $J = 287.0, 281.2$  Hz), 147.1, 140.4, 140.0, 134.0, 132.6, 128.8, 128.6 (t,  $J = 3.2$  Hz), 127.4, 127.0, 126.9, 126.8, 126.7, 126.3, 120.1, 91.2 (dd,  $J = 18.2, 15.7$  Hz), 35.7, 35.4, 32.9, 32.5, 31.8, 31.8, 30.3, 29.8, 29.2, 26.2, 23.4, 22.6, 14.1;  $^{19}\text{F}$  NMR (376 MHz,  $\text{CDCl}_3$ )  $\delta = -91.50$  (d,  $J = 42.11$  Hz),  $-91.62$  (d,  $J = 42.49$  Hz) ppm; HRMS (ESI) calcd for  $\text{C}_{35}\text{H}_{41}\text{F}_2\text{N}_2\text{O}$   $[\text{M}+\text{H}]^+$  543.3182, found 543.3187.

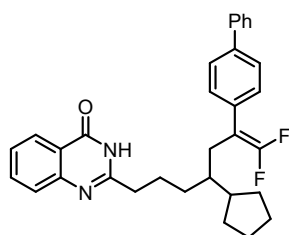

**2-(6-((1,1'-Biphenyl)-4-yl)-4-cyclopentyl-7,7-difluorohept-6-en-1-yl)quinazolin-4(3H)-**

**one (3u):** White solid (68%, 67.8 mg); m.p.: 168-169 °C;  $R_f = 0.2$  (EtOAc/petroleum ether = 1:3);  $^1\text{H NMR}$  (400 MHz,  $\text{CDCl}_3$ ):  $\delta = 11.83$  (s, 1H), 8.29 (dd,  $J = 8.0, 1.2$  Hz, 1H), 7.79-7.70 (m, 2H), 7.56-7.51 (m, 4H), 7.48-7.39 (m, 4H), 7.33 (d,  $J = 7.2$  Hz, 2H), 2.72 (t,  $J = 7.6$  Hz, 2H), 2.58-2.40 (m, 2H), 1.92-1.80 (m, 3H), 1.77-1.71 (m, 3H), 1.57-1.43 (m, 6H), 1.19-1.07 (m, 2H);  $^{13}\text{C NMR}$  (100 MHz,  $\text{CDCl}_3$ ):  $\delta = 164.3, 156.7, 153.8$  (dd,  $J = 292.0, 290.2$  Hz), 149.4, 140.4, 139.9, 134.8, 132.6, 128.7, 128.6, 127.3, 127.2, 127.0, 126.9, 126.3, 126.2, 120.5, 91.5 (dd,  $J = 37.7, 20.8$  Hz), 42.8, 40.0, 36.3, 30.5, 30.2, 30.0, 29.9, 25.3, 23.6;  $^{19}\text{F NMR}$  (376 MHz,  $\text{CDCl}_3$ )  $\delta = -90.87$  (d,  $J = 43.62$  Hz),  $-91.01$  (d,  $J = 44.37$  Hz) ppm; HRMS (ESI) calcd for  $\text{C}_{32}\text{H}_{33}\text{F}_2\text{N}_2\text{O}$   $[\text{M}+\text{H}]^+$  499.2556, found 499.2553.

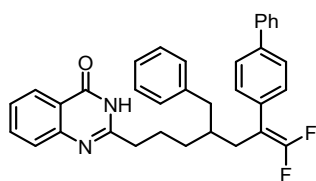

**2-(6-((1,1'-Biphenyl)-4-yl)-4-benzyl-7,7-difluorohept-6-en-1-yl)quinazolin-4(3H)-one**

**(3v):** White solid (80%, 83.2 mg); m.p.: 143-144 °C;  $R_f = 0.2$  (EtOAc/petroleum ether = 1:3);  $^1\text{H NMR}$  (400 MHz,  $\text{CDCl}_3$ ):  $\delta = 12.42$  (s, 1H), 8.27 (dd,  $J = 8.0, 1.2$  Hz, 1H), 7.79-7.72 (m, 2H), 7.58-7.56 (m, 2H), 7.52-7.50 (m, 2H), 7.45-7.42 (m, 3H), 7.37-7.33 (m, 1H), 7.25-7.15 (m, 5H), 7.08-7.05 (m, 2H), 2.76 (t,  $J = 6.8$  Hz, 2H), 2.71-2.66 (m, 1H), 2.63-2.57 (m, 1H), 2.52-2.40 (m, 2H), 2.00-1.92 (m, 2H), 1.81-1.74 (m, 1H), 1.57-1.47 (m, 2H);  $^{13}\text{C NMR}$  (100 MHz,  $\text{CDCl}_3$ ):  $\delta = 164.6, 156.7, 153.9$  (dd,  $J = 285.9, 281.0$  Hz), 149.3, 140.5, 140.4, 139.9, 134.8, 132.1, 129.0, 128.7, 128.5 (t,  $J = 3.3$  Hz), 128.2, 127.3, 127.1, 127.0, 126.9, 126.3, 126.1, 125.8, 120.3, 91.0 (dd,  $J = 18.2, 15.7$  Hz), 39.9, 37.5, 35.8, 32.4, 31.4, 24.2;  $^{19}\text{F NMR}$  (376 MHz,  $\text{CDCl}_3$ )  $\delta = -90.27$  (d,  $J = 45.12$  Hz),  $-90.45$  (d,  $J = 44.74$  Hz); HRMS (ESI) calcd for  $\text{C}_{34}\text{H}_{31}\text{F}_2\text{N}_2\text{O}$   $[\text{M}+\text{H}]^+$  521.2399, found 521.2415.

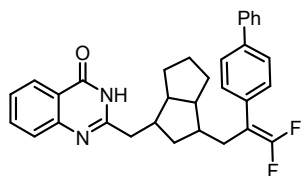

**2-(3-(3-((1,1'-Biphenyl)-4-yl)-4,4-difluorobut-3-en-1-yl)octahydro-pentalen-1-yl)quinazol**

**in-4(3H)-one (3w):** White solid (77%, 76.4 mg); m.p.: 81-82 °C;  $R_f = 0.2$  (EtOAc/petroleum ether = 1:3, dr = 1:1.5);  $^1\text{H NMR}$  (400 MHz,  $\text{CDCl}_3$ ):  $\delta = 12.25$  (s, 0.6H), 12.23 (s, 0.4H), 8.25 (dd,  $J = 8.4, 1.6$  Hz, 1H), 7.75-7.67 (m, 2H), 7.57-7.51 (m, 4H), 7.46-7.41 (m, 3H), 7.35-7.32 (m, 3H), 2.95-2.90 (m, 1H), 2.74-2.68 (m, 1H), 2.55-2.50 (m, 1H), 2.46-2.41 (m, 1H), 2.30-2.23 (m, 1H), 2.18-2.11 (m, 1H), 1.97-1.82 (m, 2H), 1.52-1.44 (m, 5H), 1.36-1.27 (m, 2H),

1.16-1.07 (m, 1H);  $^{13}\text{C}$  NMR (100 MHz,  $\text{CDCl}_3$ ):  $\delta = 164.4, 156.4, 153.9$  (dd,  $J = 290.3, 285.5$  Hz), 149.5, 140.4, 139.8, 134.7, 132.7 (t,  $J = 3.9$  Hz), 128.7, 128.4 (t,  $J = 3.7$  Hz), 127.3, 127.2, 127.0, 126.9, 126.3, 126.1, 120.4, 91.6 (dd,  $J = 22.0, 11.8$  Hz), 50.3, 49.8, 45.34, 45.31, 41.4, 40.7, 33.1, 32.4, 31.7, 25.4;  $^{19}\text{F}$  NMR (376 MHz,  $\text{CDCl}_3$ )  $\delta = -90.43$  (d,  $J = 42.86$  Hz),  $-91.11$  (d,  $J = 42.11$  Hz) ppm; HRMS (ESI) calcd for  $\text{C}_{32}\text{H}_{31}\text{F}_2\text{N}_2\text{O}$   $[\text{M}+\text{H}]^+$  497.2399, found 497.2399.

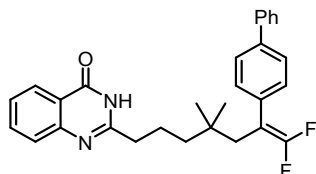

**2-(6-([1,1'-Biphenyl]-4-yl)-7,7-difluoro-4,4-dimethylhept-6-en-1-yl)quinazolin-4(3H)-one**

**(3x):** White solid (92%, 84.3 mg); m.p.: 125-126 °C;  $R_f = 0.2$  (EtOAc/petroleum ether = 1:3);  $^1\text{H}$  NMR (400 MHz,  $\text{CDCl}_3$ ):  $\delta = 11.98$  (s, 1H), 8.28 (dd,  $J = 8.0, 1.6$  Hz, 1H), 7.77-7.73 (m, 1H), 7.69 (d,  $J = 6.8$  Hz, 1H), 7.58-7.53 (m, 4H), 7.47-7.43 (m, 1H), 7.42-7.36 (m, 4H), 7.34-7.30 (m, 1H), 2.62 (t,  $J = 8.0$  Hz, 2H), 2.42 (t,  $J = 2.4$  Hz, 2H), 1.86-1.78 (m, 2H), 1.37-1.33 (m, 2H), 0.83 (s, 6H);  $^{13}\text{C}$  NMR (100 MHz,  $\text{CDCl}_3$ ):  $\delta = 164.2, 156.6, 154.4$  (dd,  $J = 288.1, 285.5$  Hz), 149.4, 140.4, 139.8, 134.7, 134.5, 134.4, 128.9, 128.8 (t,  $J = 2.8$  Hz), 127.3, 127.2, 126.9, 126.3, 126.1, 120.5, 90.4 (dd,  $J = 21.5, 13.2$  Hz), 41.9, 39.3, 36.4, 35.3, 27.1, 22.2;  $^{19}\text{F}$  NMR (376 MHz,  $\text{CDCl}_3$ )  $\delta = -88.85$  (d,  $J = 39.48$  Hz),  $-91.34$  (d,  $J = 40.98$  Hz) ppm; HRMS (ESI) calcd for  $\text{C}_{29}\text{H}_{29}\text{F}_2\text{N}_2\text{O}$   $[\text{M}+\text{H}]^+$  459.2242, found 459.2247.

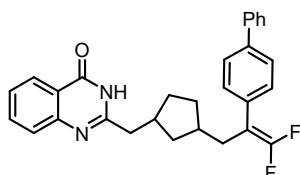

**2-(3-(2-([1,1'-Biphenyl]-4-yl)-3,3-difluoroallyl)cyclohexyl)quinazolin-4(3H)-one**

**(3y):** White solid (75%, 68.4 mg); m.p.: 140-141 °C;  $R_f = 0.2$  (EtOAc/petroleum ether = 1:3, dr = 1:1);  $^1\text{H}$  NMR (400 MHz,  $\text{CDCl}_3$ ):  $\delta = 12.34$  (s, 1H), 8.29 (d,  $J = 8.0$  Hz, 1H), 7.77-7.71 (m, 2H), 7.61-7.55 (m, 4H), 7.47-7.42 (m, 3H), 7.38-7.33 (m, 3H), 2.85-2.77 (m, 2H), 2.73-2.39 (m, 3H), 2.16-1.48 (m, 5H), 1.41-1.04 (m, 2H).  $^{13}\text{C}$  NMR (100 MHz,  $\text{CDCl}_3$ ):  $\delta = 164.5, 156.39, 156.36, 153.94$  (dd,  $J = 288.6, 284.9$  Hz), 153.91 (dd,  $J = 288.1, 284.6$  Hz), 149.44, 149.42, 140.5, 139.9, 134.7, 132.6, 128.7, 128.6, 127.3, 127.2, 127.0, 126.9, 126.3, 126.1, 120.4, 91.73 (dd,  $J = 21.6, 12.6$  Hz), 91.71 (dd,  $J = 21.1, 13.2$  Hz), 41.9, 41.8, 39.4, 38.5, 38.1, 37.5, 37.3, 36.8, 33.8, 33.7, 32.3, 32.0, 31.0, 30.8;  $^{19}\text{F}$  NMR (376 MHz,  $\text{CDCl}_3$ )  $\delta = -91.01$  (d,  $J = 14.66$  Hz),  $-91.13$  (d,  $J = 14.29$  Hz),  $-91.34$  (d,  $J = 15.04$  Hz),  $-91.46$  (d,  $J = 14.29$  Hz) ppm; HRMS (ESI) calcd for  $\text{C}_{29}\text{H}_{27}\text{F}_2\text{N}_2\text{O}$   $[\text{M}+\text{H}]^+$  457.2086, found 457.2084.

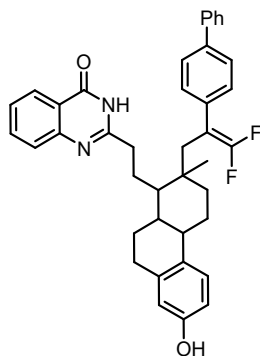

**2-(2-(2-(2-((1,1'-Biphenyl)-4-yl)-3,3-difluoroallyl)-7-hydroxy-2-methyl-1,2,3,4,4a,9,10,10a-octahydrophenanthren-1-yl)ethyl)quinazolin-4(3H)-one (3z):** White solid (68%, 83.8 mg); m.p.: 198-199 °C;  $R_f = 0.2$  (EtOAc/petroleum ether = 1:1, dr = 1:4);  $^1\text{H NMR}$  (400 MHz, DMSO- $d_6$ ):  $\delta = 12.38$  (s, 0.8H), 12.36 (s, 0.2H), 9.08 (s, 0.2 H), 9.05 (s, 0.8 H), 8.16-8.10 (m, 1H), 7.79-7.72 (m, 1H), 7.71-7.67 (m, 1H), 7.64-7.59 (m, 4H), 7.46-7.40 (m, 5H), 7.34-7.30 (m, 1H), 6.98-6.94 (m, 1H), 6.54-6.45 (m, 2H), 2.86-2.57 (m, 5H), 2.20-1.92 (m, 5H), 1.61-1.42 (m, 2H), 1.25-0.97 (m, 5H), 0.68 (s, 0.6 H), 0.60 (s, 2.4 H);  $^{13}\text{C NMR}$  (100 MHz, DMSO- $d_6$ ):  $\delta = 162.2, 157.7, 157.5, 155.1, 153.8$  (dd,  $J = 286.3, 285.2$  Hz), 149.24, 149.20, 139.55, 139.50, 139.0, 137.2, 134.4, 130.4, 130.3, 129.1, 129.0, 127.7, 127.0, 126.72, 126.67, 126.6, 126.4, 126.1, 125.9, 121.1, 121.0, 114.8, 113.0, 90.5 (dd,  $J = 20.9, 12.2$  Hz), 52.2, 50.4, 43.3, 43.0, 41.9, 41.4, 38.6, 38.3, 37.0, 36.6, 30.1, 27.4, 27.1, 26.8, 26.5, 26.4, 26.2, 17.7;  $^{19}\text{F NMR}$  (376 MHz, DMSO- $d_6$ )  $\delta = -89.19$  (d,  $J = 42.49$  Hz),  $-89.93$  (d,  $J = 43.24$  Hz),  $-91.52$  (d,  $J = 42.86$  Hz),  $-91.65$  (d,  $J = 42.86$  Hz) ppm; HRMS (ESI) calcd for  $\text{C}_{40}\text{H}_{39}\text{F}_2\text{N}_2\text{O}$   $[\text{M}+\text{H}]^+$  617.2974, found 617.2972.

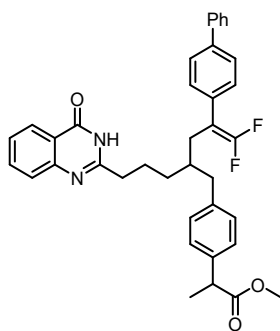

**Methyl 2-(4-(4-((1,1'-biphenyl)-4-yl)-5,5-difluoro-2-(3-(4-oxo-3,4-dihydroquinazolin-2-yl)prop-1-en-1-yl)phenyl)propanoate (3za):** White solid (67%, 81.2 mg); m.p.: 180-181 °C;  $R_f = 0.2$  (EtOAc/petroleum ether = 1:3, dr = 1:1);  $^1\text{H NMR}$  (400 MHz,  $\text{CDCl}_3$ ):  $\delta = 12.46$  (s, 1H), 8.28 (d,  $J = 8.0$  Hz, 1H), 7.79-7.71 (m, 2H), 7.56 (d,  $J = 7.6$  Hz, 2H), 7.49 (d,  $J = 8.4$  Hz, 2H), 7.45-7.41 (m, 3H), 7.36-7.32 (m, 1H), 7.22-7.15 (m, 4H), 7.02 (d,  $J = 8.0$  Hz, 2H), 3.72-3.67 (m, 1H), 3.65 (s, 3H), 2.76 (t,  $J = 7.6$  Hz, 2H), 2.68-2.39 (m, 4H), 2.00-1.91 (m, 2H), 1.80-1.72 (m, 1H), 1.54-1.46 (m, 5H);  $^{13}\text{C NMR}$  (100 MHz,  $\text{CDCl}_3$ ):  $\delta = 175.1, 164.5, 156.7, 153.9$  (dd,  $J = 298.1, 294.9$  Hz), 149.2, 140.3, 139.9, 139.4, 138.10, 138.07, 134.8, 132.1,

129.3, 128.7, 128.5(t,  $J = 3.3$  Hz), 127.33, 127.26, 127.1, 126.95, 126.88, 126.4, 126.1, 120.3, 91.0 (dd,  $J = 20.4, 13.5$  Hz), 51.9, 44.9, 39.5, 37.5, 35.8, 32.6, 31.4, 24.2, 18.55, 18.47;  $^{19}\text{F}$  NMR (376 MHz,  $\text{CDCl}_3$ )  $\delta = -90.00$  (d,  $J = 42.86$  Hz),  $-90.18$  (d,  $J = 43.24$  Hz) ppm; HRMS (ESI) calcd for  $\text{C}_{38}\text{H}_{37}\text{F}_2\text{N}_2\text{O}_3$   $[\text{M}+\text{H}]^+$  607.2767, found 607.2759.

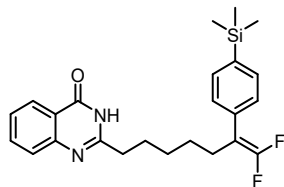

**2-(7,7-Difluoro-6-(4-(trimethylsilyl)phenyl)hept-6-en-1-yl)quinazolin-4(3H)-one (4a):**

White solid (58%, 47.7 mg); m.p.: 114-115 °C;  $R_f = 0.2$  (EtOAc/petroleum ether = 1:3);  $^1\text{H}$  NMR (400 MHz,  $\text{CDCl}_3$ ):  $\delta = 12.27$  (s, 1H), 8.28 (dd,  $J = 7.6, 1.2$  Hz, 1H), 7.80-7.76 (m, 1H), 7.71 (d,  $J = 7.2$  Hz, 1H), 7.49-7.44 (m, 3H), 7.27 (d,  $J = 7.6$  Hz, 2H), 2.80 (t,  $J = 7.6$  Hz, 2H), 2.45-2.41 (m, 2H), 1.92-1.86 (m, 2H), 1.50-1.47 (m, 4H), 0.26 (s, 9H);  $^{13}\text{C}$  NMR (100 MHz,  $\text{CDCl}_3$ ):  $\delta = 164.5, 156.9, 153.6$  (dd,  $J = 289.1, 286.6$  Hz), 149.3, 139.4, 134.8, 134.0, 133.4, 127.4 (t,  $J = 2.7$  Hz), 126.4, 126.1, 120.4, 92.2 (dd,  $J = 20.4, 13.4$  Hz), 35.7, 28.6, 27.41, 27.35, 27.2, -1.2;  $^{19}\text{F}$  NMR (376 MHz,  $\text{CDCl}_3$ )  $\delta = -93.07$  (d,  $J = 44.37$  Hz),  $-93.26$  (d,  $J = 43.62$  Hz) ppm; HRMS (ESI) calcd for  $\text{C}_{24}\text{H}_{29}\text{F}_2\text{N}_2\text{OSi}$   $[\text{M}+\text{H}]^+$  427.2012, found 427.2022.

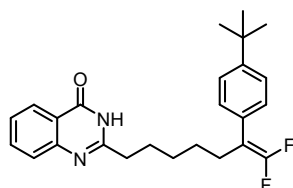

**2-(6-(4-(Tert-butyl)phenyl)-7,7-difluorohept-6-en-1-yl)quinazolin-4(3H)-one (4b):** White solid (62%, 50.9 mg); m.p.: 112-113 °C;  $R_f = 0.2$  (EtOAc/petroleum ether = 1:3);  $^1\text{H}$  NMR (400 MHz,  $\text{CDCl}_3$ ):  $\delta = 12.24$  (s, 1H), 8.28 (d,  $J = 8.0$  Hz, 1H), 7.79-7.75 (m, 1H), 7.70 (d,  $J = 8.4$  Hz, 1H), 7.48-7.44 (m, 1H), 7.34 (d,  $J = 8.4$  Hz, 2H), 7.22 (d,  $J = 8.4$  Hz, 2H), 2.79 (t,  $J = 7.6$  Hz, 2H), 2.43-2.38 (m, 2H), 1.92-1.85 (m, 2H), 1.53-1.46 (m, 4H), 1.30 (s, 9H);  $^{13}\text{C}$  NMR (100 MHz,  $\text{CDCl}_3$ ):  $\delta = 164.5, 156.8, 153.6$  (dd,  $J = 287.5, 286.0$  Hz), 150.0, 149.5, 134.8, 130.5, 127.7 (t,  $J = 3.2$  Hz), 127.2, 126.3, 126.1, 125.3, 120.4, 91.9 (dd,  $J = 19.4, 14.8$  Hz), 35.7, 34.4, 31.2, 28.6, 27.43, 27.40, 27.2;  $^{19}\text{F}$  NMR (376 MHz,  $\text{CDCl}_3$ )  $\delta = -93.63$  (d,  $J = 46.62$  Hz),  $-93.80$  (d,  $J = 45.87$  Hz) ppm; HRMS (ESI) calcd for  $\text{C}_{25}\text{H}_{29}\text{F}_2\text{N}_2\text{O}$   $[\text{M}+\text{H}]^+$  411.2243, found 411.2246.

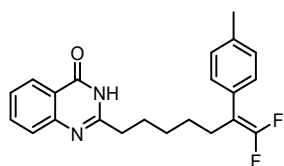

**2-(7,7-Difluoro-6-(p-tolyl)hept-6-en-1-yl)quinazolin-4(3H)-one (4c):** White solid (56%, 41.2 mg); m.p.: 151-152 °C;  $R_f = 0.2$  (EtOAc/petroleum ether = 1:3);  $^1\text{H}$  NMR (400 MHz,

CDCl<sub>3</sub>):  $\delta$  = 11.90 (s, 1H), 8.26 (d,  $J$  = 7.6 Hz, 1H), 7.80-7.75 (m, 1H), 7.70 (d,  $J$  = 8.0 Hz, 1H), 7.48-7.44 (m, 1H), 7.18-7.11 (m, 4H), 2.76 (t,  $J$  = 7.6 Hz, 2H), 2.44-2.38 (m, 2H), 2.32 (s, 3H), 1.91-1.84 (m, 2H), 1.50-1.44 (m, 4H); <sup>13</sup>C NMR (100 MHz, CDCl<sub>3</sub>):  $\delta$  = 164.3, 156.7, 153.5 (dd,  $J$  = 288.2, 285.6 Hz), 149.4, 136.9, 134.8, 130.6, 129.1, 128.0 (t,  $J$  = 2.6 Hz), 127.2, 126.4, 126.2, 120.4, 92.0 (dd,  $J$  = 19.8, 16.9 Hz), 35.8, 28.5, 27.4, 27.3, 27.2, 21.1; <sup>19</sup>F NMR (376 MHz, CDCl<sub>3</sub>)  $\delta$  = -92.02 (d,  $J$  = 45.12 Hz), -92.15 (d,  $J$  = 45.12 Hz) ppm; HRMS (ESI) calcd for C<sub>22</sub>H<sub>23</sub>F<sub>2</sub>N<sub>2</sub>O [M+H]<sup>+</sup> 369.1773, found 369.1774.

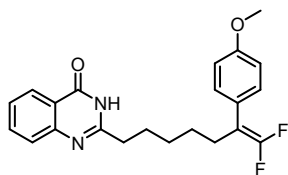

**2-(7,7-Difluoro-6-(4-methoxyphenyl)hept-6-en-1-yl)quinazolin-4(3H)-one (4d):** White solid (65%, 49.9 mg); m.p.: 132-133 °C;  $R_f = 0.2$  (EtOAc/petroleum ether = 1:3);  $^1\text{H NMR}$  (400 MHz,  $\text{CDCl}_3$ ):  $\delta = 12.14$  (s, 1H), 8.26 (dd,  $J = 8.0, 1.6$  Hz, 1H), 7.79-7.75 (m, 1H), 7.70 (d,  $J = 7.2$  Hz, 1H), 7.48-7.44 (m, 1H), 7.21-7.19 (m, 2H), 6.87-6.84 (m, 2H), 3.78 (s, 3H), 2.77 (t,  $J = 7.6$  Hz, 2H), 2.41-2.36 (m, 2H), 1.91-1.83 (m, 2H), 1.49-1.44 (m, 4H);  $^{13}\text{C NMR}$  (100 MHz,  $\text{CDCl}_3$ ):  $\delta = 164.4, 158.6, 156.8, 153.4$  (dd,  $J = 287.3, 285.7$  Hz), 149.4, 134.8, 129.3 (t,  $J = 3.1$  Hz), 127.2, 126.3, 126.1, 125.7, 120.4, 113.8, 91.6 (dd,  $J = 17.8, 16.7$  Hz), 55.2, 35.7, 28.5, 27.5, 27.3, 27.2;  $^{19}\text{F NMR}$  (376 MHz,  $\text{CDCl}_3$ )  $\delta = -92.53$  (d,  $J = 45.50$  Hz),  $-92.66$  (d,  $J = 44.37$  Hz) ppm; HRMS (ESI) calcd for  $\text{C}_{22}\text{H}_{23}\text{F}_2\text{N}_2\text{O}_2$   $[\text{M}+\text{H}]^+$  385.1722, found 385.1714.

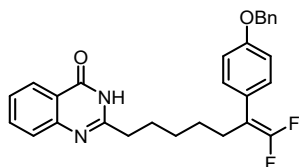

**2-(6-(4-(Benzyloxy)phenyl)-7,7-difluorohept-6-en-1-yl)quinazolin-4(3H)-one (4e):** White solid (66%, 60.7 mg); m.p.: 147-148 °C;  $R_f = 0.2$  (EtOAc/petroleum ether = 1:3);  $^1\text{H NMR}$  (400 MHz,  $\text{CDCl}_3$ ):  $\delta = 11.97$  (s, 1H), 8.27 (d,  $J = 7.6$  Hz, 1H), 7.79-7.71 (m, 2H), 7.49-7.33 (m, 6H), 7.23-7.19 (m, 2H), 7.00-6.92 (m, 2H), 5.04 (s, 2H), 2.78 (t,  $J = 7.6$  Hz, 2H), 2.47-2.37 (m, 2H), 1.96-1.85 (m, 2H), 1.60-1.44 (m, 4H);  $^{13}\text{C NMR}$  (100 MHz,  $\text{CDCl}_3$ ):  $\delta = 164.2, 157.8, 157.0, 156.9, 153.4$  (dd,  $J = 286.2, 284.4$  Hz), 136.8, 134.9, 129.3 (t,  $J = 3.2$  Hz), 128.6, 128.0, 127.5, 126.9, 126.5, 126.2, 126.0, 120.3, 114.7, 91.6 (dd,  $J = 18.2, 16.5$  Hz), 70.0, 35.6, 28.5, 27.5, 27.3, 27.2;  $^{19}\text{F NMR}$  (376 MHz,  $\text{CDCl}_3$ )  $\delta = -92.63$  (d,  $J = 46.25$  Hz),  $-92.76$  (d,  $J = 45.87$  Hz) ppm; HRMS (ESI) calcd for  $\text{C}_{28}\text{H}_{27}\text{F}_2\text{N}_2\text{O}_2$   $[\text{M}+\text{H}]^+$  461.2035, found 461.2021.

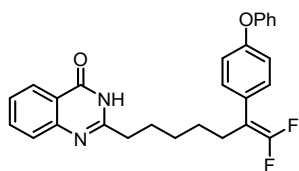

**2-(7,7-Difluoro-6-(4-phenoxyphenyl)hept-6-en-1-yl)quinazolin-4(3H)-one (4f):** White solid (60%, 53.5 mg); m.p.: 137-138 °C;  $R_f = 0.2$  (EtOAc/petroleum ether = 1:3);  $^1\text{H NMR}$  (400 MHz,  $\text{CDCl}_3$ ):  $\delta = 12.36$  (s, 1H), 8.27 (dd,  $J = 8.0, 1.6$  Hz, 1H), 7.79-7.70 (m, 2H), 7.47-7.43 (m, 1H), 7.36-7.32 (m, 2H), 7.27-7.23 (m, 2H), 7.13-7.09 (m, 1H), 7.04-7.01 (m, 2H), 6.96-6.94 (m, 2H), 2.80 (t,  $J = 7.6$  Hz, 2H), 2.44-2.39 (m, 2H), 1.94-1.86 (m, 2H), 1.55-1.48 (m, 4H);  $^{13}\text{C NMR}$



NMR (100 MHz, CDCl<sub>3</sub>):  $\delta$  = 164.6, 156.8, 156.7, 156.4, 153.5 (dd,  $J$  = 286.9, 285.5 Hz), 149.4, 134.8, 129.7, 129.5 (t,  $J$  = 3.4 Hz), 128.2, 127.1, 126.3, 126.1, 123.4, 120.3, 119.1, 118.4, 91.6 (dd,  $J$  = 19.2, 15.6 Hz), 35.6, 28.5, 27.5, 27.3, 27.1; <sup>19</sup>F NMR (376 MHz, CDCl<sub>3</sub>)  $\delta$  = -93.42 (d,  $J$  = 47.75 Hz), -93.57 (d,  $J$  = 48.50 Hz) ppm; HRMS (ESI) calcd for C<sub>27</sub>H<sub>25</sub>F<sub>2</sub>N<sub>2</sub>O<sub>2</sub> [M+H]<sup>+</sup> 447.1879, found 447.1893.

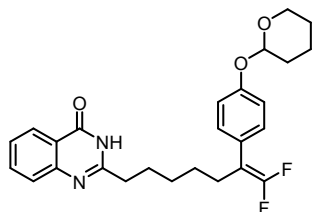

**2-(7,7-Difluoro-6-(4-((tetrahydro-2H-pyran-2-yl)oxy)phenyl)hept-6-en-1-yl)quinazolin-4(3H)-one (4g):** White solid (61%, 55.4 mg); m.p.: 149-150 °C;  $R_f$  = 0.2 (EtOAc/petroleum ether = 1:3); <sup>1</sup>H NMR (400 MHz, CDCl<sub>3</sub>):  $\delta$  = 12.06 (s, 1H), 8.26 (dd,  $J$  = 8.0, 1.6 Hz, 1H), 7.79-7.75 (m, 1H), 7.69 (d,  $J$  = 7.2 Hz, 1H), 7.48-7.44 (m, 1H), 7.20-7.18 (m, 2H), 7.02-6.98 (m, 2H), 5.39 (t,  $J$  = 3.2 Hz, 1H), 3.92-3.86 (m, 1H), 3.62-3.57 (m, 1H), 2.76 (t,  $J$  = 7.6 Hz, 2H), 2.40-2.36 (m, 2H), 2.04-1.93 (m, 1H), 1.88-1.82 (m, 4H), 1.70-1.59 (m, 3H), 1.49-1.43 (m, 4H); <sup>13</sup>C NMR (100 MHz, CDCl<sub>3</sub>):  $\delta$  = 164.4, 156.8, 156.1, 153.4 (dd,  $J$  = 287.8, 285.9 Hz), 149.4, 134.8, 129.2 (t,  $J$  = 3.0 Hz), 127.2, 126.6, 126.3, 126.1, 120.4, 116.3, 96.3, 91.7 (dd,  $J$  = 18.4, 16.6 Hz), 62.0, 35.7, 30.3, 28.5, 27.5, 27.3, 27.2, 25.1, 18.7; <sup>19</sup>F NMR (376 MHz, CDCl<sub>3</sub>)  $\delta$  = -92.39 (d,  $J$  = 45.87 Hz), -92.52 (d,  $J$  = 45.87 Hz) ppm; HRMS (ESI) calcd for C<sub>26</sub>H<sub>29</sub>F<sub>2</sub>N<sub>2</sub>O<sub>3</sub> [M+H]<sup>+</sup> 455.2141, found 455.2120.

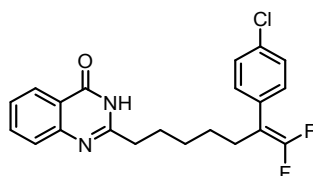

**2-(6-(4-Chlorophenyl)-7,7-difluorohept-6-en-1-yl)quinazolin-4(3H)-one (4h):** White solid (59%, 45.8 mg); m.p.: 154-155 °C;  $R_f$  = 0.2 (EtOAc/petroleum ether = 1:3); <sup>1</sup>H NMR (400 MHz, CDCl<sub>3</sub>):  $\delta$  = 12.13 (s, 1H), 8.25 (dd,  $J$  = 8.0, 1.2 Hz, 1H), 7.80-7.76 (m, 1H), 7.70 (d,  $J$  = 7.2 Hz, 1H), 7.48-7.44 (m, 1H), 7.29-7.26 (m, 2H), 7.22-7.19 (m, 2H), 2.77 (t,  $J$  = 7.6 Hz, 2H), 2.42-2.36 (m, 2H), 1.91-1.83 (m, 2H), 1.50-1.42 (m, 4H); <sup>13</sup>C NMR (100 MHz, CDCl<sub>3</sub>):  $\delta$  = 164.5, 156.7, 153.5 (dd,  $J$  = 288.3, 285.7 Hz), 149.4, 134.8, 133.0, 132.0, 129.5 (t,  $J$  = 2.7 Hz), 128.6, 127.2, 126.4, 126.1, 120.4, 91.4 (dd,  $J$  = 21.0, 13.5 Hz), 35.6, 28.4, 27.3, 27.2, 27.1; <sup>19</sup>F NMR (376 MHz, CDCl<sub>3</sub>)  $\delta$  = -90.69 (d,  $J$  = 42.86 Hz), -90.87 (d,  $J$  = 43.24 Hz) ppm; HRMS (ESI) calcd for C<sub>21</sub>H<sub>20</sub>ClF<sub>2</sub>N<sub>2</sub>O [M+H]<sup>+</sup> 389.1227, found 389.1239.

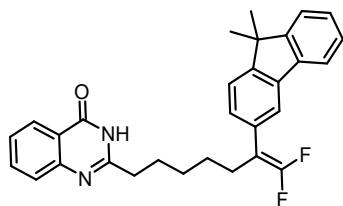

**2-(6-(9,9-Dimethyl-9H-fluoren-3-yl)-7,7-difluorohept-6-en-1-yl)quinazolin-4(3H)-one**

**(4i):** White solid (70%, 65.8 mg); m.p.: 90-91 °C;  $R_f$  = 0.2 (EtOAc/petroleum ether = 1:3);  $^1\text{H}$  NMR (400 MHz,  $\text{CDCl}_3$ ):  $\delta$  = 12.21 (s, 1H), 8.27 (dd,  $J$  = 8.0, 1.6 Hz, 1H), 7.77-7.72 (m, 1H), 7.70-7.68 (m, 2H), 7.65 (d,  $J$  = 8.0 Hz, 1H), 7.45-7.40 (m, 2H), 7.36-7.35 (m, 1H), 7.33-7.30 (m, 2H), 7.27-7.25 (m, 1H), 2.79 (t,  $J$  = 7.2 Hz, 2H), 2.52-2.47 (m, 2H), 1.93-1.86 (m, 2H), 1.54-1.51 (m, 4H), 1.46 (s, 6H);  $^{13}\text{C}$  NMR (100 MHz,  $\text{CDCl}_3$ ):  $\delta$  = 164.6, 156.9, 153.9, 153.83, 153.77 (dd,  $J$  = 288.8, 285.6 Hz), 149.6, 138.8, 138.5, 134.9, 132.7 (t,  $J$  = 3.0 Hz), 127.4, 127.3, 127.13, 127.09, 126.5, 126.2, 122.7, 122.5 (t,  $J$  = 4.2 Hz), 120.5, 120.1, 120.0, 92.8 (dd,  $J$  = 20.6, 13.4 Hz), 46.9, 35.8, 28.7, 27.8, 27.5, 27.25, 27.20;  $^{19}\text{F}$  NMR (376 MHz,  $\text{CDCl}_3$ )  $\delta$  = -91.25 (d,  $J$  = 45.12 Hz), -91.45 (d,  $J$  = 43.99 Hz) ppm; HRMS (ESI) calcd for  $\text{C}_{30}\text{H}_{29}\text{F}_2\text{N}_2\text{O}$   $[\text{M}+\text{H}]^+$  471.2243, found 471.2240.

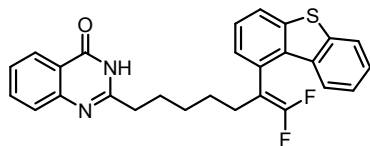

**2-(6-(Dibenzo[b,d]thiophen-1-yl)-7,7-difluorohept-6-en-1-yl)quinazolin-4(3H)-one (4j):**

White solid (74%, 68.1 mg); m.p.: 101-102 °C;  $R_f$  = 0.2 (EtOAc/petroleum ether = 1:3);  $^1\text{H}$  NMR (400 MHz,  $\text{DMSO}-d_6$ ):  $\delta$  = 12.14 (s, 1H), 8.36-8.32 (m, 2H), 8.08 (dd,  $J$  = 8.0, 1.6 Hz, 1H), 7.97-7.95 (m, 1H), 7.75-7.71 (m, 1H), 7.56-7.48 (m, 4H), 7.45-7.40 (m, 2H), 2.53 (t,  $J$  = 7.6 Hz, 2H), 2.48-2.45 (m, 2H), 1.68-1.60 (m, 2H), 1.36-1.26 (m, 4H);  $^{13}\text{C}$  NMR (100 MHz,  $\text{DMSO}-d_6$ ):  $\delta$  = 161.9, 157.4, 152.4 (dd,  $J$  = 287.6, 284.2 Hz), 149.1, 139.0, 138.2, 135.6, 135.3, 134.3, 128.0 (t,  $J$  = 3.4 Hz), 127.6, 127.5, 126.9, 126.0, 125.8, 125.3, 125.0, 123.0, 122.4, 121.8, 120.9, 91.7 (dd,  $J$  = 23.1, 14.8 Hz), 34.4, 27.8, 27.4, 26.8, 26.4;  $^{19}\text{F}$  NMR (376 MHz,  $\text{DMSO}-d_6$ )  $\delta$  = -87.03 (d,  $J$  = 39.48 Hz), -91.74 (d,  $J$  = 38.73 Hz) ppm; HRMS (ESI) calcd for  $\text{C}_{27}\text{H}_{23}\text{F}_2\text{N}_2\text{OS}$   $[\text{M}+\text{H}]^+$  461.1494, found 461.1509.

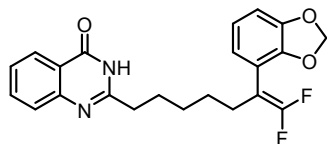

**2-(6-(Benzo[d][1,3]dioxol-4-yl)-7,7-difluorohept-6-en-1-yl)quinazolin-4(3H)-one (4k):**

White solid (49%, 39.0 mg); m.p.: 131-132 °C;  $R_f$  = 0.2 (EtOAc/petroleum ether = 1:3);  $^1\text{H}$  NMR (400 MHz,  $\text{CDCl}_3$ ):  $\delta$  = 12.20 (s, 1H), 8.26 (dd,  $J$  = 8.0, 1.6 Hz, 1H), 7.80-7.75 (m, 1H), 7.71 (d,  $J$  = 8.0 Hz, 1H), 7.49-7.44 (m, 1H), 6.76-6.71 (m, 3H), 5.93 (s, 2H), 2.79 (t,  $J$  = 7.2

Hz, 2H), 2.38-2.33 (m, 2H), 1.92-1.84 (m, 2H), 1.51-1.44 (m, 4H);  $^{13}\text{C}$  NMR (100 MHz,  $\text{CDCl}_3$ ):  $\delta$  = 164.4, 157.0, 153.4 (dd,  $J$  = 288.4, 284.6 Hz), 149.1, 147.6, 146.6, 134.9, 127.2 (t,  $J$  = 3.2 Hz), 127.0, 126.4, 126.1, 121.7, 120.3, 108.7 (t,  $J$  = 3.8 Hz), 108.2, 101.0, 91.9 (dd,  $J$  = 21.9, 11.9 Hz), 35.5, 28.4, 27.7, 27.20, 27.16;  $^{19}\text{F}$  NMR (376 MHz,  $\text{CDCl}_3$ )  $\delta$  = -91.90 (d,  $J$  = 45.50 Hz), -92.25 (d,  $J$  = 45.87 Hz) ppm; HRMS (ESI) calcd for  $\text{C}_{22}\text{H}_{21}\text{F}_2\text{N}_2\text{O}_3$   $[\text{M}+\text{H}]^+$  399.1515, found 399.1536.

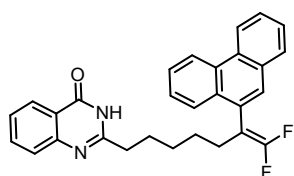

**2-(7,7-Difluoro-6-(phenanthren-9-yl)hept-6-en-1-yl)quinazolin-4(3H)-one (4l):** White solid (39 %, 35.4 mg); m.p.: 73-74 °C;  $R_f$  = 0.2 (EtOAc/petroleum ether = 1:2);  $^1\text{H}$  NMR (400 MHz,  $\text{CDCl}_3$ ):  $\delta$  = 12.15 (s, 1H), 8.72 (d,  $J$  = 8.0 Hz, 1H), 8.66 (d,  $J$  = 8.4 Hz, 1H), 8.24 (d,  $J$  = 8.0 Hz, 1H), 7.92 (d,  $J$  = 8.4 Hz, 1H), 7.82 (d,  $J$  = 8.0 Hz, 1H), 7.75-7.71 (m, 1H), 7.69-7.63 (m, 3H), 7.61-7.55 (m, 3H), 7.41-7.37 (m, 1H), 2.75 (t,  $J$  = 8.4 Hz, 2H), 2.65-2.39 (m, 2H), 1.89-1.82 (m, 2H), 1.55-1.48 (m, 4H);  $^{13}\text{C}$  NMR (100 MHz,  $\text{CDCl}_3$ ):  $\delta$  = 164.4, 156.7, 153.5 (dd,  $J$  = 287.7, 286.4 Hz), 149.4, 134.7, 131.2, 130.7, 130.5, 130.1, 129.81, 129.76, 128.5, 128.3, 127.1, 126.9, 126.8, 126.6, 126.3, 126.1, 125.6, 123.1, 122.5, 120.4, 90.4 (dd,  $J$  = 22.1, 16.6 Hz), 35.7, 29.0, 28.7, 27.4, 27.1;  $^{19}\text{F}$  NMR (376 MHz,  $\text{CDCl}_3$ )  $\delta$  = -88.56 (d,  $J$  = 43.62 Hz), -92.95 (d,  $J$  = 43.62 Hz) ppm; HRMS (ESI) calcd for  $\text{C}_{29}\text{H}_{25}\text{F}_2\text{N}_2\text{O}$   $[\text{M}+\text{H}]^+$  455.1930, found 455.1946.

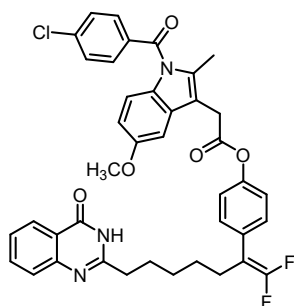

**2-(6-(4-(3-(1-(4-chlorobenzoyl)-5-methoxy-2-methyl-1H-indol-3-yl)-2-oxopropoxy)phenyl)-7,7-difluorohept-6-en-1-yl)quinazolin-4(3H)-one (4m):** White solid (39%, 56.4 mg); m.p.: 146-147 °C;  $R_f$  = 0.2 (EtOAc/petroleum ether = 1:3);  $^1\text{H}$  NMR (400 MHz,  $\text{CDCl}_3$ ):  $\delta$  = 11.66 (s, 1H), 8.48 (d,  $J$  = 8.4 Hz, 1H), 8.01-7.96 (m, 1H), 7.92-7.90 (m, 3H), 7.72-7.66 (m, 3H), 7.51-7.49 (m, 3H), 7.29-7.28 (m, 2H), 7.12 (d,  $J$  = 9.2 Hz, 1H), 6.93 (dd,  $J$  = 9.2, 6.8 Hz, 1H), 4.14 (s, 2H), 4.07 (s, 3H), 2.95 (t,  $J$  = 7.6 Hz, 2H), 2.69 (s, 3H), 2.64-2.60 (m, 2H), 2.11-2.04 (m, 2H), 1.70-1.65 (m, 4H);  $^{13}\text{C}$  NMR (100 MHz,  $\text{CDCl}_3$ ):  $\delta$  = 169.3, 168.3, 163.8, 156.4, 156.1, 153.7 (dd,  $J$  = 289.8, 279.3 Hz), 152.8, 149.6, 139.3, 136.2, 134.8, 133.8, 131.4, 131.2,

130.8, 130.5, 129.3 (t,  $J = 2.9$  Hz), 129.1, 127.1, 126.4, 126.2, 121.4, 120.5, 115.0, 111.9, 111.8, 101.2, 91.4 (dd,  $J = 35.0, 20.4$  Hz), 55.7, 35.6, 30.5, 28.4, 27.4, 27.3, 27.0, 13.4;  $^{19}\text{F}$  NMR (376 MHz,  $\text{CDCl}_3$ )  $\delta = -91.74$  (d,  $J = 43.24$  Hz),  $-91.91$  (d,  $J = 41.36$  Hz) ppm; HRMS (ESI) calcd for  $\text{C}_{40}\text{H}_{35}\text{ClF}_2\text{N}_3\text{O}_5$   $[\text{M}+\text{H}]^+$  710.2228, found 710.2256.

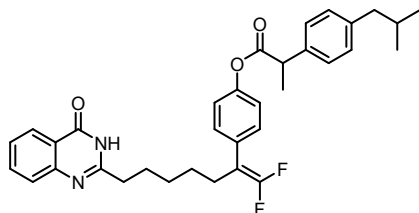

**4-(1,1-Difluoro-7-(4-oxo-3,4-dihydroquinazolin-2-yl)hept-1-en-2-yl)phenyl 2-(4-isobutylphenyl)propanoate (4n):** White solid (47%, 52.5 mg); m.p.: 149-150 °C;  $R_f = 0.2$  (EtOAc/petroleum ether = 1:3);  $^1\text{H}$  NMR (400 MHz,  $\text{CDCl}_3$ ):  $\delta = 11.9$  (s, 1H), 7.84 (dd,  $J = 8.0, 1.6$  Hz, 1H), 7.35-7.28 (m, 2H), 7.04-7.00 (m, 1H), 6.87 (d,  $J = 7.6$  Hz, 2H), 6.82 (d,  $J = 8.8$  Hz, 2H), 6.72 (d,  $J = 7.2$  Hz, 2H), 6.56-6.53 (m, 2H), 3.51 (q,  $J = 7.2$  Hz, 1H), 2.34 (t,  $J = 7.6$  Hz, 2H), 2.04 (d,  $J = 7.2$  Hz, 2H), 1.99-1.95 (m, 2H), 1.47-1.41 (m, 3H), 1.18 (d,  $J = 7.2$  Hz, 3H), 1.06-1.01 (m, 4H), 0.48 (d,  $J = 6.8$  Hz, 6H);  $^{13}\text{C}$  NMR (100 MHz,  $\text{CDCl}_3$ ):  $\delta = 173.2, 164.4, 156.8, 153.5$  (dd,  $J = 288.7, 285.2$  Hz), 149.8, 149.4, 140.8, 137.1, 134.8, 131.1, 129.5, 129.1 (t,  $J = 3.7$  Hz), 127.17, 127.15, 126.3, 126.1, 121.4, 120.4, 91.6 (dd,  $J = 19.4, 15.2$  Hz), 45.2, 45.0, 35.6, 30.1, 28.4, 27.4, 27.2, 27.0, 22.3, 18.4;  $^{19}\text{F}$  NMR (376 MHz,  $\text{CDCl}_3$ )  $\delta = -91.95$  (d,  $J = 43.24$  Hz),  $-92.08$  (d,  $J = 43.62$  Hz) ppm; HRMS (ESI) calcd for  $\text{C}_{34}\text{H}_{37}\text{F}_2\text{N}_2\text{O}_3$   $[\text{M}+\text{H}]^+$  559.2767, found 559.2781.

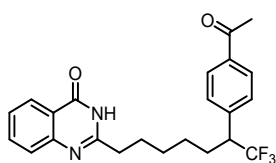

**2-(6-(4-Acetylphenyl)-7,7,7-trifluoroheptyl)quinazolin-4(3H)-one (5a):** White solid (73%, 60.8 mg); m.p.: 146-147 °C;  $R_f = 0.2$  (EtOAc/petroleum ether = 1:2);  $^1\text{H}$  NMR (400 MHz,  $\text{CDCl}_3$ ):  $\delta = 12.30$  (s, 1H), 8.24 (dd,  $J = 8.0, 1.6$  Hz, 1H), 7.91 (d,  $J = 8.4$  Hz, 2H), 7.80-7.75 (m, 1H), 7.69 (d,  $J = 8.0$  Hz, 1H), 7.49-7.45 (m, 1H), 7.35 (d,  $J = 7.6$  Hz, 2H), 3.35-3.24 (m, 1H), 2.76 (t,  $J = 8.0$  Hz, 2H), 2.57 (s, 3H), 2.08-2.01 (m, 1H), 1.92-1.81 (m, 3H), 1.51-1.41 (m, 2H), 1.31-1.22 (m, 2H);  $^{13}\text{C}$  NMR (100 MHz,  $\text{CDCl}_3$ ):  $\delta = 197.5, 164.4, 156.7, 149.2, 140.0, 136.8, 134.9, 129.2, 128.6, 127.1, 126.5$  (q,  $J = 278.1$  Hz), 126.4, 126.1, 120.3, 49.9 (q,  $J = 26.6$  Hz), 35.5, 28.6, 28.4, 26.9, 26.6, 26.3;  $^{19}\text{F}$  NMR: (376 MHz,  $\text{CDCl}_3$ )  $\delta = -69.30$  (d,  $J = 8.6$  Hz) ppm; HRMS (ESI) calcd for  $\text{C}_{23}\text{H}_{24}\text{F}_3\text{N}_2\text{O}_2$   $[\text{M}+\text{H}]^+$  417.1784, found 417.1789

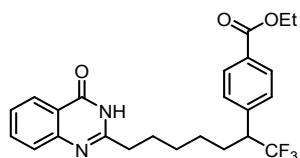

**Ethyl 4-(1,1,1-trifluoro-7-(4-oxo-3,4-dihydroquinazolin-2-yl)heptan-2-yl)benzoate (5b):**

White solid (56%, 50.0 mg); m.p.: 150-151 °C;  $R_f = 0.2$  (EtOAc/petroleum ether = 1:2);  $^1\text{H}$  NMR (400 MHz,  $\text{CDCl}_3$ ):  $\delta = 11.93$  (s, 1H), 8.24 (dd,  $J = 8.0, 1.6$  Hz, 1H), 8.01 (d,  $J = 8.4$  Hz, 2H), 7.80-7.76 (m, 1H), 7.69 (d,  $J = 8.0$  Hz, 1H), 7.49-7.45 (m, 1H), 7.33 (d,  $J = 8.4$  Hz, 2H), 4.37 (q,  $J = 7.2$  Hz, 2H), 3.34-3.24 (m, 1H), 2.75 (t,  $J = 8.0$  Hz, 2H), 2.09-2.01 (m, 1H), 1.94-1.79 (m, 3H), 1.54-1.42 (m, 2H), 1.38 (t,  $J = 6.8$  Hz, 3H), 1.30-1.21 (m, 2H);  $^{13}\text{C}$  NMR (100 MHz,  $\text{CDCl}_3$ ):  $\delta = 166.4, 164.6, 156.8, 149.6, 140.0, 135.2, 130.7, 130.2, 129.3, 127.5, 126.9$  (q,  $J = 278.1$  Hz), 126.7, 126.4, 120.7, 61.3, 50.3 (q,  $J = 26.2$  Hz), 35.9, 29.0, 28.7, 27.2, 26.6, 14.6;  $^{19}\text{F}$  NMR (376 MHz,  $\text{CDCl}_3$ )  $\delta = -69.35$  (d,  $J = 9.02$  Hz) ppm; HRMS (ESI) calcd for  $\text{C}_{24}\text{H}_{26}\text{F}_3\text{N}_2\text{O}_3$   $[\text{M}+\text{H}]^+$  447.1890, found 447.1902

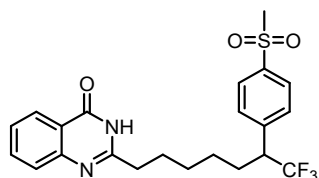

**2-(7,7,7-Trifluoro-6-(4-(methylsulfonyl)phenyl)heptyl)quinazolin-4(3H)-one (5c):** White solid (70%, 63.3 mg); m.p.: 149-150 °C;  $R_f = 0.2$  (EtOAc/petroleum ether = 1:1);  $^1\text{H}$  NMR (400 MHz,  $\text{CDCl}_3$ ):  $\delta = 12.16$  (s, 1H), 8.25 (dd,  $J = 8.0, 1.6$  Hz, 1H), 7.92 (d,  $J = 8.4$  Hz, 2H), 7.81-7.76 (m, 1H), 7.69 (d,  $J = 8.4$  Hz, 1H), 7.50-7.46 (m, 3H), 3.40-3.29 (m, 1H), 3.06 (s, 3H), 2.76 (t,  $J = 7.6$  Hz, 2H), 2.12-2.03 (m, 1H), 1.95-1.80 (m, 3H), 1.54-1.39 (m, 2H), 1.30-1.19 (m, 2H);  $^{13}\text{C}$  NMR (100 MHz,  $\text{CDCl}_3$ ):  $\delta = 164.4, 156.7, 149.1, 141.1, 140.4, 135.0, 130.1, 127.8, 127.1, 126.6, 126.4$  (q,  $J = 278.6$  Hz), 126.1, 120.4, 50.0 (q,  $J = 26.7$  Hz), 44.4, 35.4, 28.6, 28.5, 26.9, 26.3;  $^{19}\text{F}$  NMR (376 MHz,  $\text{CDCl}_3$ )  $\delta = -68.99$  (d,  $J = 9.02$  Hz) ppm; HRMS (ESI) calcd for  $\text{C}_{22}\text{H}_{24}\text{F}_3\text{N}_2\text{O}_3\text{S}$   $[\text{M}+\text{H}]^+$  453.1454, found 453.1470.

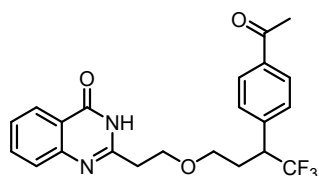

**2-(2-(3-(4-Acetylphenyl)-4,4,4-trifluorobutoxy)ethyl)quinazolin-4(3H)-one (5d):** White solid (81%, 67.7 mg); m.p.: 149-150 °C;  $R_f = 0.2$  (EtOAc/petroleum ether = 1:3);  $^1\text{H}$  NMR (400 MHz,  $\text{CDCl}_3$ ):  $\delta = 11.66$  (s, 1H), 8.29 (d,  $J = 8.0$  Hz, 1H), 7.83 (d,  $J = 7.6$  Hz, 2H), 7.79-7.75 (m, 1H), 7.68 (d,  $J = 8.4$  Hz, 1H), 7.50-7.46 (m, 1H), 7.32 (d,  $J = 8.0$  Hz, 2H), 3.90-3.84 (m, 1H), 3.78-3.72 (m, 1H), 3.66-3.59 (m, 1H), 3.52-3.48 (m, 1H), 3.21-3.15 (m, 1H), 3.02 (t,  $J =$

6.8 Hz, 2H), 2.54 (s, 3H), 2.40-2.30 (m, 1H), 2.06-1.98 (m, 1H);  $^{13}\text{C}$  NMR (100 MHz,  $\text{CDCl}_3$ ):  $\delta = 197.5, 163.3, 154.6, 148.9, 139.4, 136.9, 134.9, 129.3, 128.6, 127.0, 126.7, 126.6$  (q,  $J = 278.8$  Hz), 126.3, 120.7, 67.7, 67.0, 46.2 (q,  $J = 27.1$  Hz), 35.9, 28.8, 26.5;  $^{19}\text{F}$  NMR (376 MHz,  $\text{CDCl}_3$ )  $\delta = -69.33$  (d,  $J = 9.40$  Hz) ppm; HRMS (ESI) calcd for  $\text{C}_{22}\text{H}_{22}\text{F}_3\text{N}_2\text{O}_3$   $[\text{M}+\text{H}]^+$  419.1577, found 419.1590

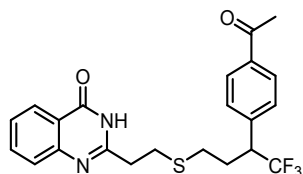

**2-(2-((3-(4-Acetylphenyl)-4,4,4-trifluorobutyl)thio)ethyl)quinazolin-4(3H)-one (5e):**

White solid (66%, 57.3 mg); m.p.: 128-129 °C;  $R_f = 0.2$  (EtOAc/petroleum ether = 1:3);  $^1\text{H}$  NMR (400 MHz,  $\text{CDCl}_3$ ):  $\delta = 12.39$  (s, 1H), 8.24 (d,  $J = 8.0$  Hz, 1H), 7.91 (d,  $J = 6.8$  Hz, 2H), 7.81-7.78 (m, 1H), 7.73-7.69 (m, 1H), 7.52-7.48 (m, 1H), 7.38 (d,  $J = 7.6$  Hz, 2H), 3.66-3.59 (m, 1H), 3.12-3.04 (m, 4H), 2.67-2.62 (m, 1H), 2.57 (s, 3H), 2.40-2.30 (m, 2H), 2.26-2.17 (m, 1H);  $^{13}\text{C}$  NMR (100 MHz,  $\text{CDCl}_3$ ):  $\delta = 197.5, 164.3, 154.7, 148.8, 139.0, 137.0, 135.1, 129.3, 128.7, 127.1, 126.8, 126.4$  (q,  $J = 278.8$  Hz), 126.2, 120.4, 48.2 (q,  $J = 26.9$  Hz), 35.5, 28.8, 28.6, 28.2, 26.6;  $^{19}\text{F}$  NMR (376 MHz,  $\text{CDCl}_3$ )  $\delta = -69.03$  (d,  $J = 9.40$  Hz) ppm; HRMS (ESI) calcd for  $\text{C}_{22}\text{H}_{22}\text{F}_3\text{N}_2\text{O}_2\text{S}$   $[\text{M}+\text{H}]^+$  435.1349, found 435.1363.

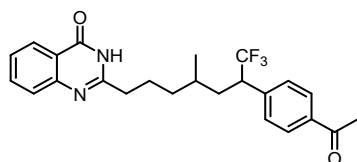

**2-(6-(4-Acetylphenyl)-7,7,7-trifluoro-4-methylheptyl)quinazolin-4(3H)-one (5f):** White solid (76%, 65.4 mg); m.p.: 125-126 °C;  $R_f = 0.2$  (EtOAc/petroleum ether = 1:3, dr = 1:1.5);  $^1\text{H}$  NMR (400 MHz,  $\text{CDCl}_3$ ):  $\delta = 12.41$  (s, 0.4 H), 12.35 (s, 0.6H), 8.27-8.24 (m, 1H), 7.91-7.86 (m, 2H), 7.80-7.75 (m, 1H), 7.72-7.67 (m, 1H), 7.49-7.44 (m, 1H), 7.38-7.34 (m, 2H), 3.51-3.40 (m, 1H), 2.79-2.71 (m, 2H), 2.55 (s, 3H), 2.10-1.69 (m, 4H), 1.46-1.21 (m, 3H), 0.91-0.88 (m, 3H);  $^{13}\text{C}$  NMR (100 MHz,  $\text{CDCl}_3$ ):  $\delta = 197.5, 164.6, 156.6, 149.4, 140.3, 139.8, 136.9, 136.8, 134.9, 134.8, 129.3, 129.2, 128.6, 127.2, 126.7$  (q,  $J = 281.5$  Hz), 126.4, 126.3, 126.0, 120.4, 47.7 (q,  $J = 26.4$  Hz), 37.1, 35.8, 35.6, 35.0, 34.3, 29.3, 29.2, 26.5, 24.6, 23.9, 20.1, 18.3;  $^{19}\text{F}$  NMR (376 MHz,  $\text{CDCl}_3$ )  $\delta = -69.91$  (d,  $J = 8.65$  Hz), -70.17 (d,  $J = 8.65$  Hz) ppm; HRMS (ESI) calcd for  $\text{C}_{24}\text{H}_{26}\text{F}_3\text{N}_2\text{O}_2$   $[\text{M}+\text{H}]^+$  431.1941, found 431.1946.

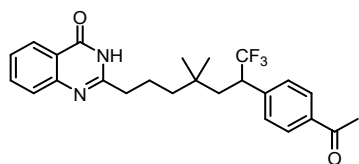

**2-(6-(4-Acetylphenyl)-7,7,7-trifluoro-4,4-dimethylheptyl)quinazolin-4(3H)-one (5g):**

White solid (81%, 72.0 mg); m.p.: 112-113 °C;  $R_f = 0.2$  (EtOAc/petroleum ether = 1:3);  $^1\text{H}$  NMR (400 MHz,  $\text{CDCl}_3$ ):  $\delta = 12.09$  (s, 1H), 8.27 (dd,  $J = 8.0, 1.6$  Hz, 1H), 7.89 (d,  $J = 8.4$  Hz, 2H), 7.80-7.76 (m, 1H), 7.72-7.69 (m, 1H), 7.50-7.46 (m, 1H), 7.40 (d,  $J = 8.0$  Hz, 2H), 3.49-3.40 (m, 1H), 2.68 (t,  $J = 7.6$  Hz, 2H), 2.57 (s, 3H), 2.01-1.97 (m, 2H), 1.90-1.84 (m, 1H), 1.77-1.70 (m, 1H), 1.40-1.34 (m, 1H), 1.30-1.24 (m, 1H), 0.77 (s, 3H), 0.75 (s, 3H);  $^{13}\text{C}$  NMR (100 MHz,  $\text{CDCl}_3$ ):  $\delta = 197.5, 164.4, 156.4, 149.4, 142.0, 136.7, 134.9, 129.6, 128.6, 127.2, 126.4, 126.8$  (q,  $J = 278.5$  Hz), 126.1, 120.4, 46.5 (q,  $J = 26.2$  Hz), 41.6, 40.0, 36.1, 33.3, 27.4, 27.3, 26.6, 21.7;  $^{19}\text{F}$  NMR (376 MHz,  $\text{CDCl}_3$ )  $\delta = -70.45$  (d,  $J = 10.5$  Hz) ppm; HRMS (ESI) calcd for  $\text{C}_{25}\text{H}_{28}\text{F}_3\text{N}_2\text{O}_2$   $[\text{M}+\text{H}]^+$  445.2097, found 445.2106.

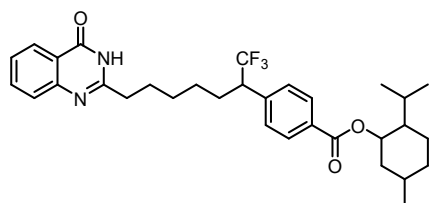

**2-Isopropyl-5-methylcyclohexyl 4-(1,1,1-trifluoro-7-(4-oxo-3,4-dihydroquinazolin-2-yl)heptan-2-yl)benzoate (5h):**

White solid (58%, 64.5 mg); m.p.: 118-119 °C;  $R_f = 0.2$  (EtOAc/petroleum ether = 1:3);  $^1\text{H}$  NMR (400 MHz,  $\text{CDCl}_3$ ):  $\delta = 12.27$  (s, 1H), 8.25 (d,  $J = 7.6$  Hz, 1H), 8.01 (d,  $J = 8.0$  Hz, 2H), 7.79-7.75 (m, 1H), 7.69 (d,  $J = 8.0$  Hz, 1H), 7.48-7.45 (m, 1H), 7.33 (d,  $J = 8.4$  Hz, 2H), 4.96-4.89 (m, 1H), 3.34-3.25 (m, 1H), 2.76 (t,  $J = 8.0$  Hz, 2H), 2.11-2.03 (m, 2H), 1.95-1.82 (m, 4H), 1.75-1.69 (m, 2H), 1.57-1.41 (m, 4H), 1.30-1.22 (m, 2H), 1.14-1.03 (m, 2H), 0.96-0.87 (m, 7H), 0.78 (d,  $J = 6.8$  Hz, 3H);  $^{13}\text{C}$  NMR (100 MHz,  $\text{CDCl}_3$ ):  $\delta = 165.6, 164.5, 156.6, 149.4, 139.6, 134.9, 130.7, 129.9, 129.0, 127.2, 126.6$  (q,  $J = 278.2$  Hz), 126.4, 126.1, 120.3, 74.9, 49.9 (q,  $J = 26.7$  Hz), 47.2, 40.9, 35.6, 34.2, 31.4, 28.7, 27.0, 26.4, 26.3, 23.5, 22.0, 20.7, 16.4;  $^{19}\text{F}$  NMR (376 MHz,  $\text{CDCl}_3$ )  $\delta = -69.35$  (d,  $J = 10.15$  Hz) ppm; HRMS (ESI) calcd for  $\text{C}_{32}\text{H}_{40}\text{F}_2\text{N}_2\text{O}_3$   $[\text{M}+\text{H}]^+$  557.2986, found 557.2992.

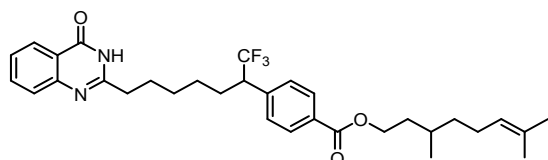

**3,7-Dimethyloct-6-en-1-yl 4-(1,1,1-trifluoro-7-(4-oxo-3,4-dihydroquinazolin-2-yl)heptan-2-yl)benzoate (5i):**

White solid (61%, 67.9 mg); m.p.: 114-115 °C;  $R_f = 0.2$  (EtOAc/petroleum ether = 1:3);  $^1\text{H}$  NMR (400 MHz,  $\text{CDCl}_3$ ):  $\delta = 12.35$  (s, 1H), 8.25 (d,  $J = 8.0$  Hz, 1H), 8.00 (d,

$J = 8.4$  Hz, 2H), 7.79-7.75 (m, 1H), 7.68 (d,  $J = 8.0$  Hz, 1H), 7.48-7.44 (m, 1H), 7.33 (d,  $J = 8.0$  Hz, 2H), 5.08 (t,  $J = 7.6$  Hz, 1H), 4.38-4.31 (m, 2H), 3.33-3.26 (m, 1H), 2.76 (t,  $J = 7.6$  Hz, 2H), 2.07-1.79 (m, 8H), 1.65 (s, 3H), 1.58 (s, 3H), 1.50-1.37 (m, 4H), 1.28-1.20 (m, 3H), 0.96 (d,  $J = 6.8$  Hz, 3H);  $^{13}\text{C}$  NMR (100 MHz,  $\text{CDCl}_3$ ):  $\delta = 166.1, 164.6, 156.6, 149.4, 139.7, 134.7, 131.3, 130.3, 129.8, 128.9, 127.2, 126.5$  (q,  $J = 280.0$  Hz), 126.3, 126.0, 124.5, 120.3, 63.5, 49.90 (q,  $J = 27.3$  Hz), 36.9, 35.5, 35.4, 29.4, 28.6, 28.4, 26.9, 26.3, 25.6, 25.3, 19.4, 17.5;  $^{19}\text{F}$  NMR (376 MHz,  $\text{CDCl}_3$ )  $\delta = -70.02$  (d,  $J = 8.65$  Hz) ppm; HRMS (ESI) calcd for  $\text{C}_{32}\text{H}_{40}\text{F}_3\text{N}_2\text{O}_3$   $[\text{M}+\text{H}]^+$  557.2986, found 557.3008.

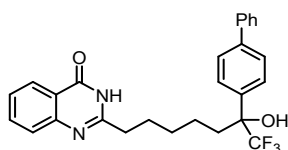

**2-(6-((1,1'-Biphenyl)-4-yl)-7,7,7-trifluoro-6-hydroxyheptyl)quinazolin-4(3H)-one (6a):**

White solid (73%, 68.1mg). m.p.: 109-110 °C.  $^1\text{H}$  NMR (400 MHz,  $\text{DMSO}-d_6$ ):  $\delta = 12.11$  (s, 1H), 8.04 (d,  $J = 8.0$  Hz, 1H), 7.74-7.52 (m, 9H), 7.43-7.38 (m, 2H), 7.36-7.29 (m, 1H), 6.43 (s, 1H), 2.52-2.46 (m, 2H), 2.25-2.14 (m, 1H), 2.05-1.92 (m, 1H), 1.74-1.59 (m, 2H), 1.37-1.26 (m, 3H), 1.00-0.85 (m, 1H).  $^{13}\text{C}$  NMR (100 MHz,  $\text{DMSO}-d_6$ ):  $\delta = 162.0, 157.5, 149.1, 139.8, 139.7, 136.8, 134.3, 129.02, 127.7, 127.4, 126.3$  (q,  $J = 285.2$  Hz), 126.9, 126.8, 126.4, 126.0, 125.8, 120.9, 76.0 (q,  $J = 26.7$  Hz), 34.6, 33.7, 28.7, 26.7, 21.9;  $^{19}\text{F}$  NMR (376 MHz,  $\text{DMSO}-d_6$ ):  $\delta = -79.86$  (s) ppm; HRMS (ESI) calcd for  $\text{C}_{27}\text{H}_{26}\text{F}_3\text{N}_2\text{O}_2$   $[\text{M}+\text{H}]^+$  467.1941, found 467.1953.

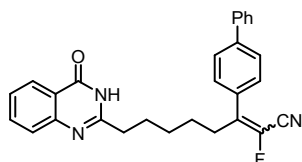

**3-((1,1'-biphenyl)-4-yl)-2-fluoro-8-(4-oxo-3,4-dihydroquinazolin-2-yl)oct-2-enenitrile**

**(6b):** White solid (51%, 44.6mg). m.p.: 107-108 °C.  $^1\text{H}$  NMR (400 MHz,  $\text{CDCl}_3$ ):  $\delta = 12.34$  (s, 1H), 8.27 (dd,  $J = 7.6, 1.2$  Hz, 1H), 7.79-7.74 (m, 1H), 7.72-7.69 (m, 1H), 7.62-7.56 (m, 4H), 7.48-7.41 (m, 5H), 7.39-7.35 (m, 1H), 2.79 (t,  $J = 7.2$  Hz, 2H), 2.73-2.68 (m, 2H), 1.92-1.86 (m, 2H), 1.55-1.49 (m, 4H).  $^{13}\text{C}$  NMR (100 MHz,  $\text{CDCl}_3$ ):  $\delta = 164.5, 156.6, 149.2, 142.5, 140.5$  (d,  $J = 14.8$  Hz), 139.9, 134.9, 131.8 (d,  $J = 3.9$  Hz), 130.7, 128.8, 128.4, 127.8, 127.6, 127.1, 127.0, 126.5, 126.1, 120.3, 112.6 (d,  $J = 47.1$  Hz), 35.4, 30.0, 28.6, 26.9, 26.7;  $^{19}\text{F}$  NMR (376 MHz,  $\text{CDCl}_3$ ):  $\delta = -124.50$  (s) ppm. HRMS (ESI) calcd for  $\text{C}_{28}\text{H}_{25}\text{FN}_3\text{O}$   $[\text{M}+\text{H}]^+$  438.1976 found 438.1986.



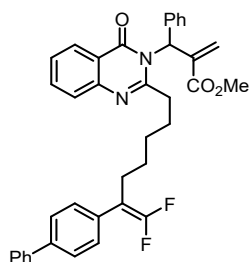

**Methyl 2-((2-(6-([1,1'-biphenyl]-4-yl)-7,7-difluorohept-6-en-1-yl)-4-oxoquinazolin-3(4H)-yl)(phenyl)methyl)acrylate (6c):** White solid (88%, 106.2mg). m.p.: 121-122 °C. <sup>1</sup>H NMR (400 MHz, CDCl<sub>3</sub>): δ = 8.13 (d, *J* = 7.6 Hz, 1H), 7.65-7.60 (m, 1H), 7.55-7.49 (m, 5H), 7.38 - 7.33 (m, 3H), 7.30-7.25 (m, 3H), 7.22-7.14 (m, 5H), 6.70 (s, 1H), 6.46 (s, 1H), 5.53 (s, 1H), 3.62 (s, 3H), 2.80-2.65 (m, 2H), 2.35-2.27 (m, 2H), 1.61-1.52 (m, 2H), 1.31-1.19 (m, 4H). <sup>13</sup>C NMR (100 MHz, CDCl<sub>3</sub>): δ = 166.5, 162.6, 157.5, 153.6 (dd, *J* = 291.5, 289.6 Hz), 147.0, 140.5, 140.0, 138.1, 136.8, 134.3, 132.6, 128.78, 128.76, 128.7, 128.5 (t, *J* = 3.5 Hz), 127.9, 127.8, 127.4, 127.1, 127.0, 126.9, 126.8, 126.4, 121.1, 91.93 (dd, *J* = 20.5, 17.0 Hz), 60.0, 52.3, 36.0, 28.6, 27.4, 27.3, 26.8; <sup>19</sup>F NMR (376 MHz, CDCl<sub>3</sub>) δ = -90.95 (d, *J* = 42.86 Hz), -91.13 (d, *J* = 43.24 Hz) ppm; HRMS (ESI) calcd for C<sub>38</sub>H<sub>35</sub>F<sub>2</sub>N<sub>2</sub>O<sub>3</sub> [M+H]<sup>+</sup> 605.2610, found 605.2612.

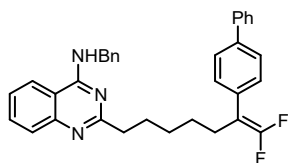

**2-(6-([1,1'-biphenyl]-4-yl)-7,7-difluorohept-6-en-1-yl)-N-benzylquinazolin-4-amine (6d):** colourless oil (81%, 84.4 mg): <sup>1</sup>H NMR (400 MHz, CDCl<sub>3</sub>): δ = 7.79 (d, *J* = 8.0 Hz, 1H), 7.70-7.64 (m, 2H), 7.60-7.54 (m, 4H), 7.46-7.42 (m, 2H), 7.40-7.29 (m, 9H), 5.99 (s, 1H), 4.87 (d, *J* = 5.2 Hz, 2H), 2.85 (t, *J* = 7.2 Hz, 2H), 2.45-2.40 (m, 2H), 1.89-1.82 (m, 2H), 1.47-1.43 (m, 4H). <sup>13</sup>C NMR (100 MHz, CDCl<sub>3</sub>) δ = 166.8, 158.6, 152.9 (dd, *J* = 288.3, 284.6 Hz), 149.4, 139.9, 139.2, 138.0, 132.1, 131.8, 128.1, 128.0, 127.9 (t, *J* = 3.7 Hz), 127.4, 127.3, 126.9, 126.6, 126.4, 126.3, 124.4, 119.7, 112.4, 91.5 (dd, *J* = 21.9, 13.2 Hz), 44.4, 39.2, 28.3, 27.6, 27.1, 26.8; <sup>19</sup>F NMR (376 MHz, CDCl<sub>3</sub>) δ = -91.11 (d, *J* = 45.50 Hz), -91.45 (d, *J* = 45.50 Hz) ppm; HRMS (ESI) calcd for C<sub>34</sub>H<sub>32</sub>F<sub>2</sub>N<sub>3</sub> [M+H]<sup>+</sup> 520.2559, found 520.2564.

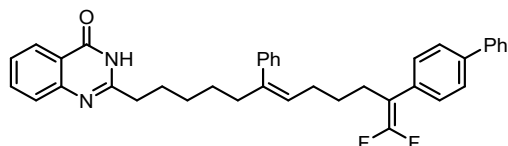

**2-(11-([1,1'-Biphenyl]-4-yl)-12,12-difluoro-6-phenyldodeca-6,11-dien-1-yl)quinazolin-4(3H)-one (8a):** colorless oil (12%, 13.7 mg); *R<sub>f</sub>* = 0.2 (EtOAc/petroleum ether = 1:3, *Z/E* = 7:3); <sup>1</sup>H NMR (400 MHz, CDCl<sub>3</sub>): δ = 11.86 (s, 1H), 8.26 (d, *J* = 8.0 Hz, 1H), 7.78-7.69 (m,

2H), 7.60-7.54 (m, 3H), 7.46-7.37 (m, 4H), 7.34-7.26 (m, 6H), 7.22-7.18 (m, 1H), 7.13-7.08 (m, 1H), 5.59 (t,  $J = 7.2$  Hz, 0.7H), 5.39 (t,  $J = 7.2$  Hz, 0.3H), 2.77-2.70 (m, 2H), 2.52-2.47 (m, 3H), 2.37-2.33 (m, 1H), 2.23-2.13 (m, 2H), 1.97-1.81 (m, 3H), 1.58-1.51 (m, 1H), 1.47-1.39 (m, 4H);  $^{13}\text{C}$  NMR (100 MHz,  $\text{CDCl}_3$ ):  $\delta = 164.2, 156.8, 153.6$  (dd,  $J = 289.5, 286.8$  Hz), 149.4, 143.1, 143.0, 140.6, 140.4, 139.9, 134.8, 132.5, 128.8, 128.5 (t,  $J = 3.6$  Hz), 128.3, 128.1, 128.0, 127.3, 127.15, 127.06, 126.9, 126.5, 126.3, 126.2, 120.4, 91.9 (dd,  $J = 21.7, 12.4$  Hz), 39.0, 35.8, 29.6, 29.1, 28.22, 28.18, 27.9, 27.6, 27.32, 27.27, 27.1, 26.9;  $^{19}\text{F}$  NMR (376 MHz,  $\text{CDCl}_3$ )  $\delta = -90.64 - -91.16$  (m) ppm; HRMS (ESI) calcd for  $\text{C}_{38}\text{H}_{37}\text{F}_2\text{N}_2\text{O}$   $[\text{M}+\text{H}]^+$  575.2869, found 575.2874.

# 11. $^1\text{H}$ NMR, $^{13}\text{C}$ NMR and $^{19}\text{F}$ NMR Spectra of Products

$^1\text{H}$  NMR and  $^{13}\text{C}$  NMR spectra for product 1a (DMSO- $d_6$ )

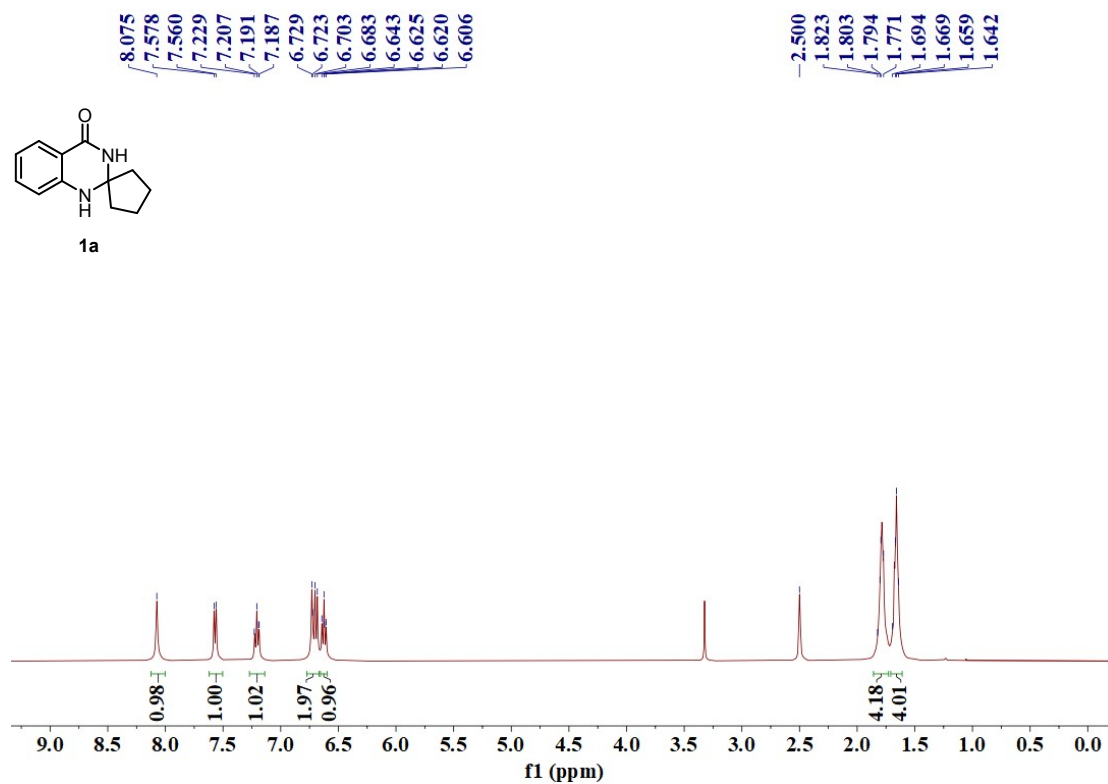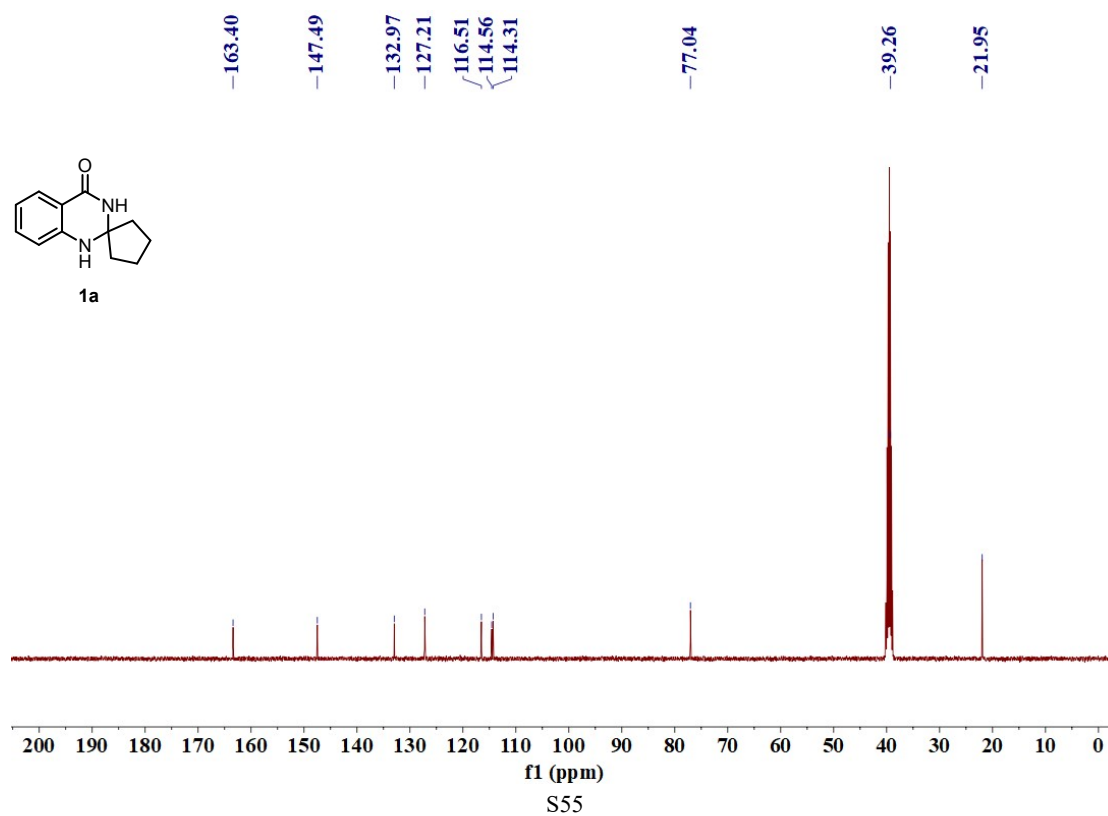

<sup>1</sup>H NMR and <sup>13</sup>C NMR spectra for product 1b (DMSO-d<sub>6</sub>)

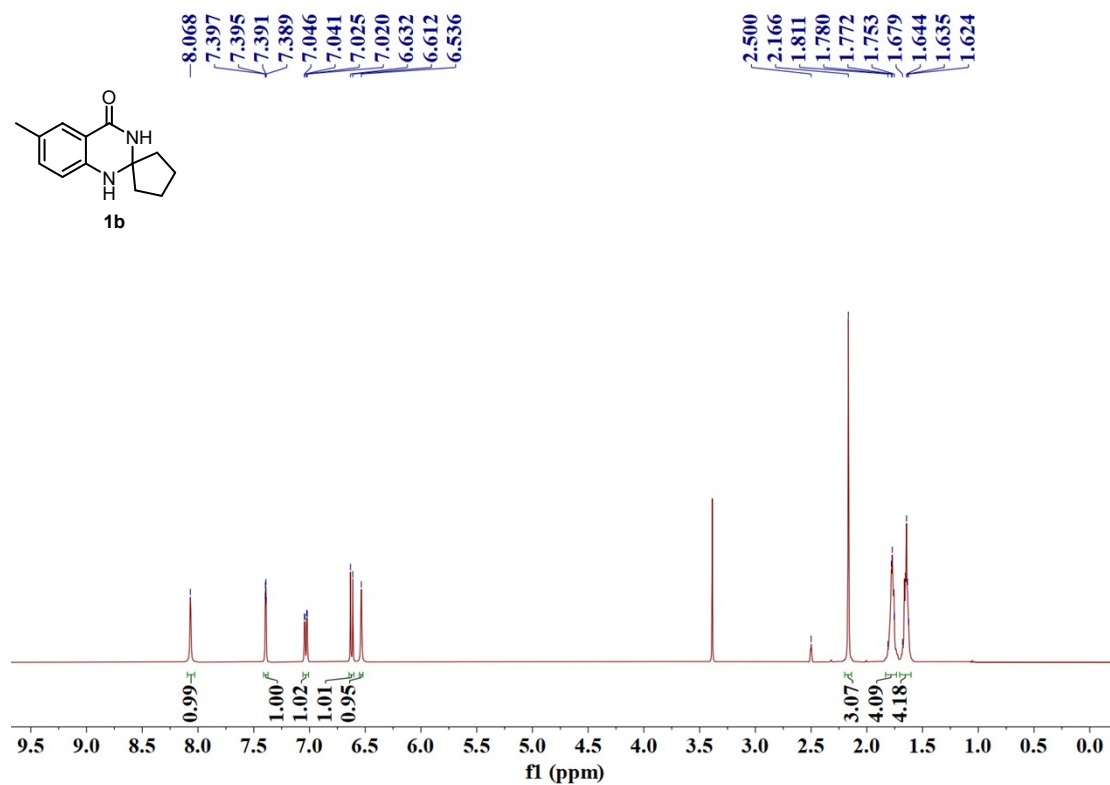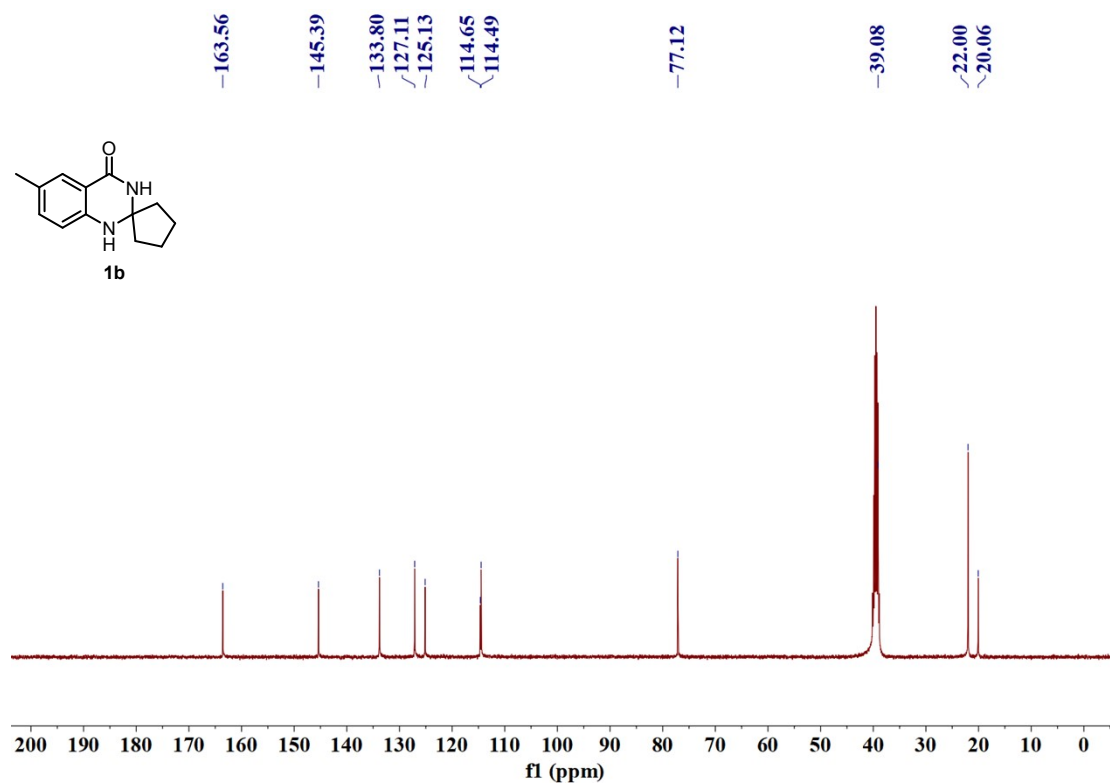

<sup>1</sup>H NMR, <sup>13</sup>C NMR and <sup>19</sup>F NMR spectra for product 1c (DMSO-d<sub>6</sub>)

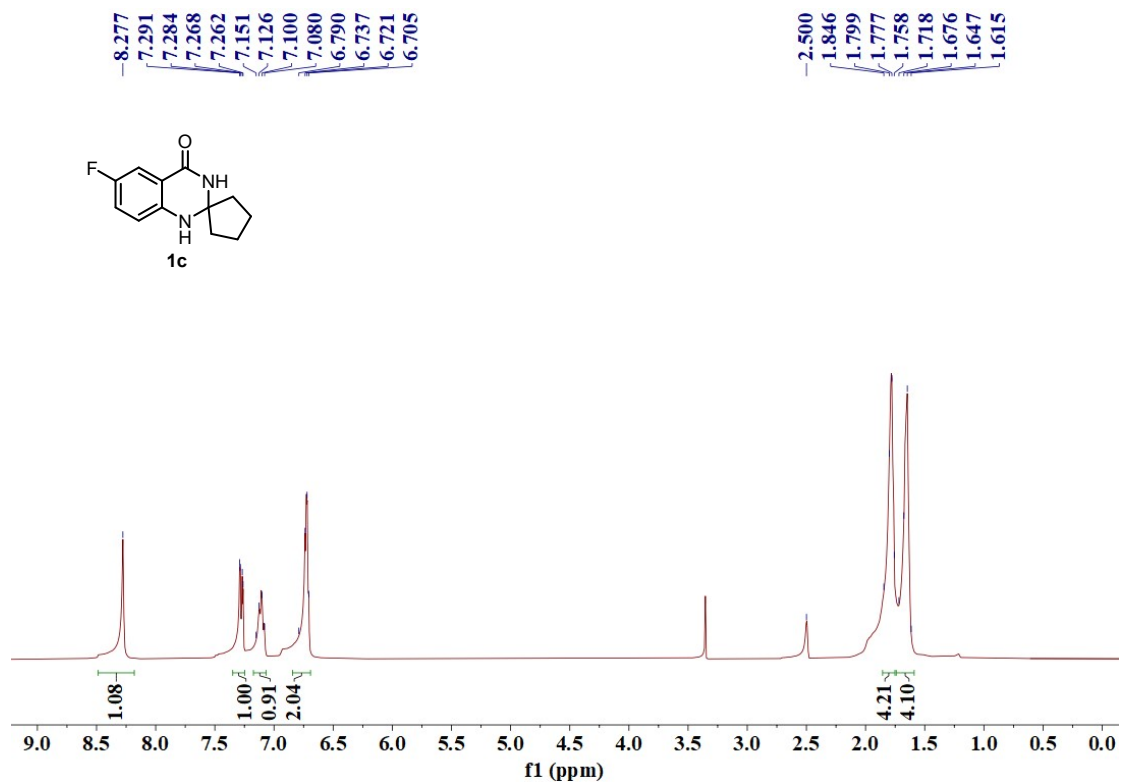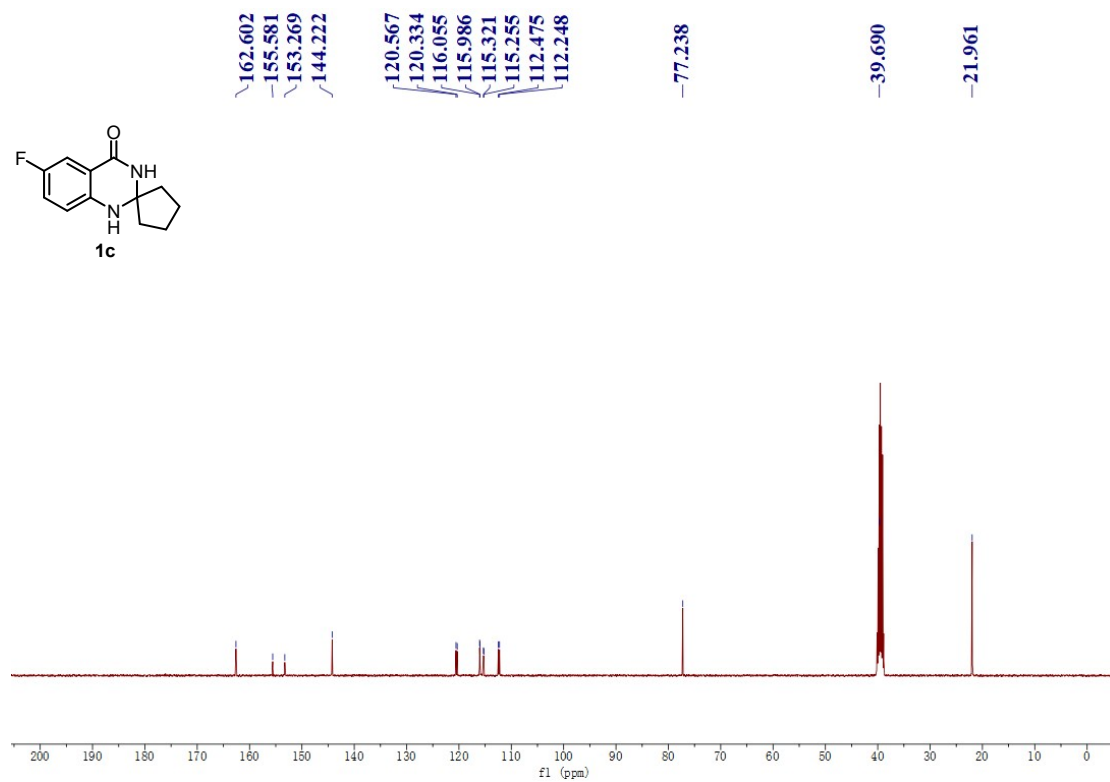

<sup>1</sup>H NMR and <sup>13</sup>C NMR spectra for product 1d (DMSO-d<sub>6</sub>)

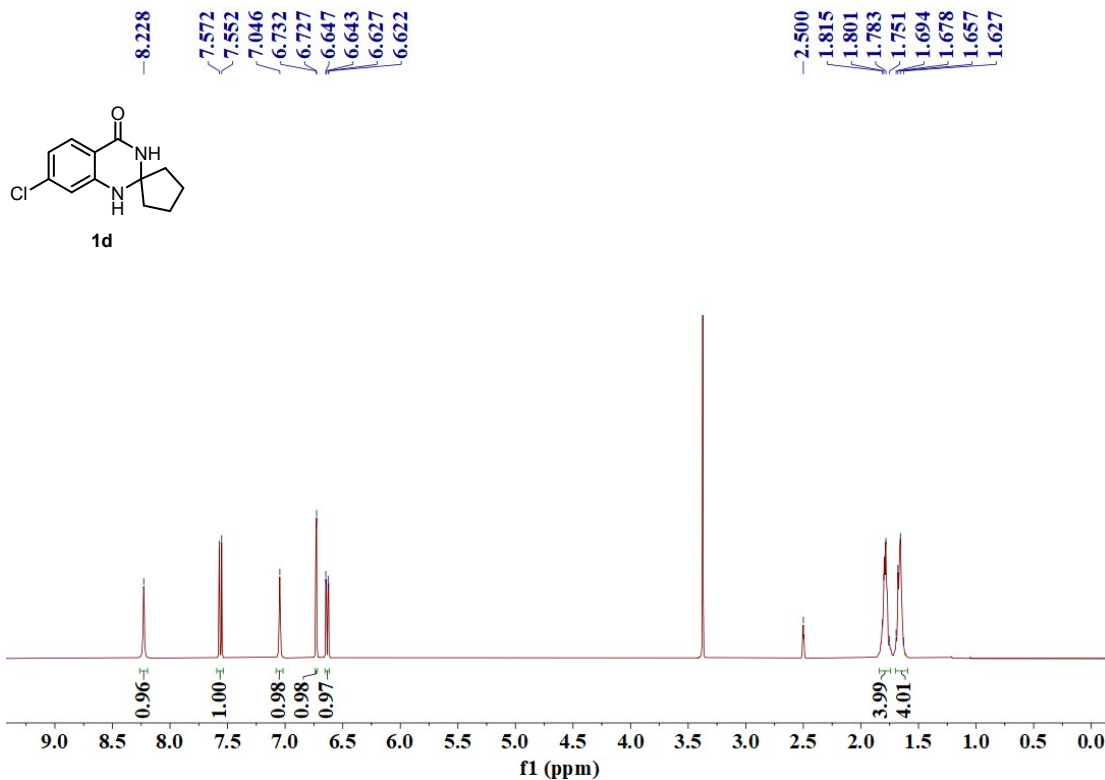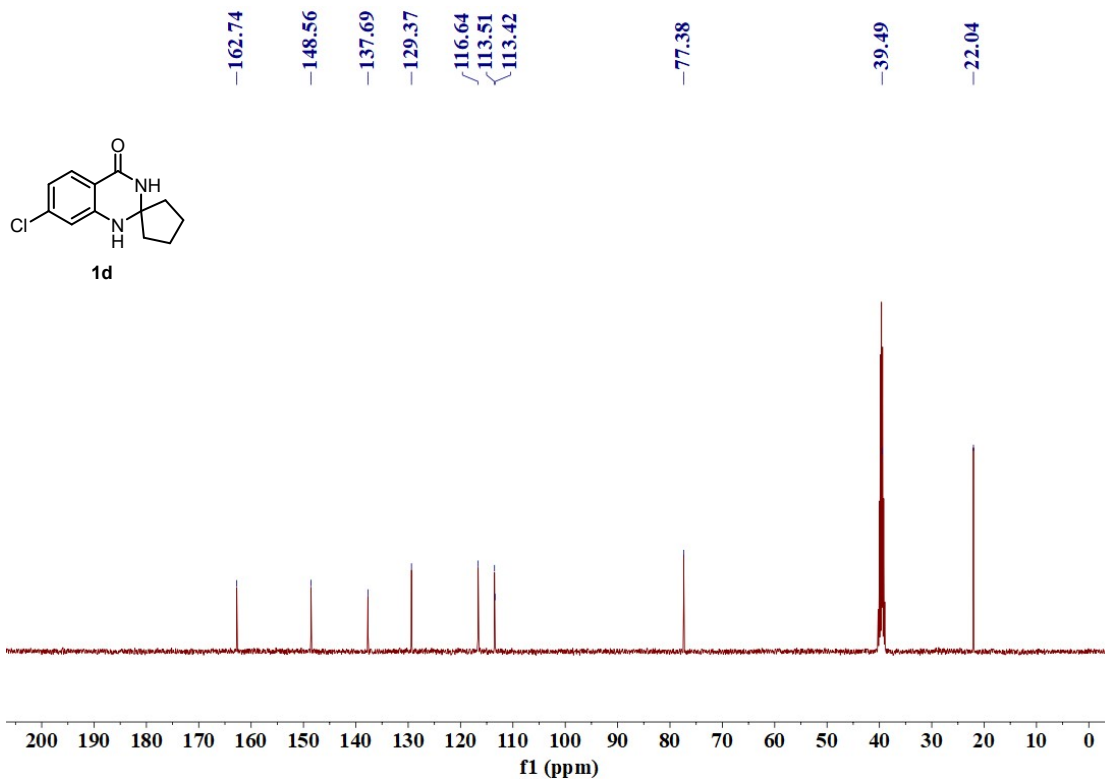

<sup>1</sup>H NMR and <sup>13</sup>C NMR spectra for product 1e (DMSO-d<sub>6</sub>)

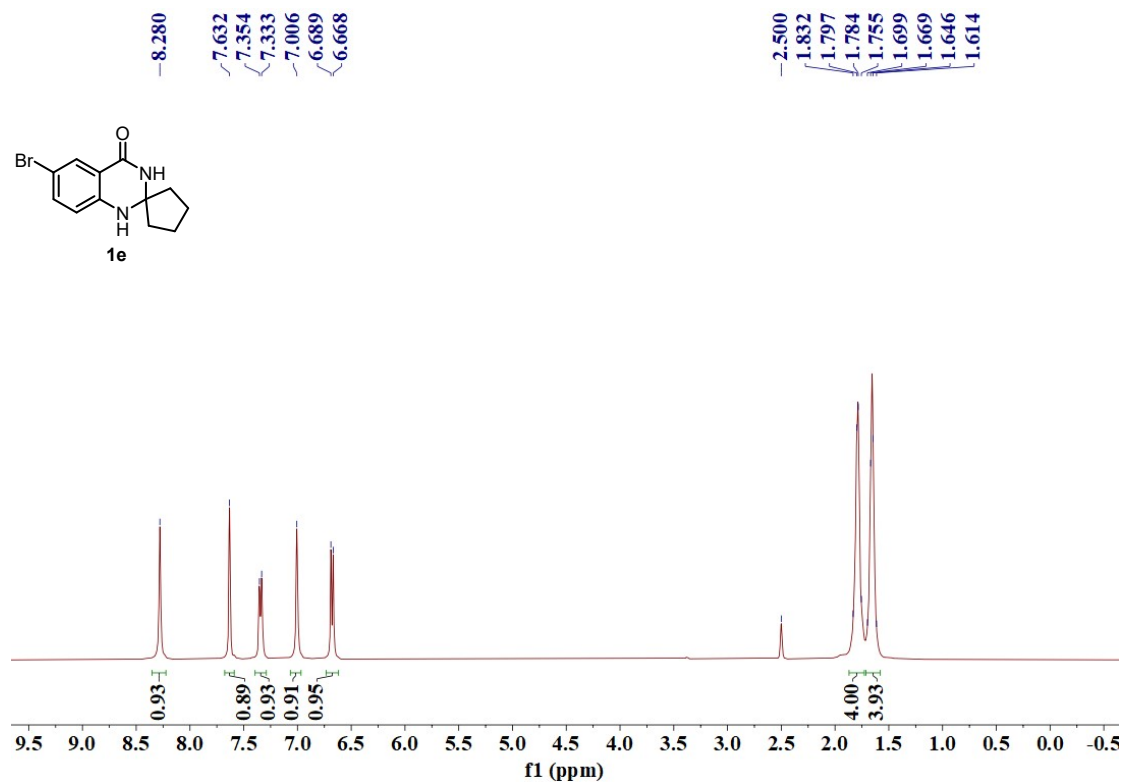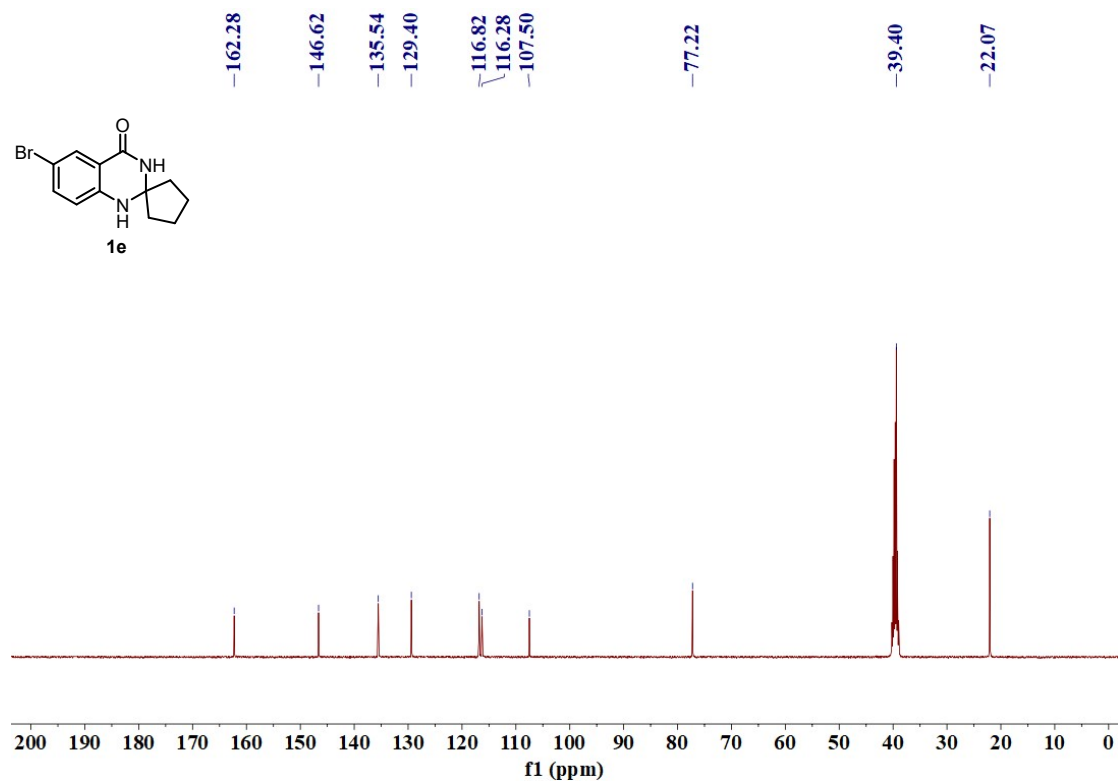

<sup>1</sup>H NMR and <sup>13</sup>C NMR spectra for product 1g (DMSO-d<sub>6</sub>)

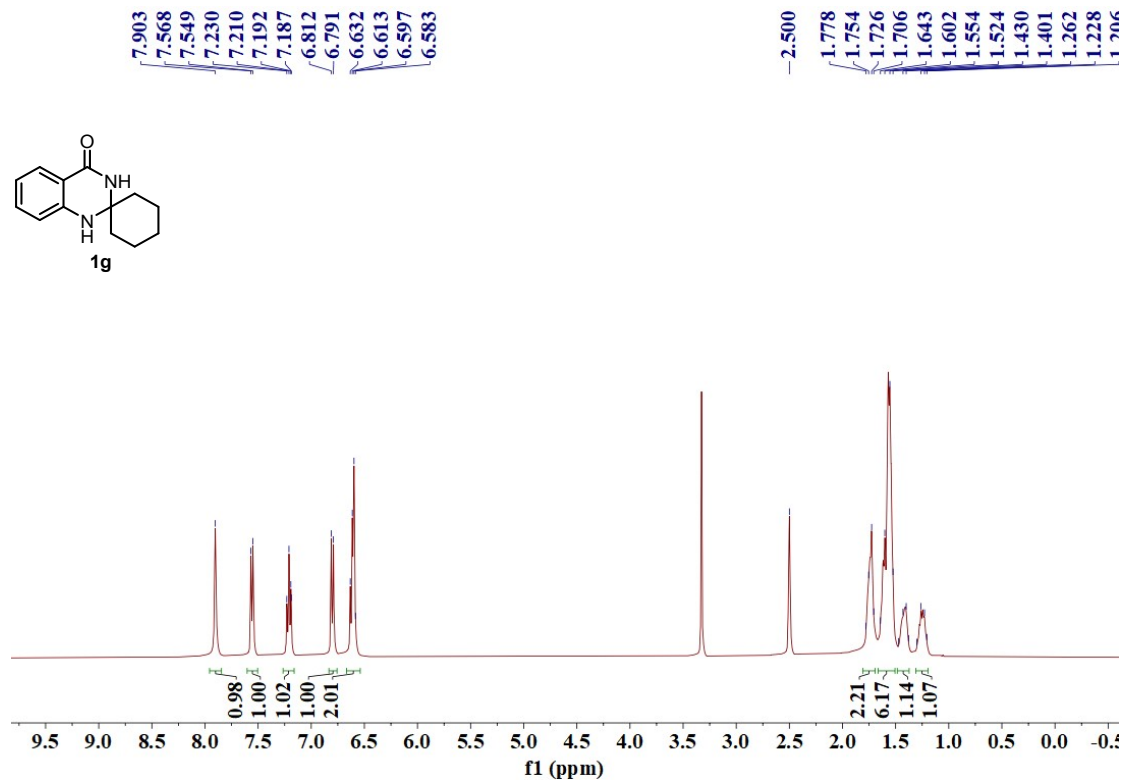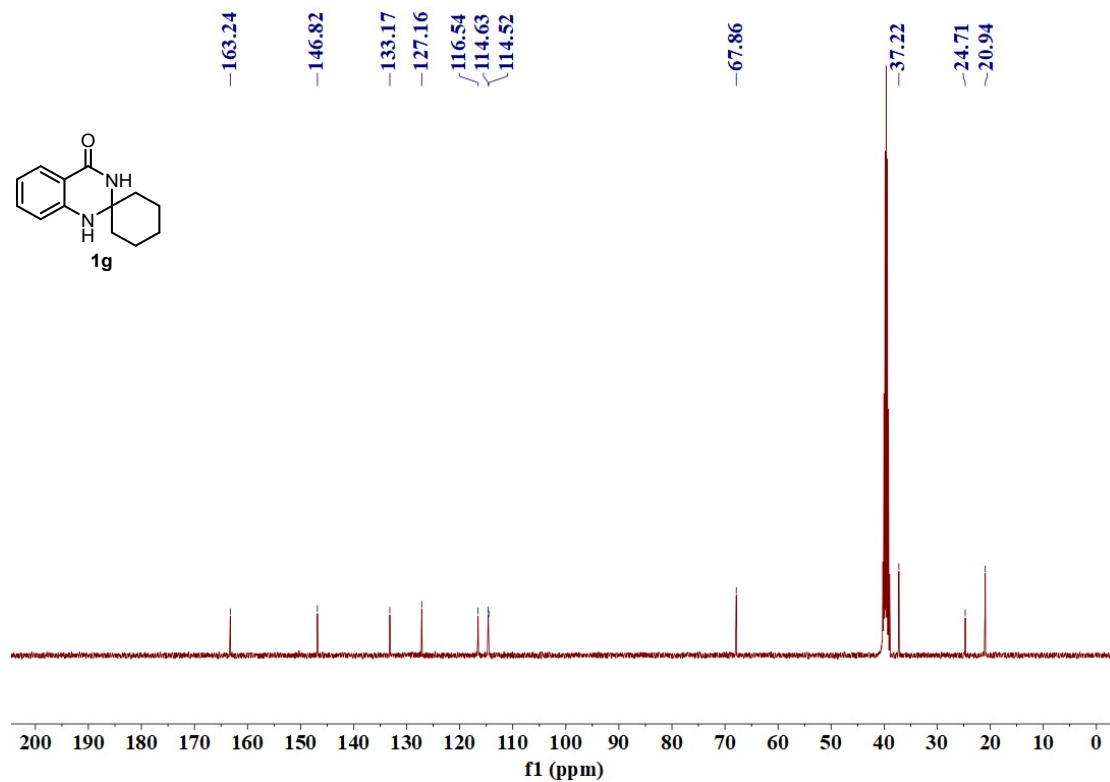



<sup>1</sup>H NMR and <sup>13</sup>C NMR spectra for product 1h (DMSO-d<sub>6</sub>)

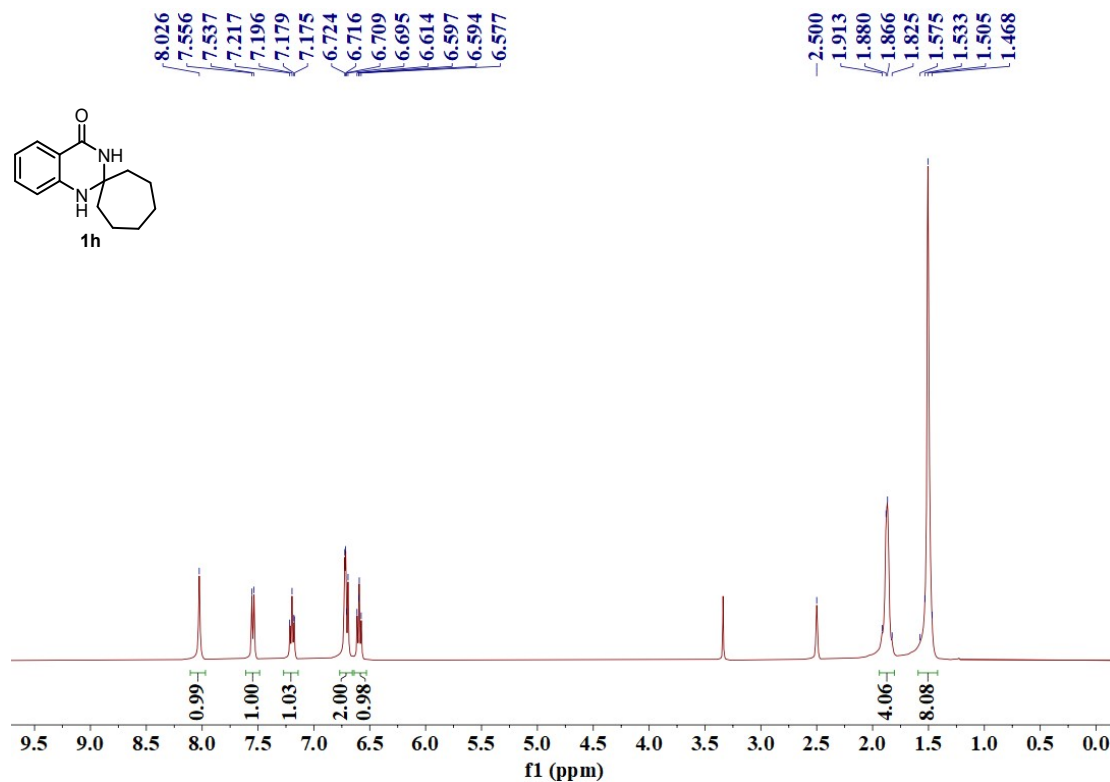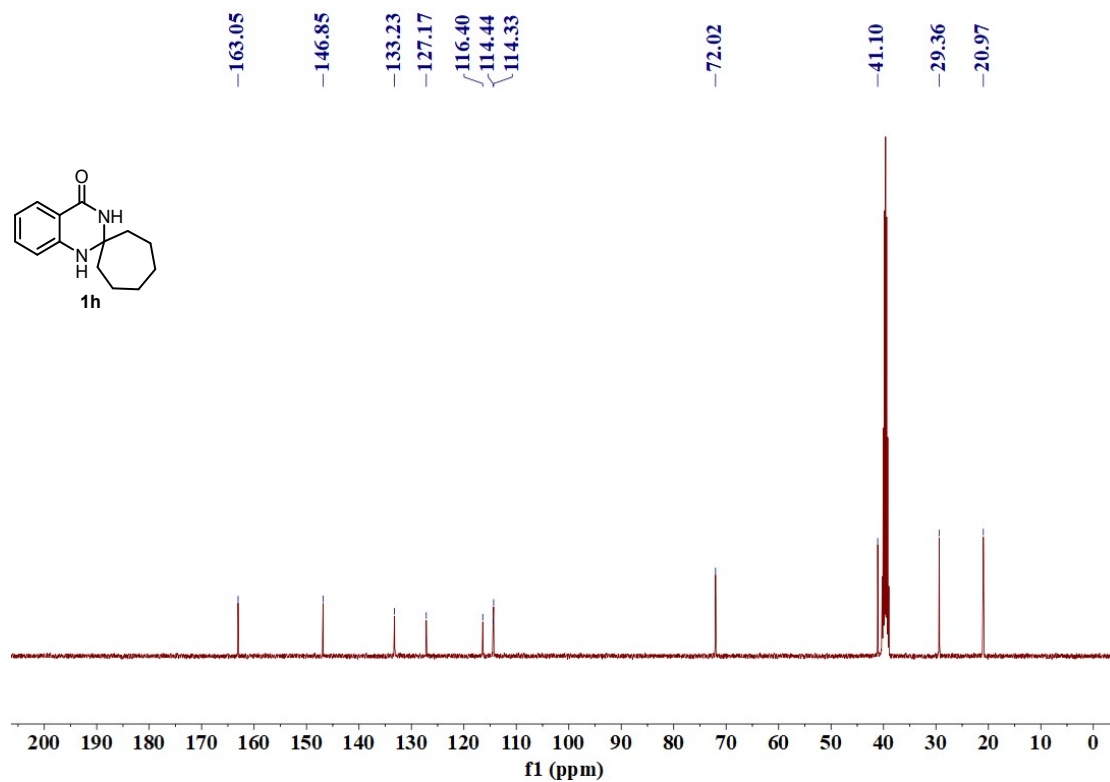

<sup>1</sup>H NMR and <sup>13</sup>C NMR spectra for product 1i (DMSO-d<sub>6</sub>)

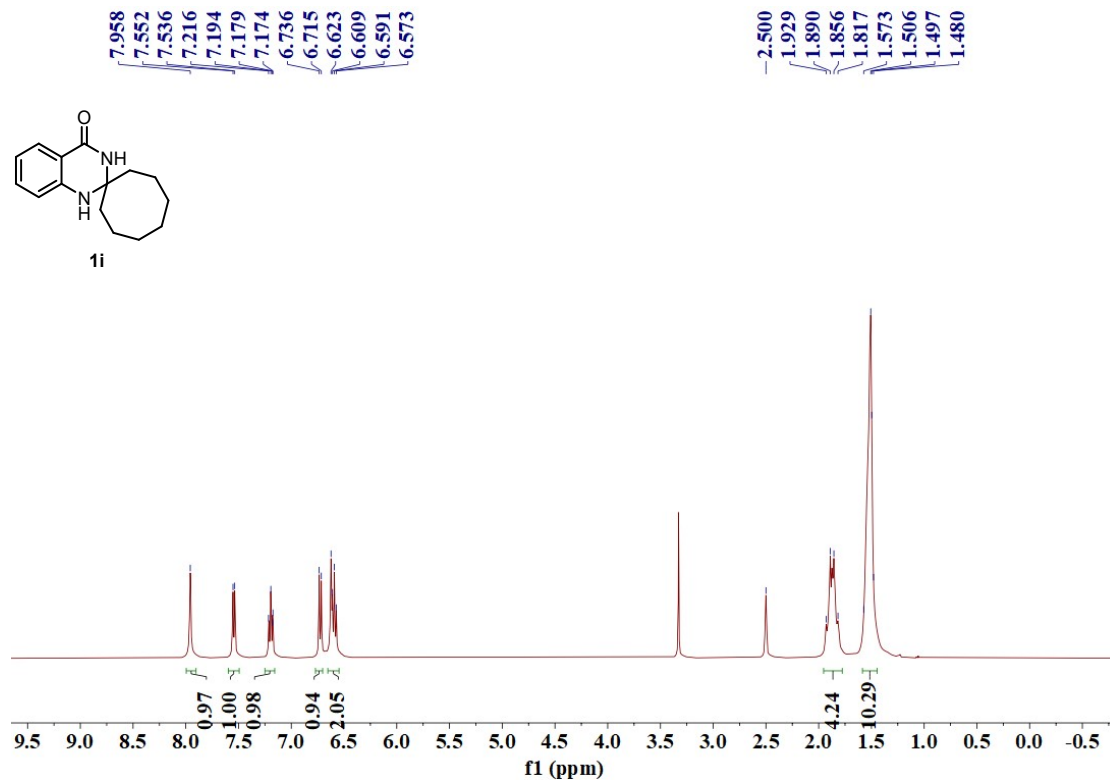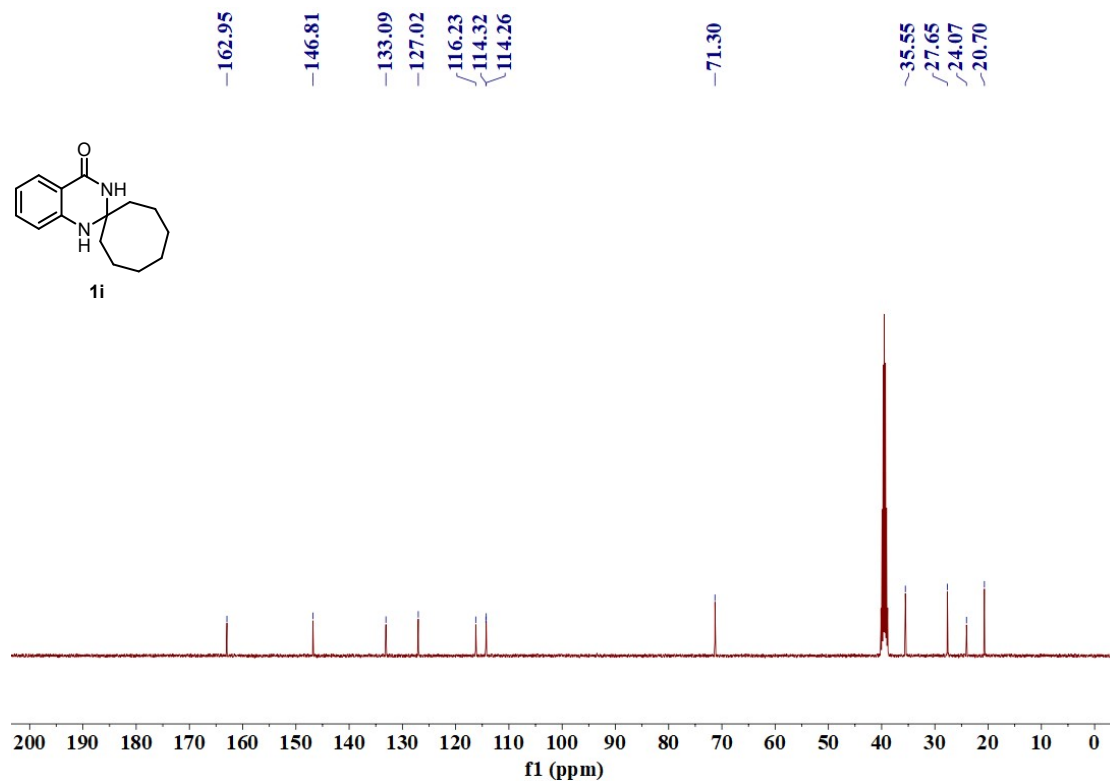

<sup>1</sup>H NMR and <sup>13</sup>C NMR spectra for product 1j (DMSO-d<sub>6</sub>)

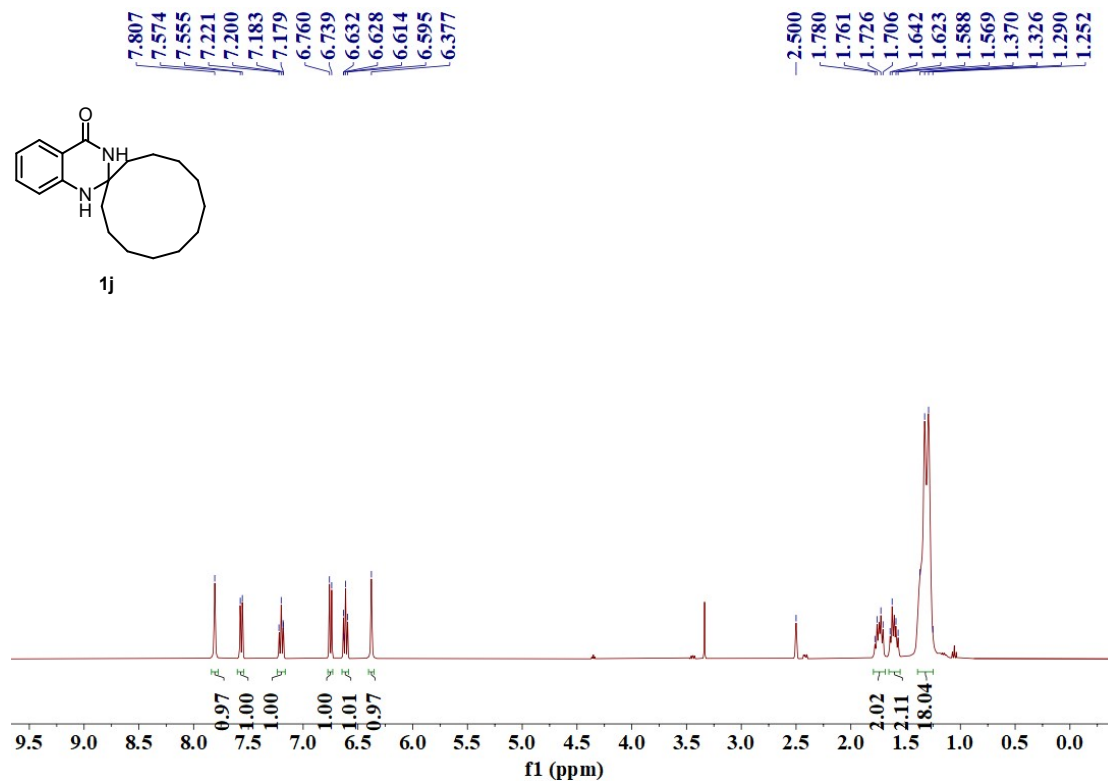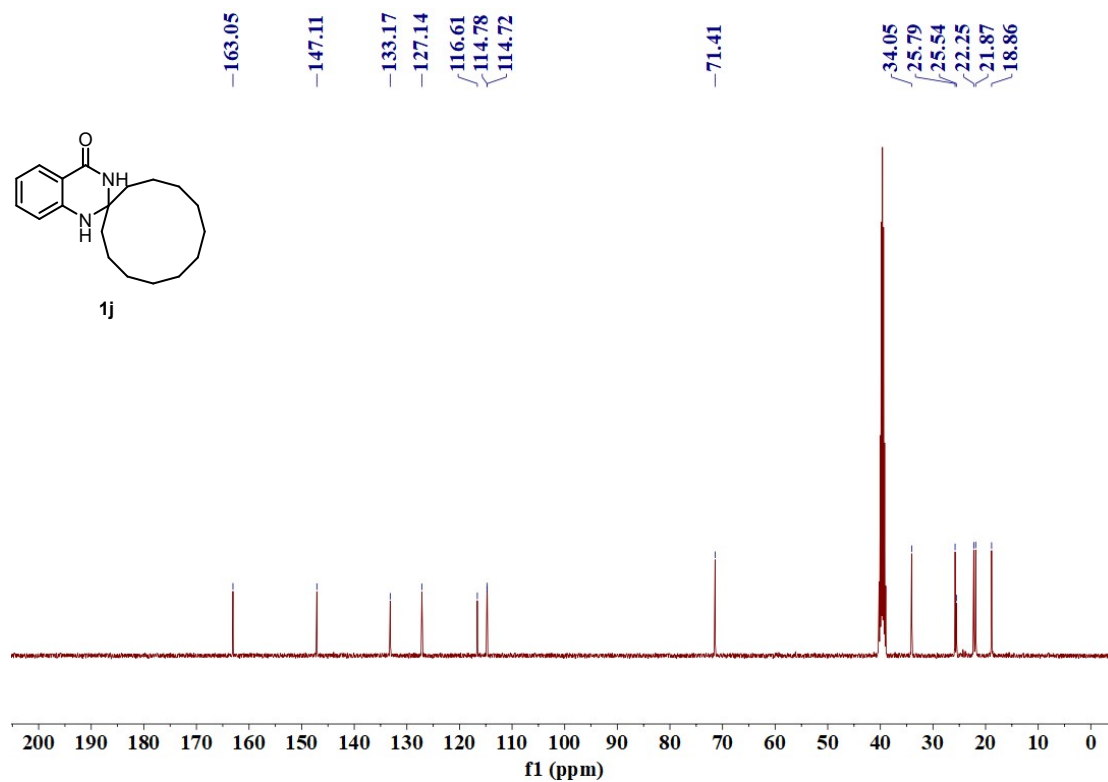

<sup>1</sup>H NMR and <sup>13</sup>C NMR spectra for product 1k (DMSO-d<sub>6</sub>)

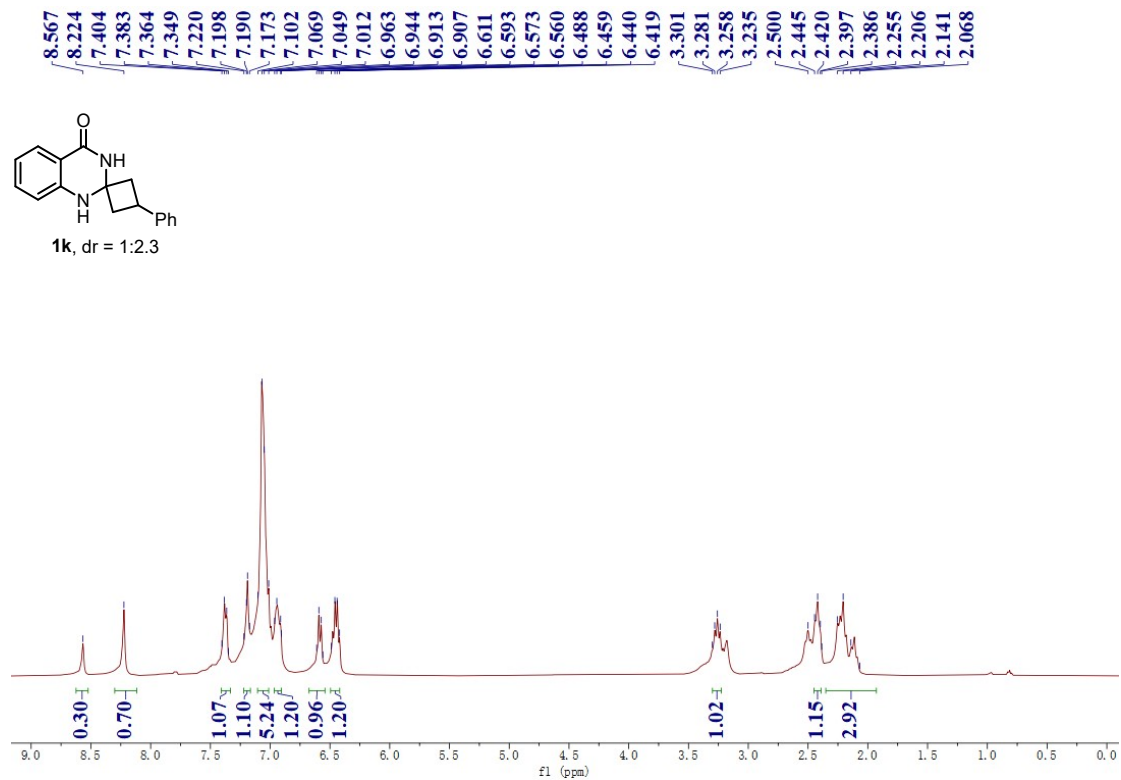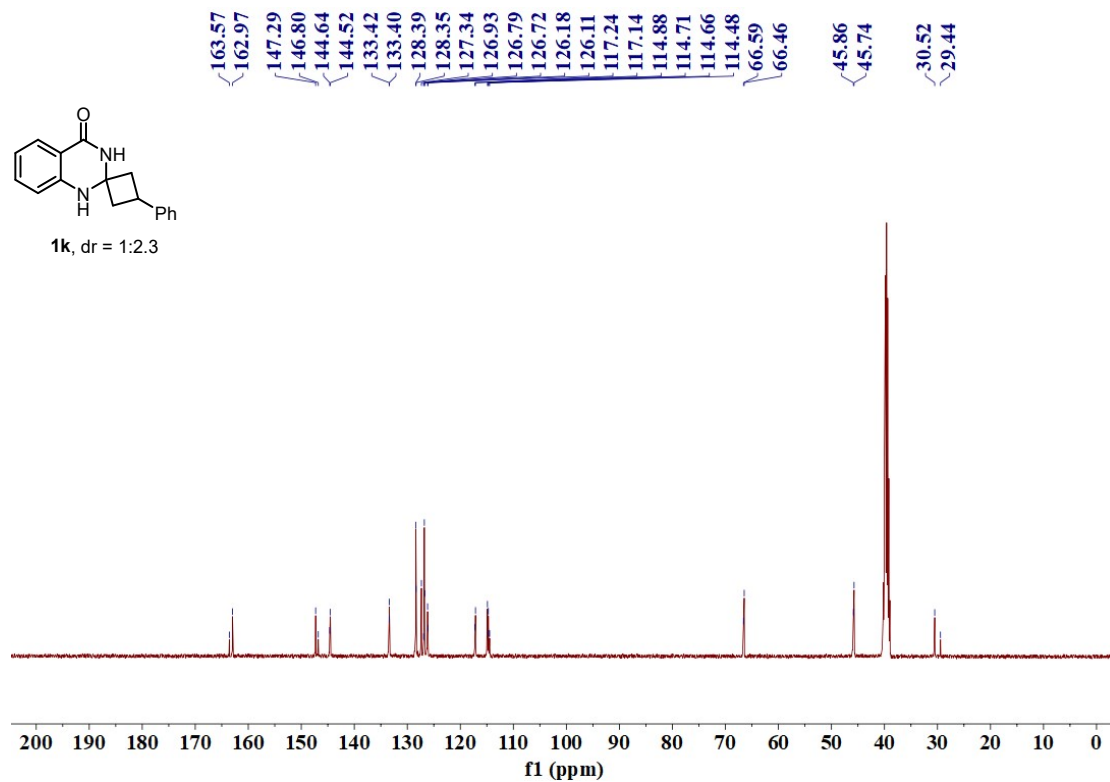

<sup>1</sup>H NMR and <sup>13</sup>C NMR spectra for product **1m** (DMSO-*d*<sub>6</sub>)

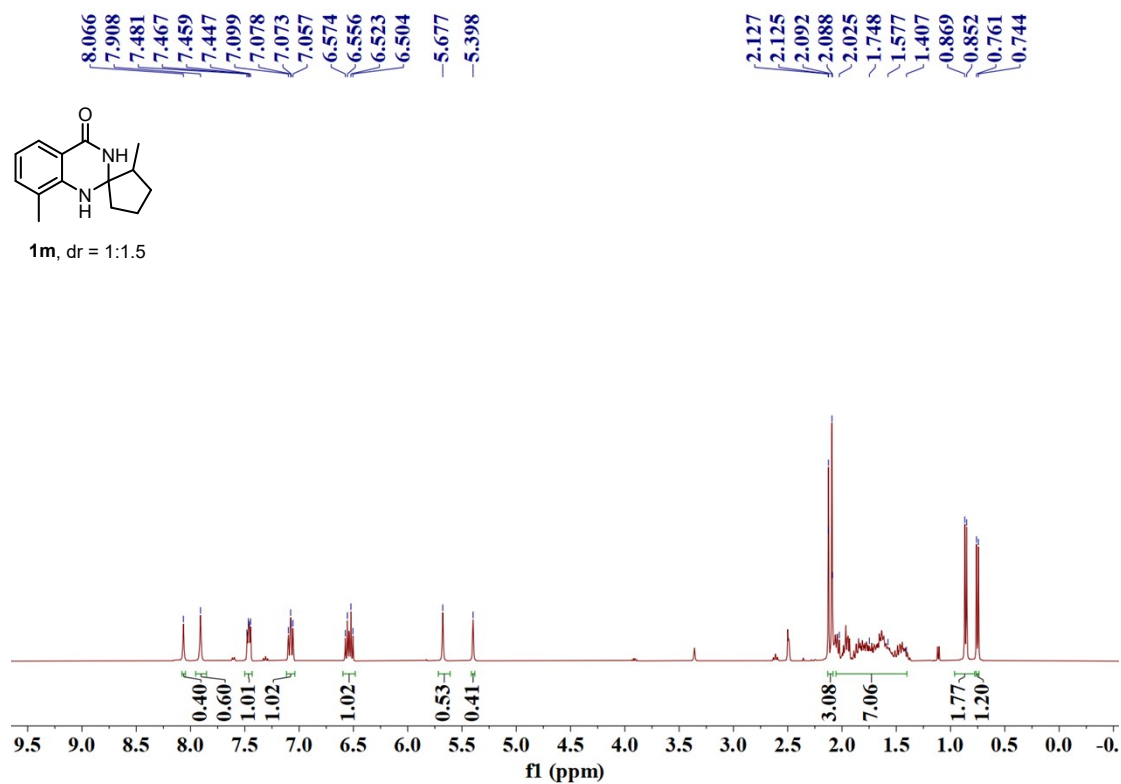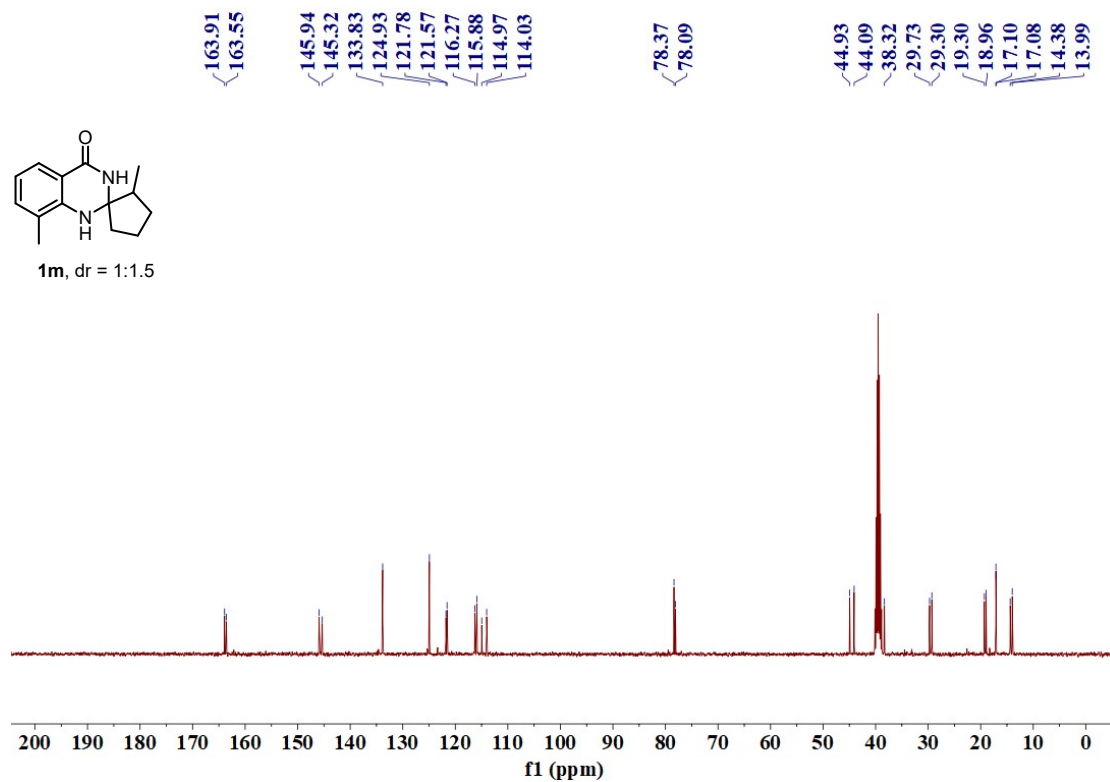

<sup>1</sup>H NMR and <sup>13</sup>C NMR spectra for product **1n** (DMSO-*d*<sub>6</sub>)

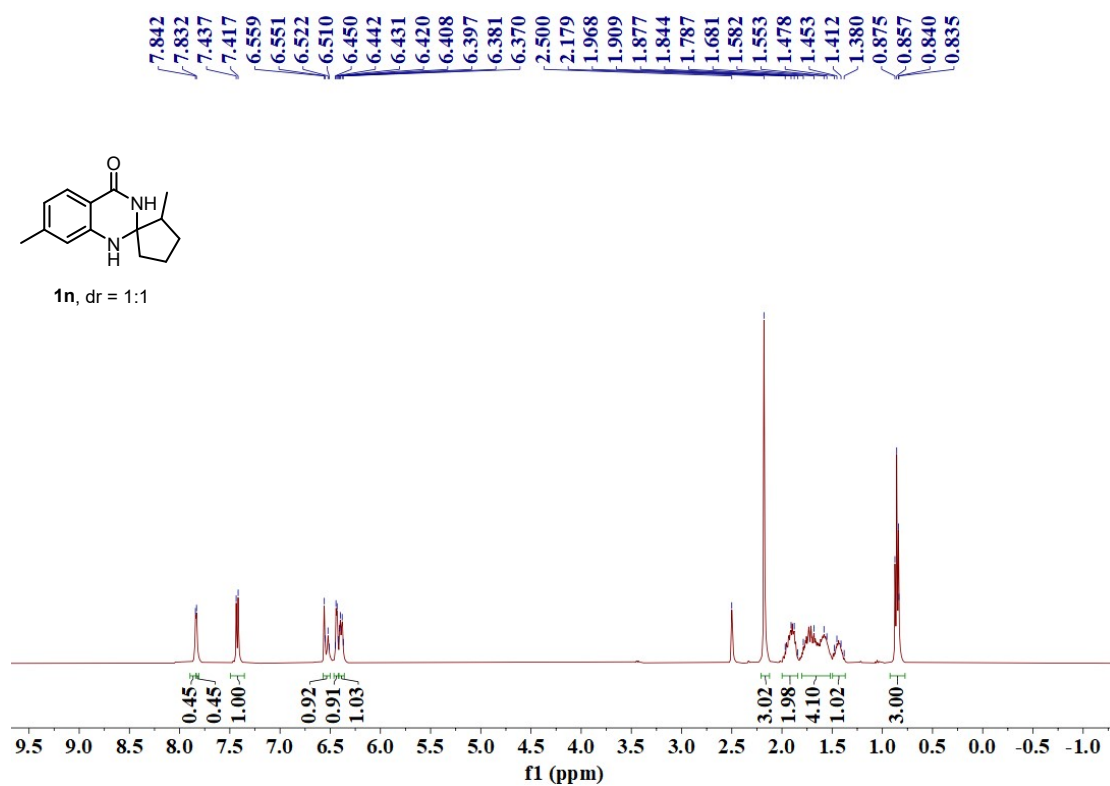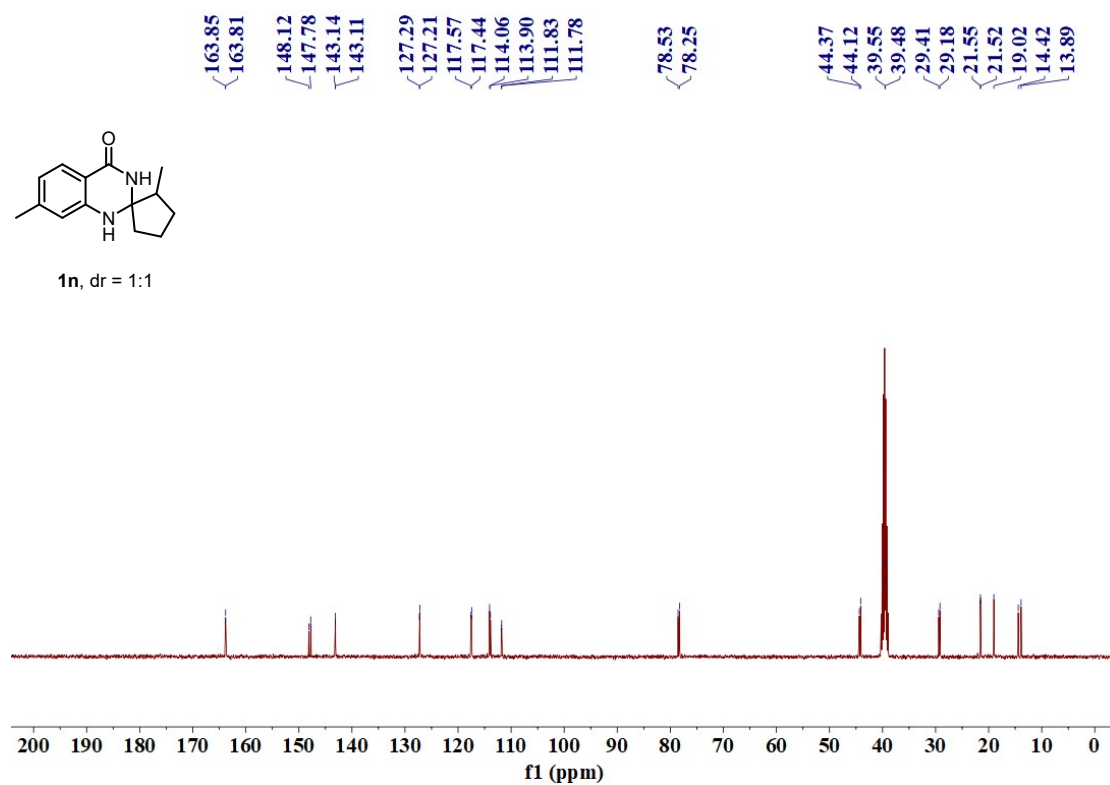

<sup>1</sup>H NMR and <sup>13</sup>C NMR spectra for product 1n (DMSO-d<sub>6</sub>)

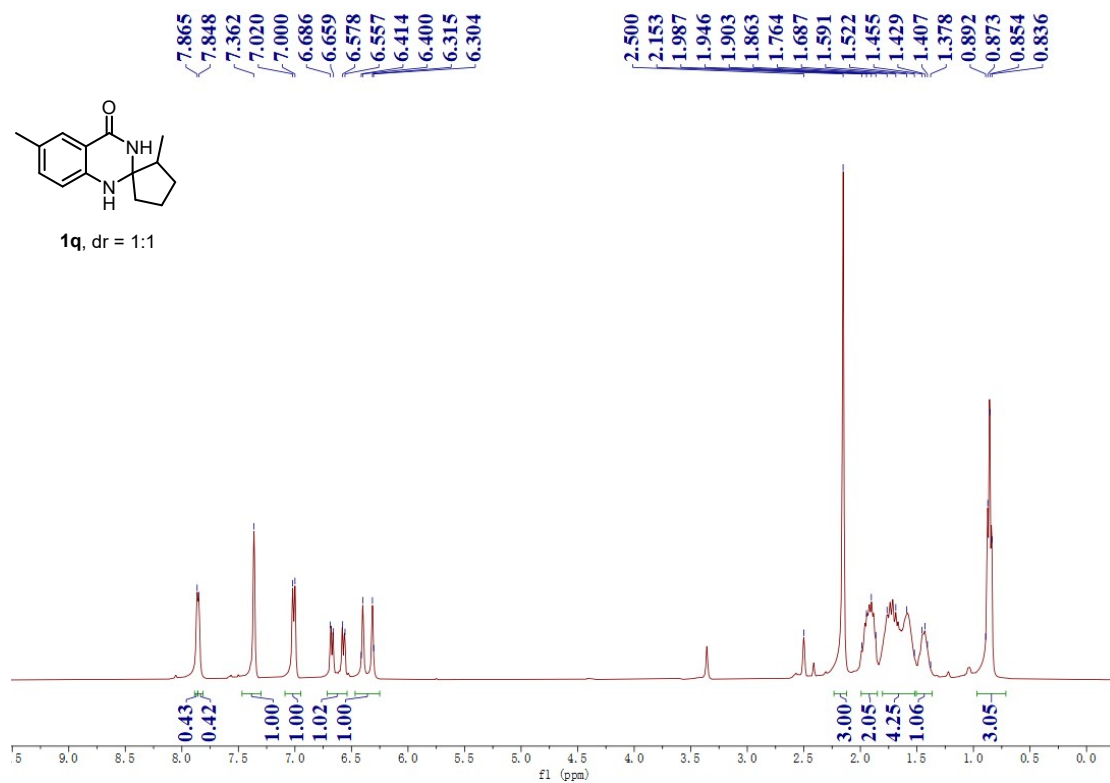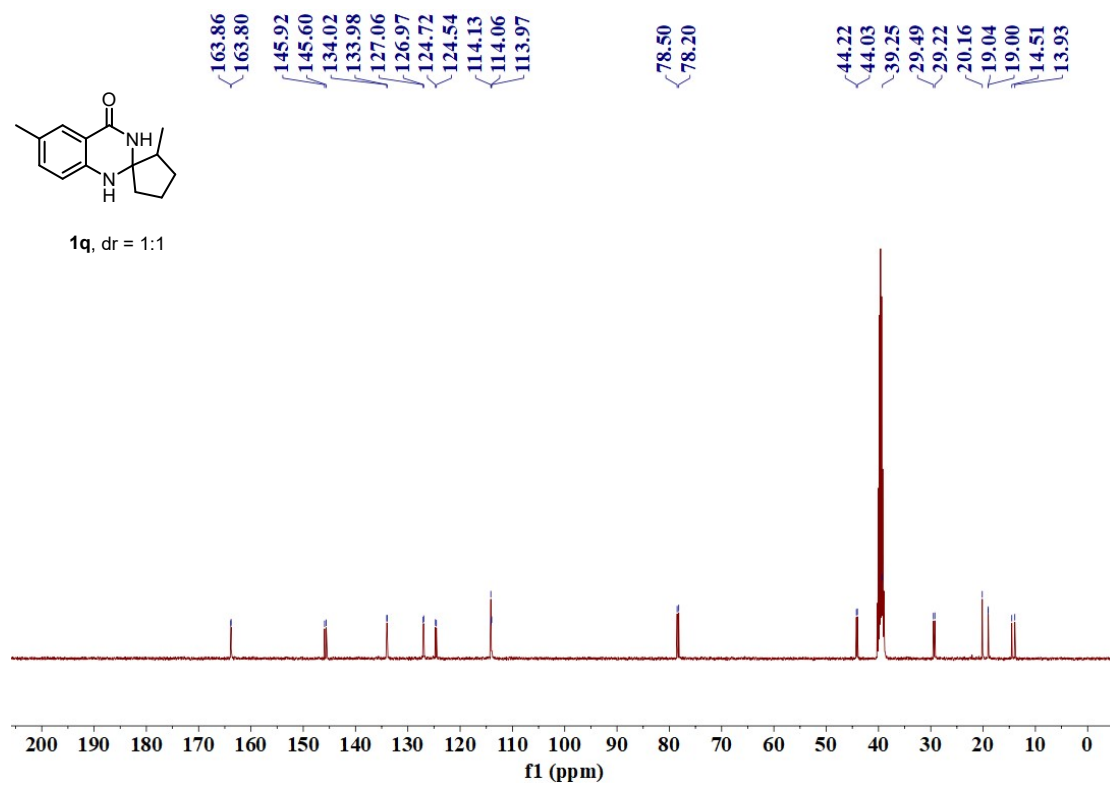

<sup>1</sup>H NMR and <sup>13</sup>C NMR spectra for product 1w (CDCl<sub>3</sub>)

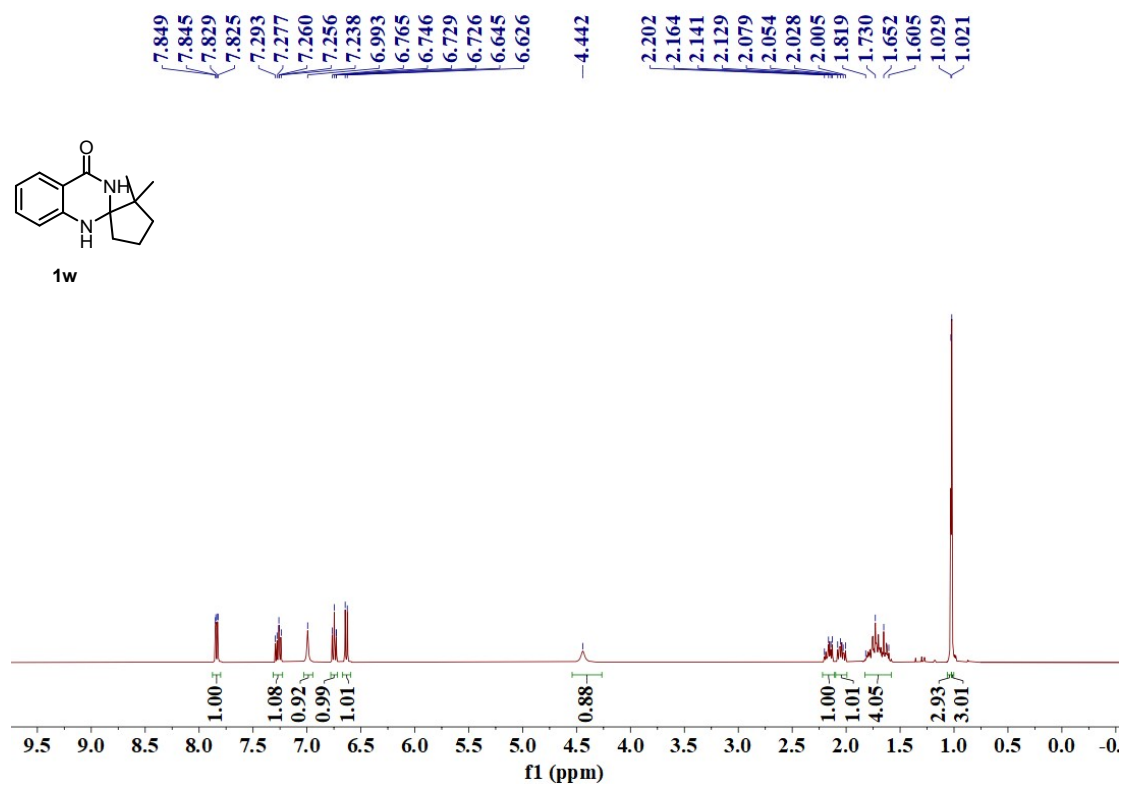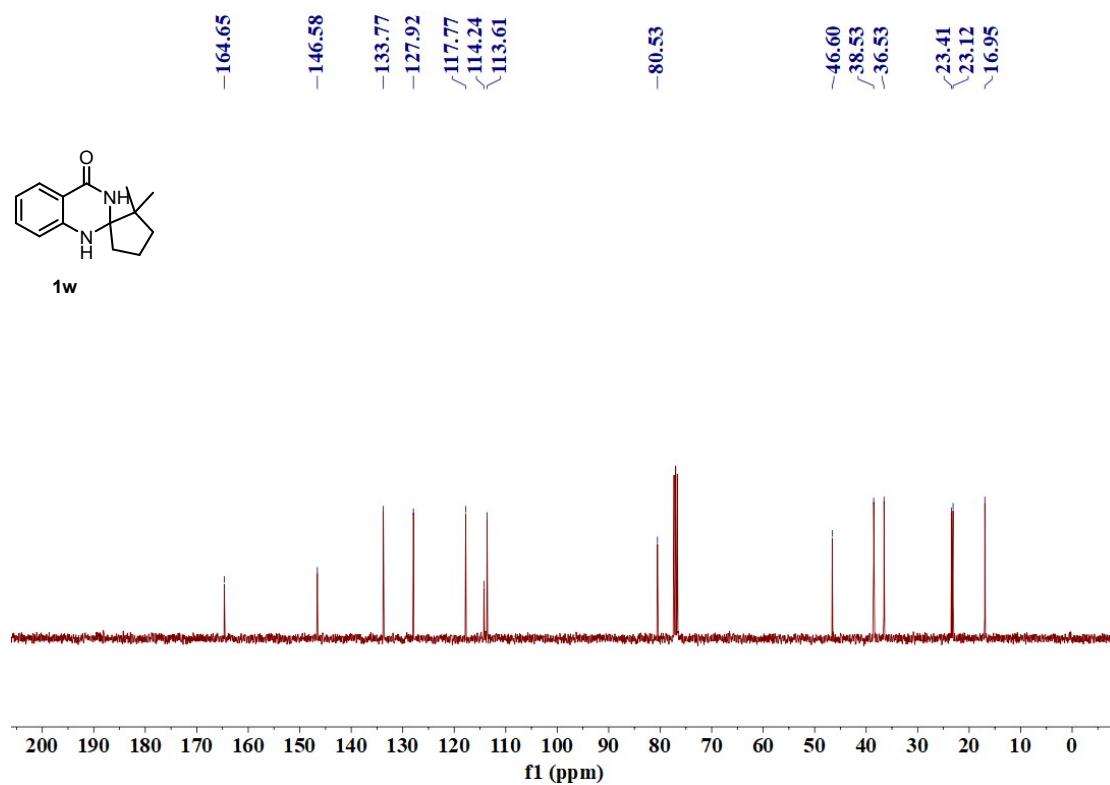



<sup>1</sup>H NMR and <sup>13</sup>C NMR spectra for product 1y (DMSO-d<sub>6</sub>)

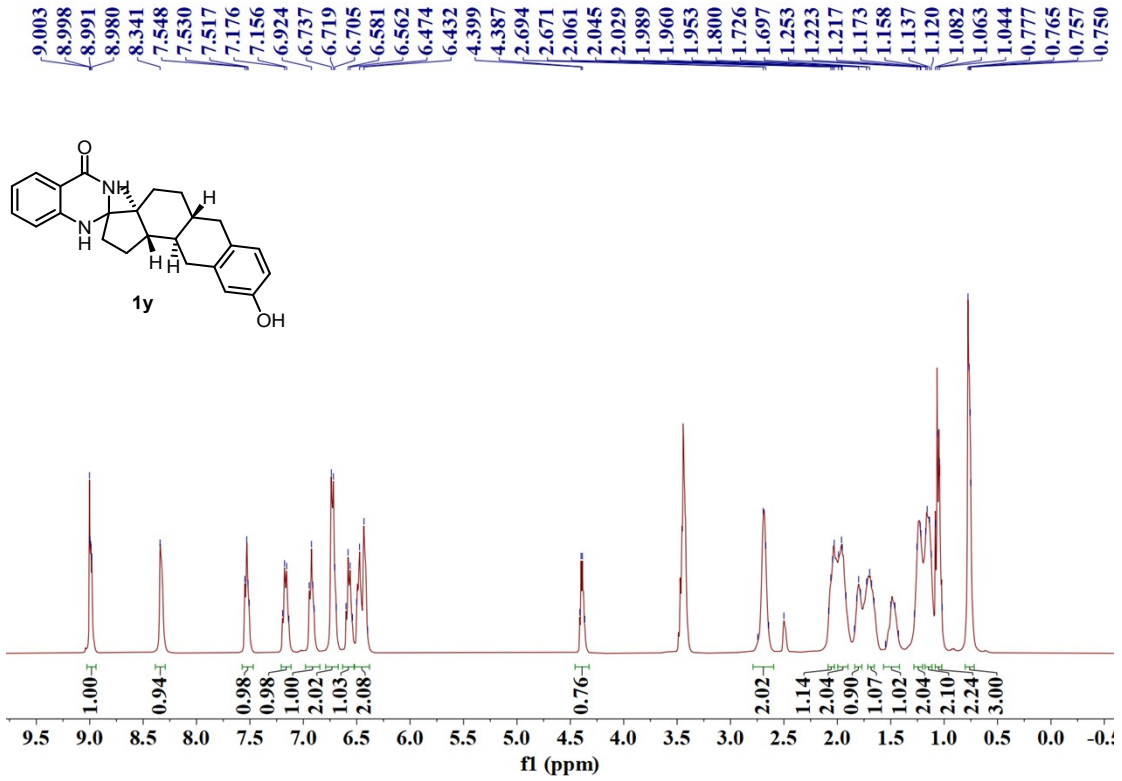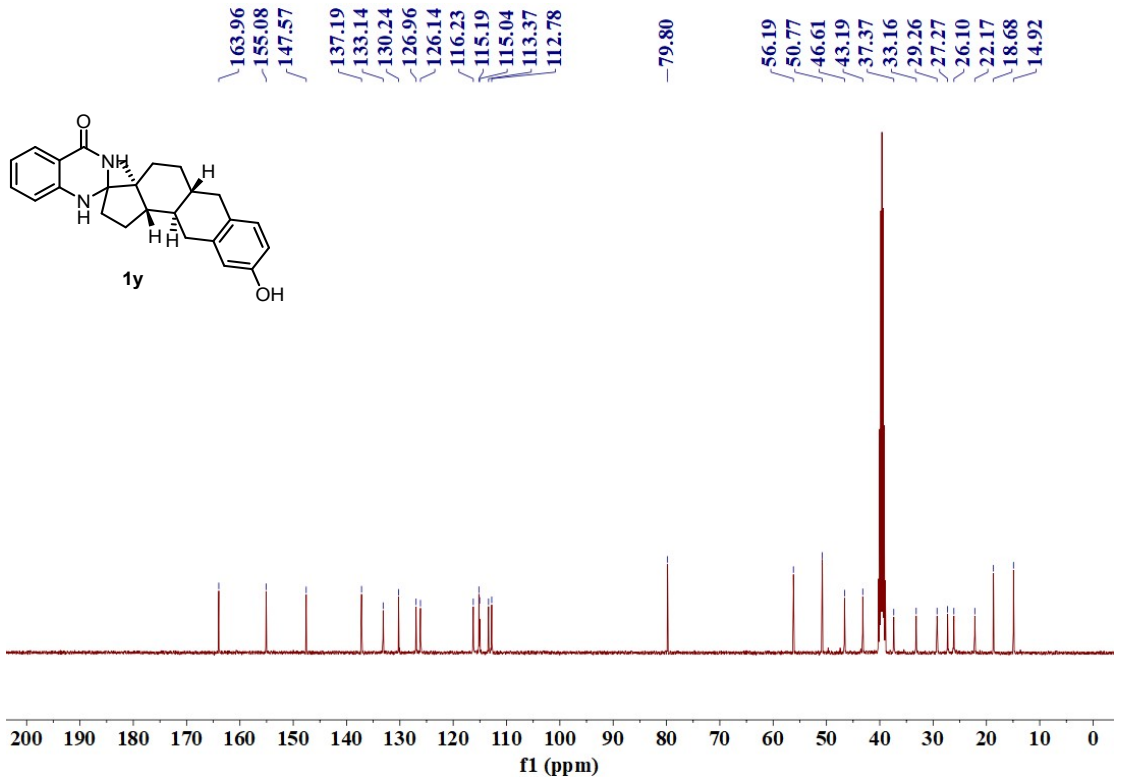

<sup>1</sup>H NMR, <sup>13</sup>C NMR and <sup>19</sup>F NMR spectra for product 3a (Chloroform-*d*)

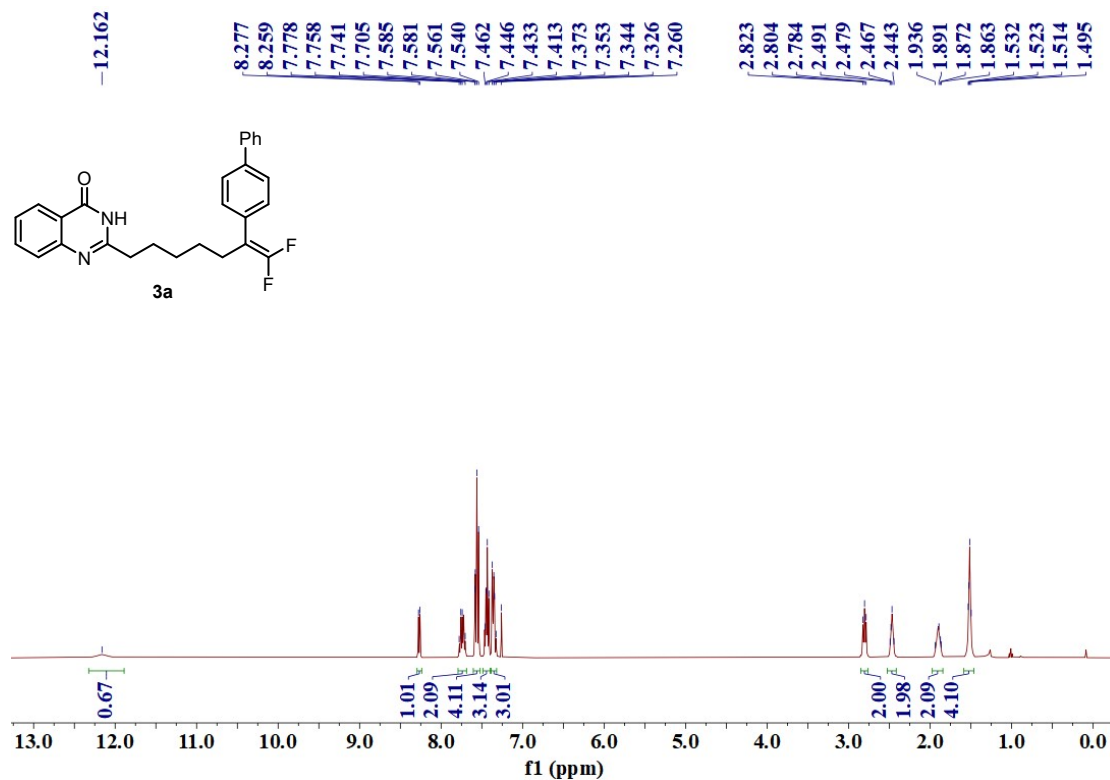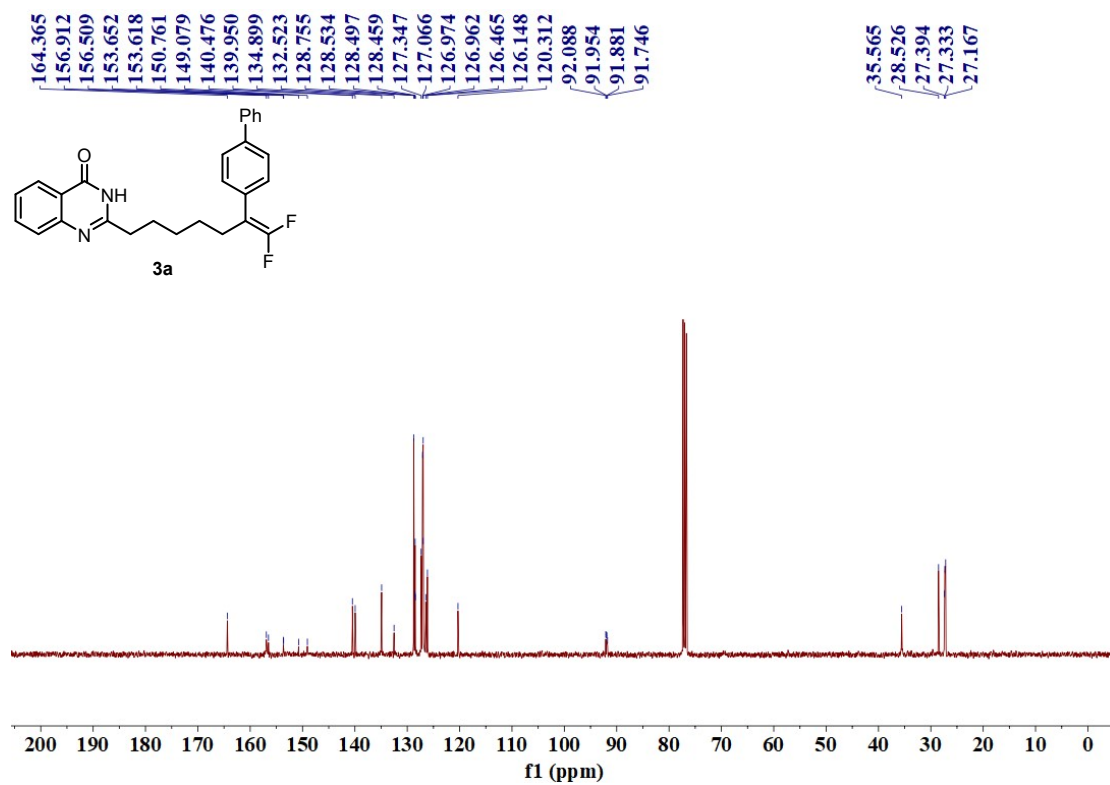

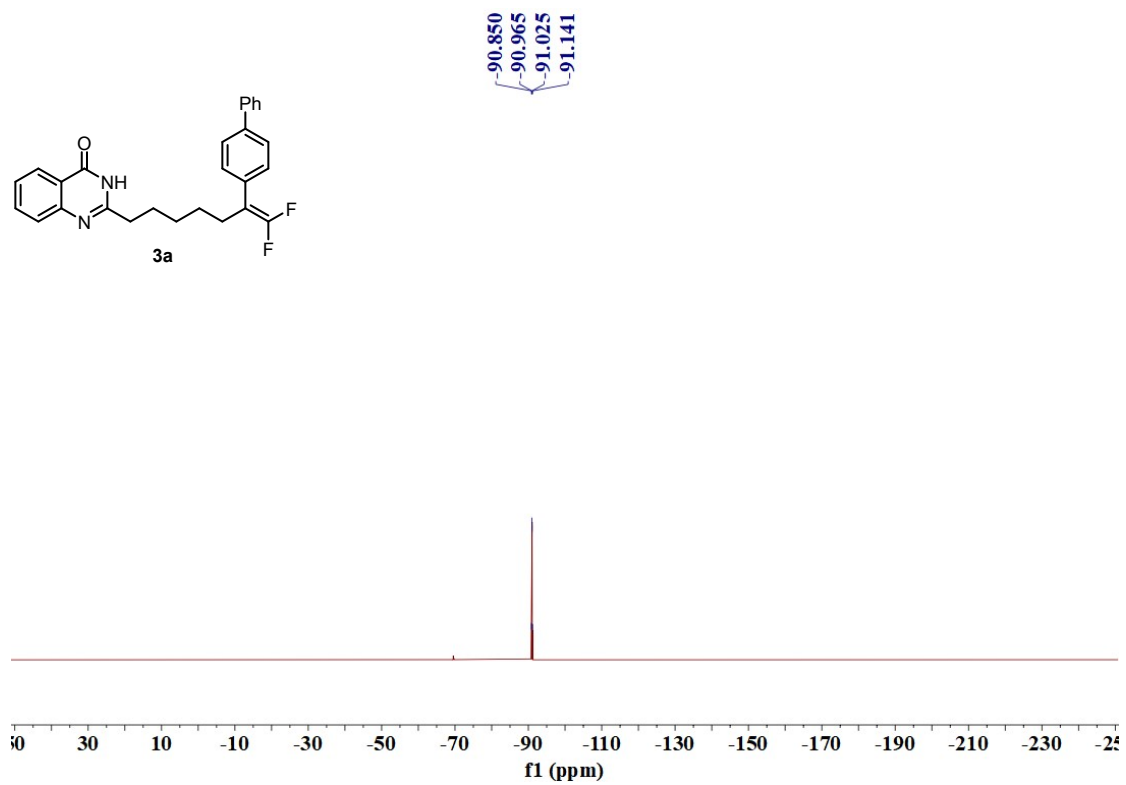

**$^1\text{H}$  NMR,  $^{13}\text{C}$  NMR and  $^{19}\text{F}$  NMR spectra for product 3b (Chloroform-*d*)**

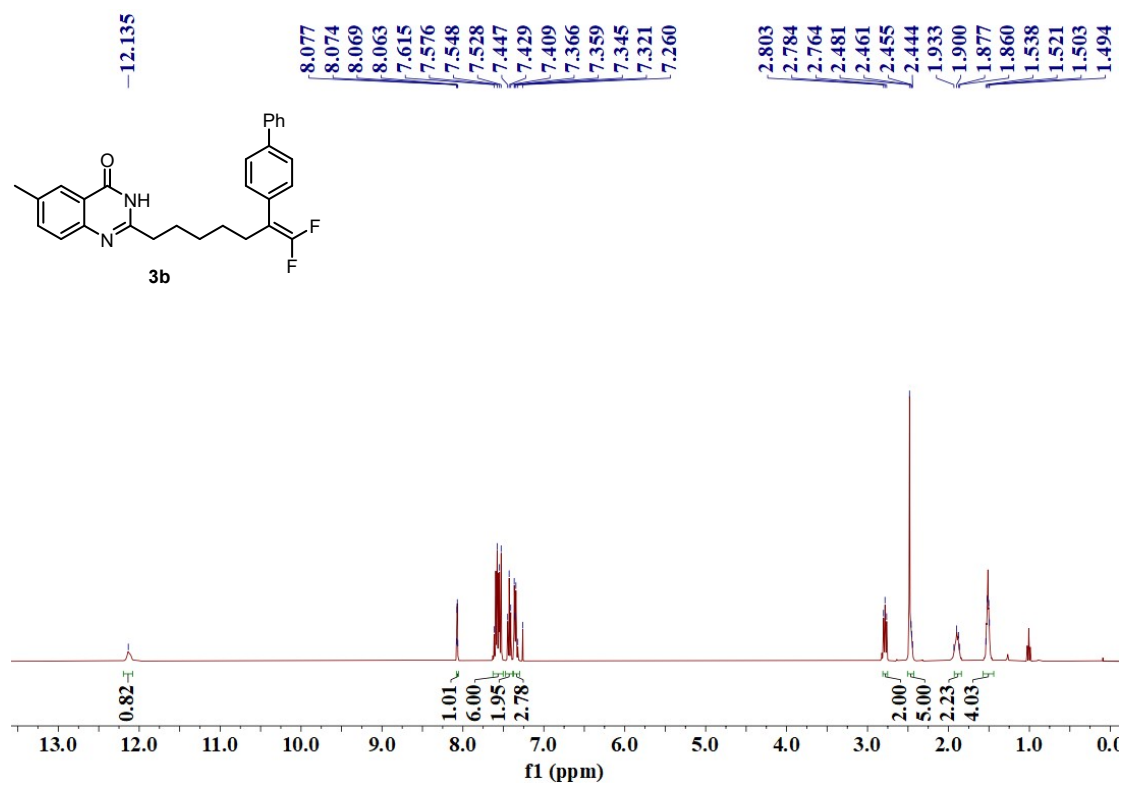

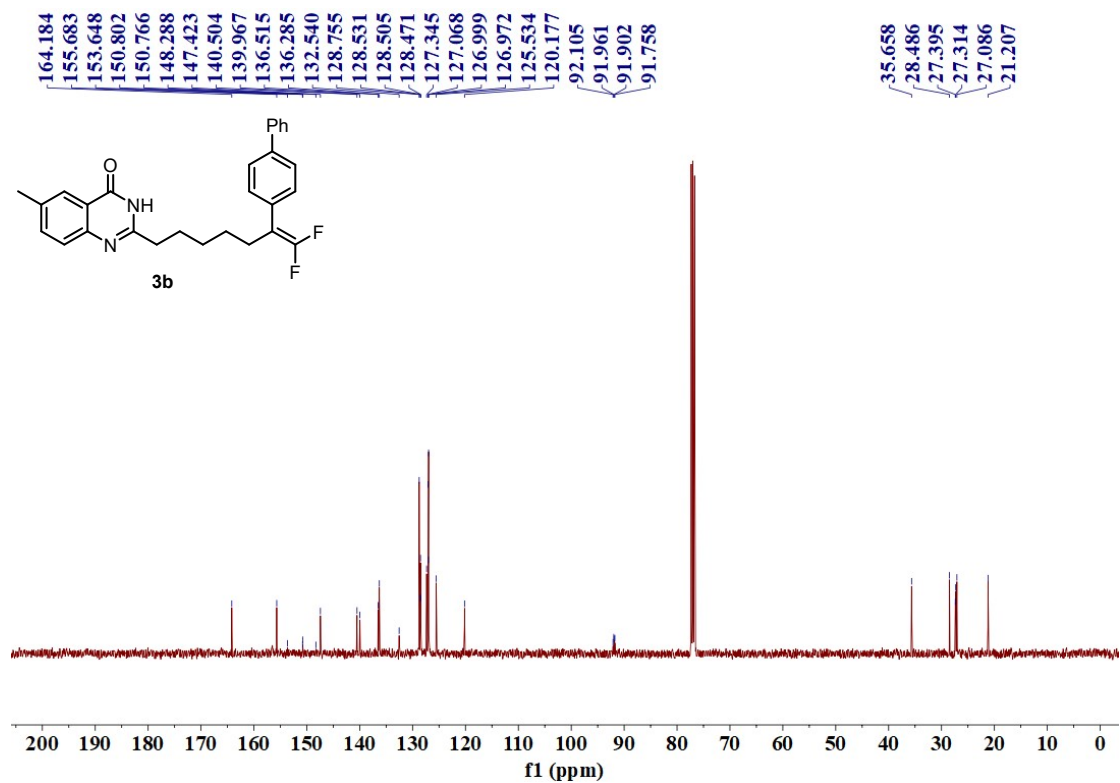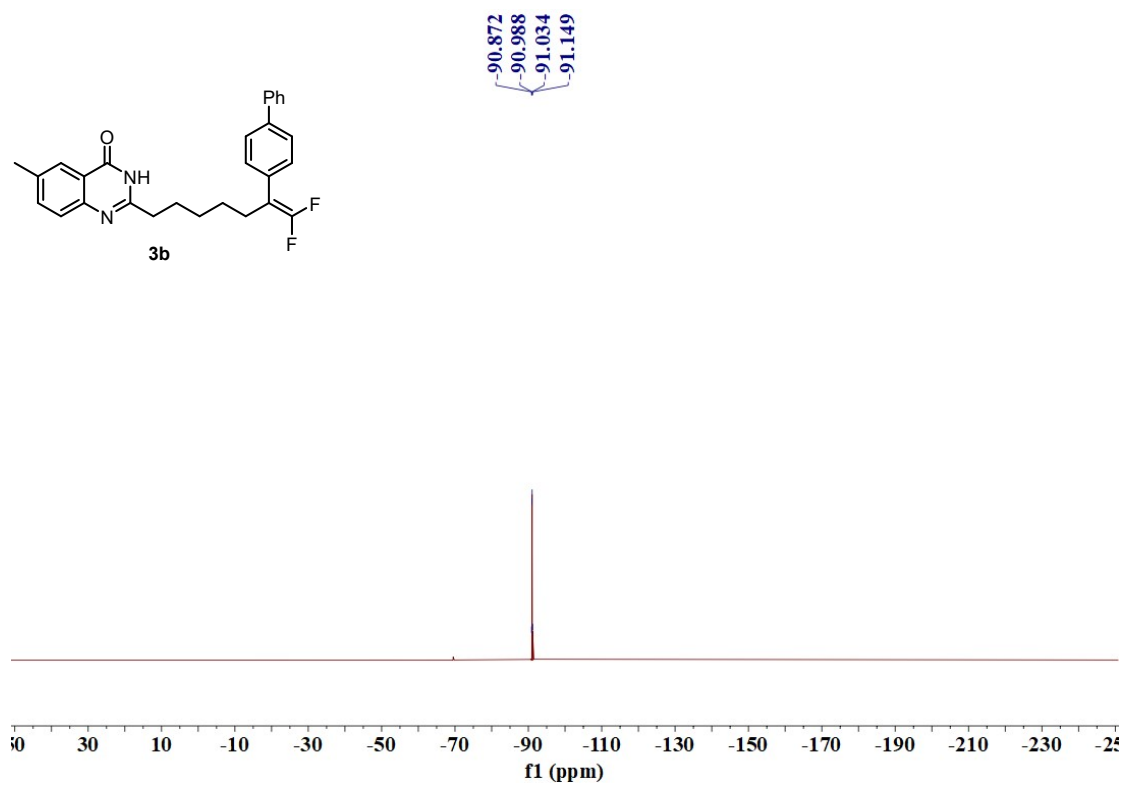

<sup>1</sup>H NMR, <sup>13</sup>C NMR and <sup>19</sup>F NMR spectra for product 3c (DMSO-d<sub>6</sub>)

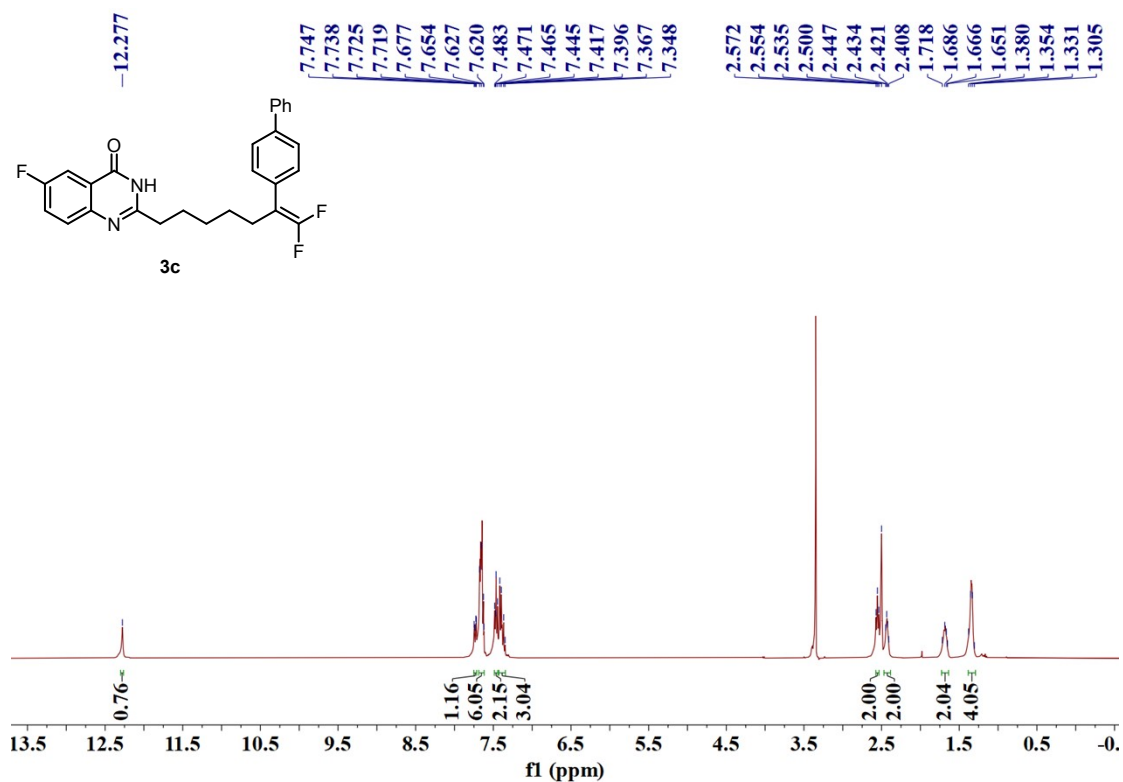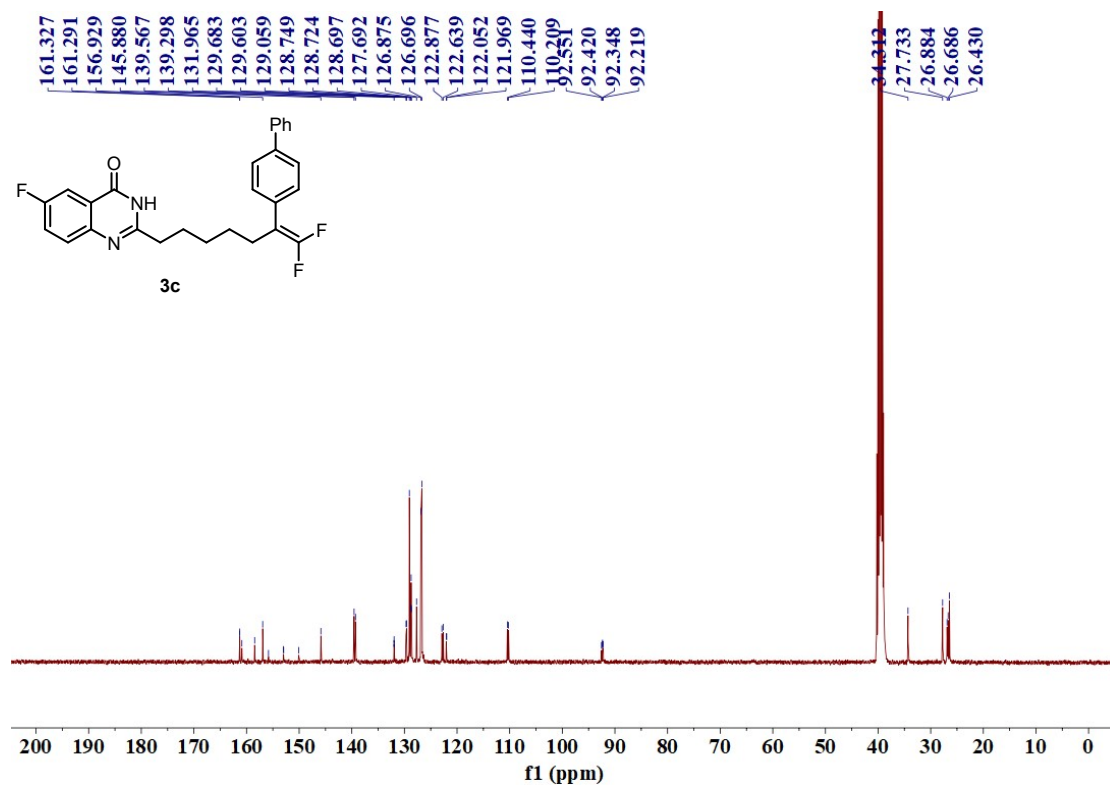

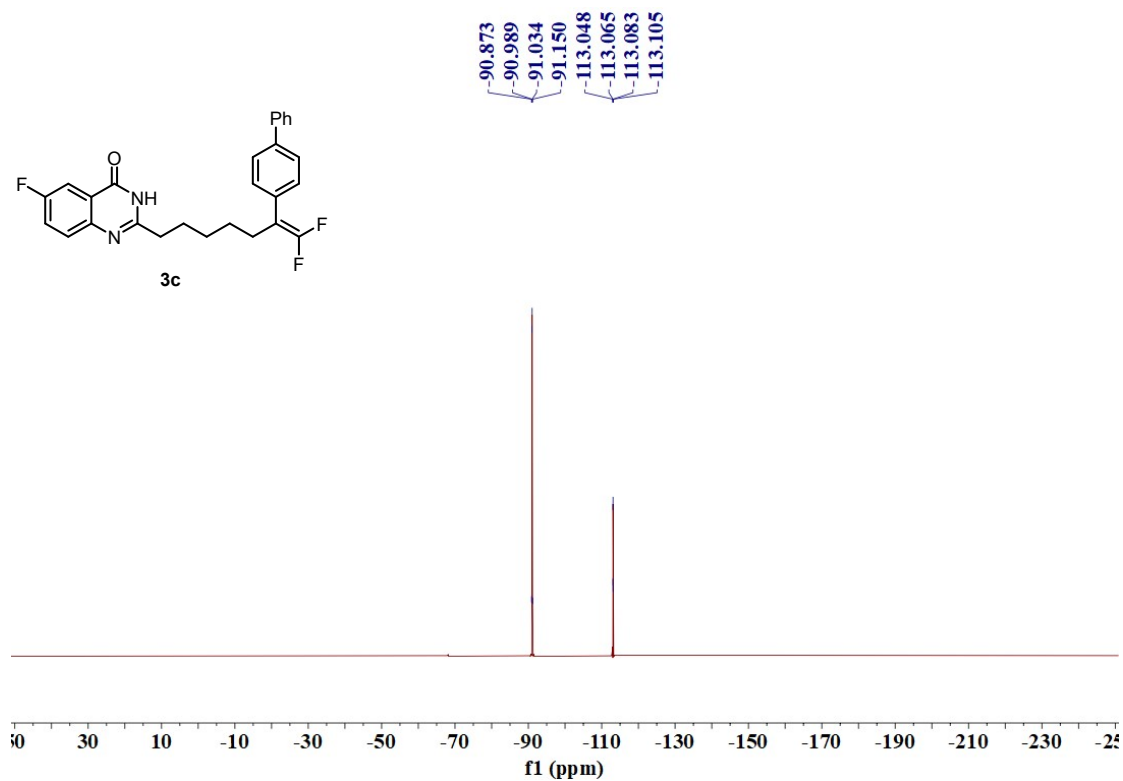

$^1\text{H}$  NMR,  $^{13}\text{C}$  NMR and  $^{19}\text{F}$  NMR spectra for product **3d** (DMSO- $d_6$ )

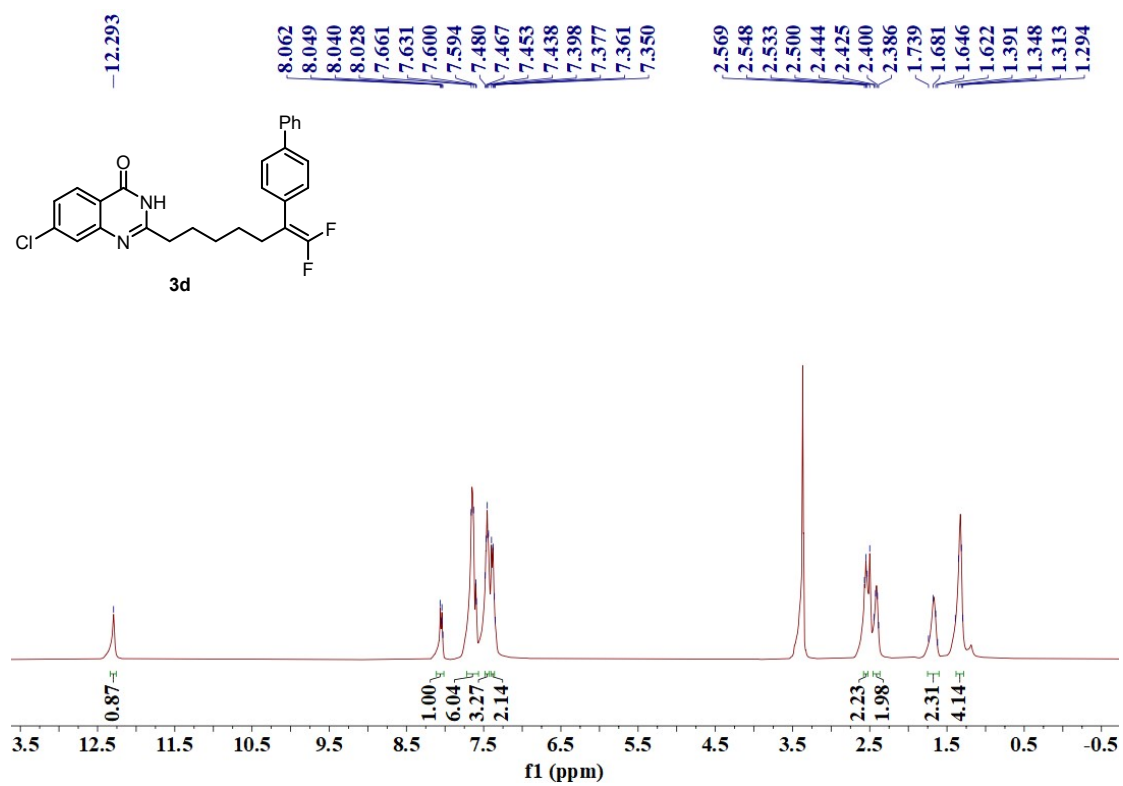

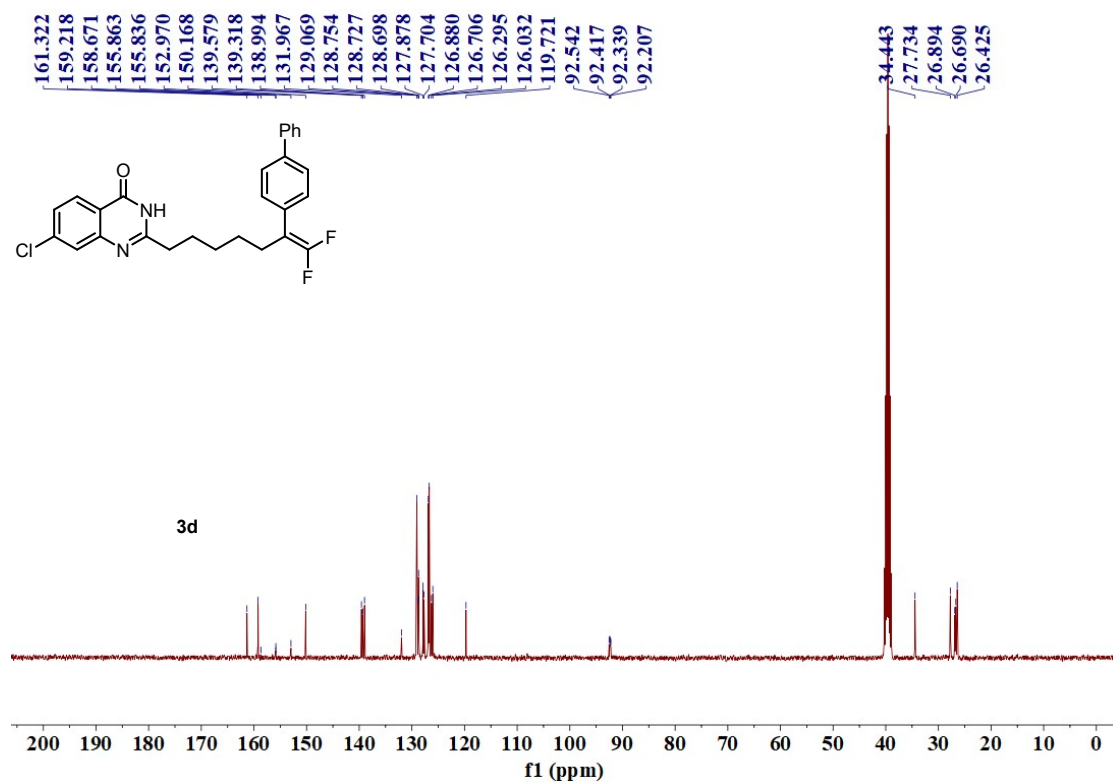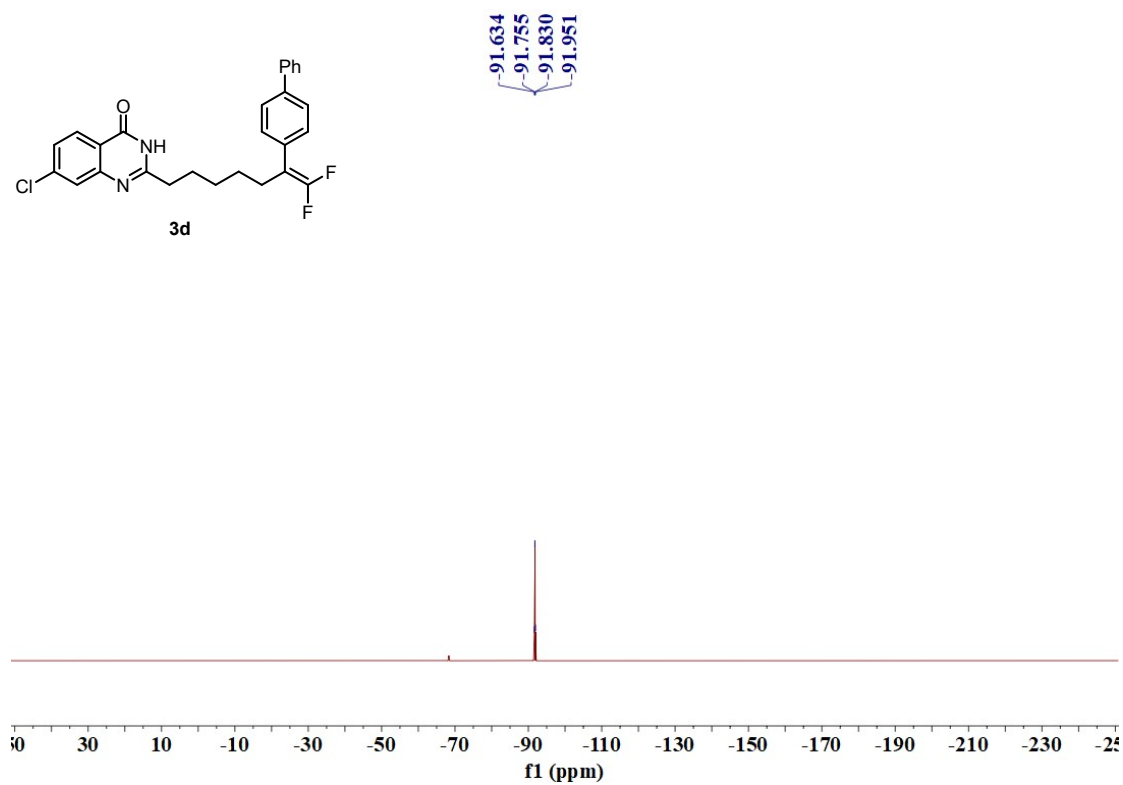

<sup>1</sup>H NMR, <sup>13</sup>C NMR and <sup>19</sup>F NMR spectra for product 3e (DMSO-*d*<sub>6</sub>)

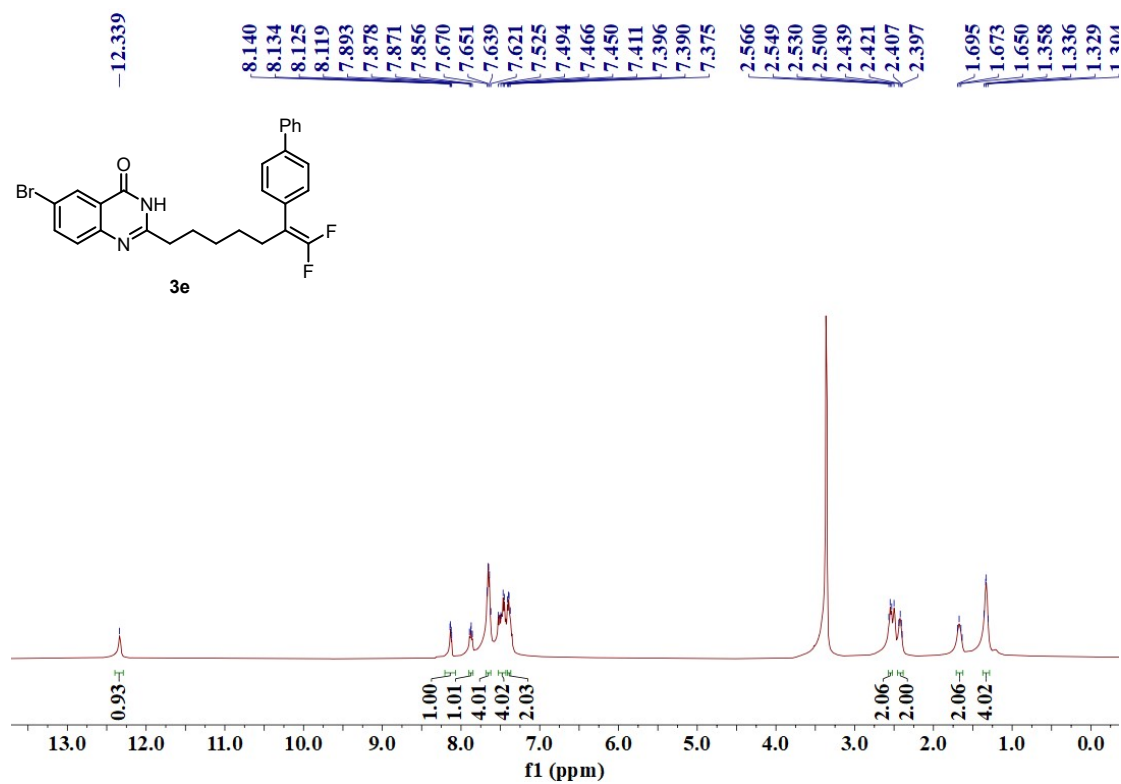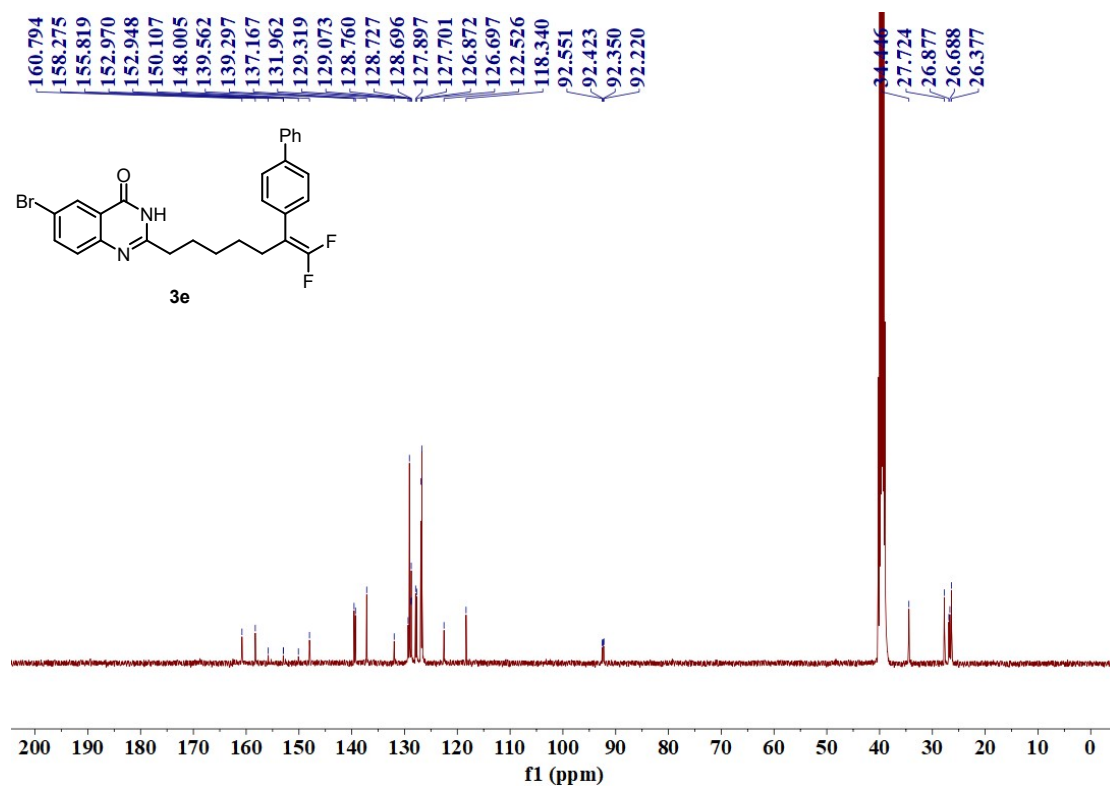



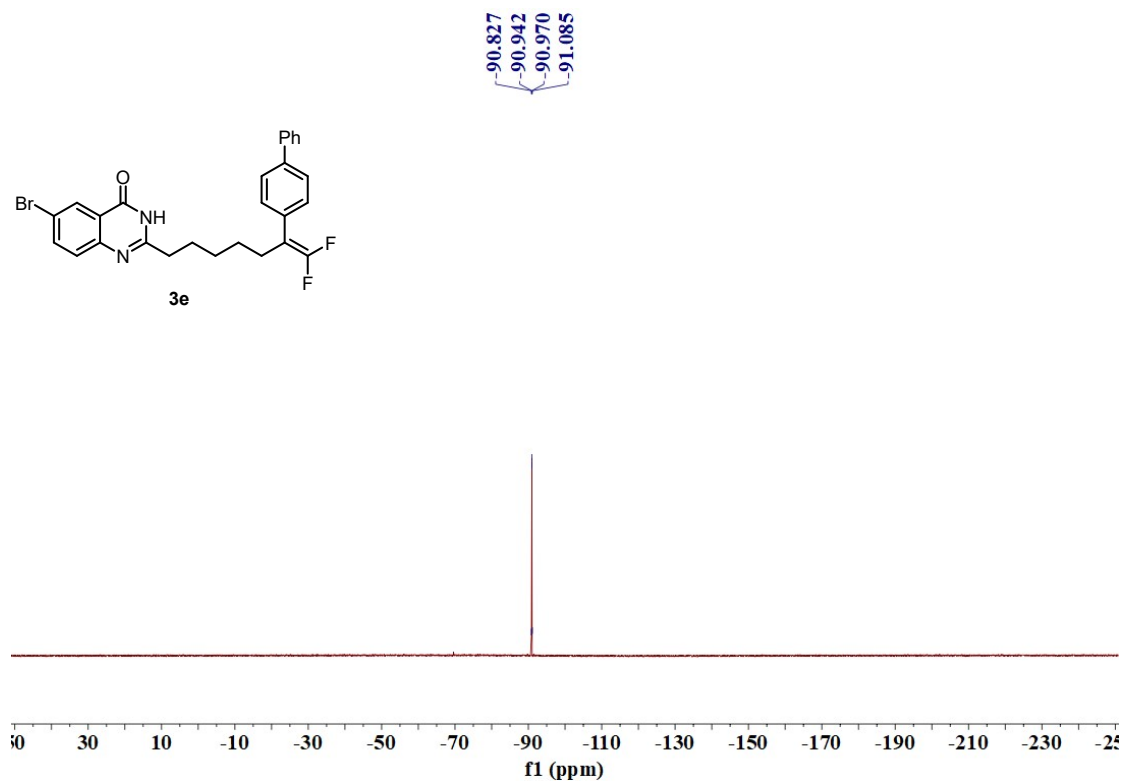

**$^1\text{H}$  NMR,  $^{13}\text{C}$  NMR and  $^{19}\text{F}$  NMR spectra for product 3f (Chloroform-*d*)**

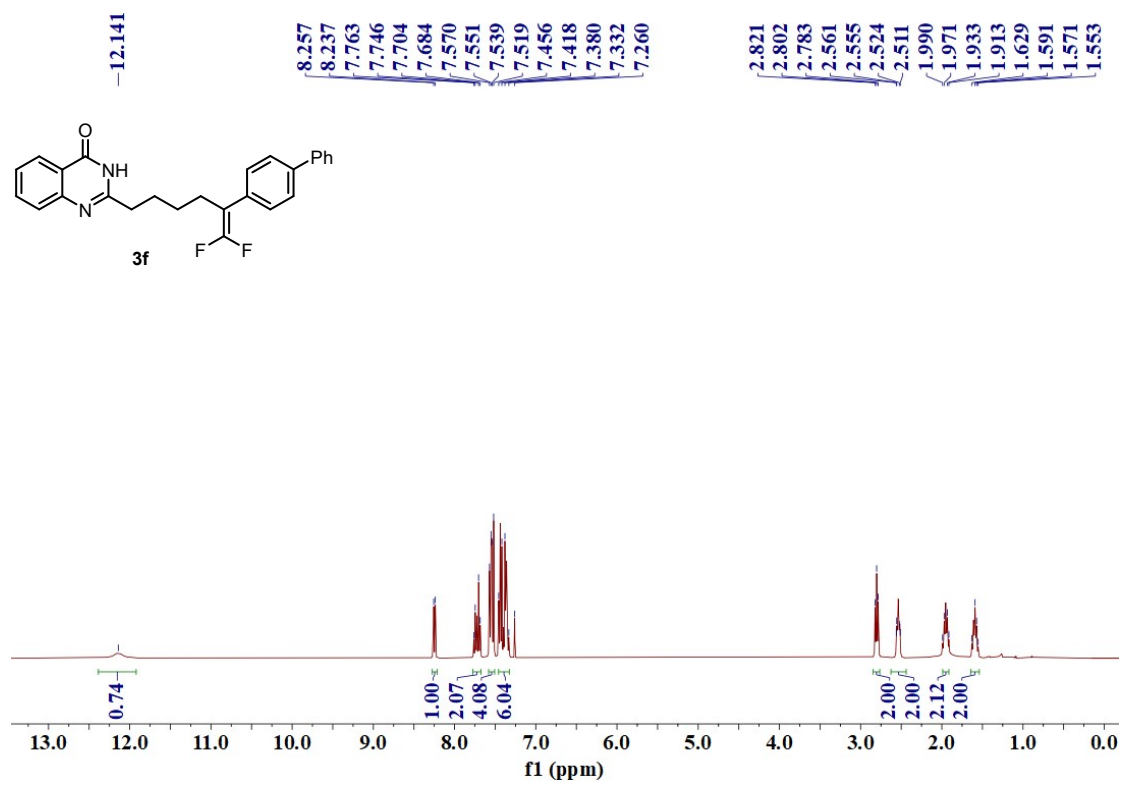

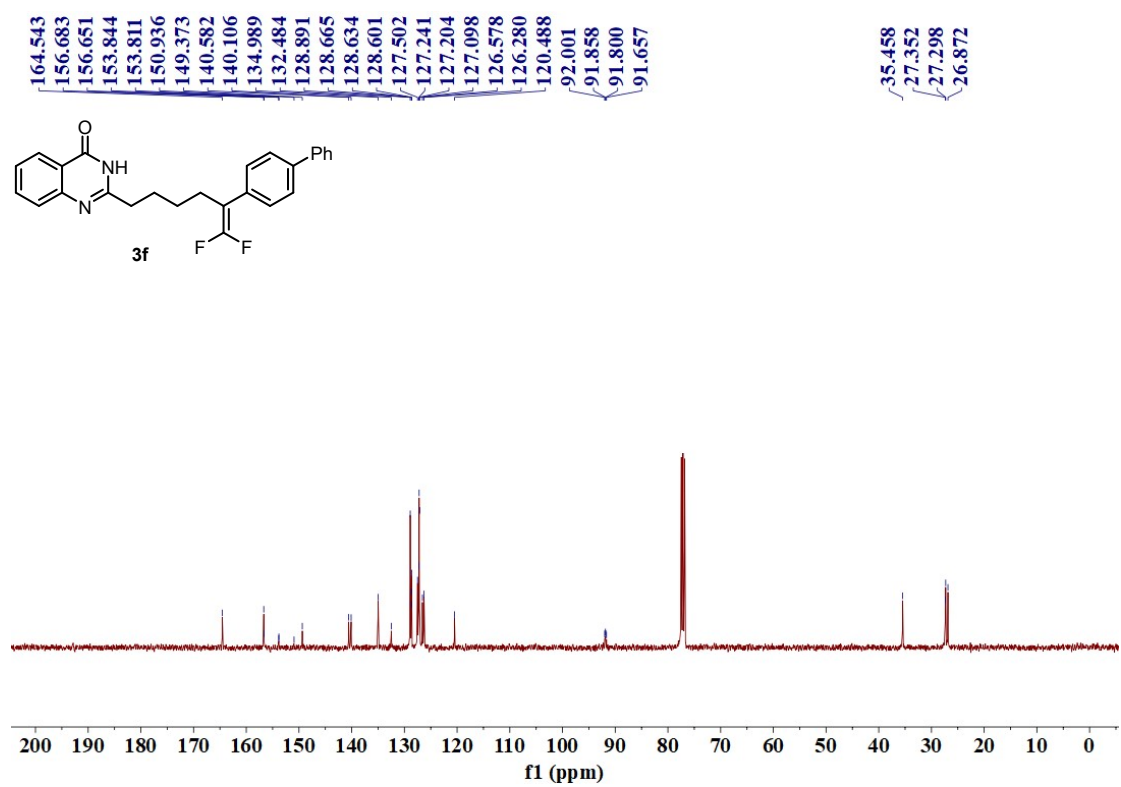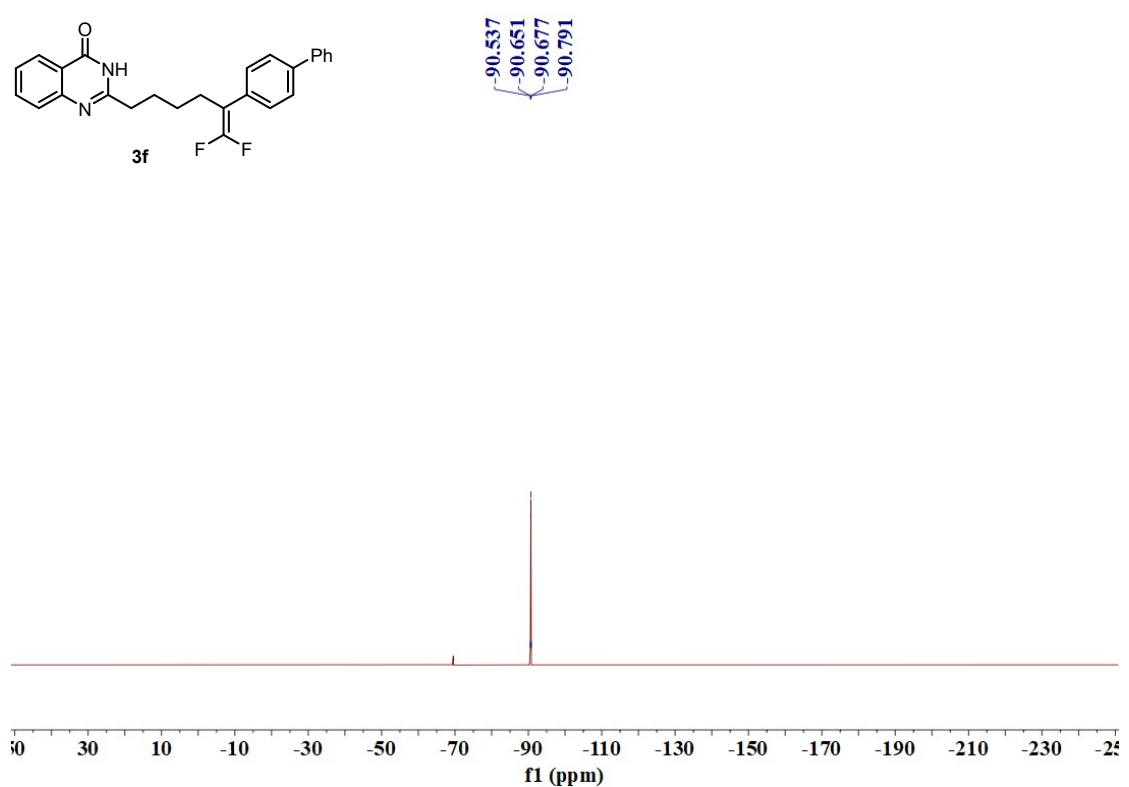

<sup>1</sup>H NMR, <sup>13</sup>C NMR and <sup>19</sup>F NMR spectra for product 3g (Chloroform-d)

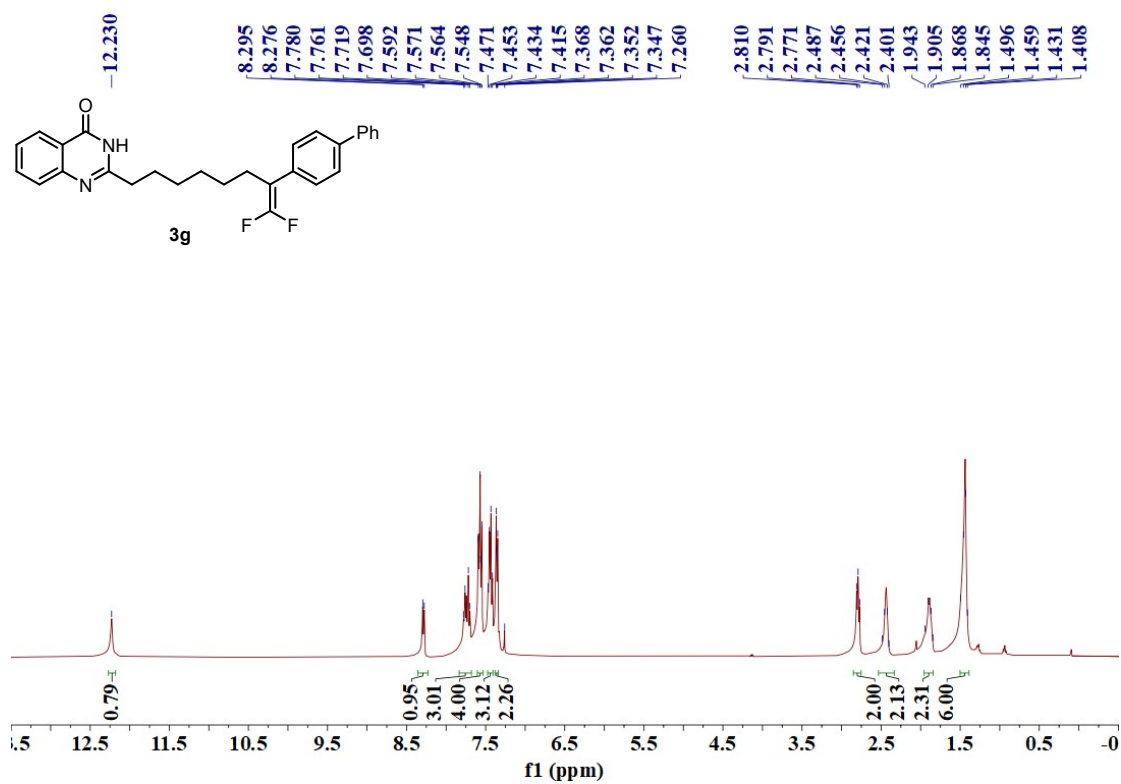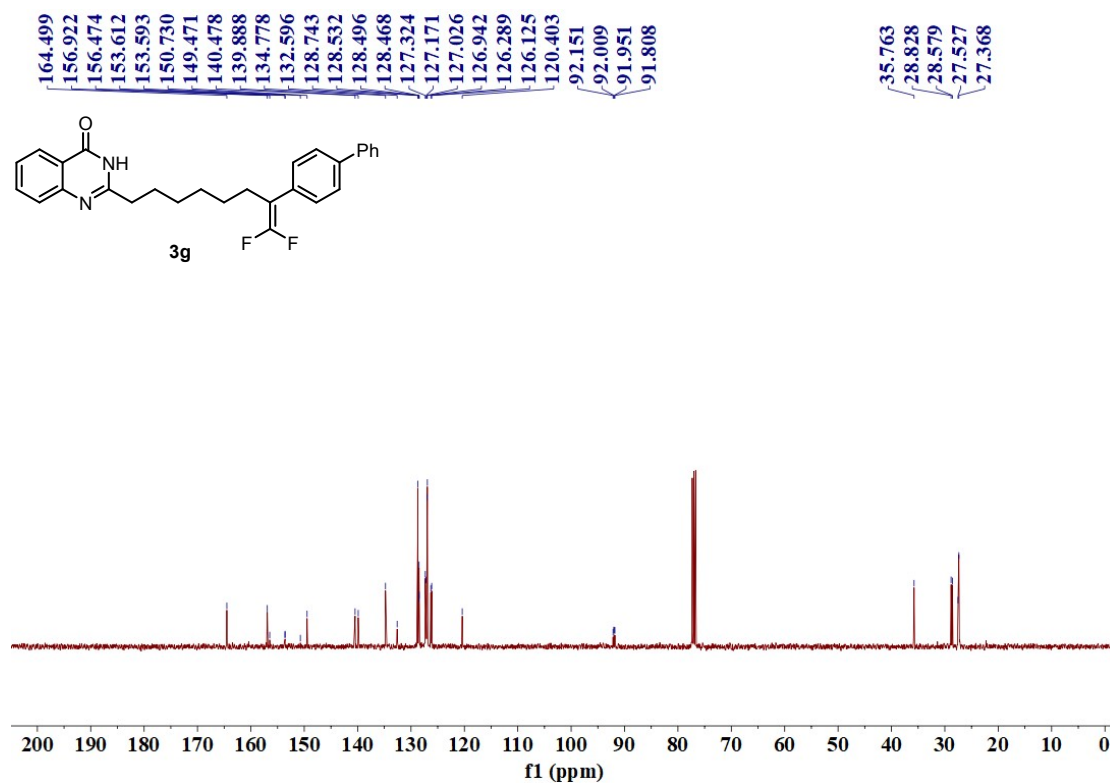

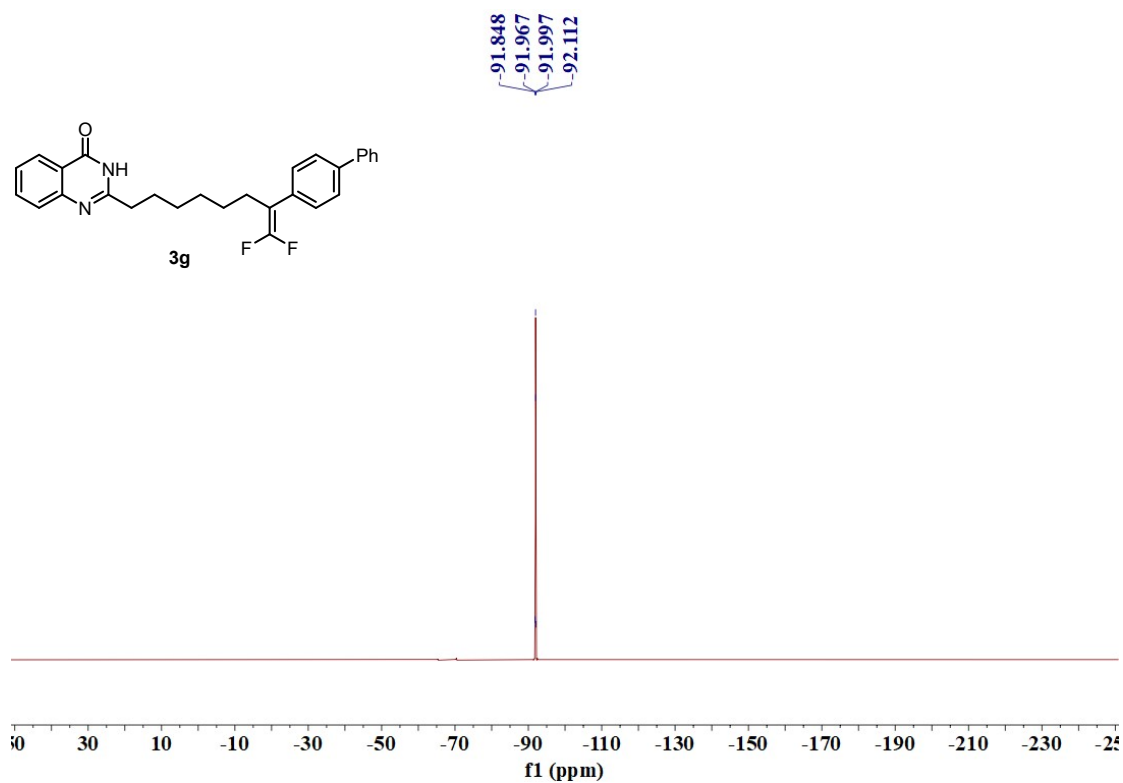

$^1\text{H}$  NMR,  $^{13}\text{C}$  NMR and  $^{19}\text{F}$  NMR spectra for product **3h** (Chloroform-*d*)

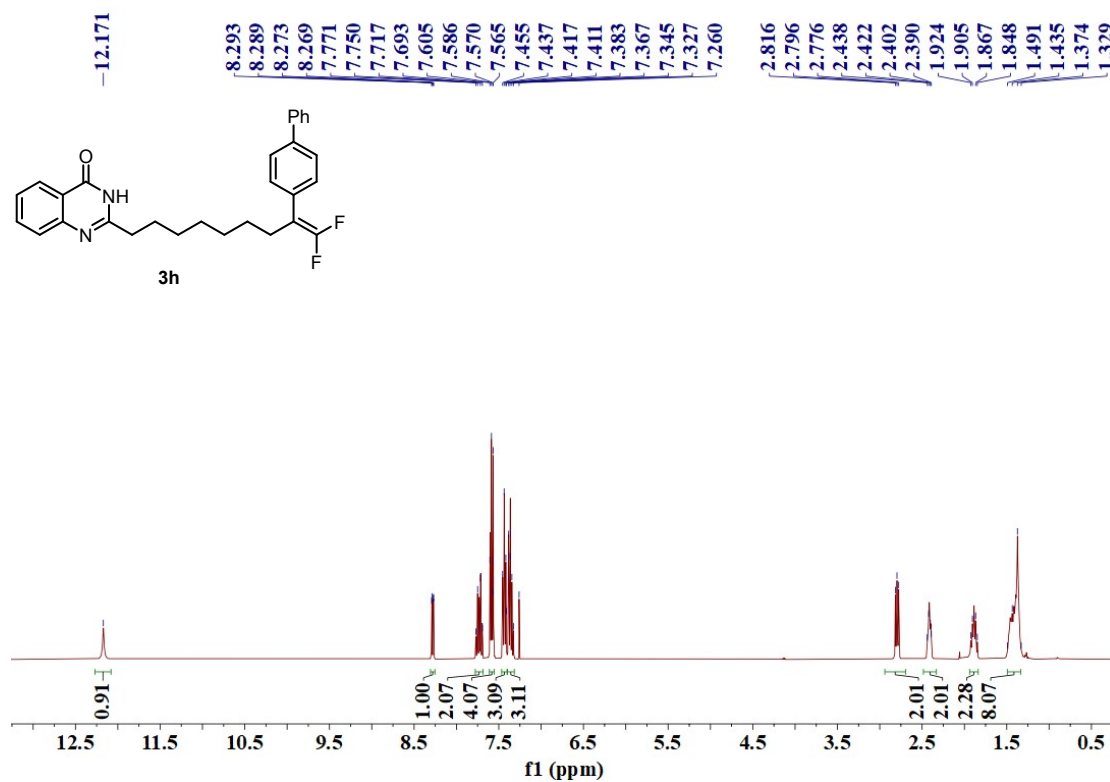

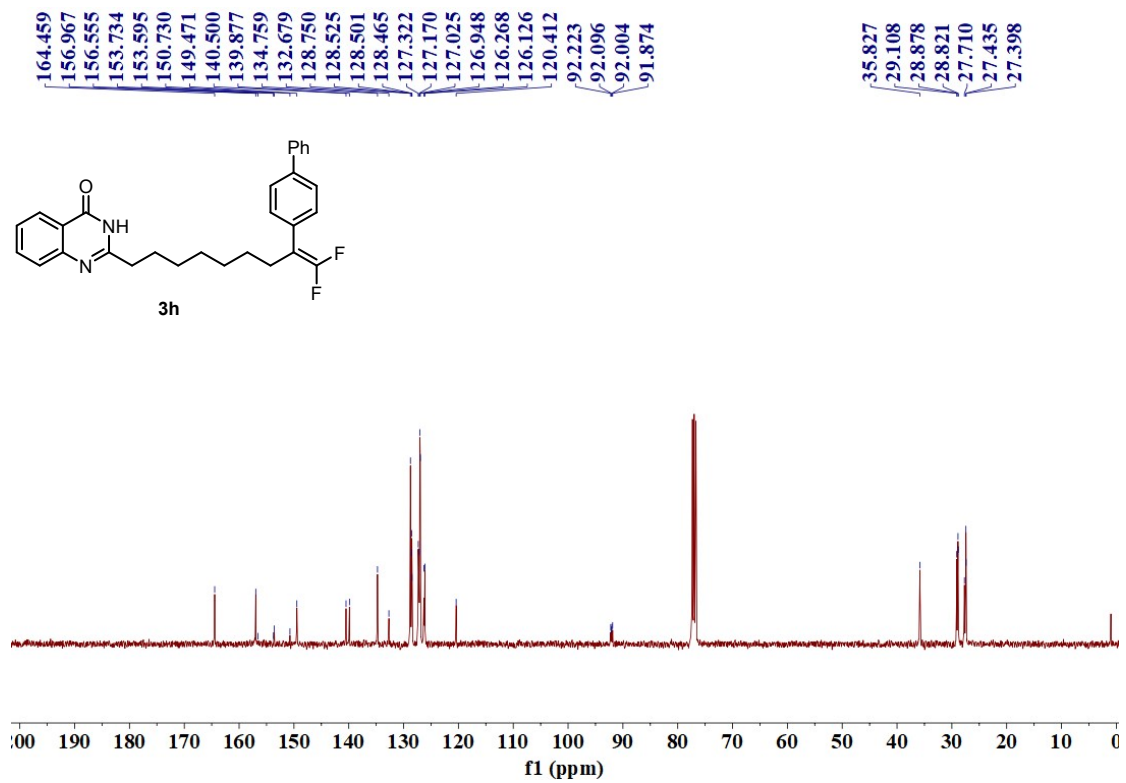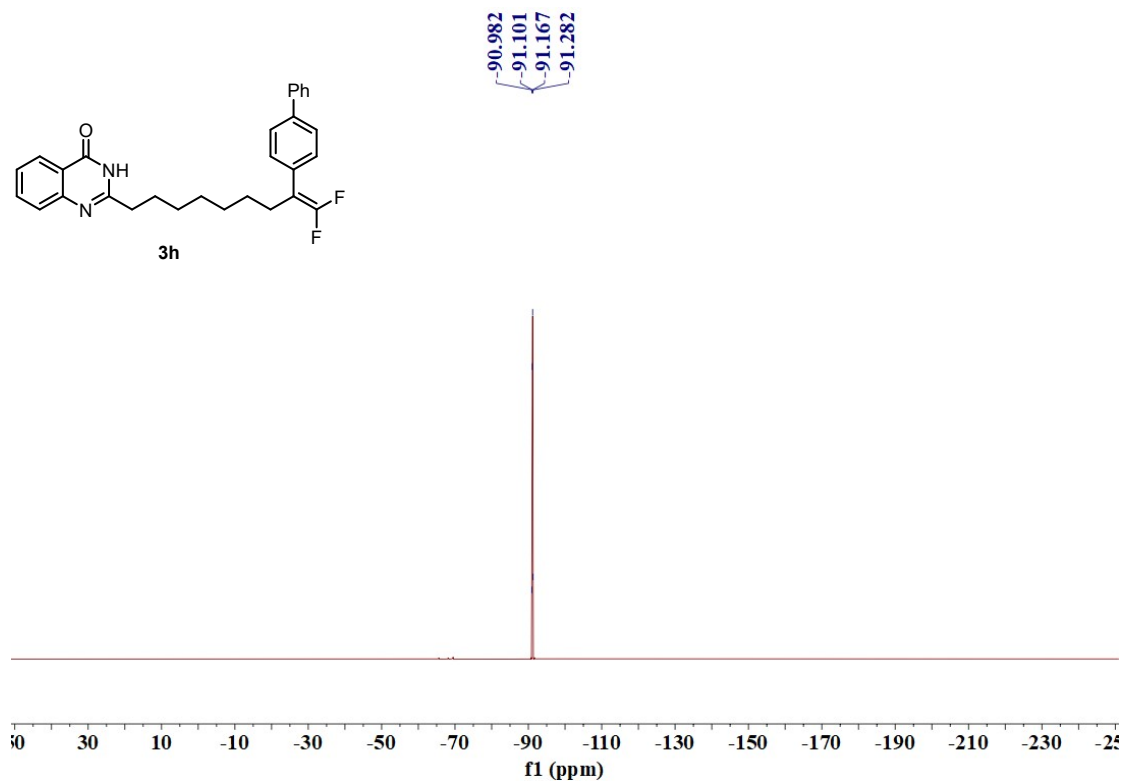

<sup>1</sup>H NMR, <sup>13</sup>C NMR and <sup>19</sup>F NMR spectra for product 3i (Chloroform-*d*)

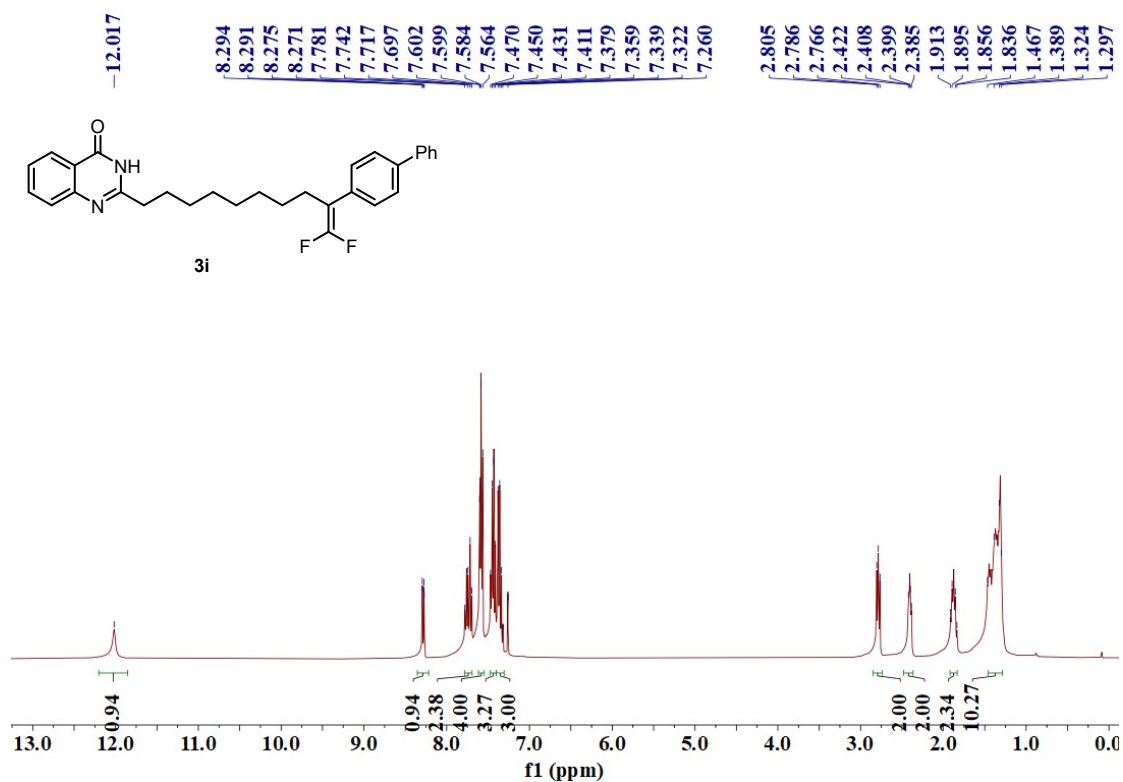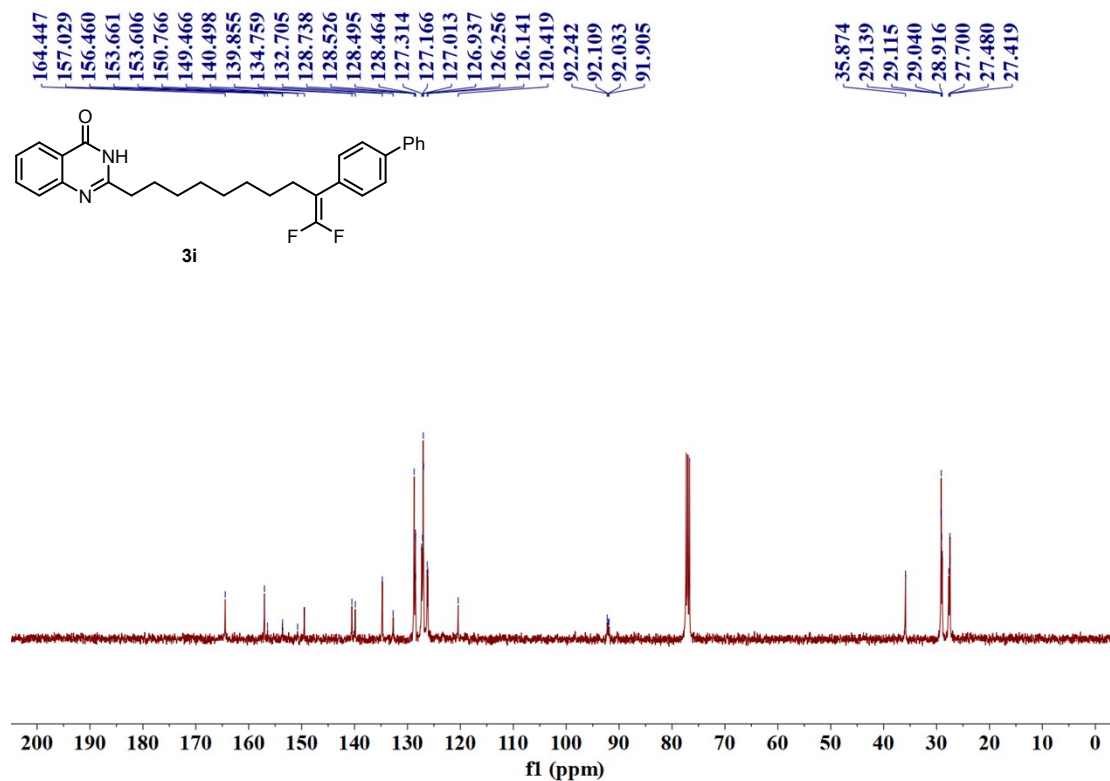

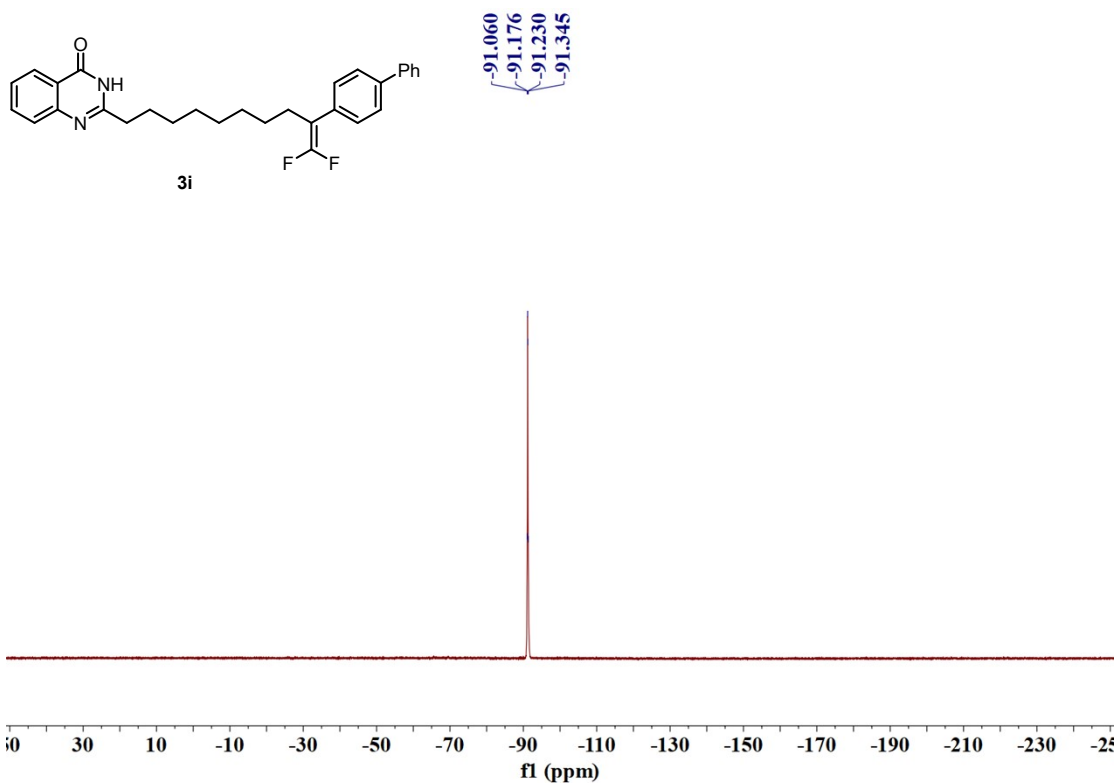

**$^1\text{H}$  NMR,  $^{13}\text{C}$  NMR and  $^{19}\text{F}$  NMR spectra for product **3j** (Chloroform-*d*)**

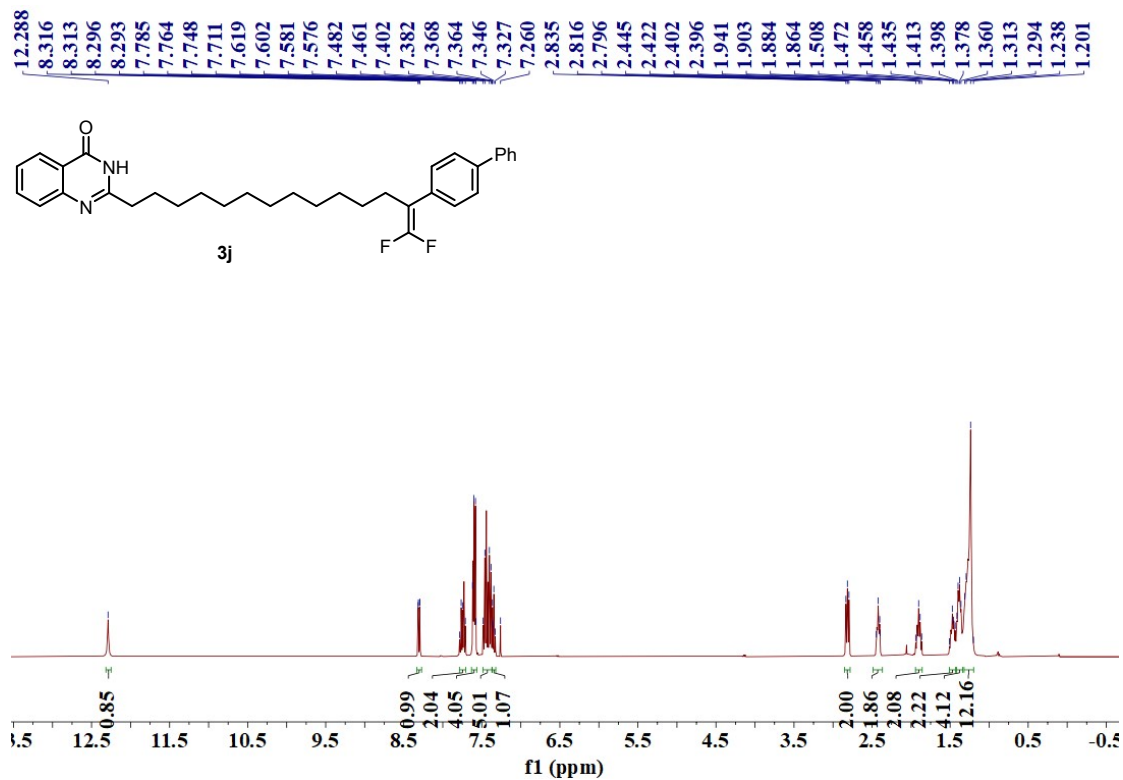

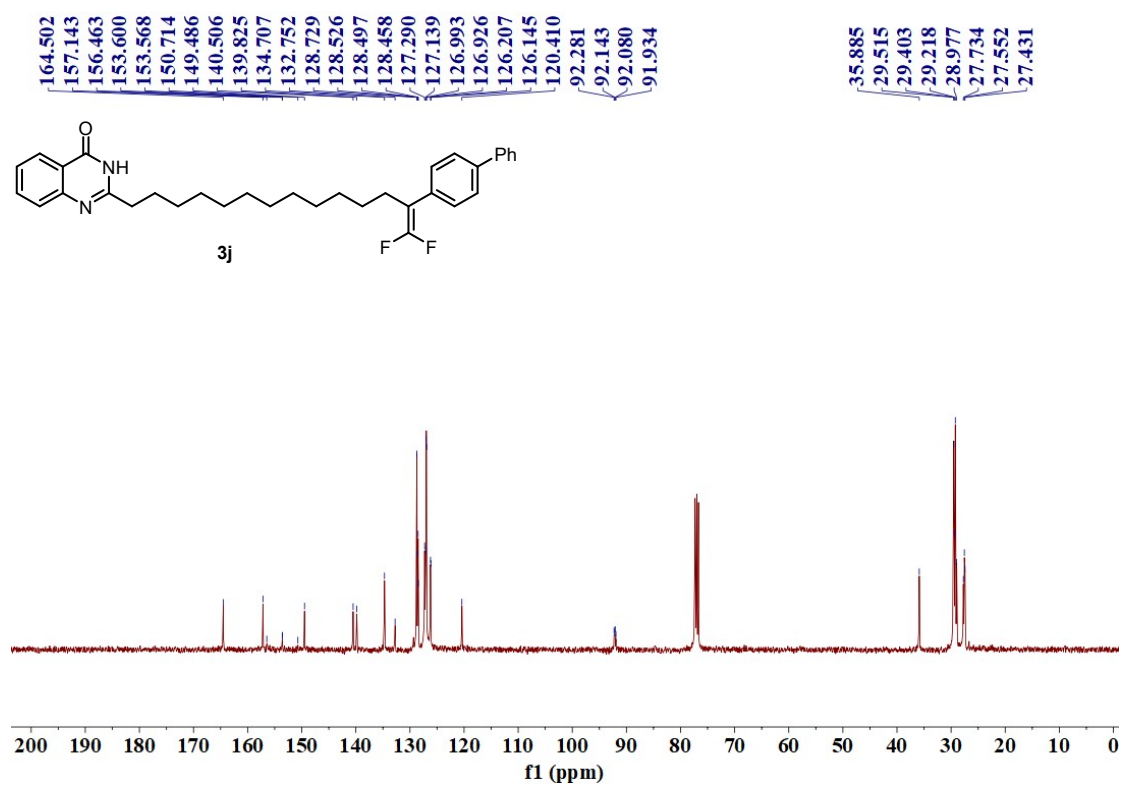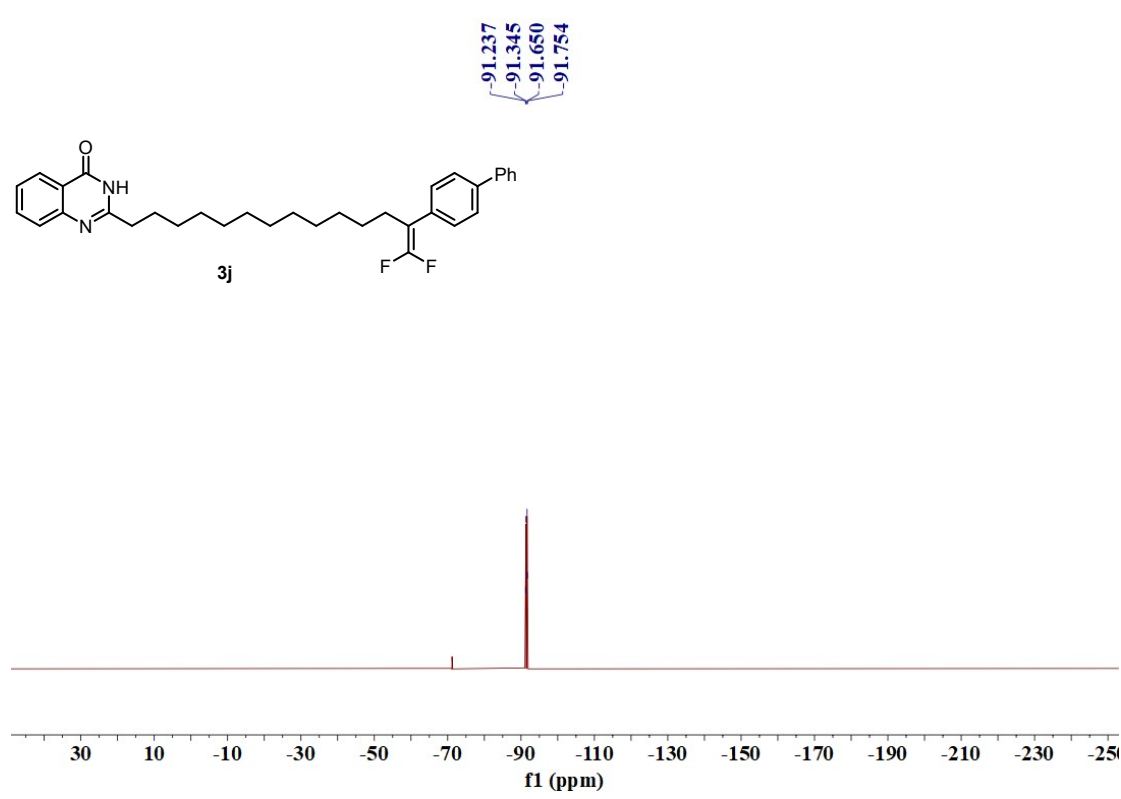



<sup>1</sup>H NMR, <sup>13</sup>C NMR and <sup>19</sup>F NMR spectra for product 3k (Chloroform-*d*)

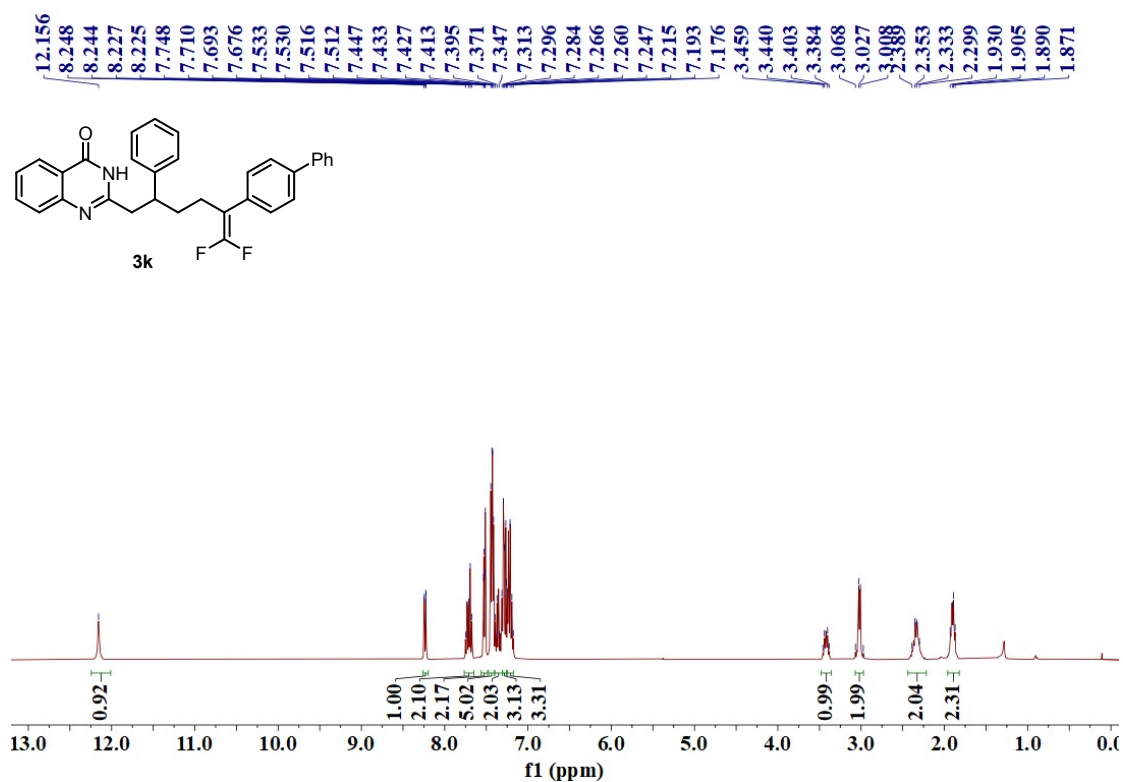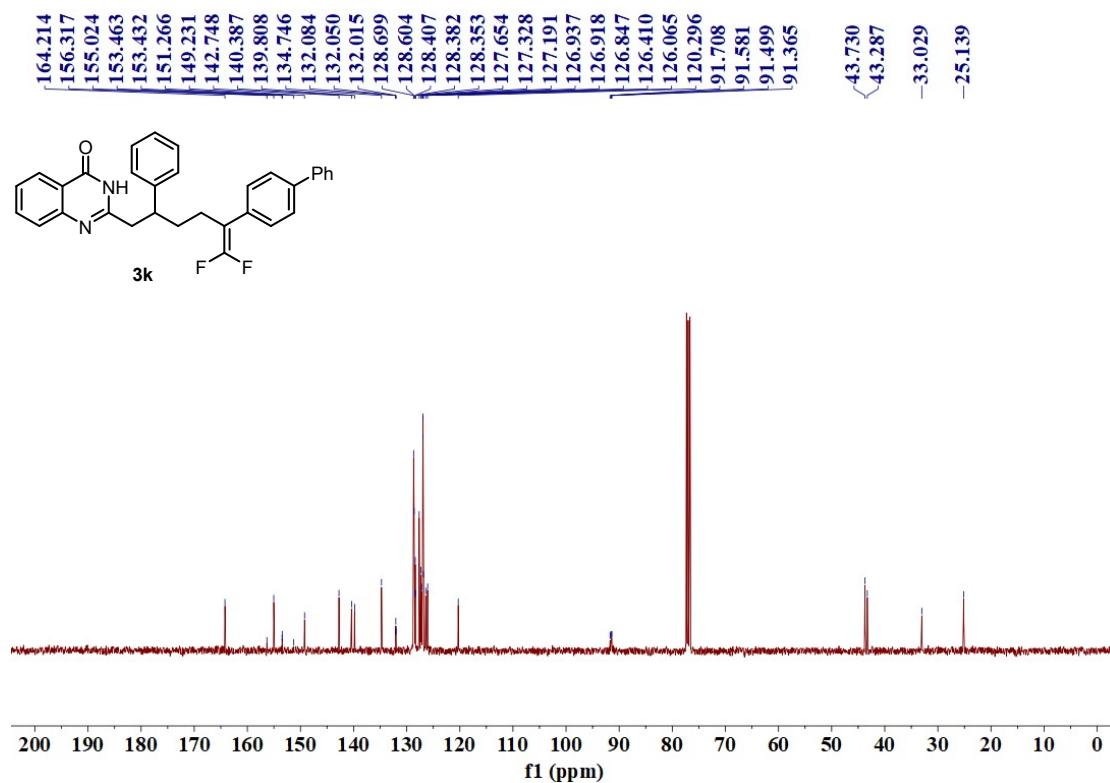

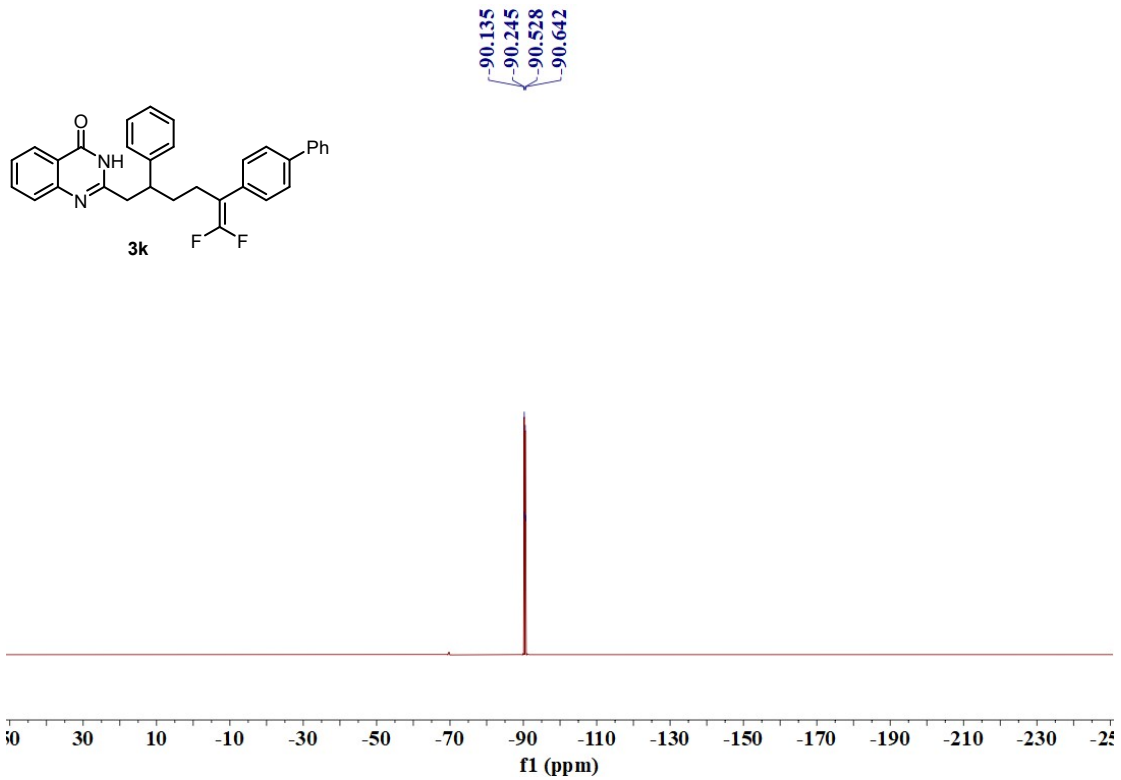

$^1\text{H}$  NMR,  $^{13}\text{C}$  NMR and  $^{19}\text{F}$  NMR spectra for product 3l (Chloroform-*d*)

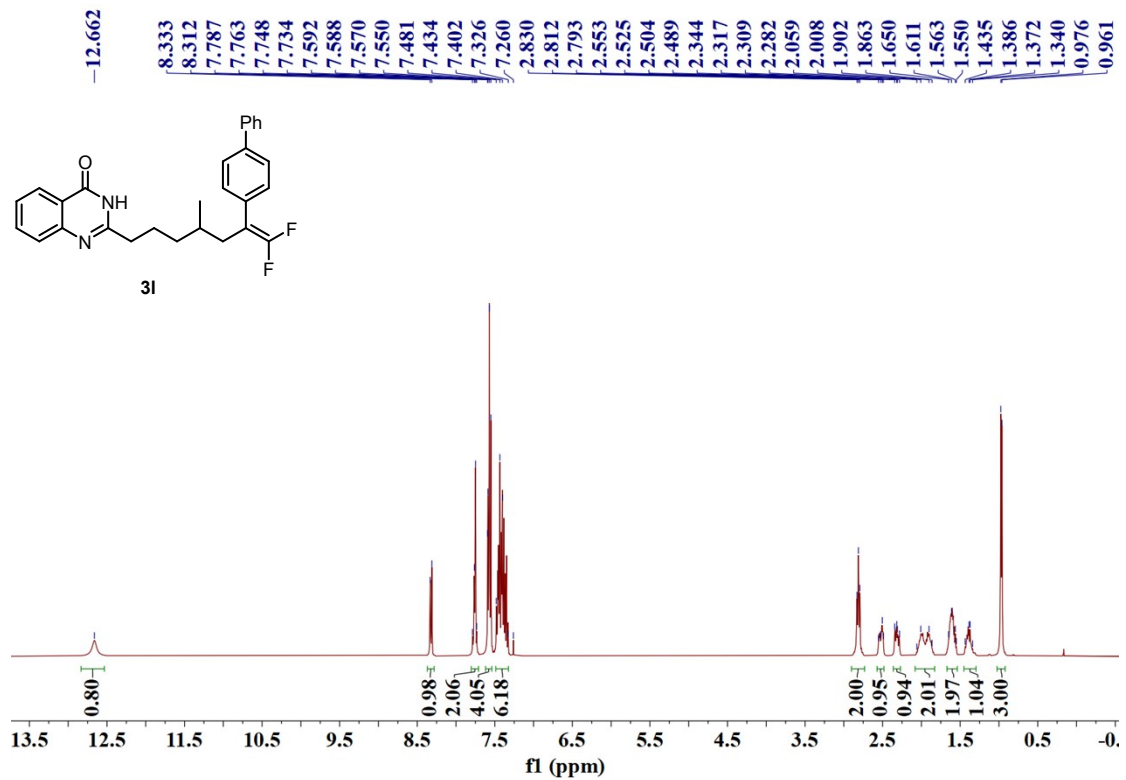

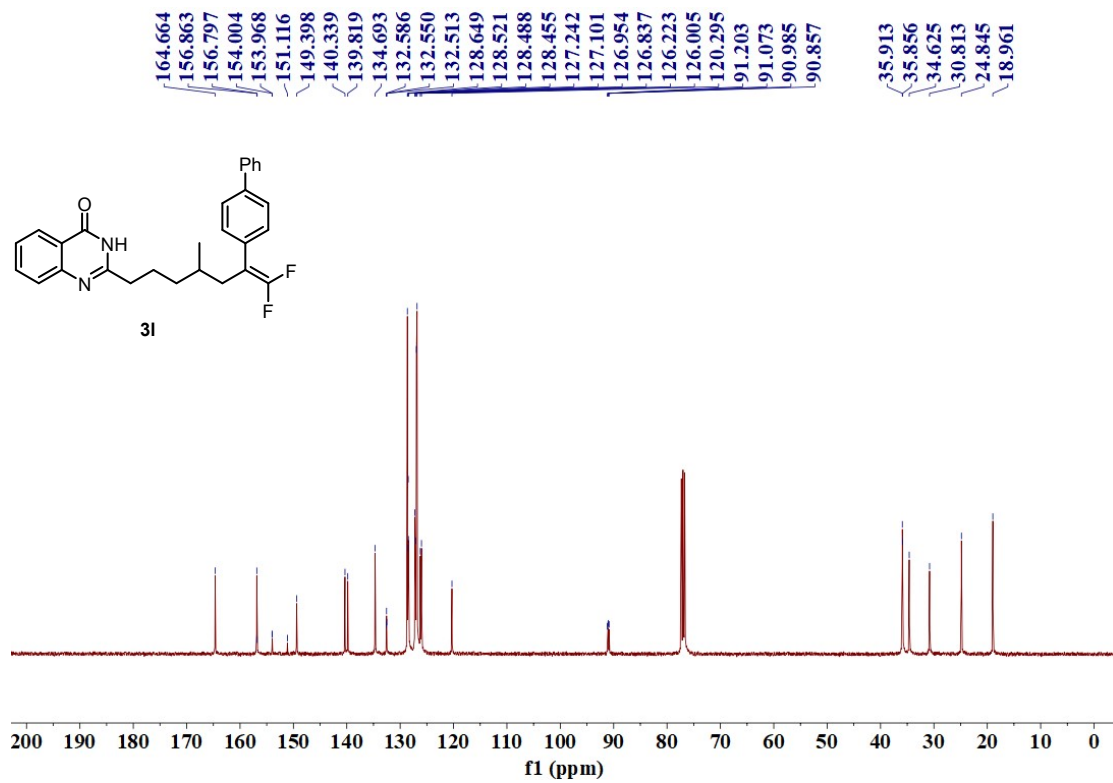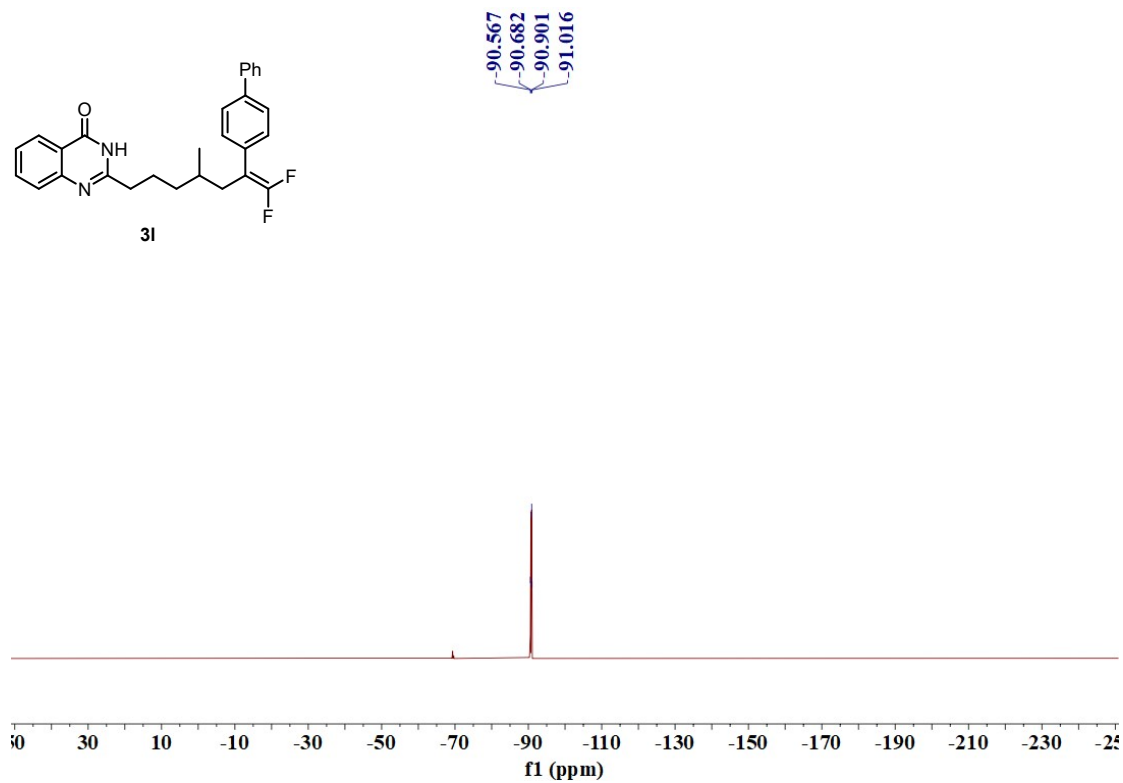

<sup>1</sup>H NMR, <sup>13</sup>C NMR and <sup>19</sup>F NMR spectra for product 3m (Chloroform-d)

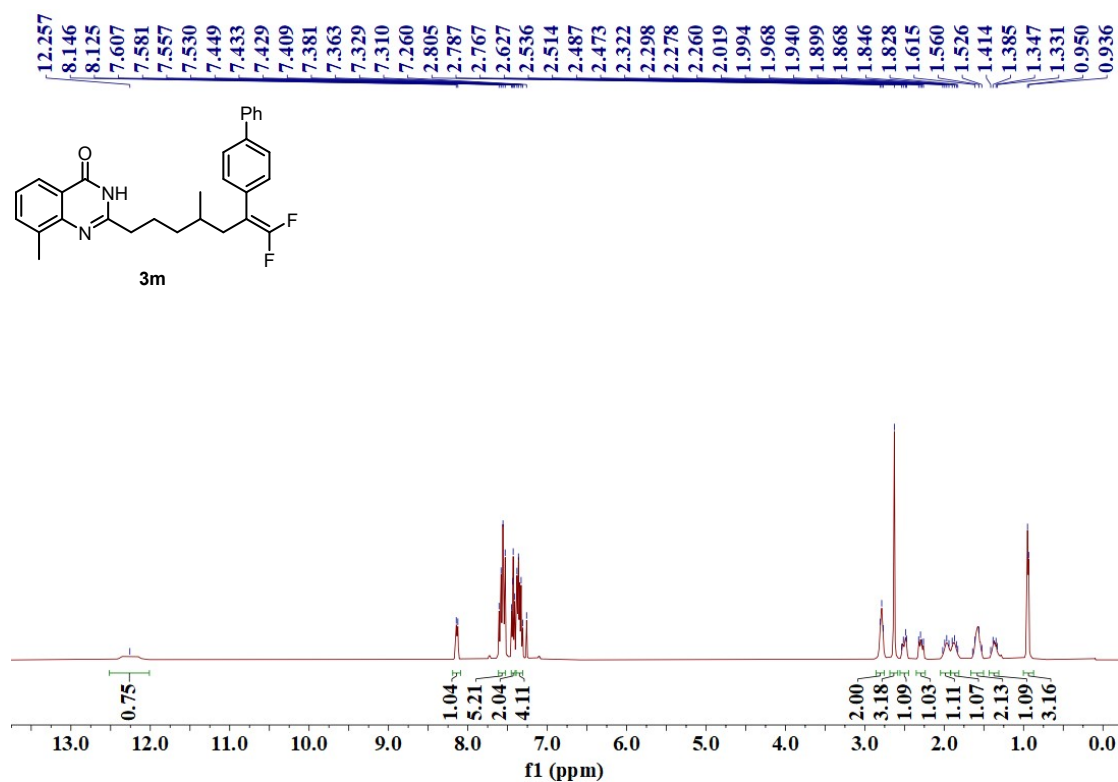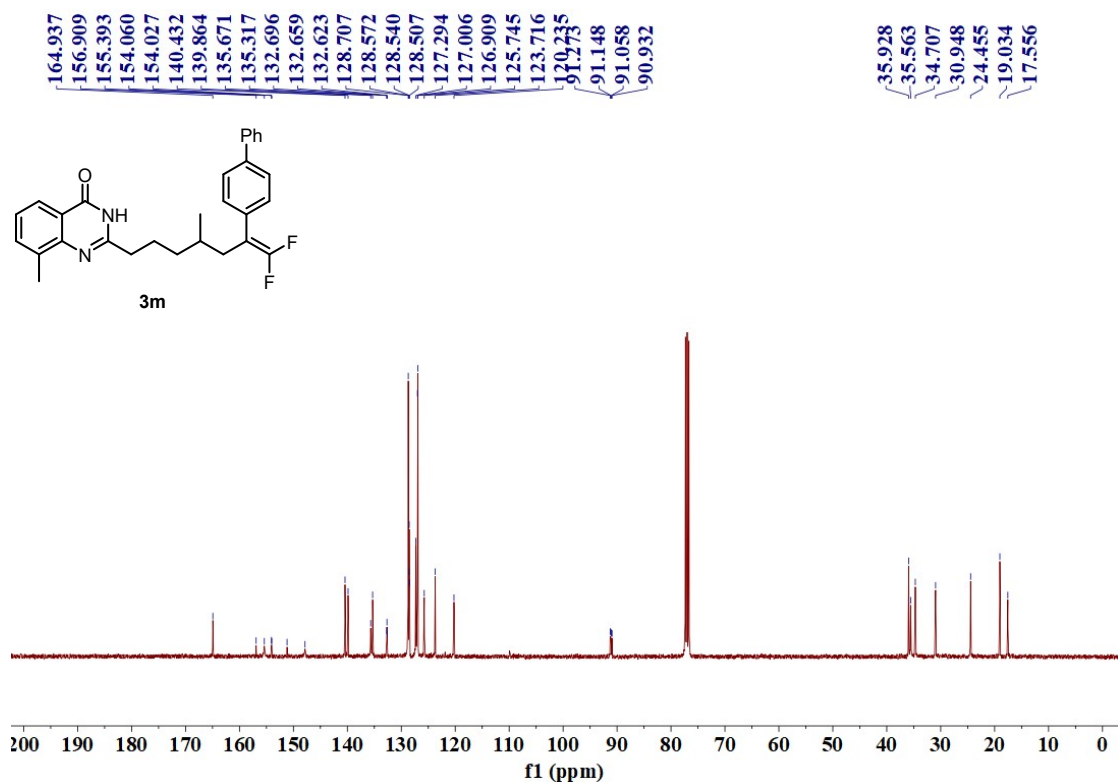

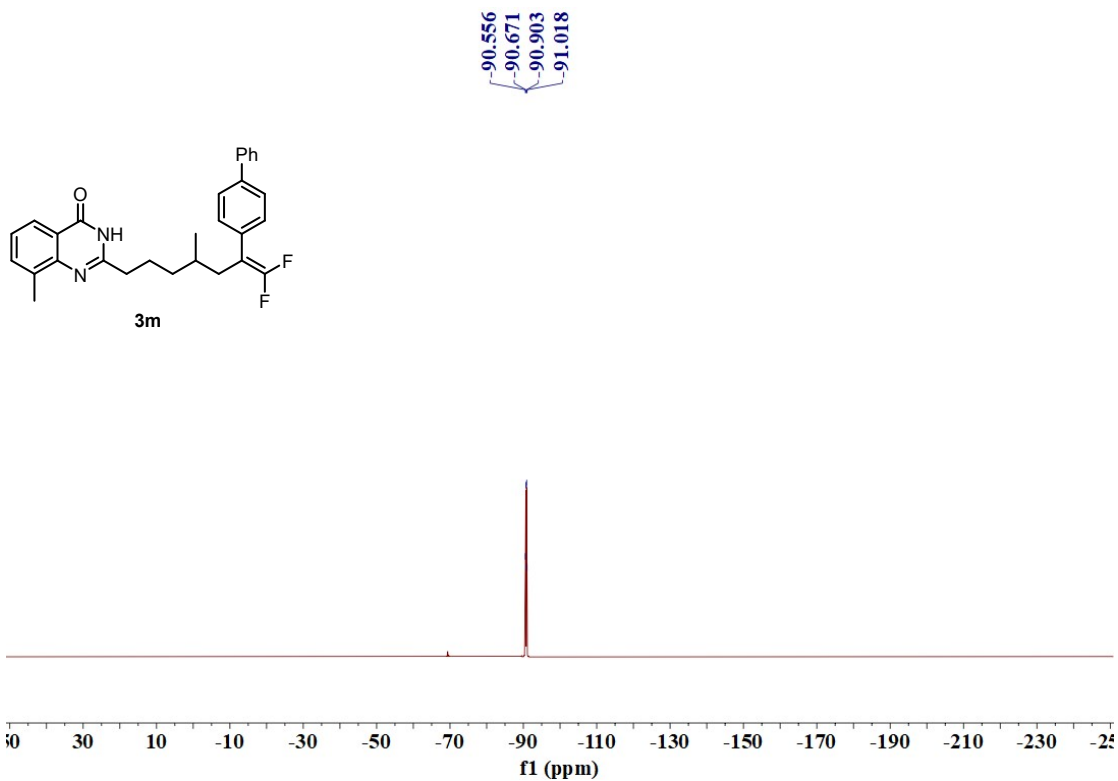

**<sup>1</sup>H NMR, <sup>13</sup>C NMR and <sup>19</sup>F NMR spectra for product 3n (Chloroform-*d*)**

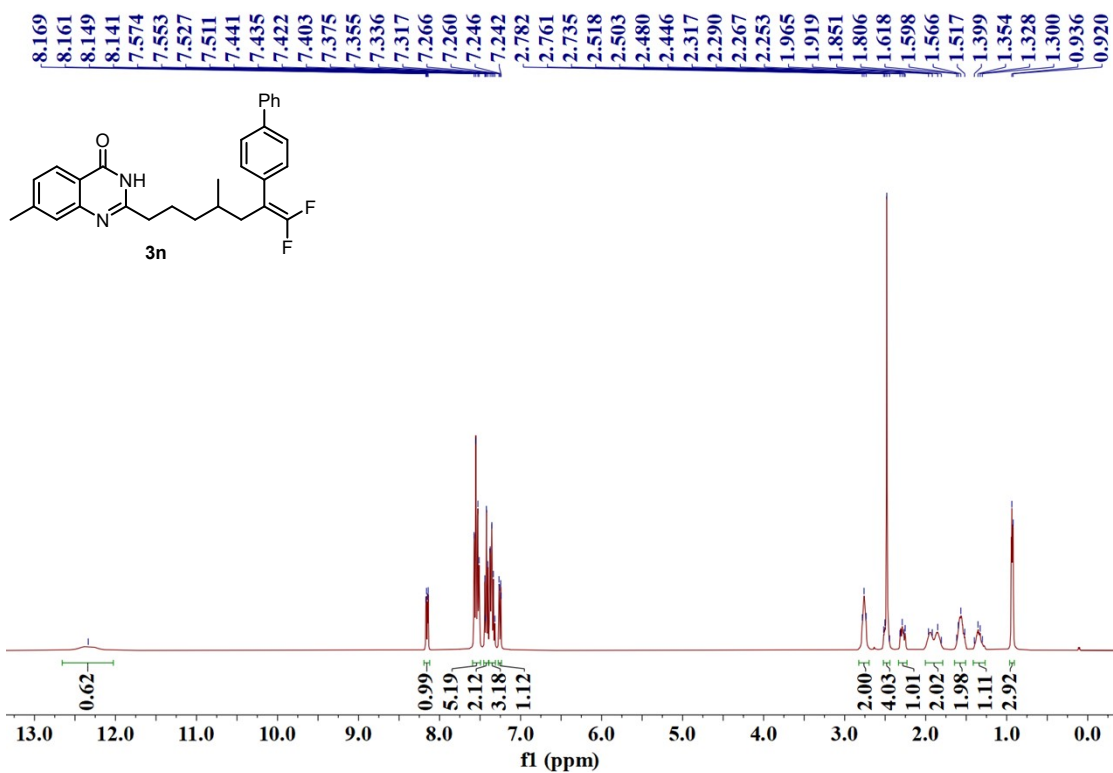

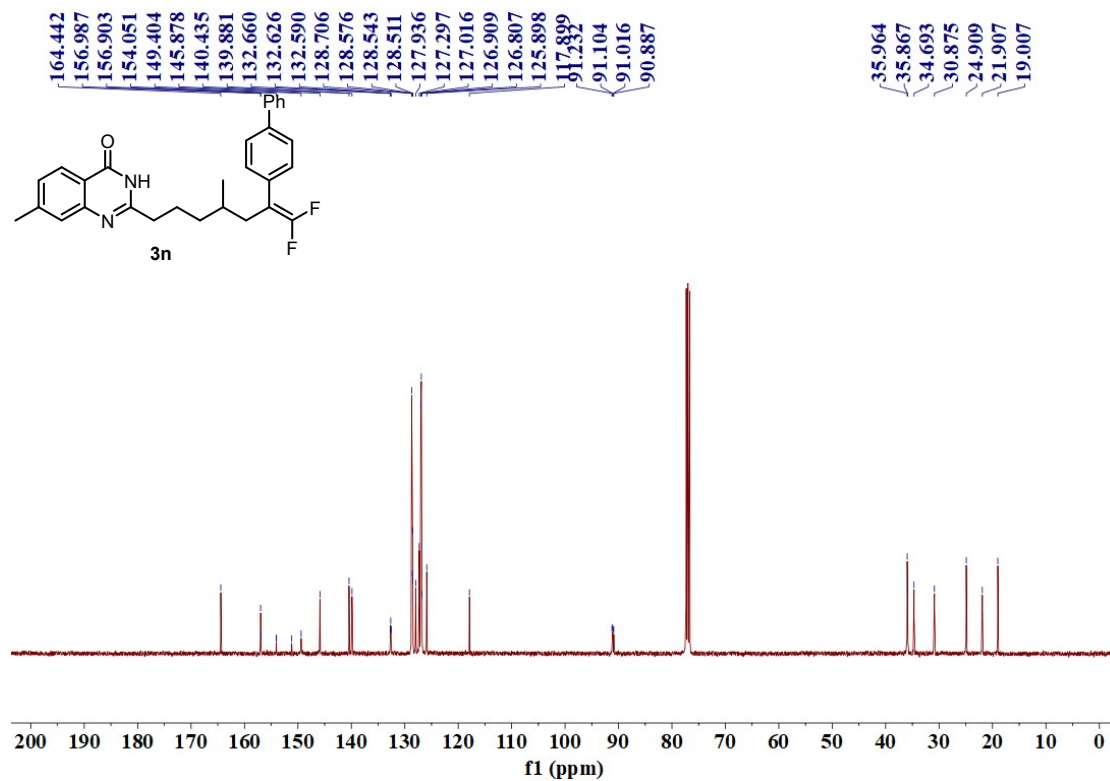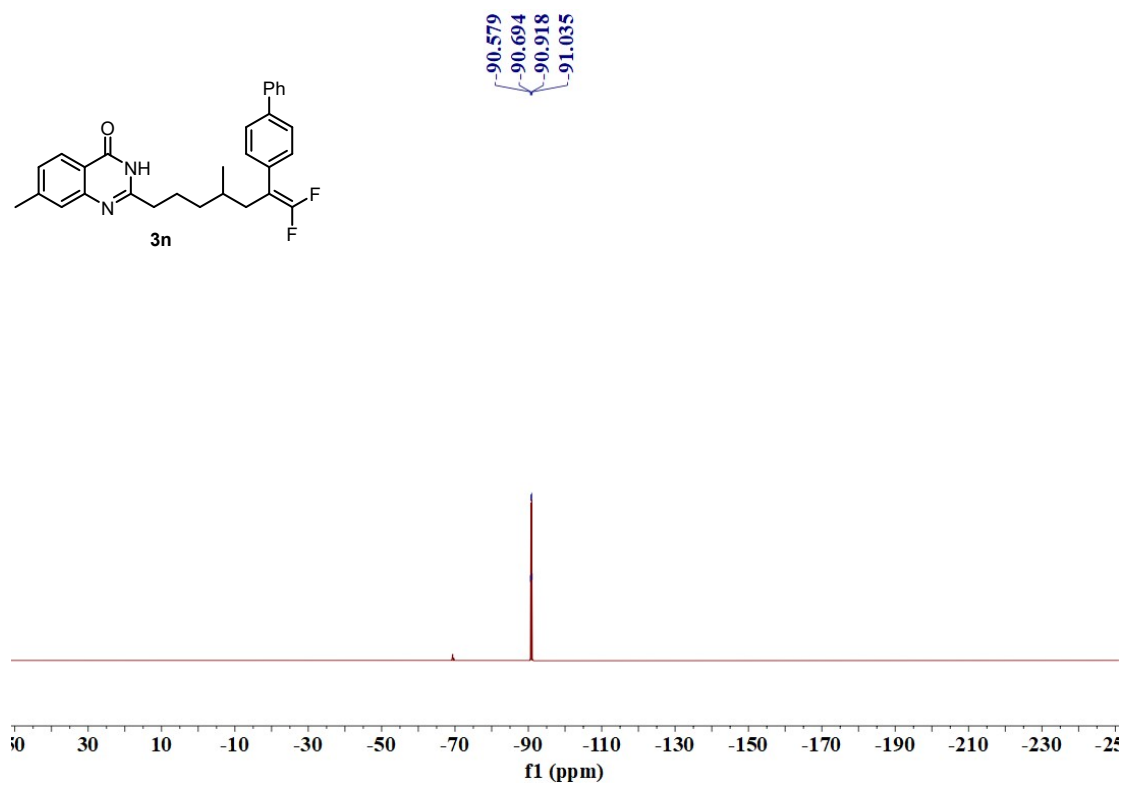

<sup>1</sup>H NMR, <sup>13</sup>C NMR and <sup>19</sup>F NMR spectra for product 3o (Chloroform-d)

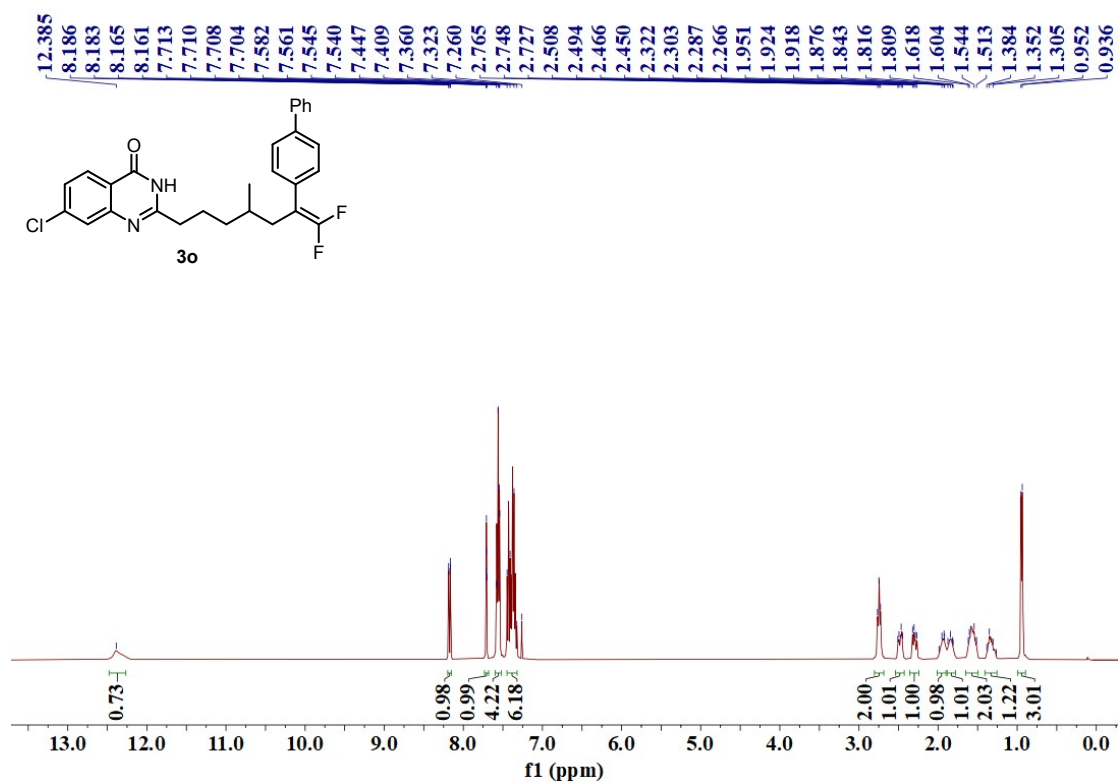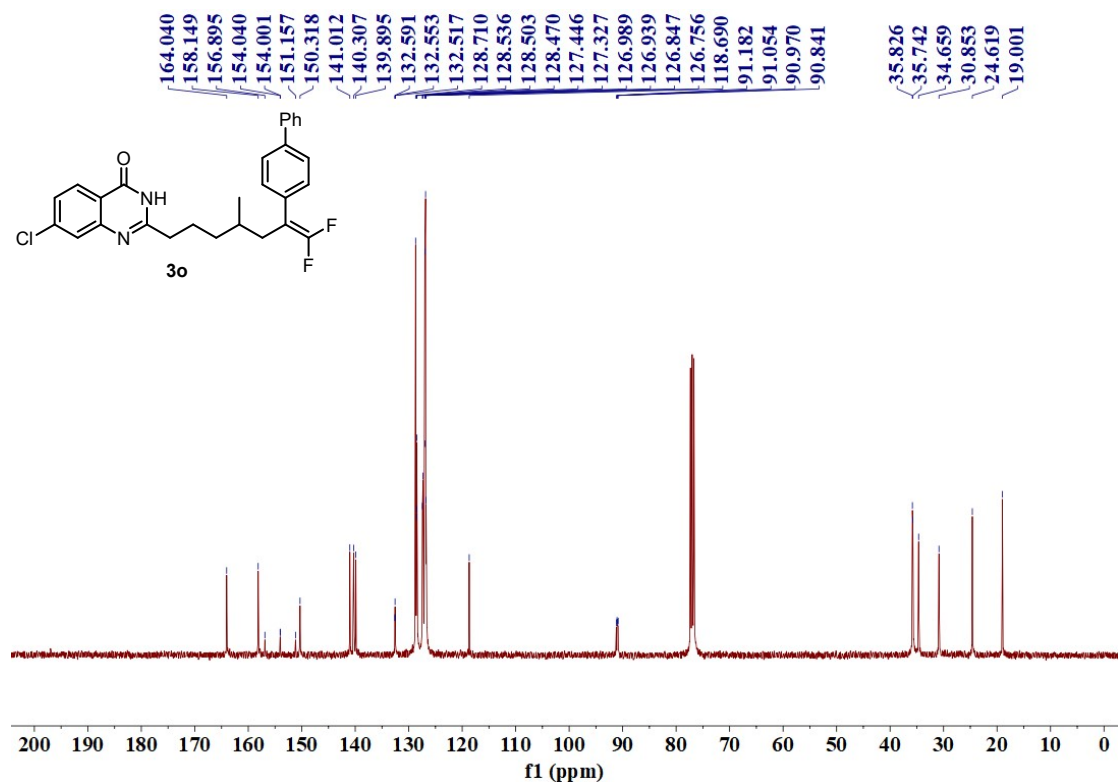

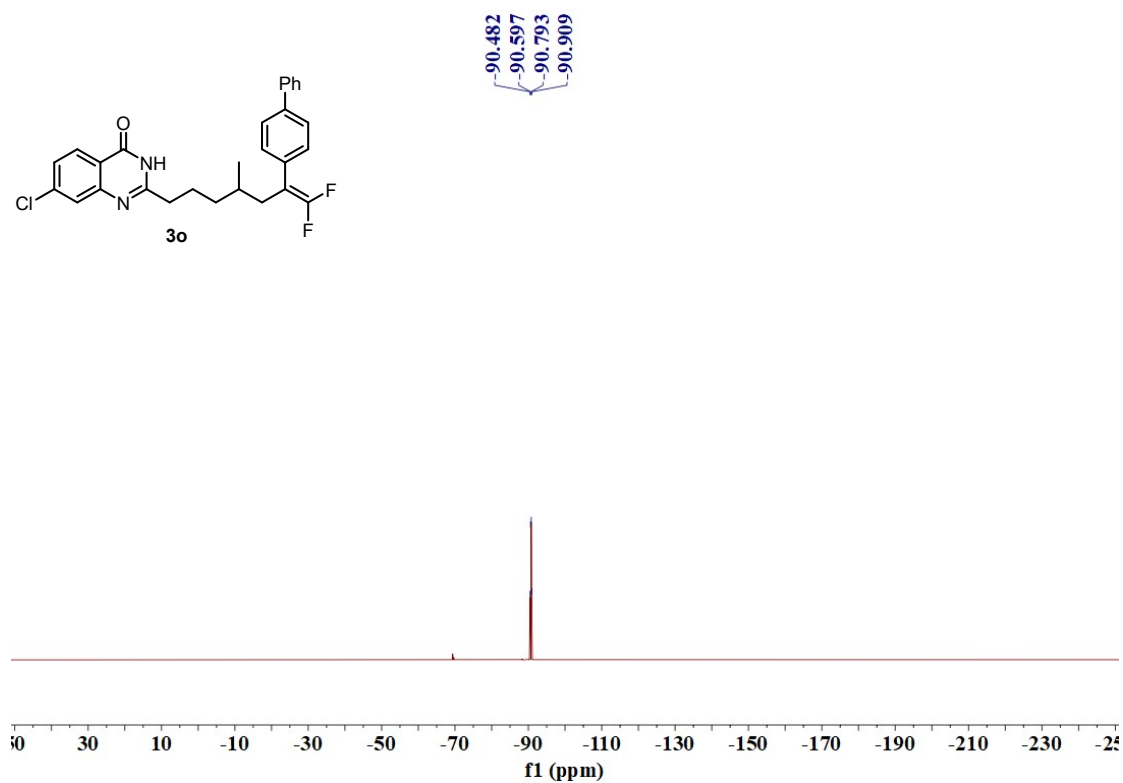

$^1\text{H}$  NMR,  $^{13}\text{C}$  NMR and  $^{19}\text{F}$  NMR spectra for product **3p** (Chloroform-*d*)

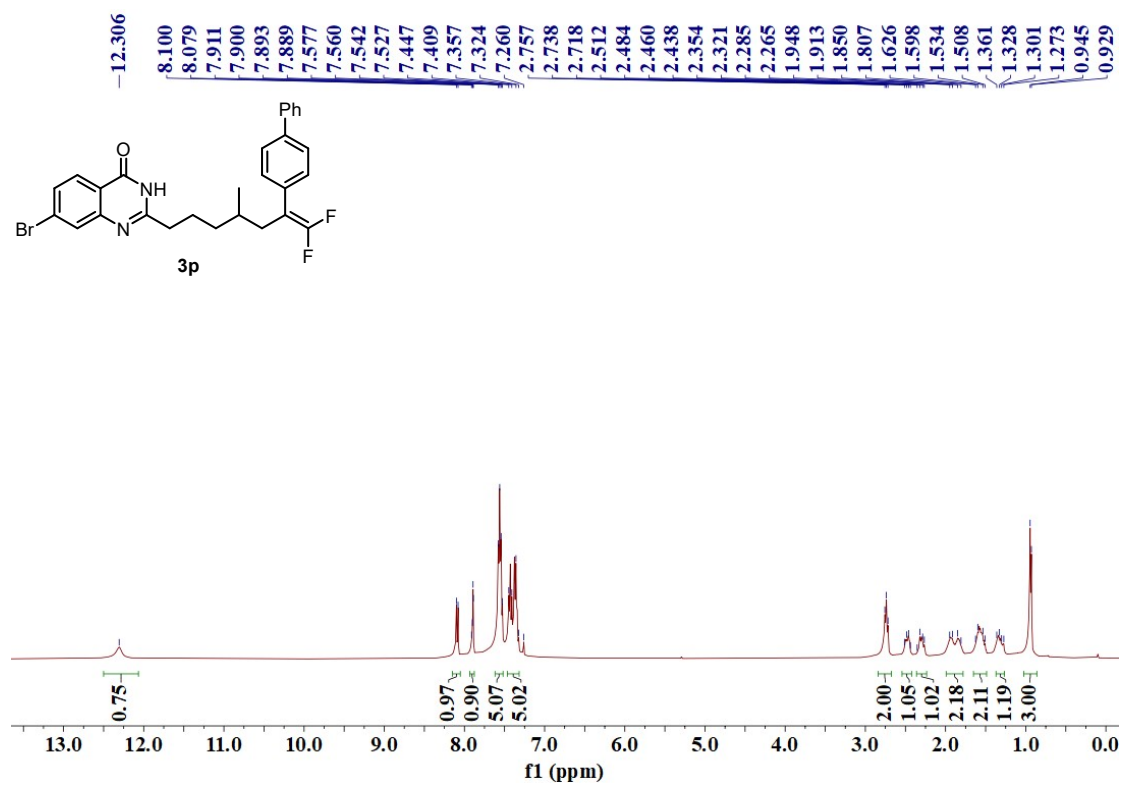



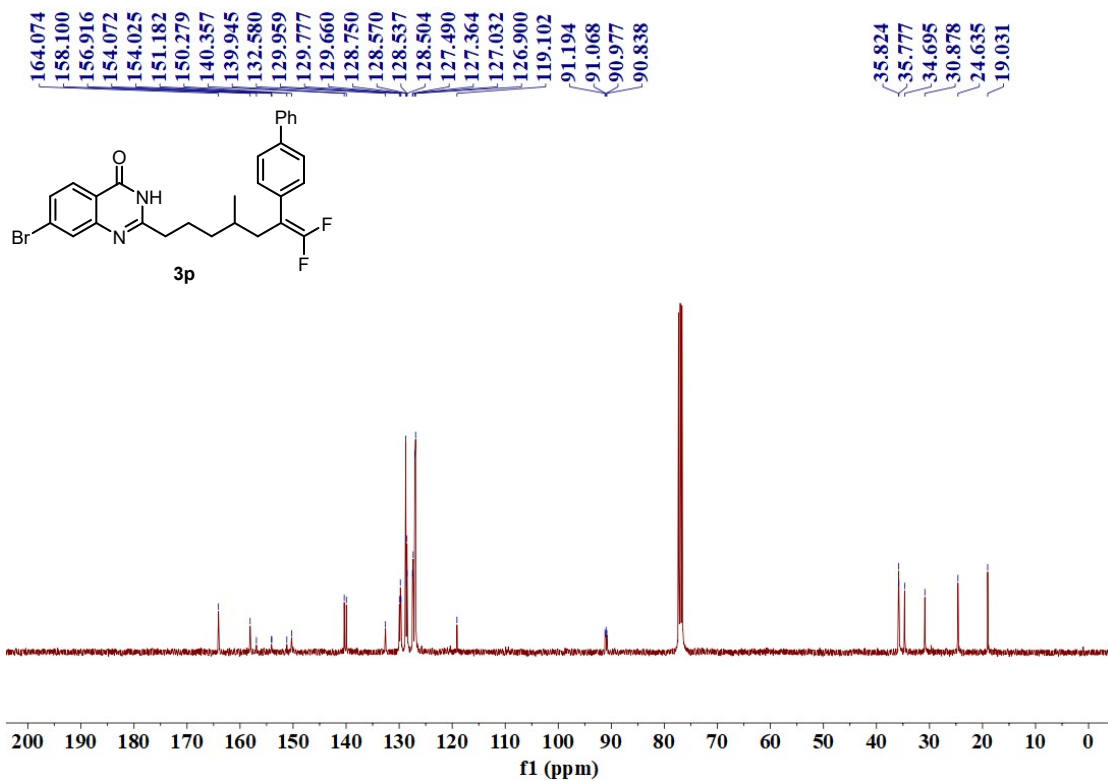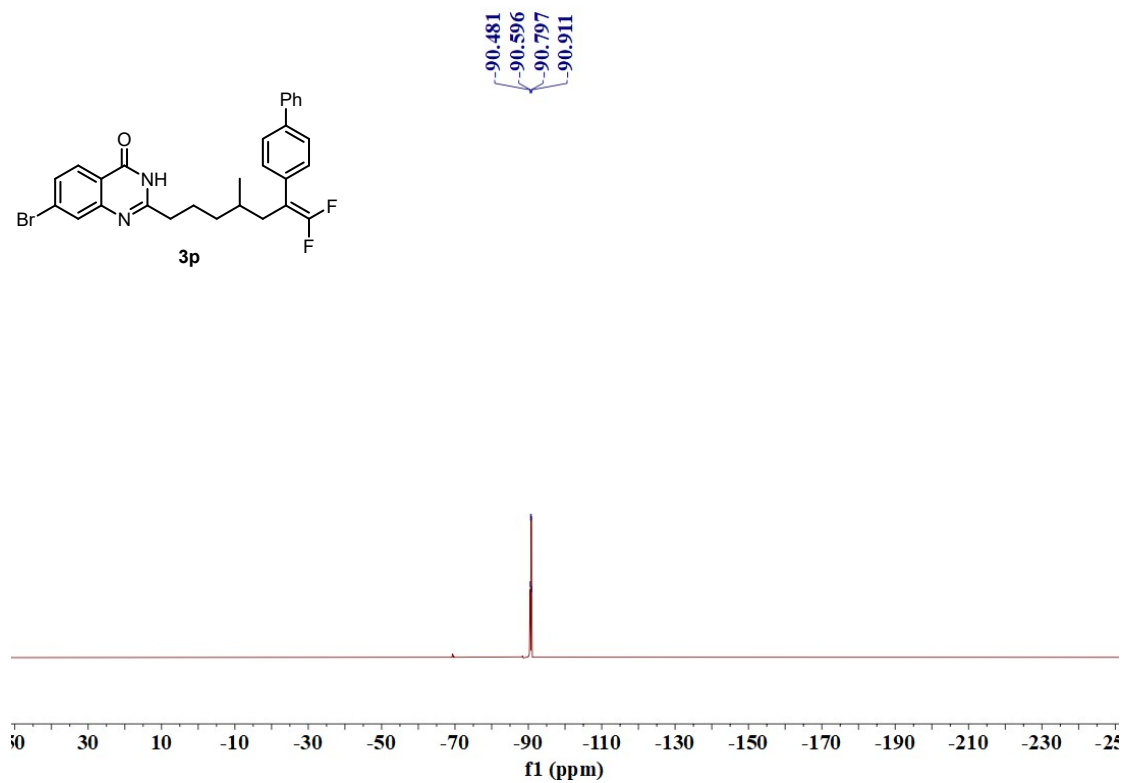

<sup>1</sup>H NMR, <sup>13</sup>C NMR and <sup>19</sup>F NMR spectra for product 3q (Chloroform-d)

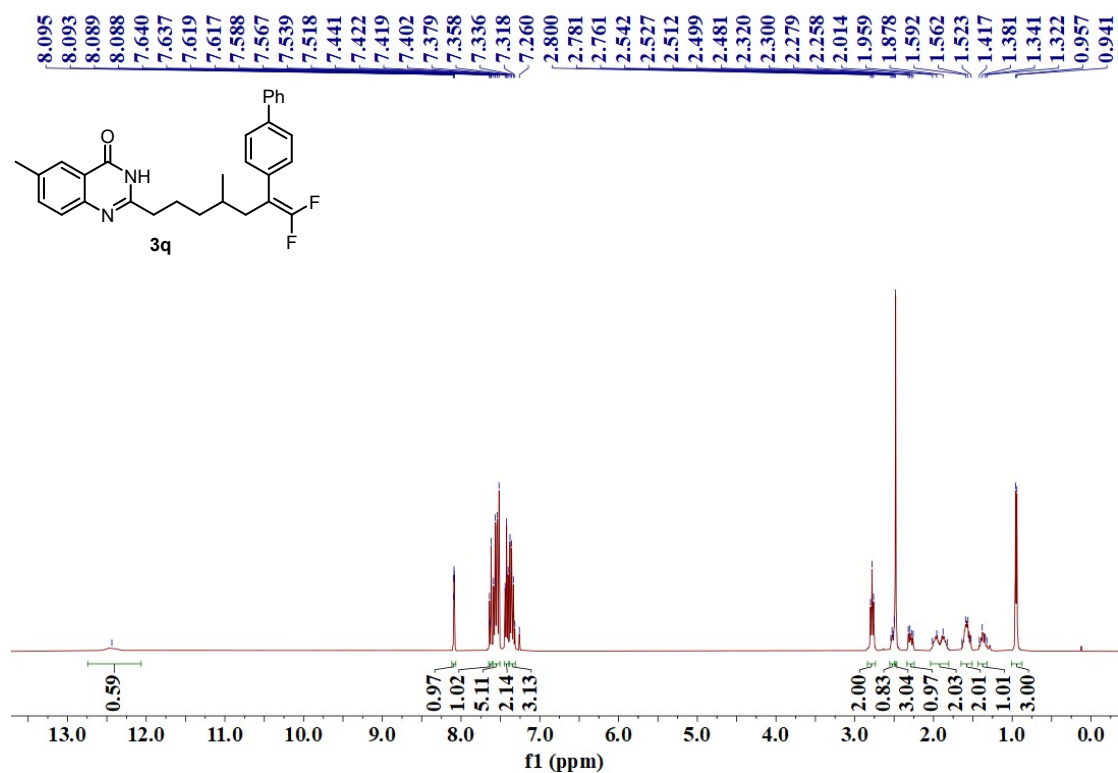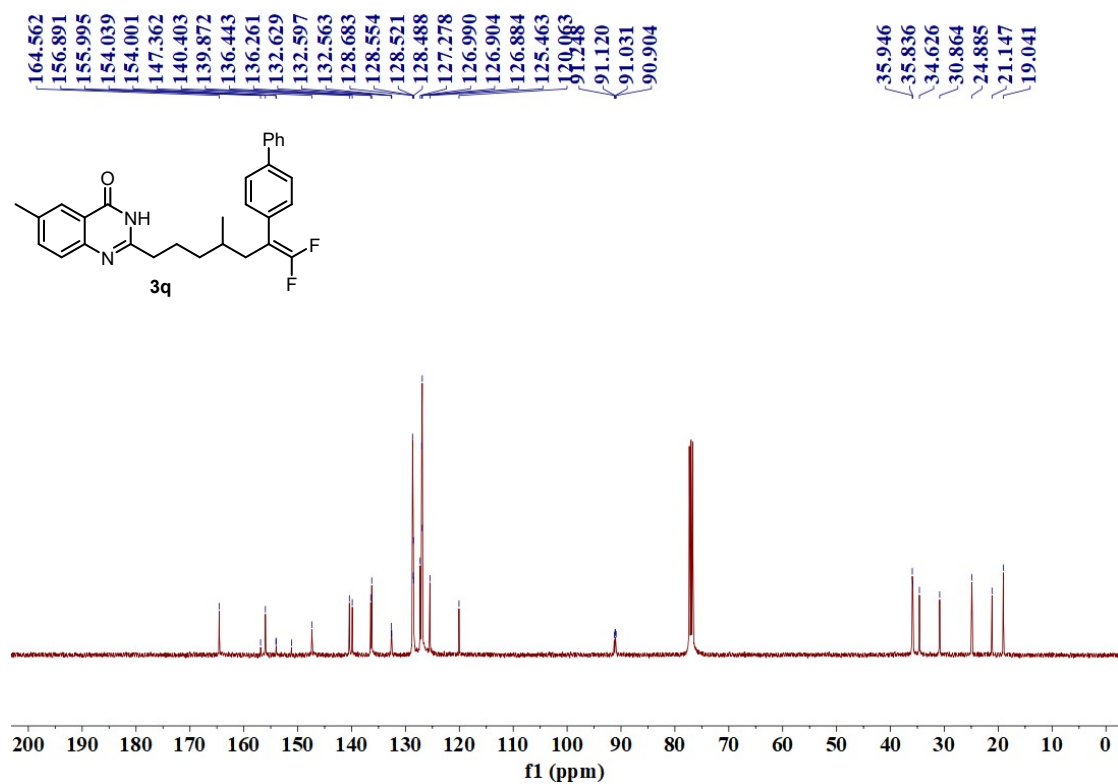

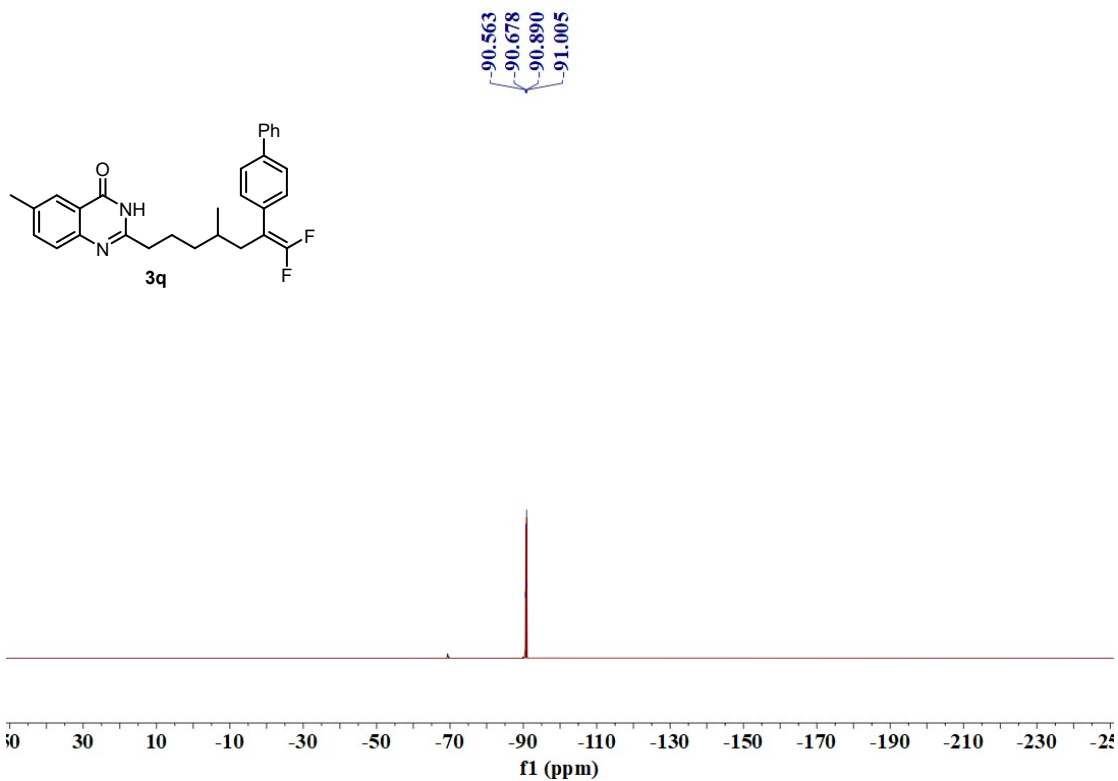

<sup>1</sup>H NMR, <sup>13</sup>C NMR and <sup>19</sup>F NMR spectra for product 3r (Chloroform-*d*)

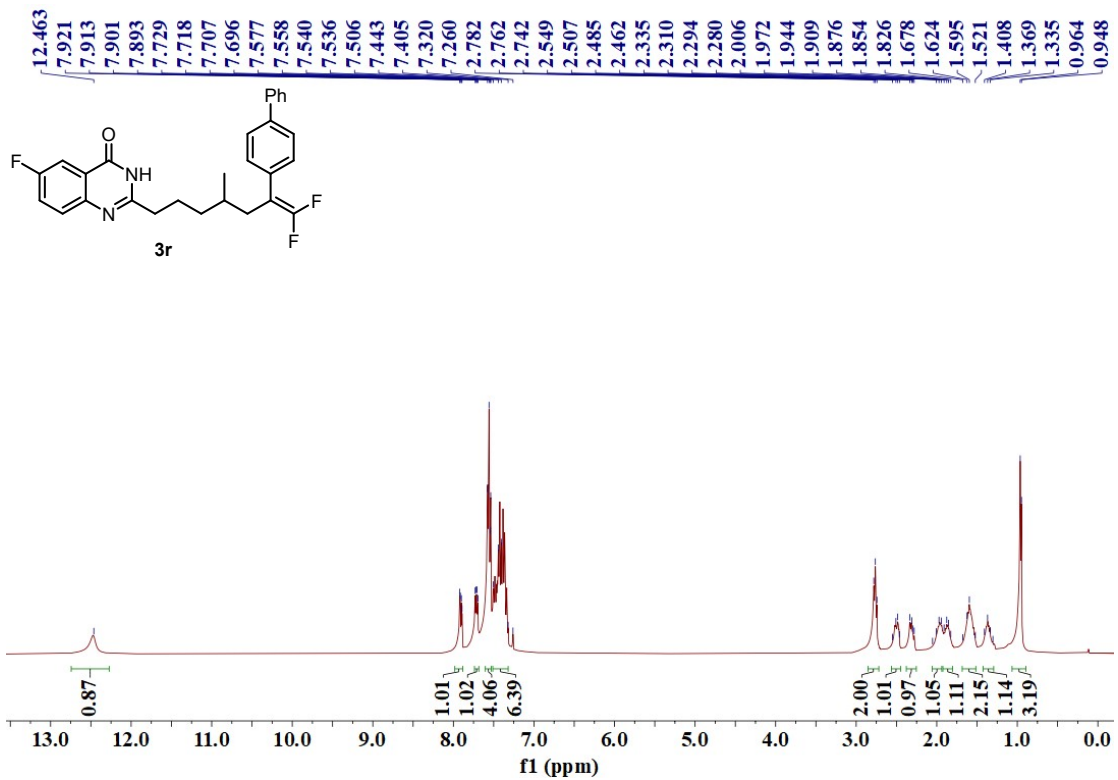

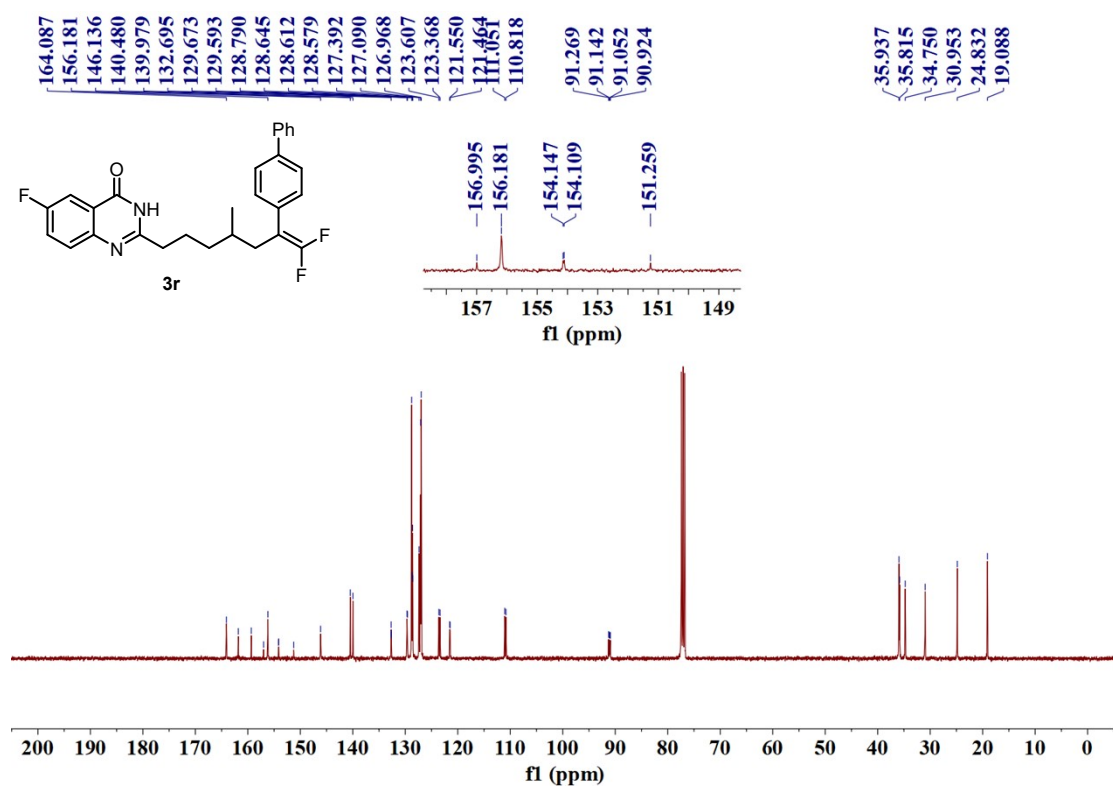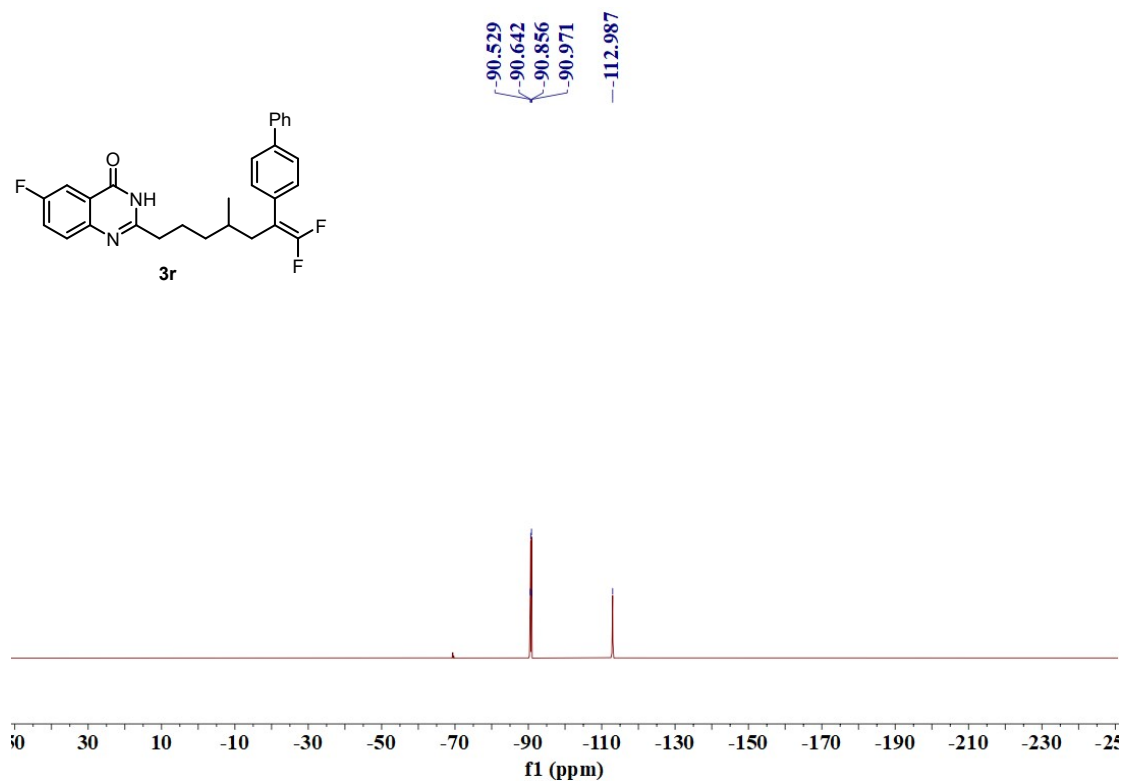

<sup>1</sup>H NMR, <sup>13</sup>C NMR and <sup>19</sup>F NMR spectra for product 3s (Chloroform-d)

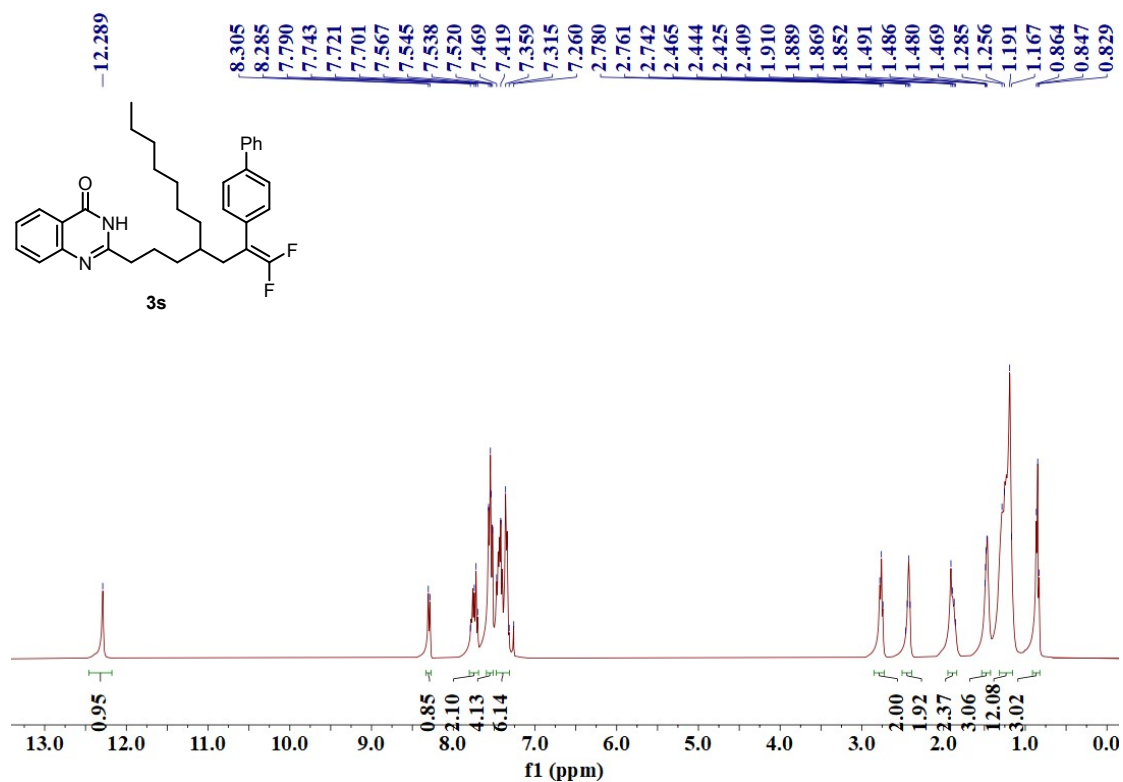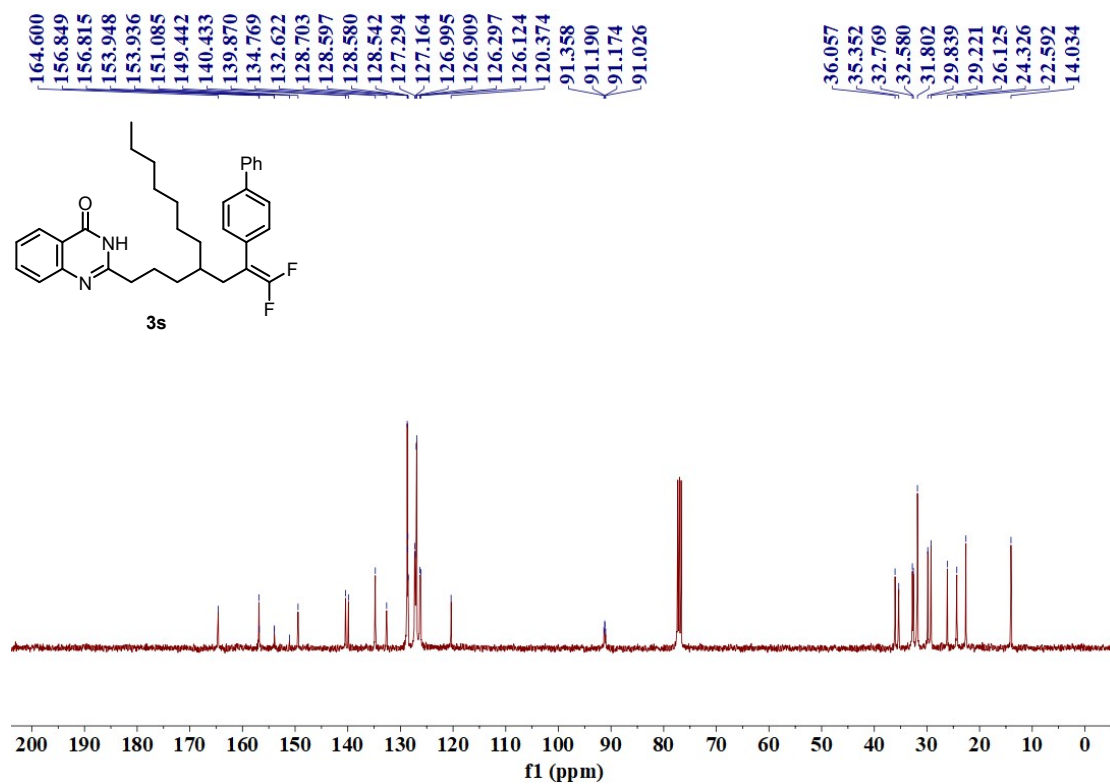

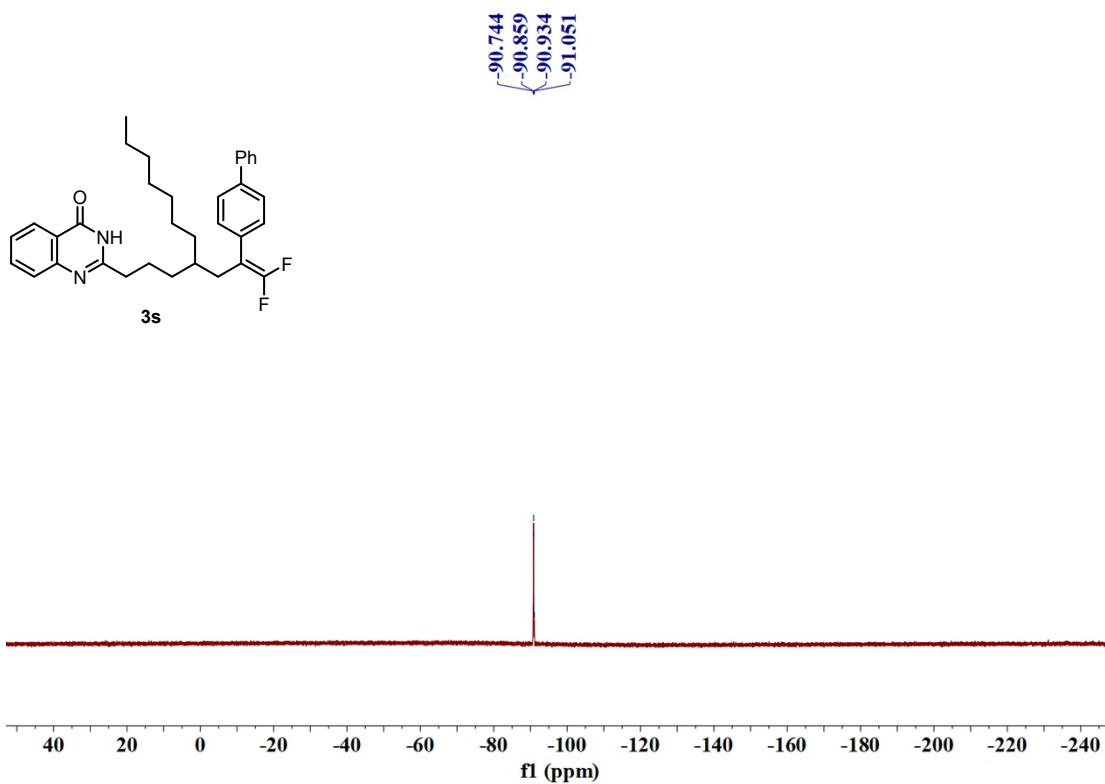

$^1\text{H}$  NMR,  $^{13}\text{C}$  NMR and  $^{19}\text{F}$  NMR spectra for product **3t** (Chloroform- $d$ )

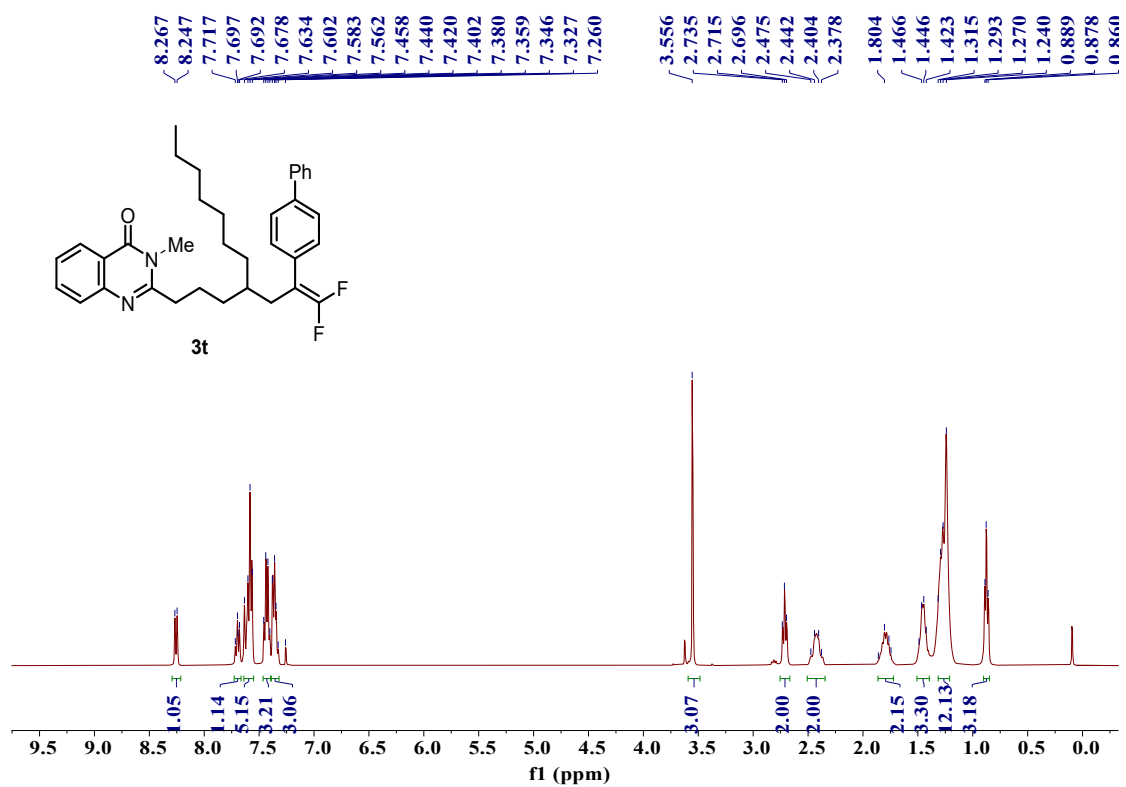

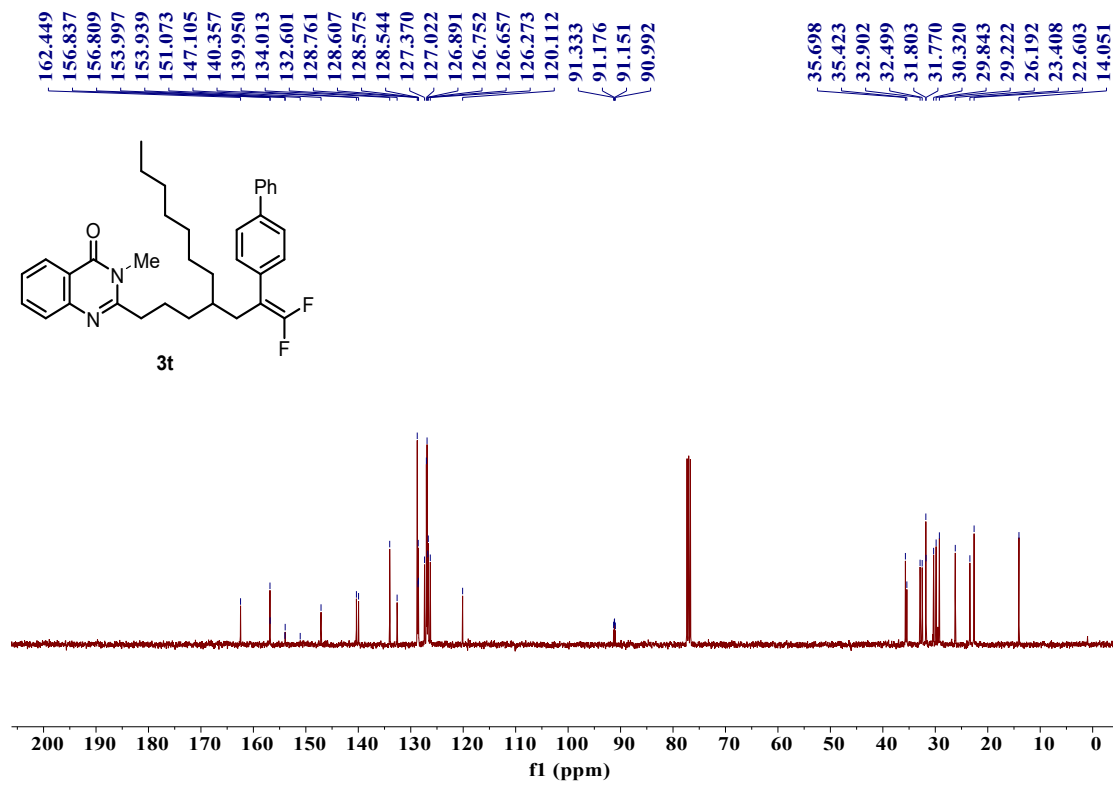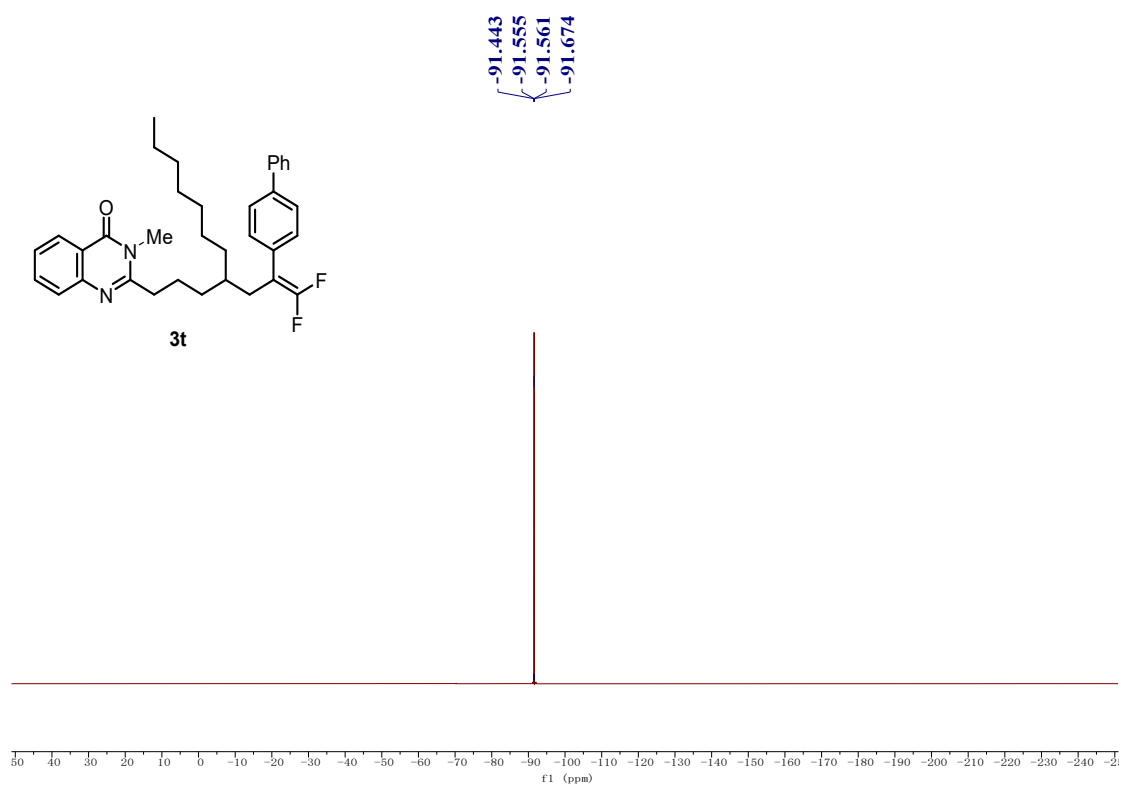

<sup>1</sup>H NMR, <sup>13</sup>C NMR and <sup>19</sup>F NMR spectra for product 3u (Chloroform-*d*)

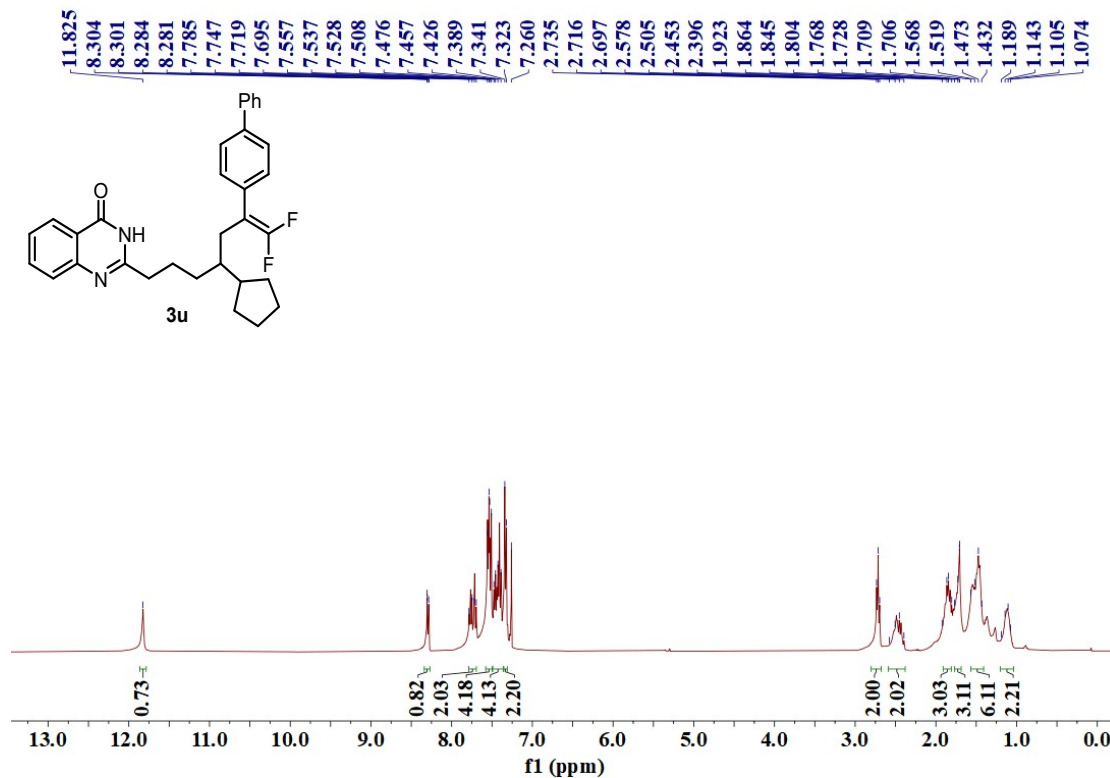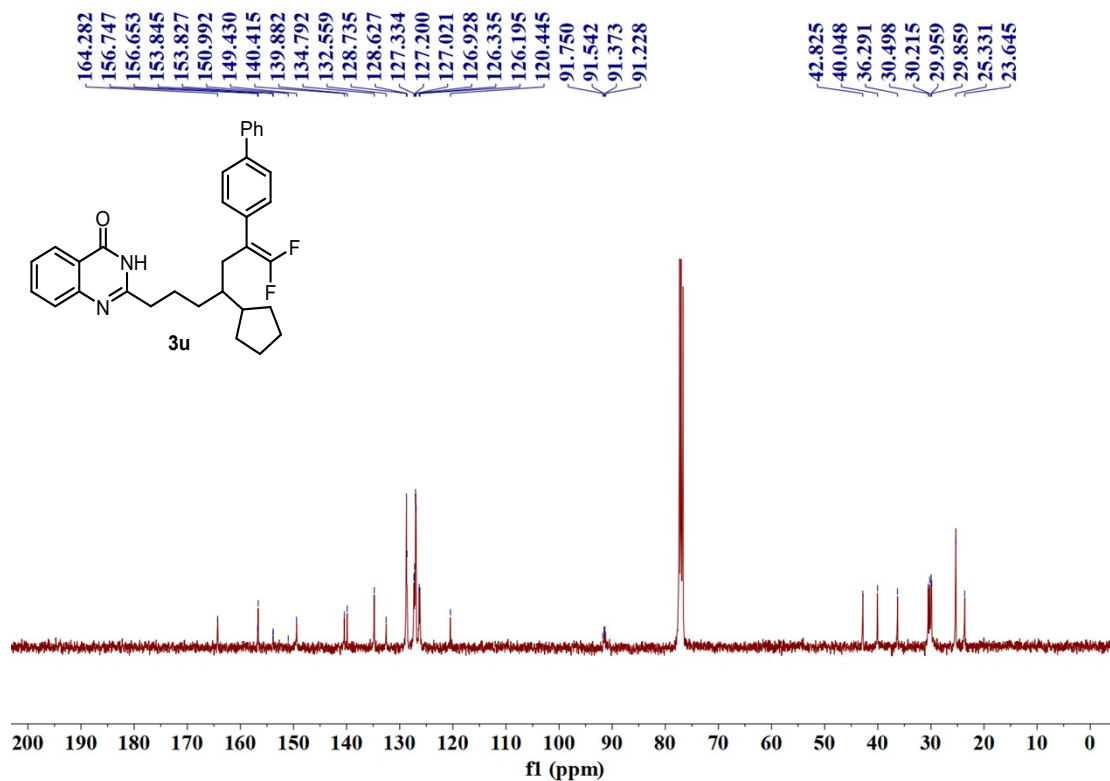



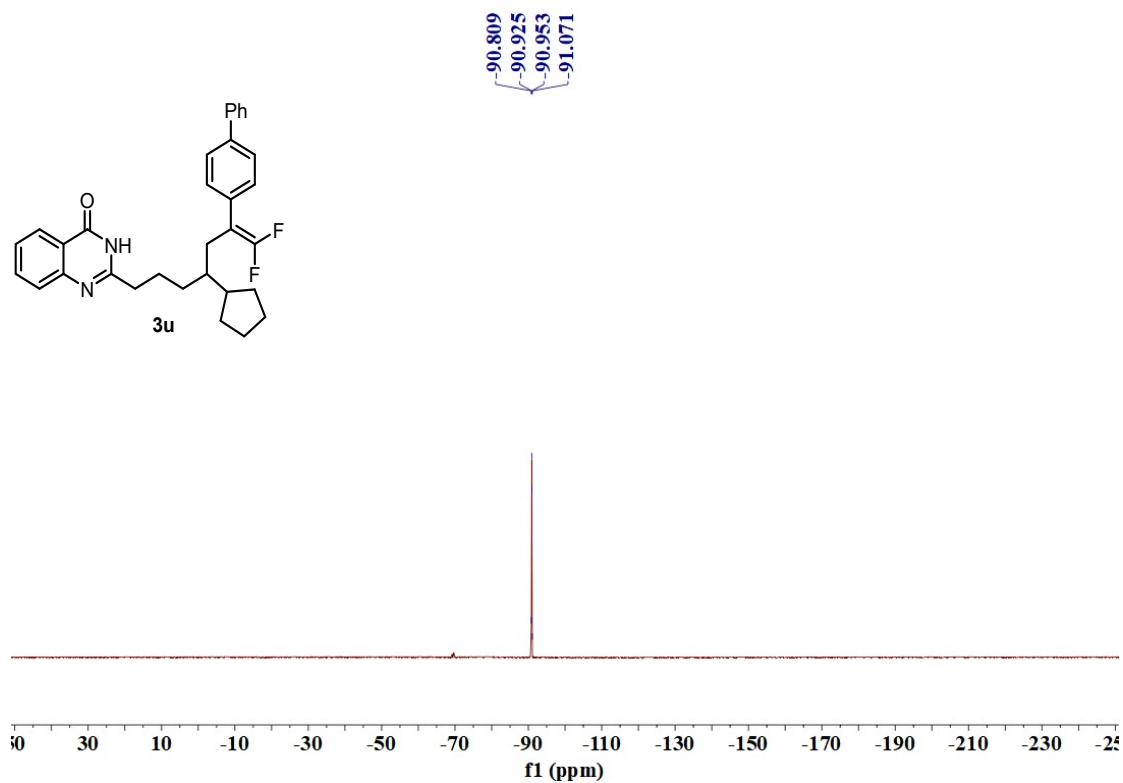

**<sup>1</sup>H NMR, <sup>13</sup>C NMR and <sup>19</sup>F NMR spectra for product 3v (Chloroform-*d*)**

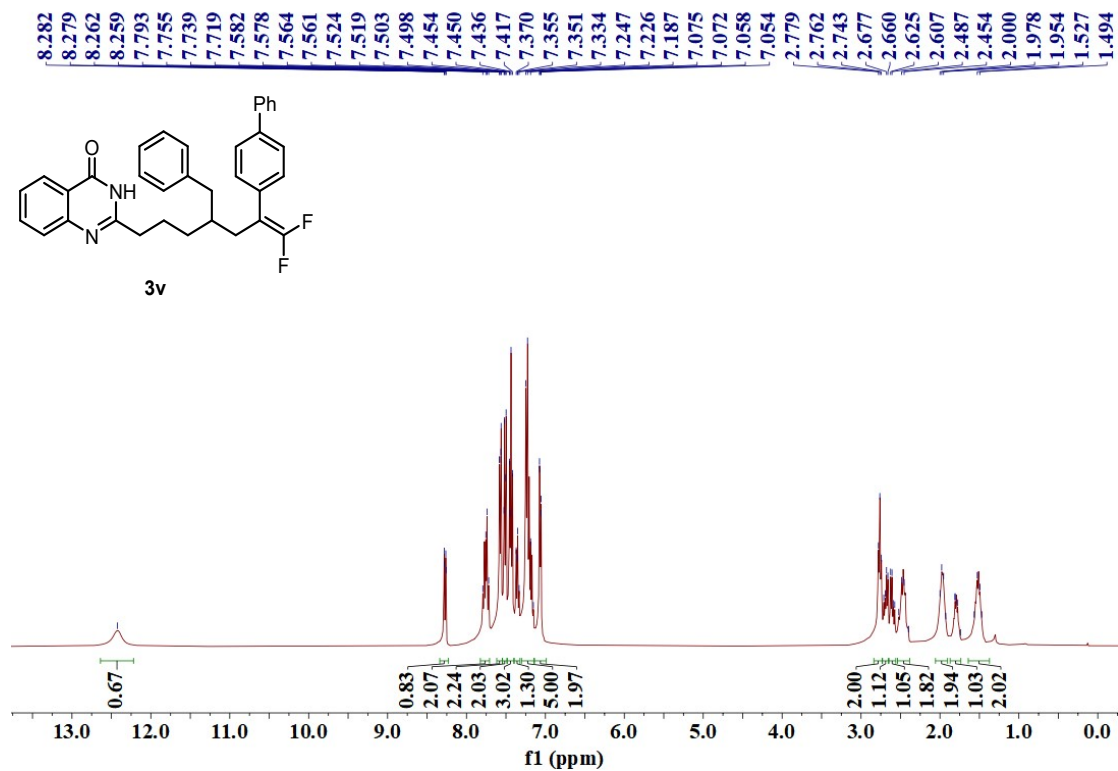

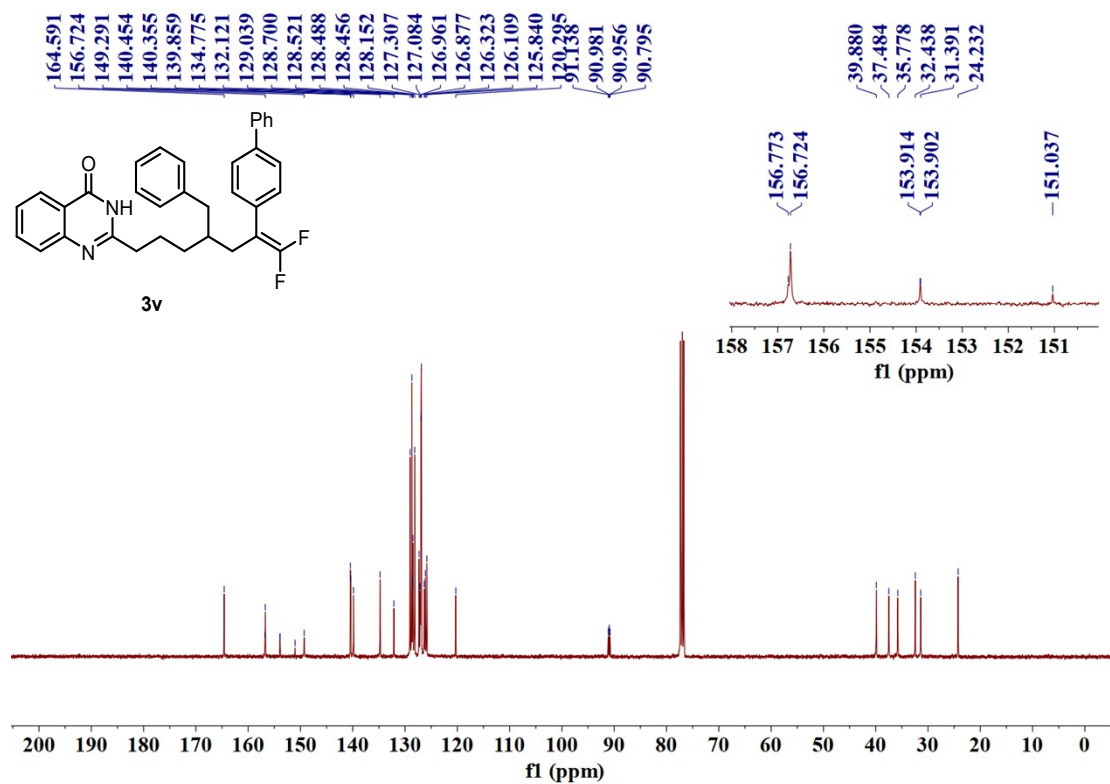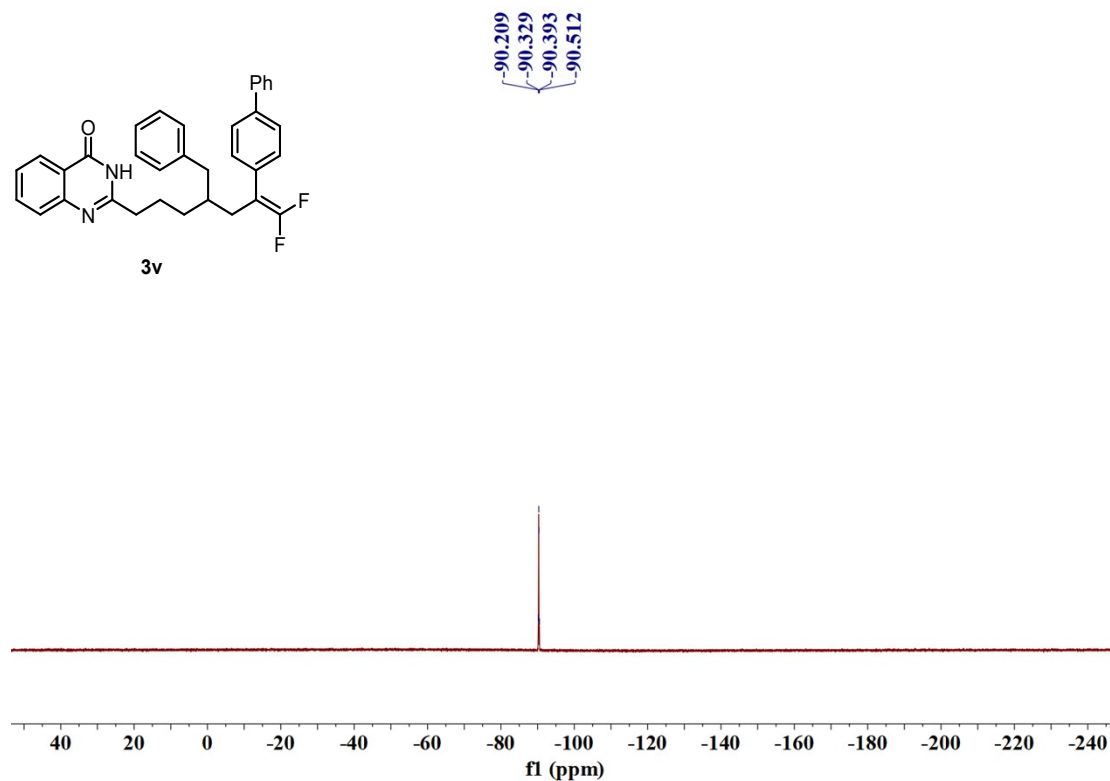

<sup>1</sup>H NMR, <sup>13</sup>C NMR and <sup>19</sup>F NMR spectra for product 3w (Chloroform-d)

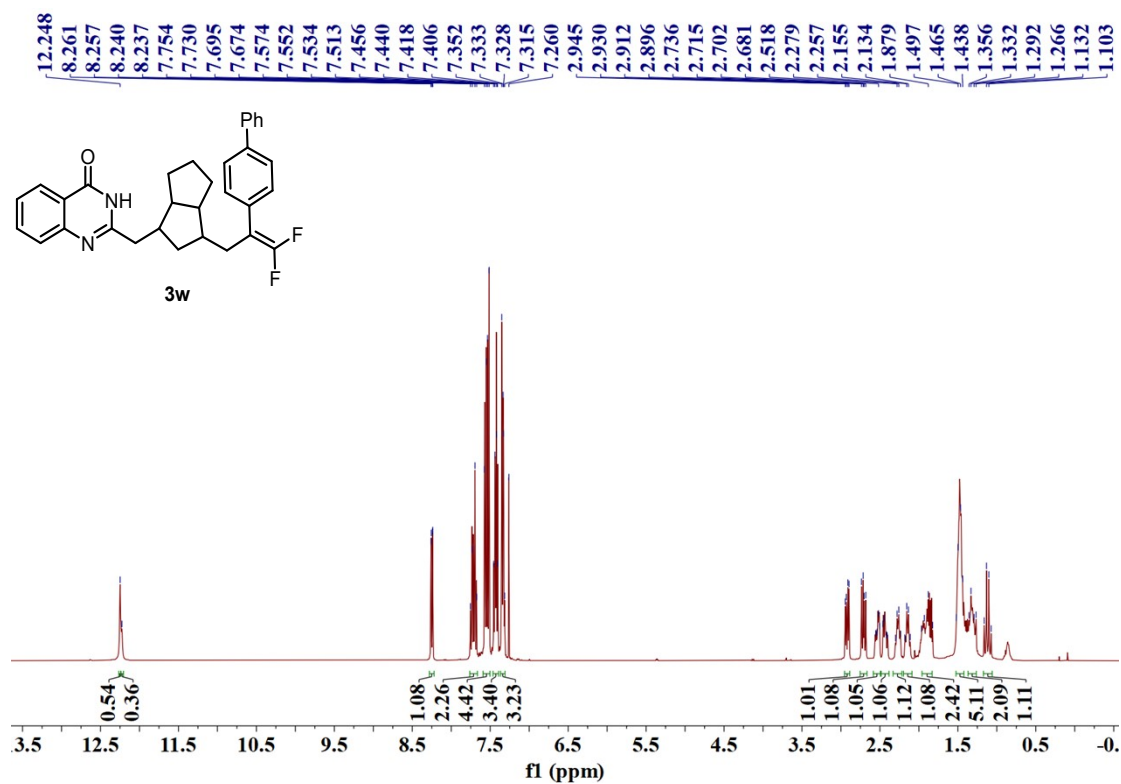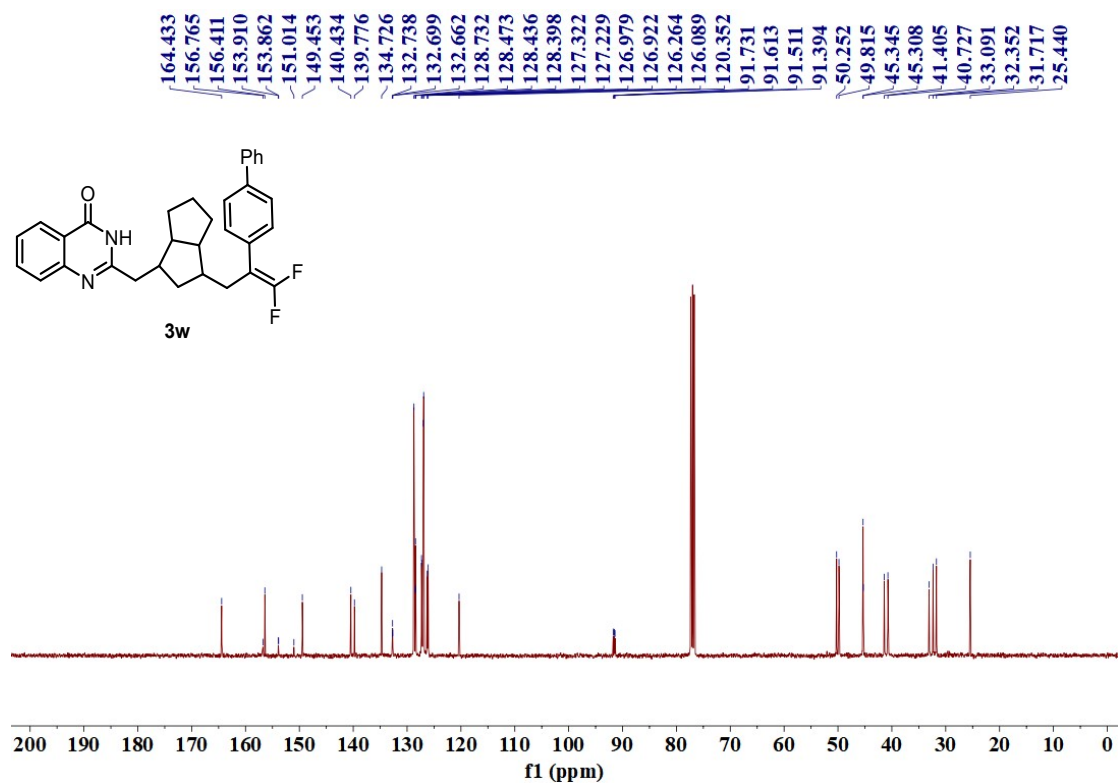

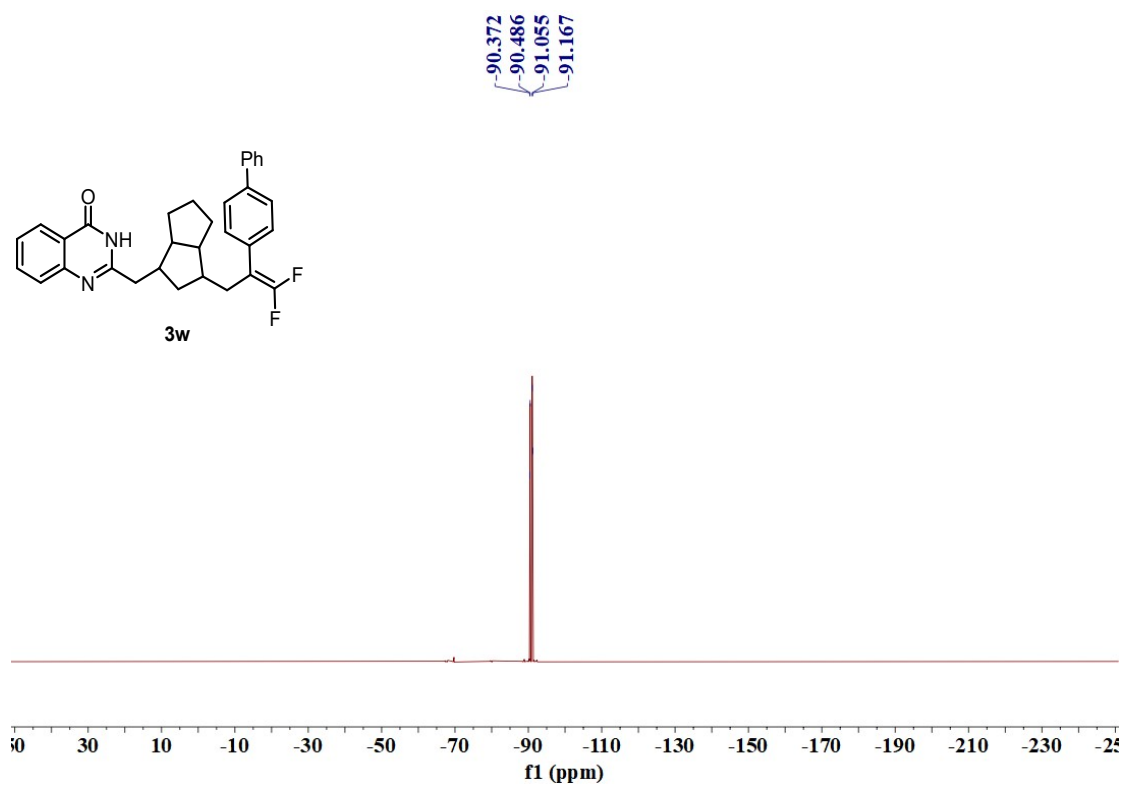

**<sup>1</sup>H NMR, <sup>13</sup>C NMR and <sup>19</sup>F NMR spectra for product 3x (Chloroform-*d*)**

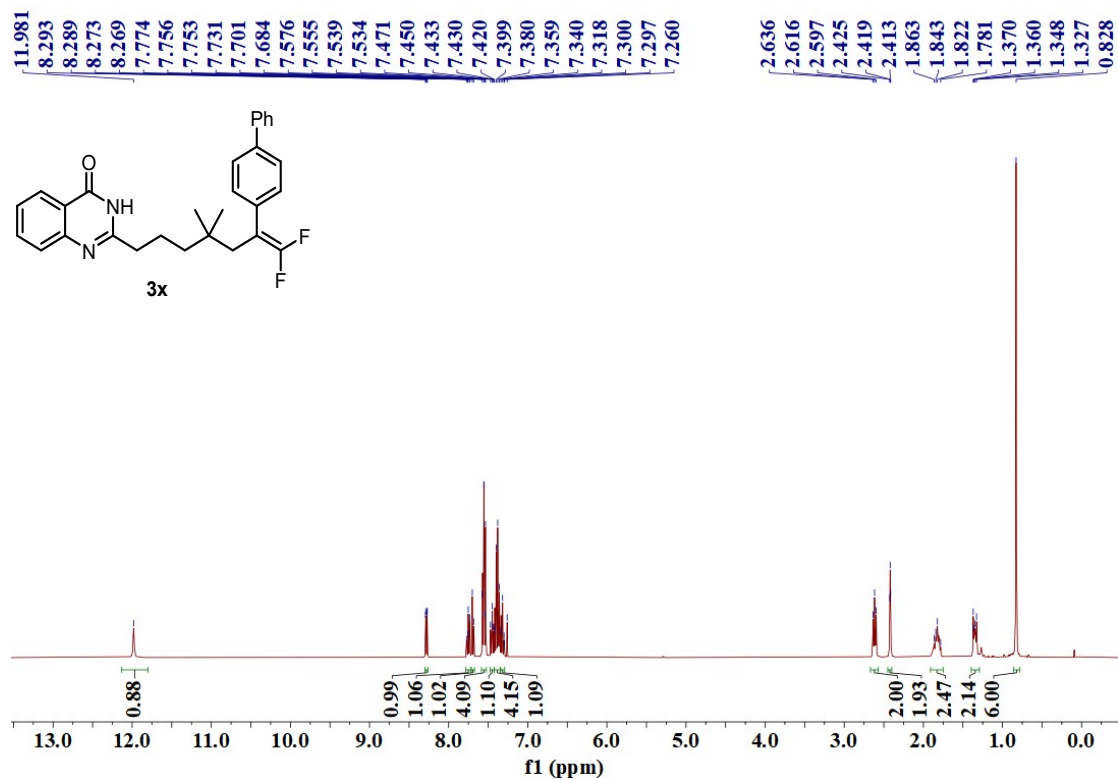

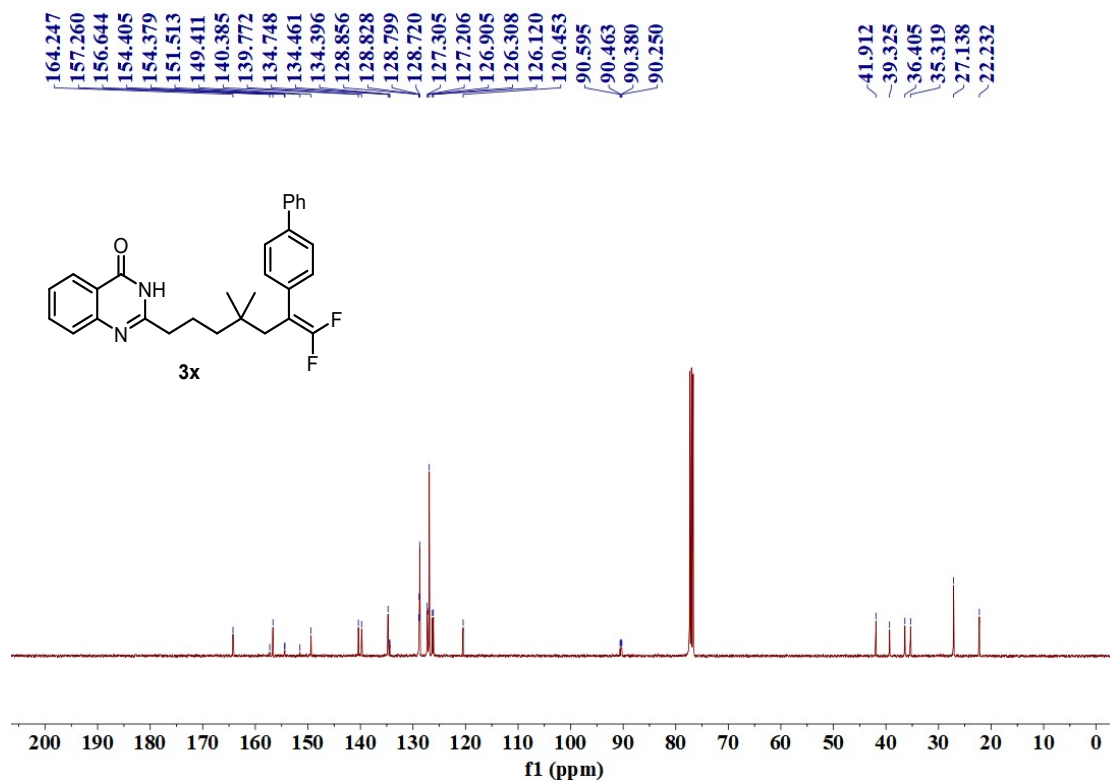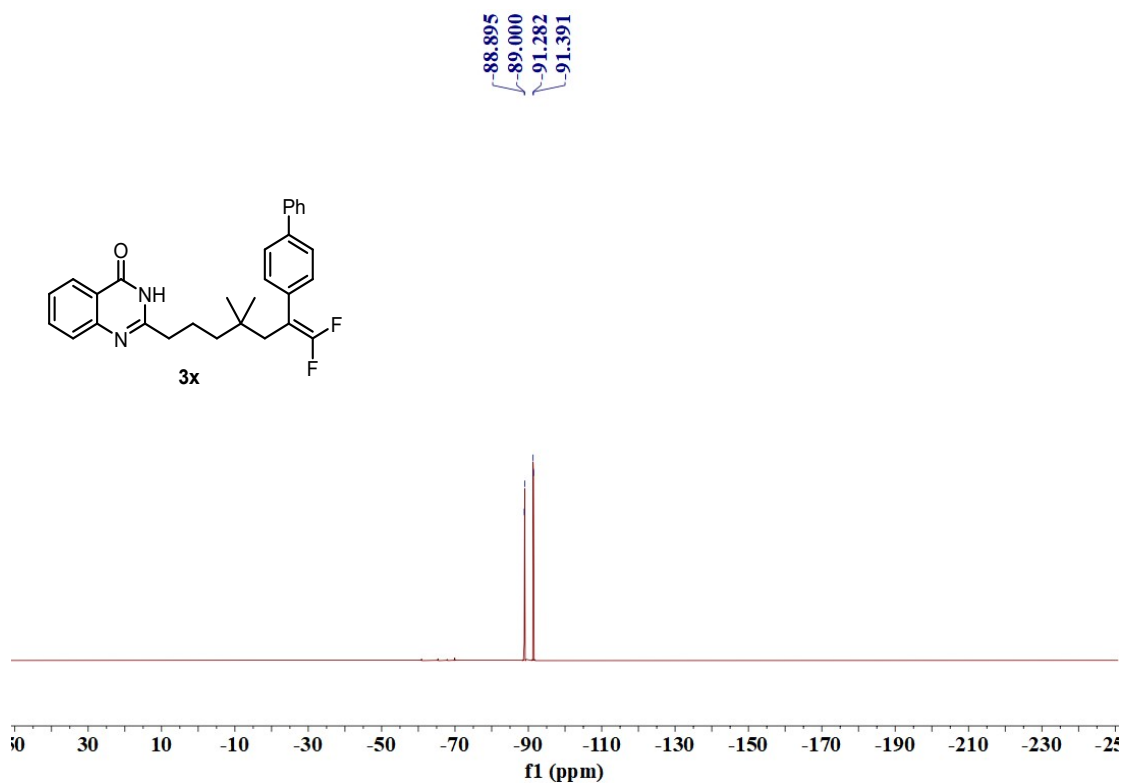

<sup>1</sup>H NMR, <sup>13</sup>C NMR and <sup>19</sup>F NMR spectra for product 3y (Chloroform-*d*)

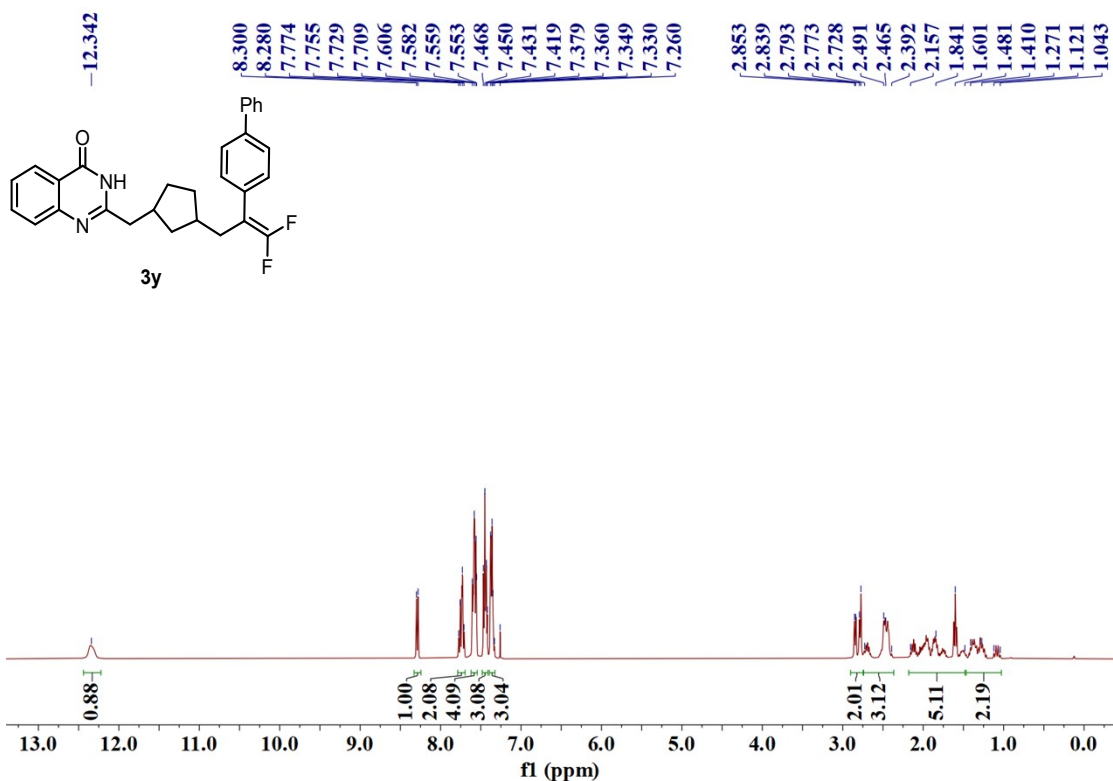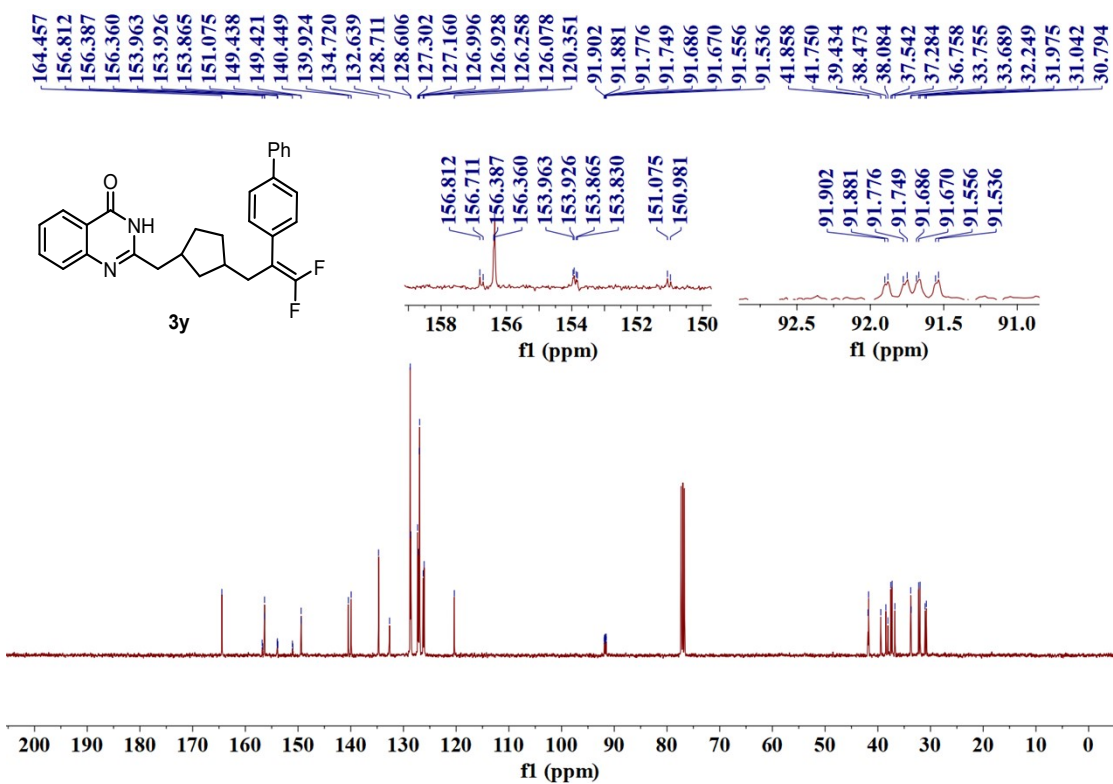

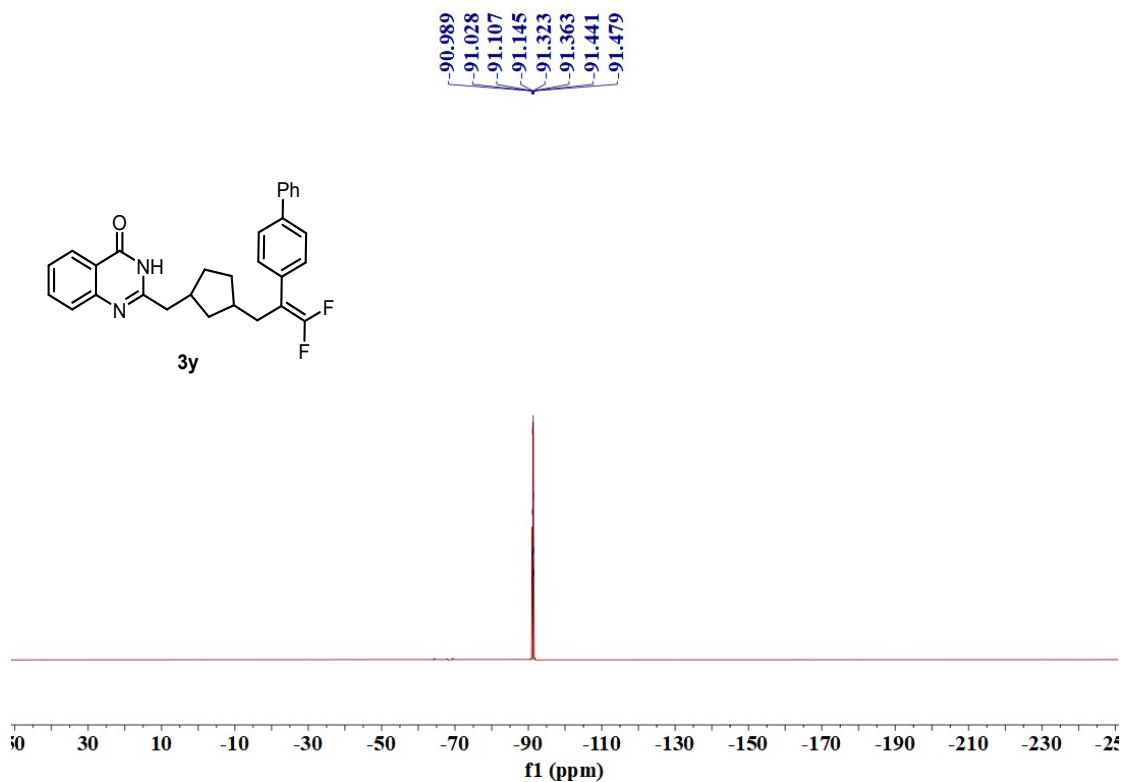

**$^1\text{H}$  NMR,  $^{13}\text{C}$  NMR and  $^{19}\text{F}$  NMR spectra for product **3z** (DMSO- $d_6$ )**

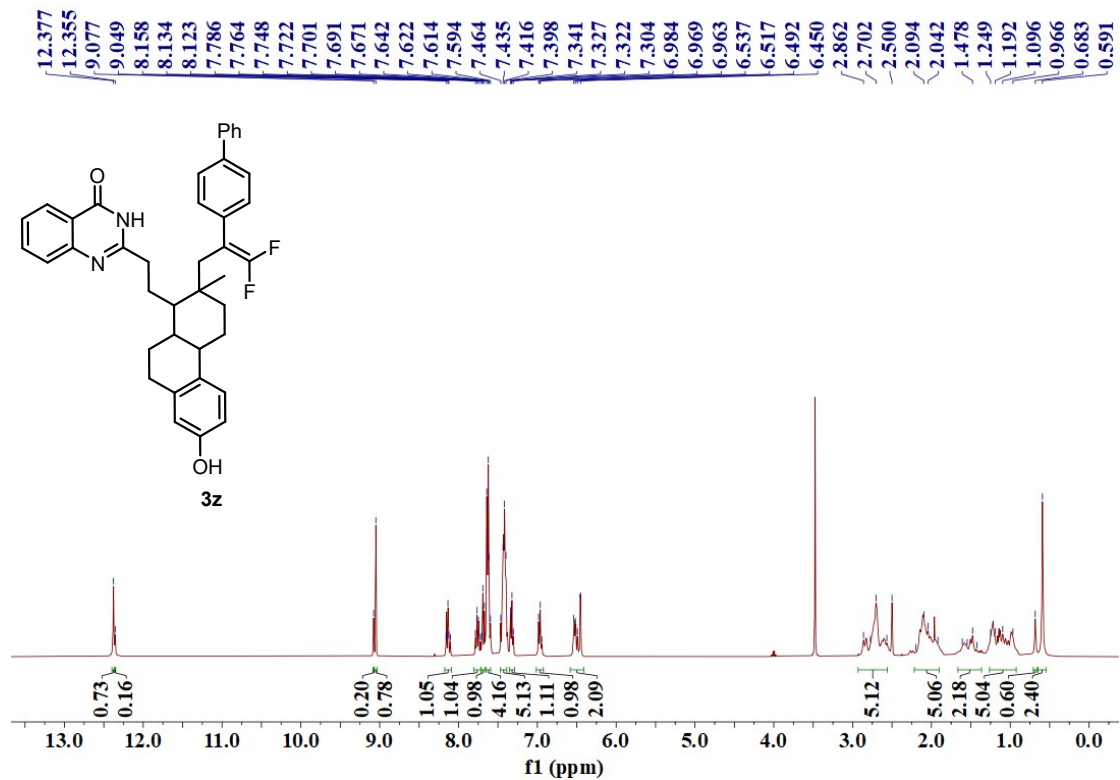

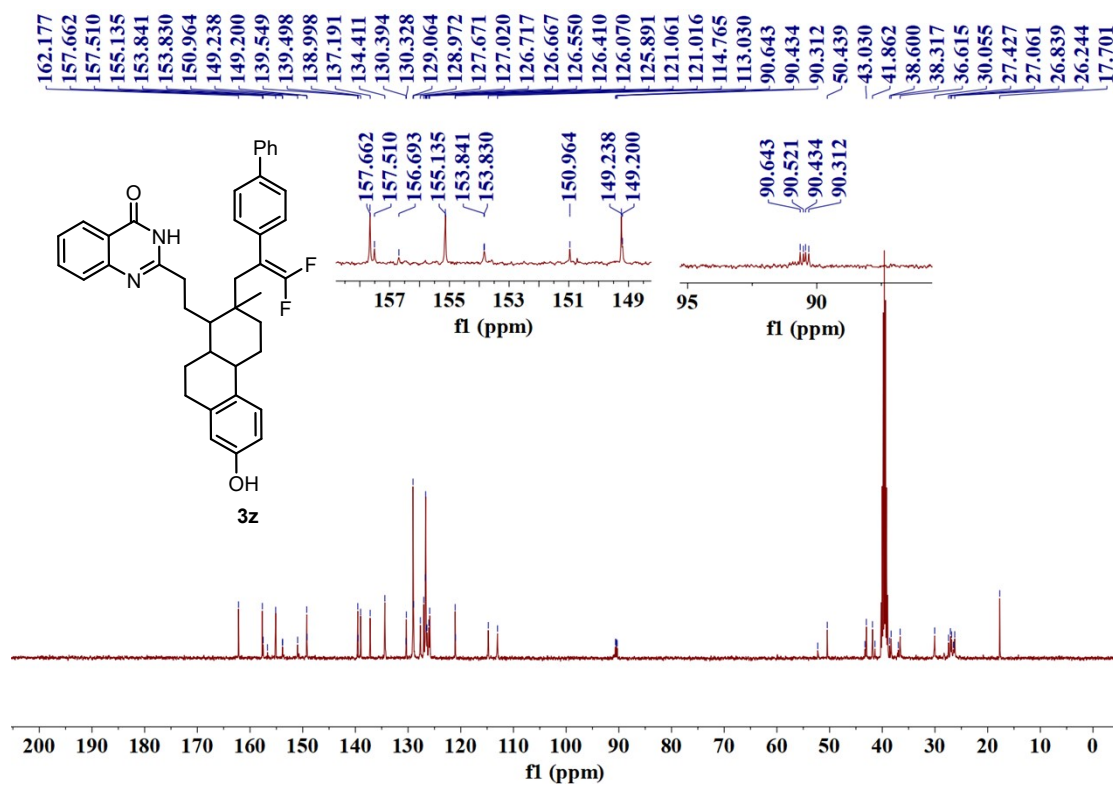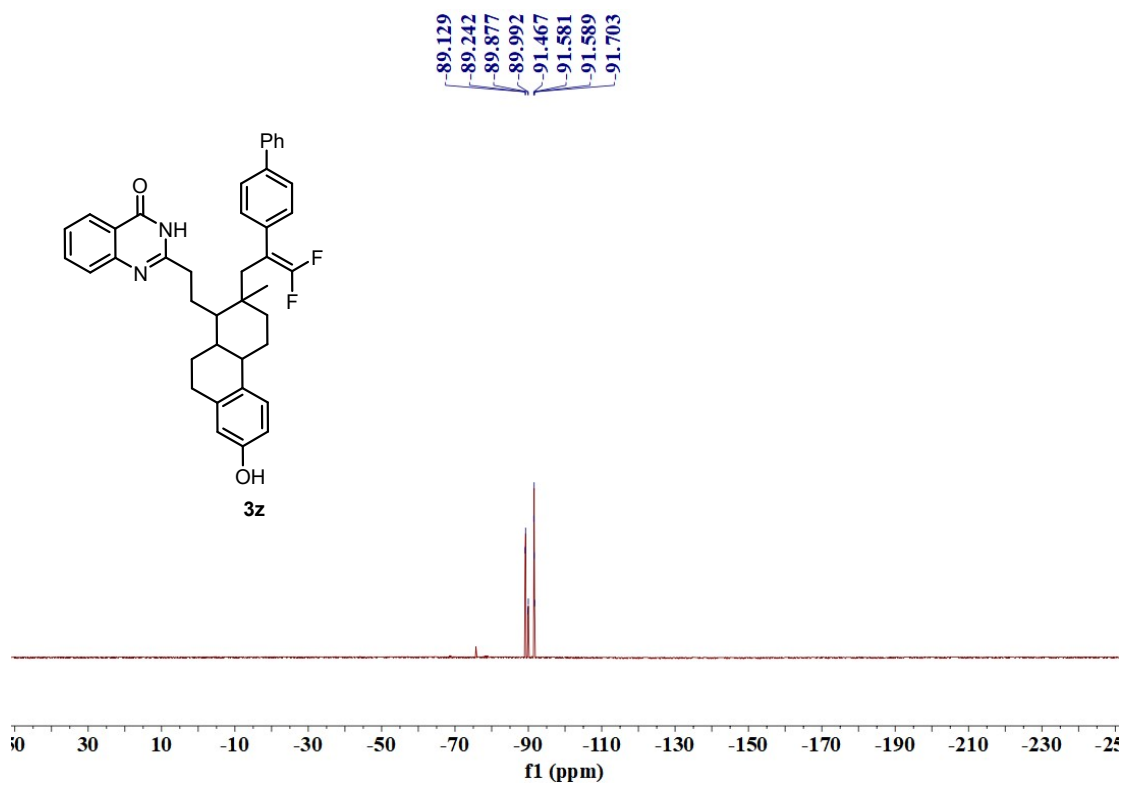



<sup>1</sup>H NMR, <sup>13</sup>C NMR and <sup>19</sup>F NMR spectra for product 3w (Chloroform-d)

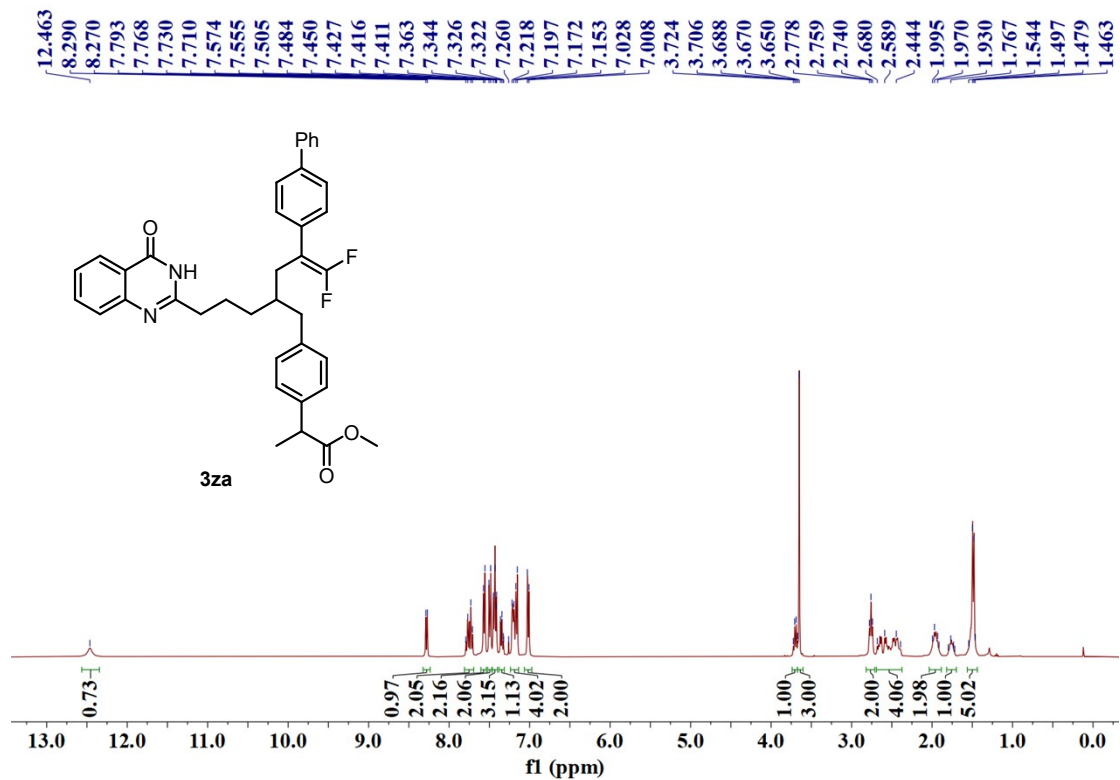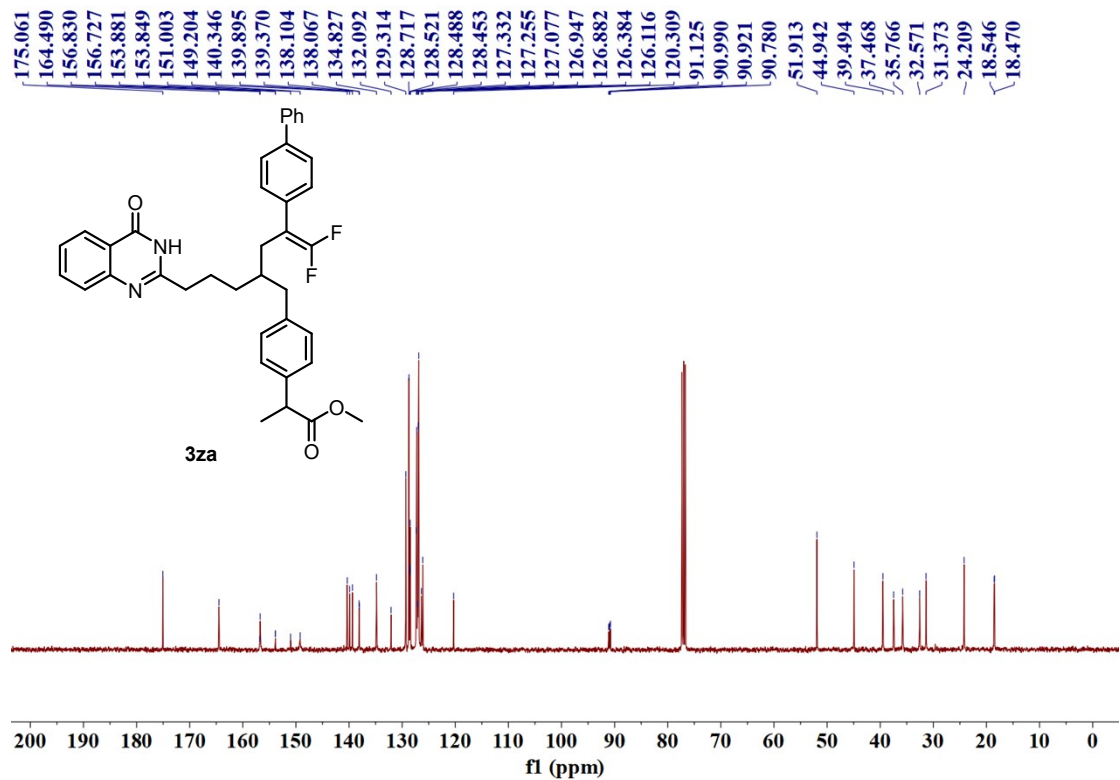

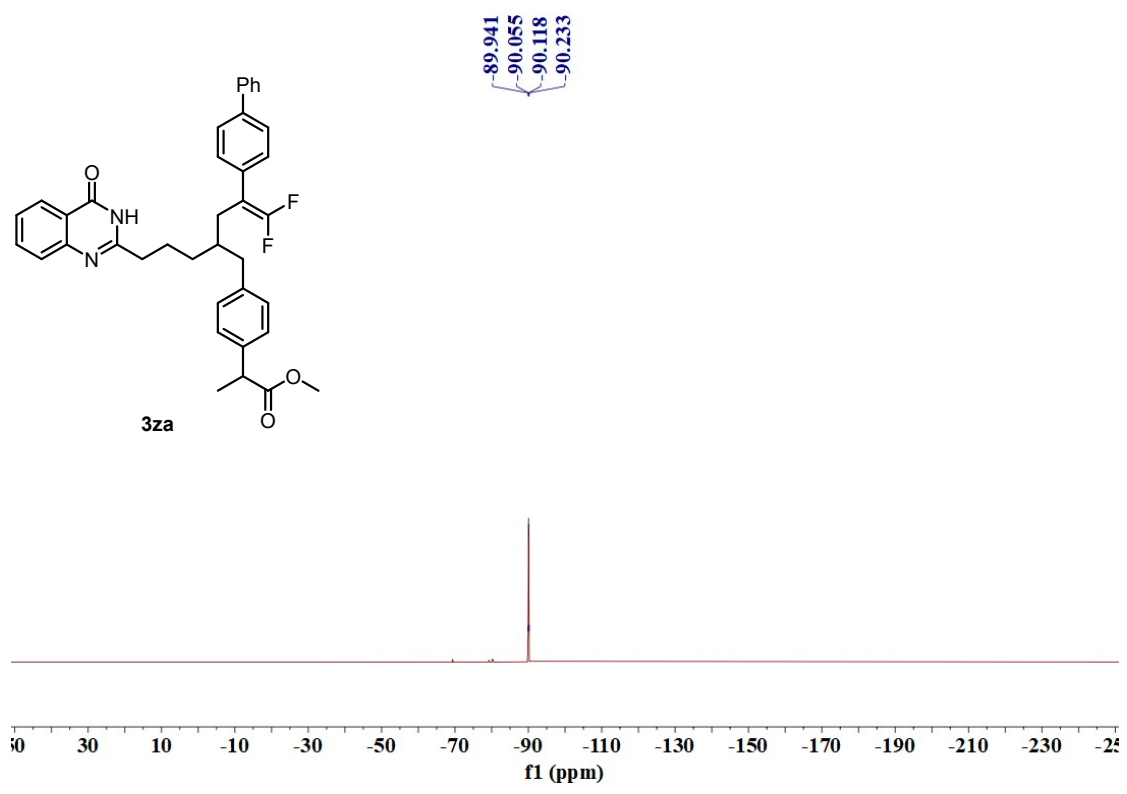

<sup>1</sup>H NMR, <sup>13</sup>C NMR and <sup>19</sup>F NMR spectra for product 4a (Chloroform-*d*)

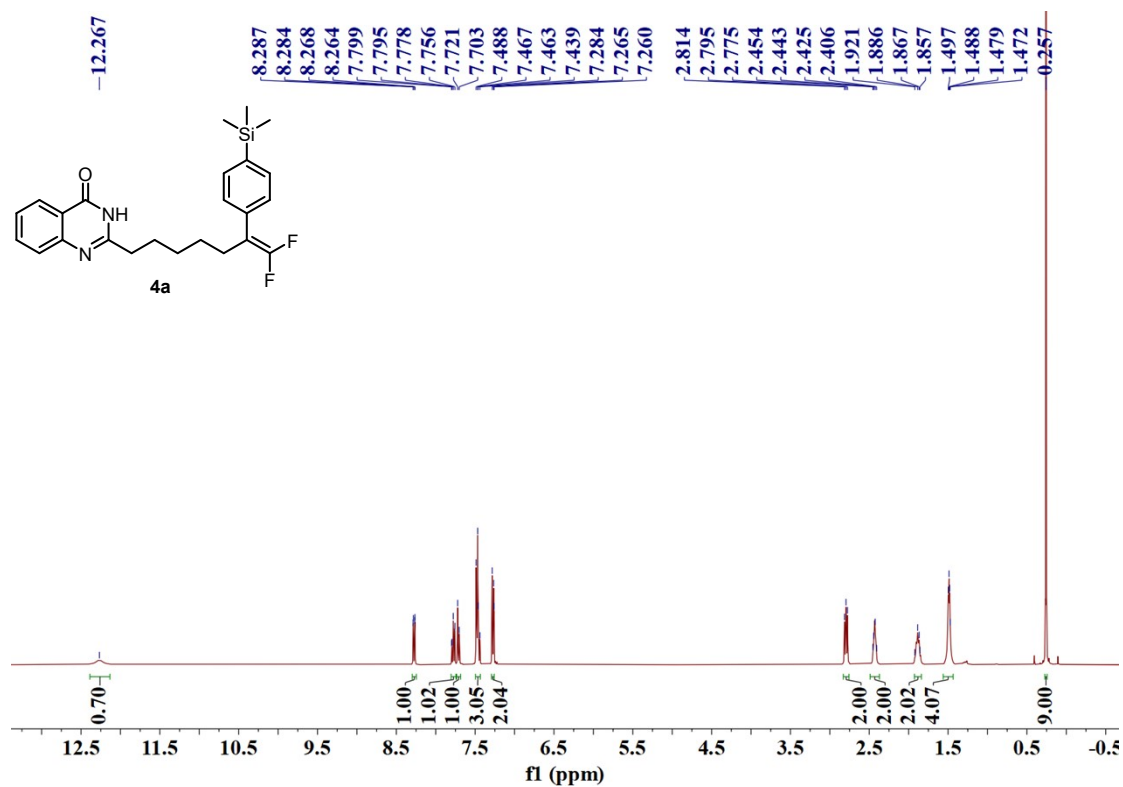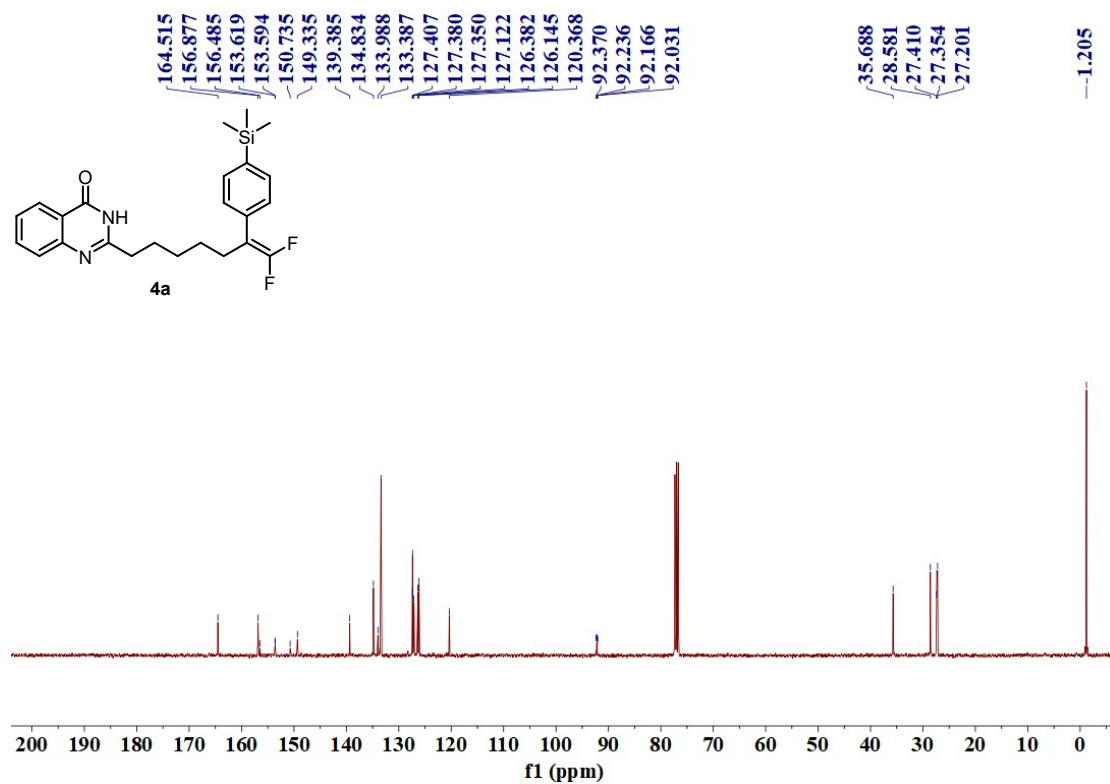

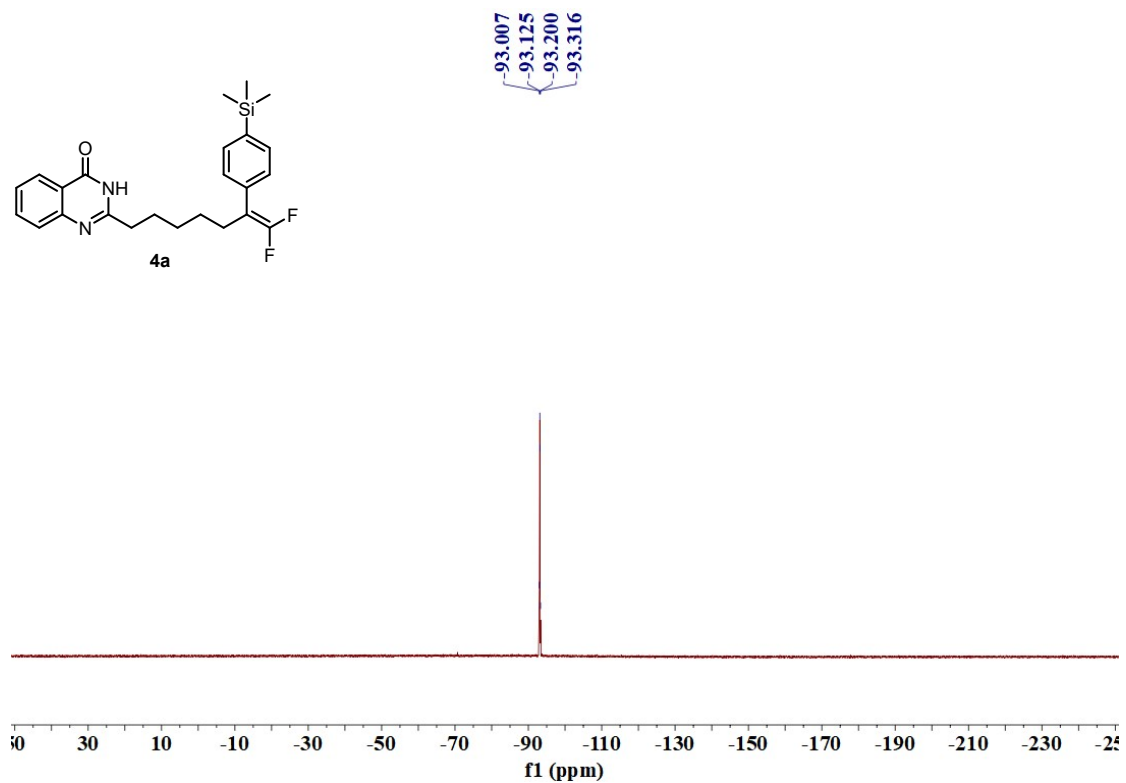

**$^1\text{H}$  NMR,  $^{13}\text{C}$  NMR and  $^{19}\text{F}$  NMR spectra for product 4b (Chloroform-*d*)**

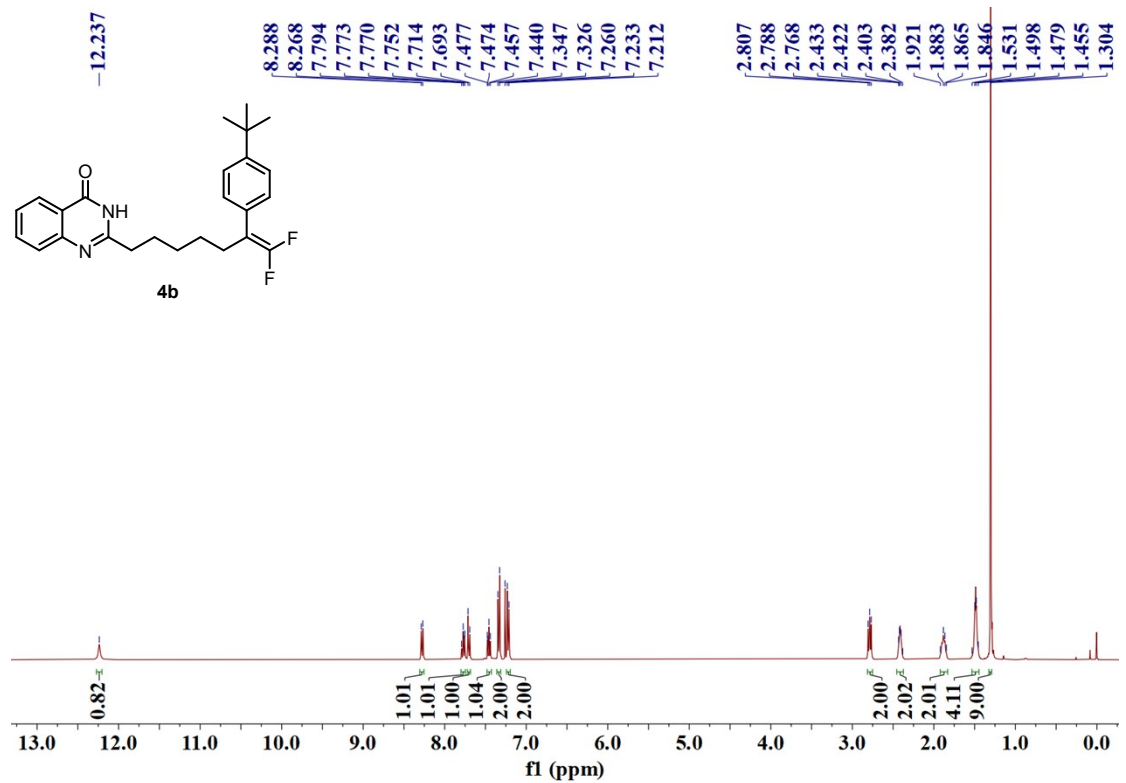

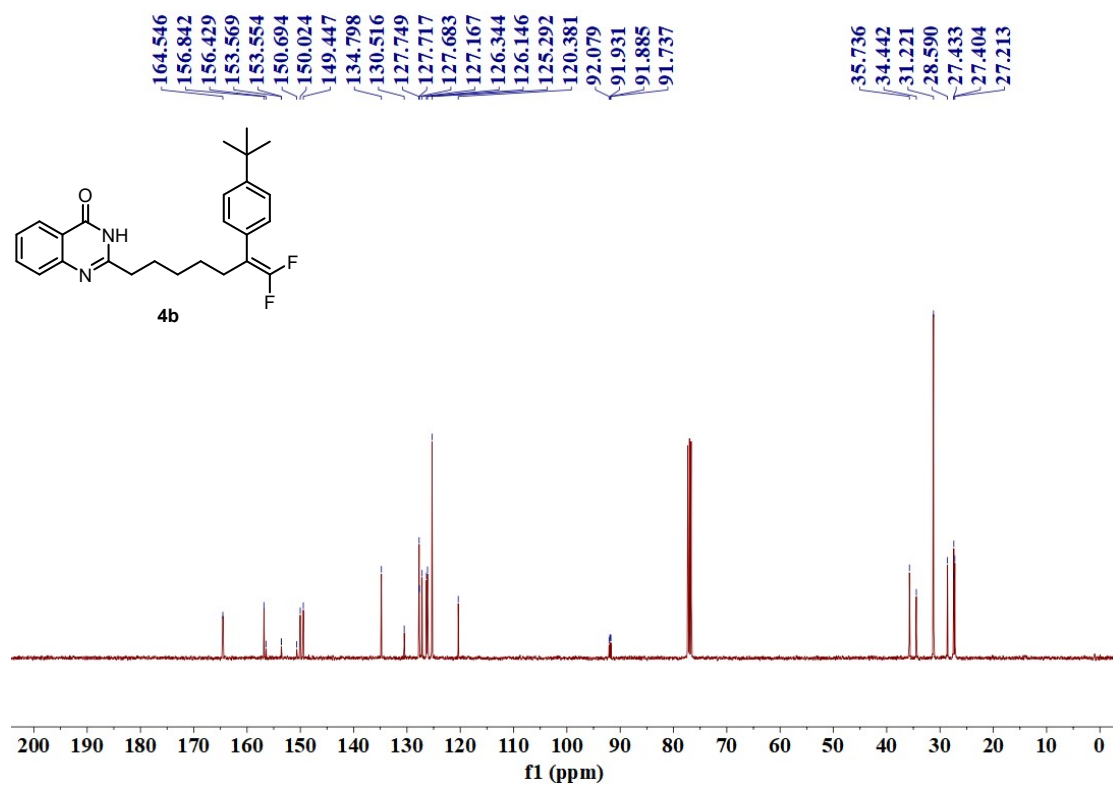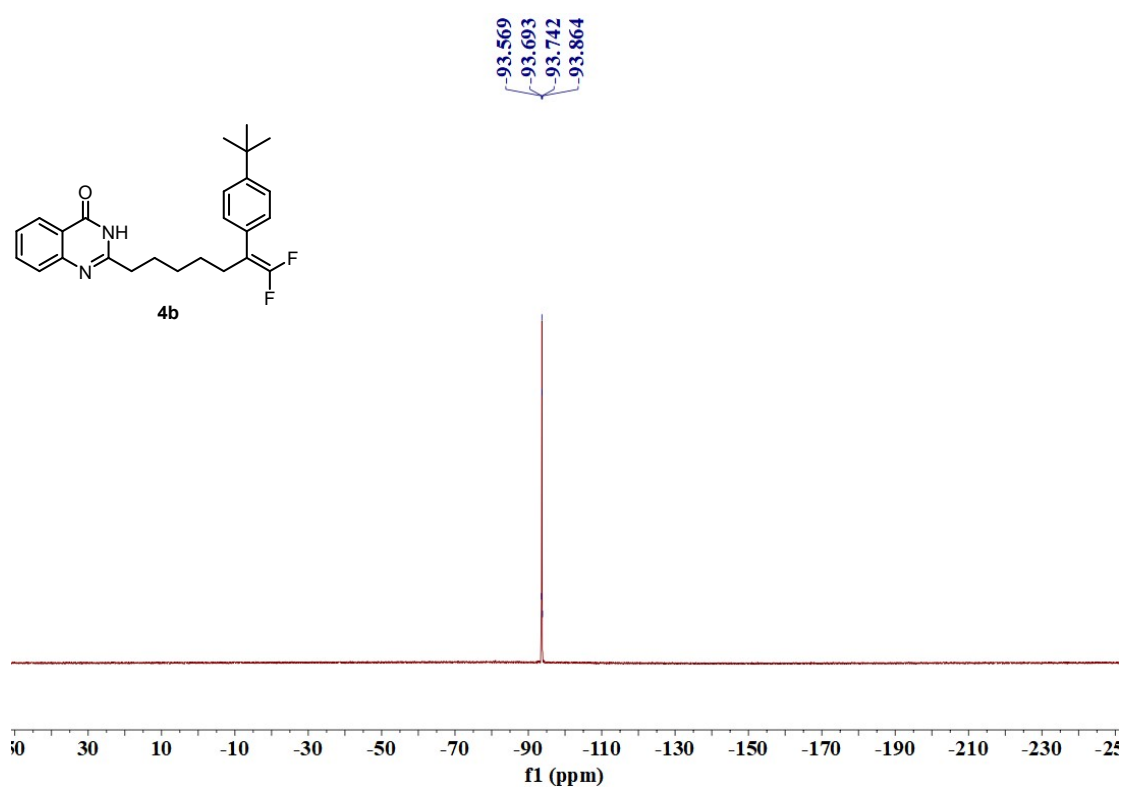

<sup>1</sup>H NMR, <sup>13</sup>C NMR and <sup>19</sup>F NMR spectra for product 4c (Chloroform-d)

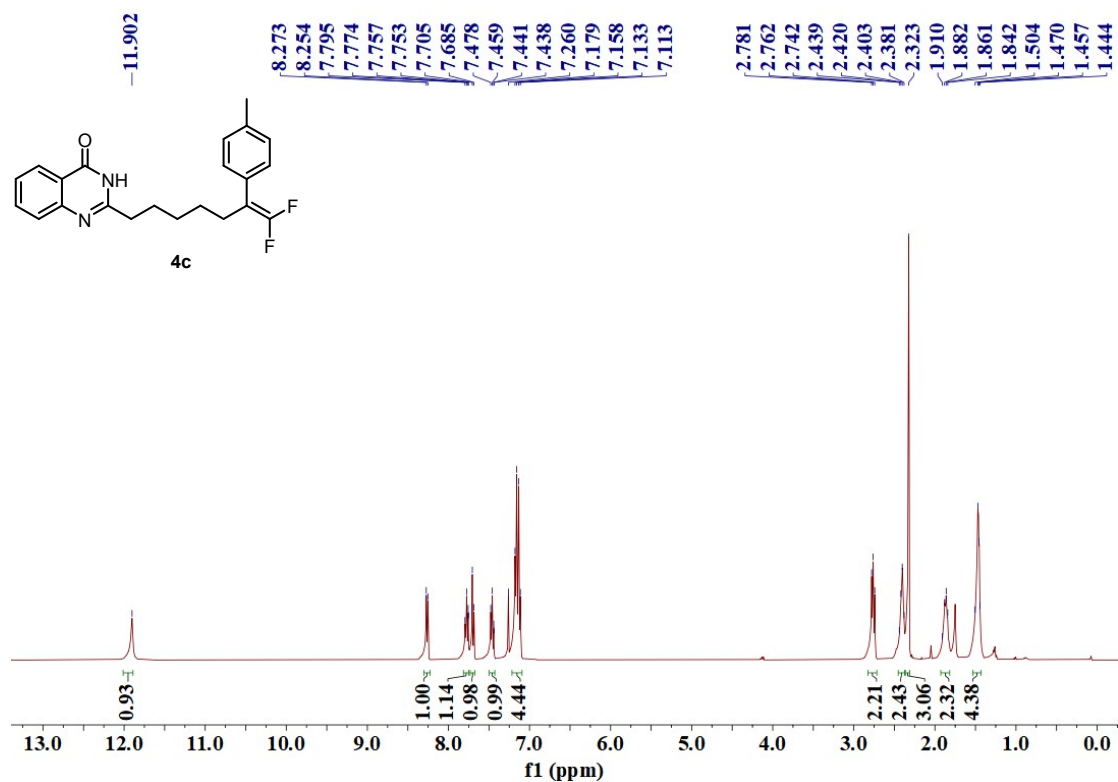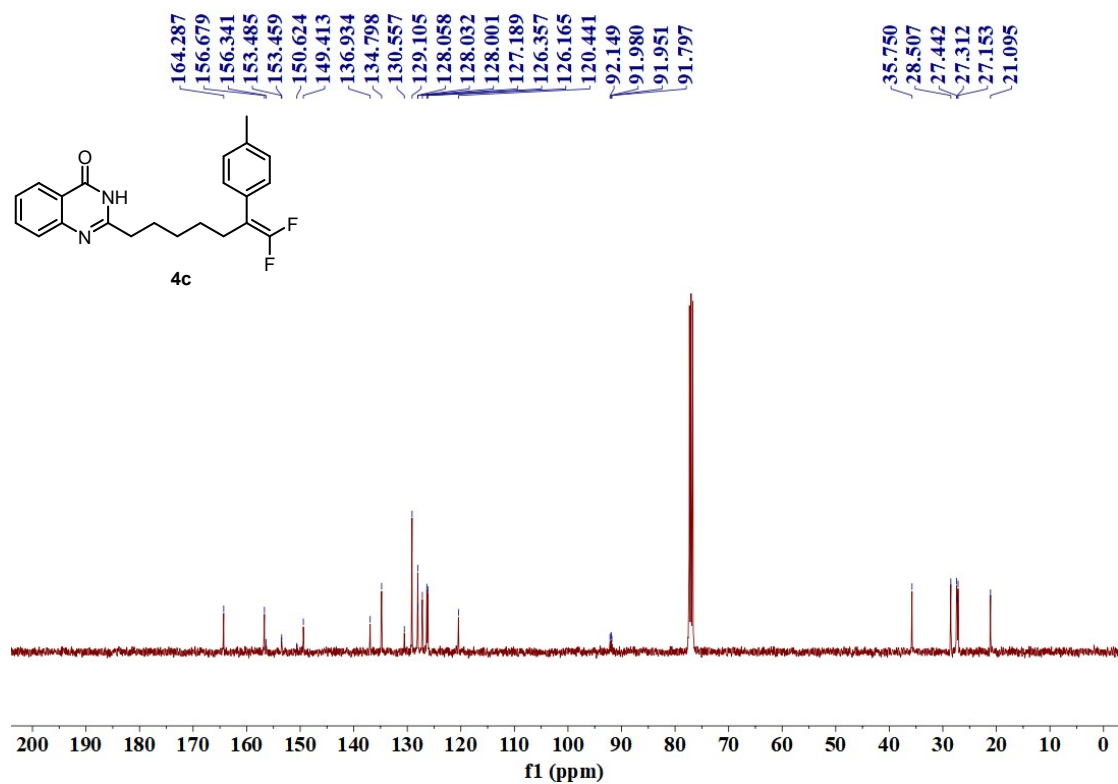

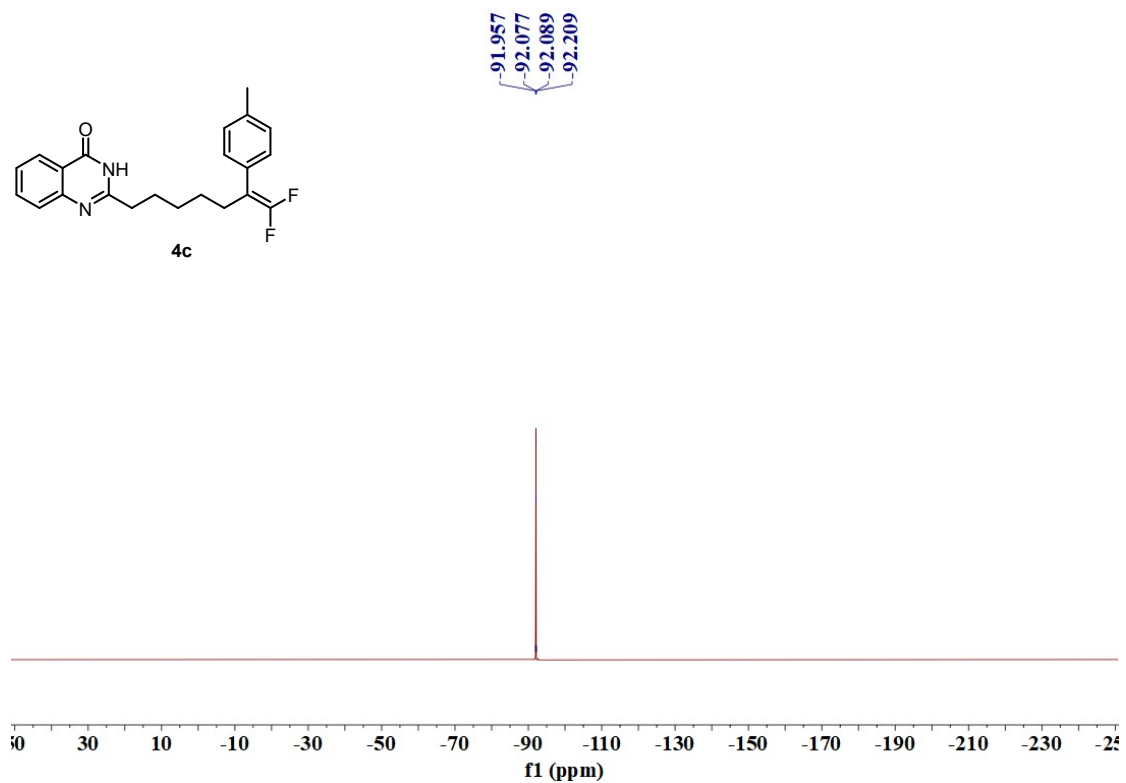

$^1\text{H}$  NMR,  $^{13}\text{C}$  NMR and  $^{19}\text{F}$  NMR spectra for product 4d (Chloroform-*d*)

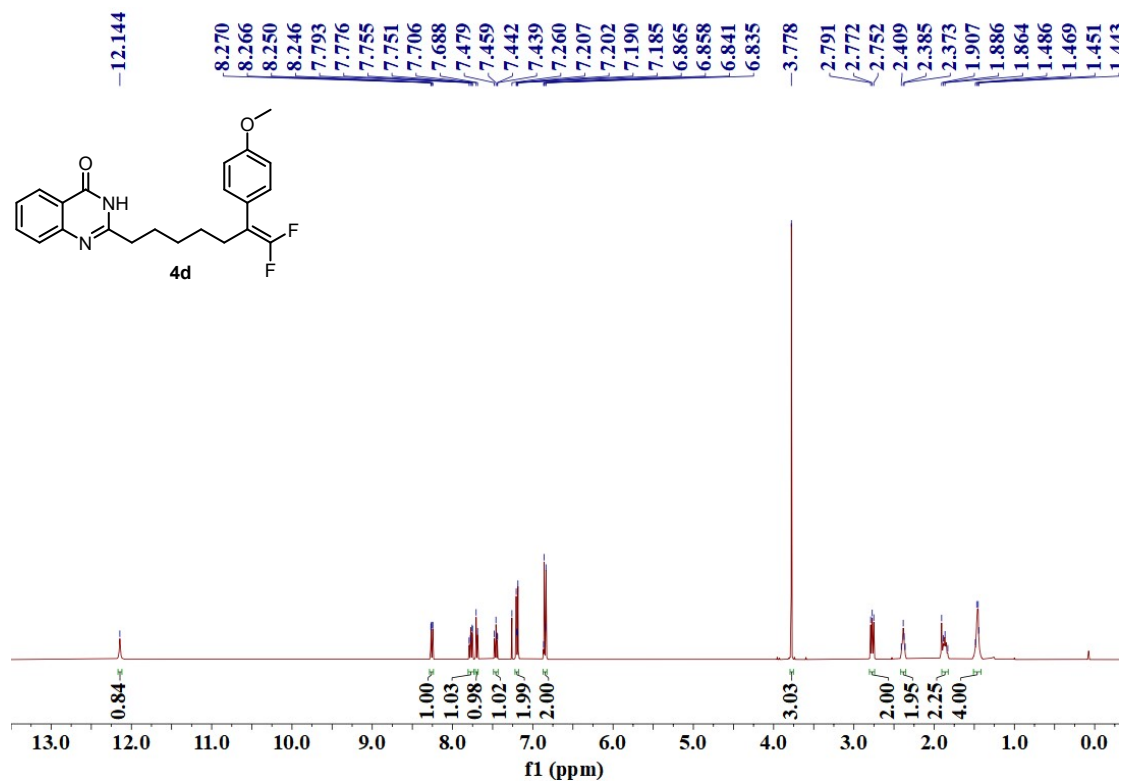

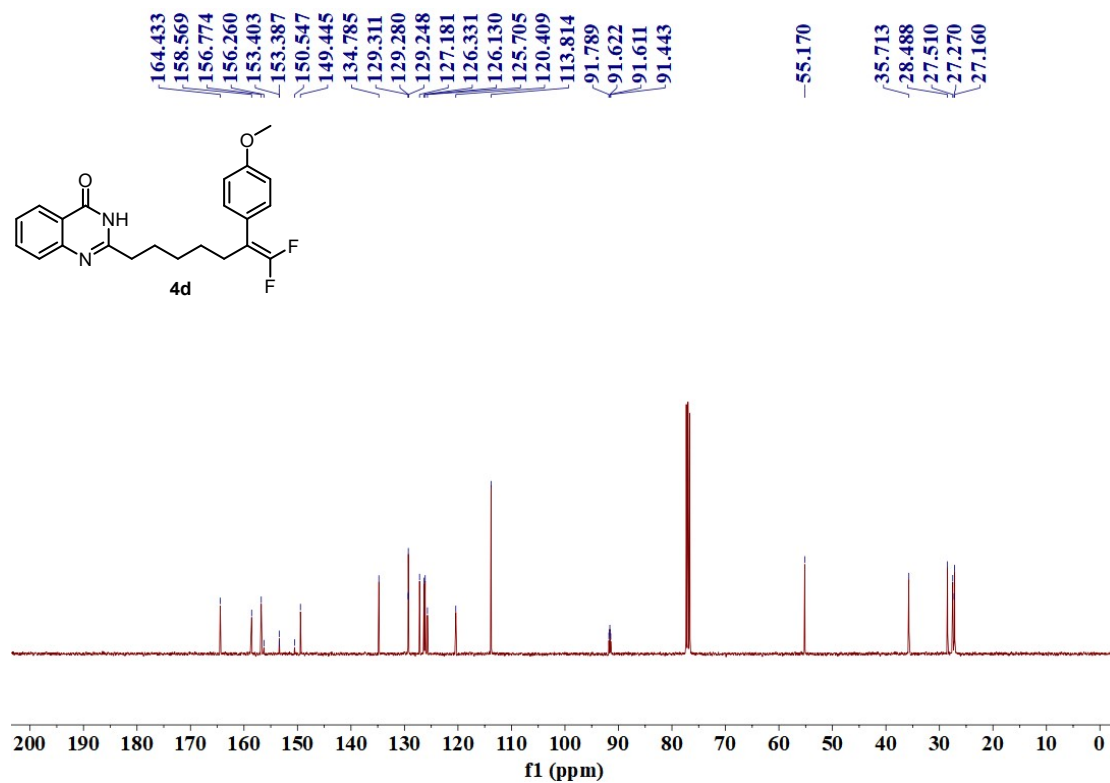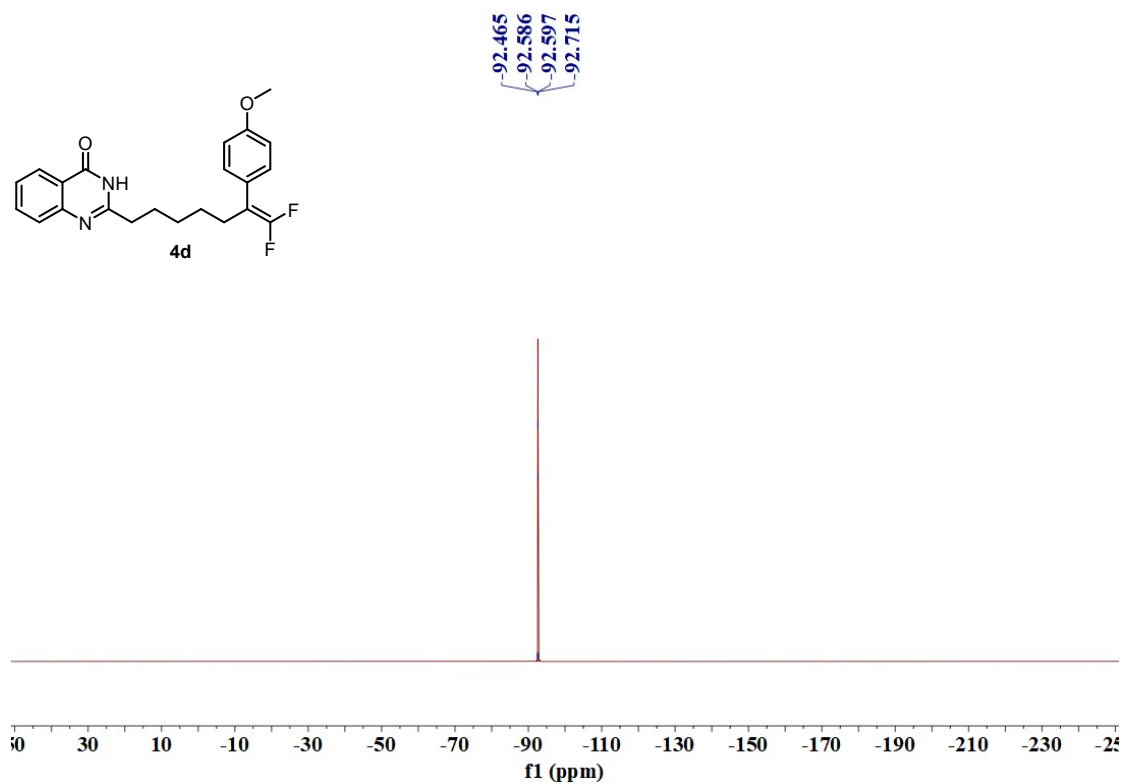



<sup>1</sup>H NMR, <sup>13</sup>C NMR and <sup>19</sup>F NMR spectra for product 4e (Chloroform-d)

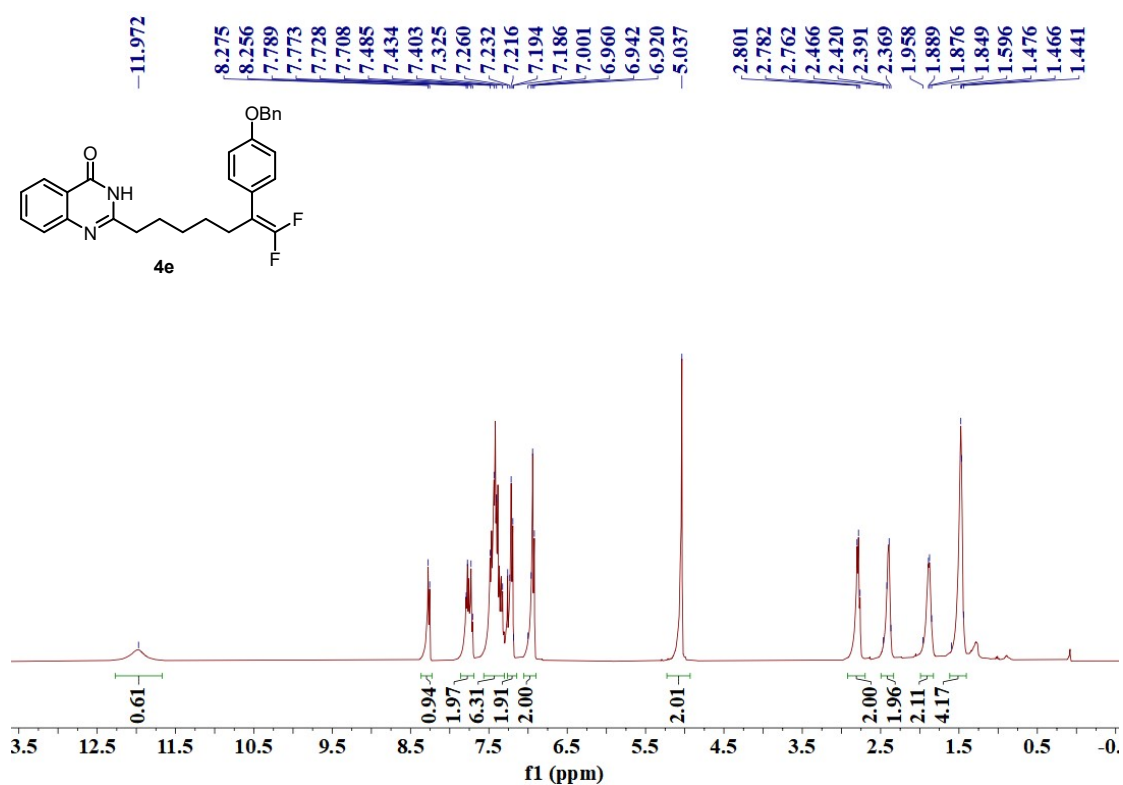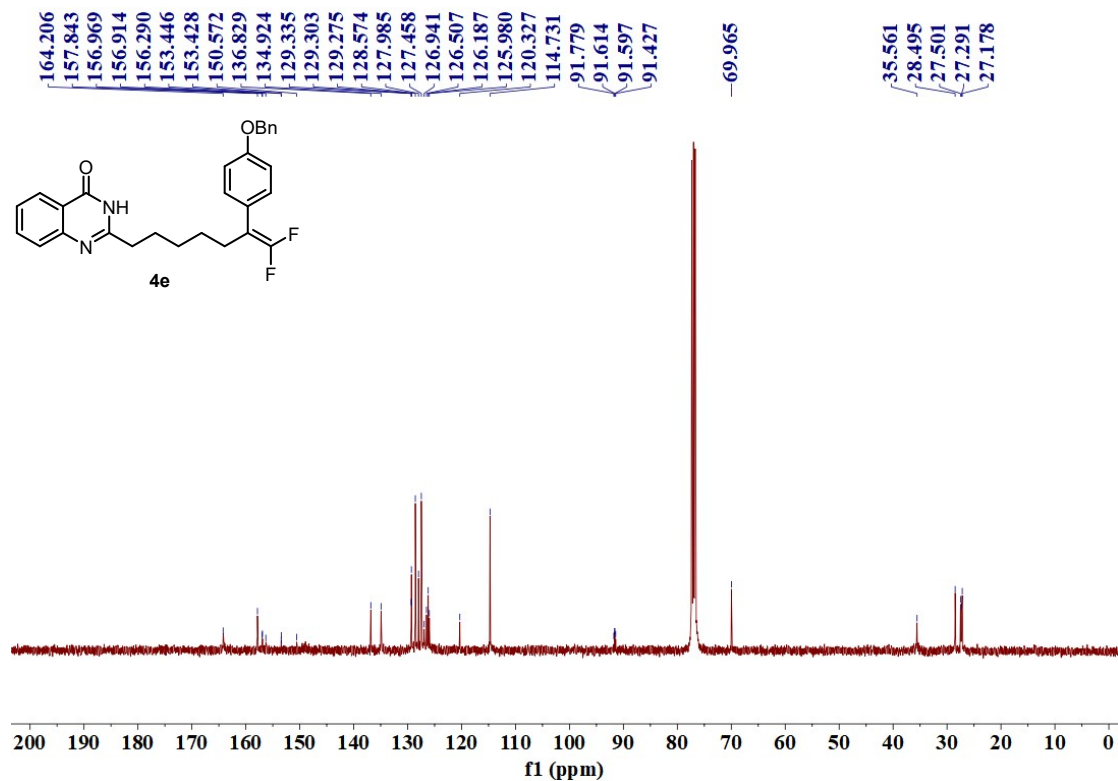

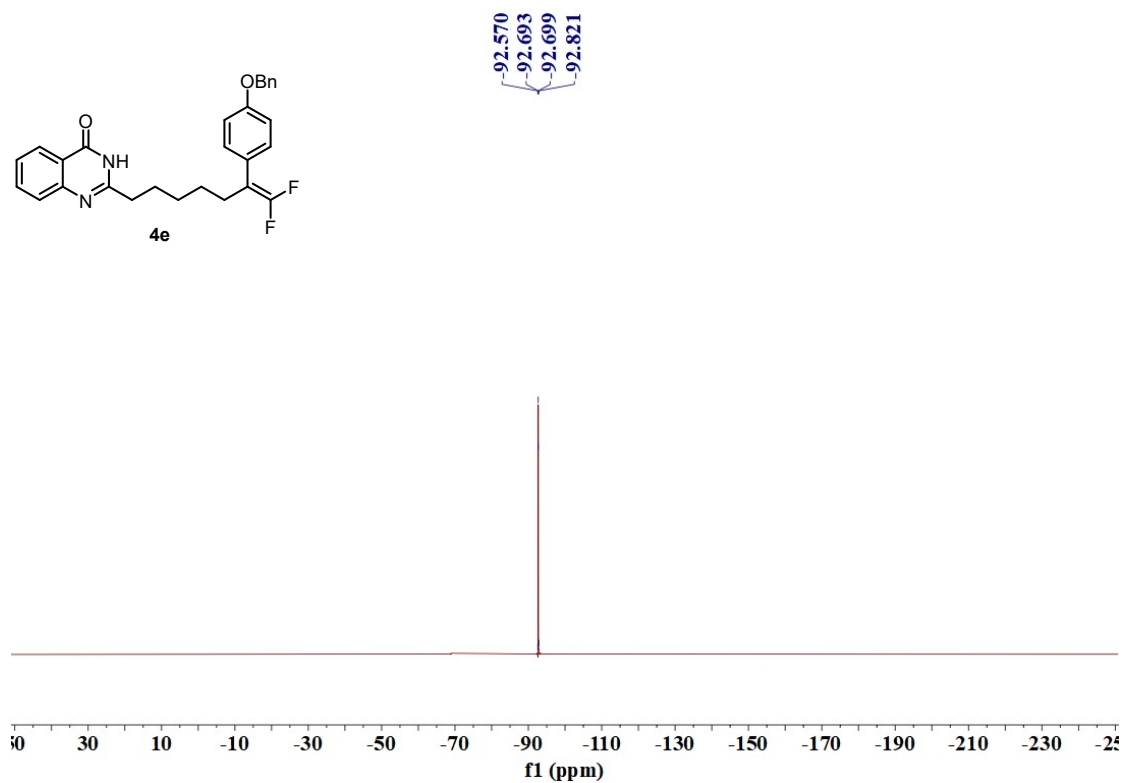

$^1\text{H}$  NMR,  $^{13}\text{C}$  NMR and  $^{19}\text{F}$  NMR spectra for product **4f** (Chloroform-*d*)

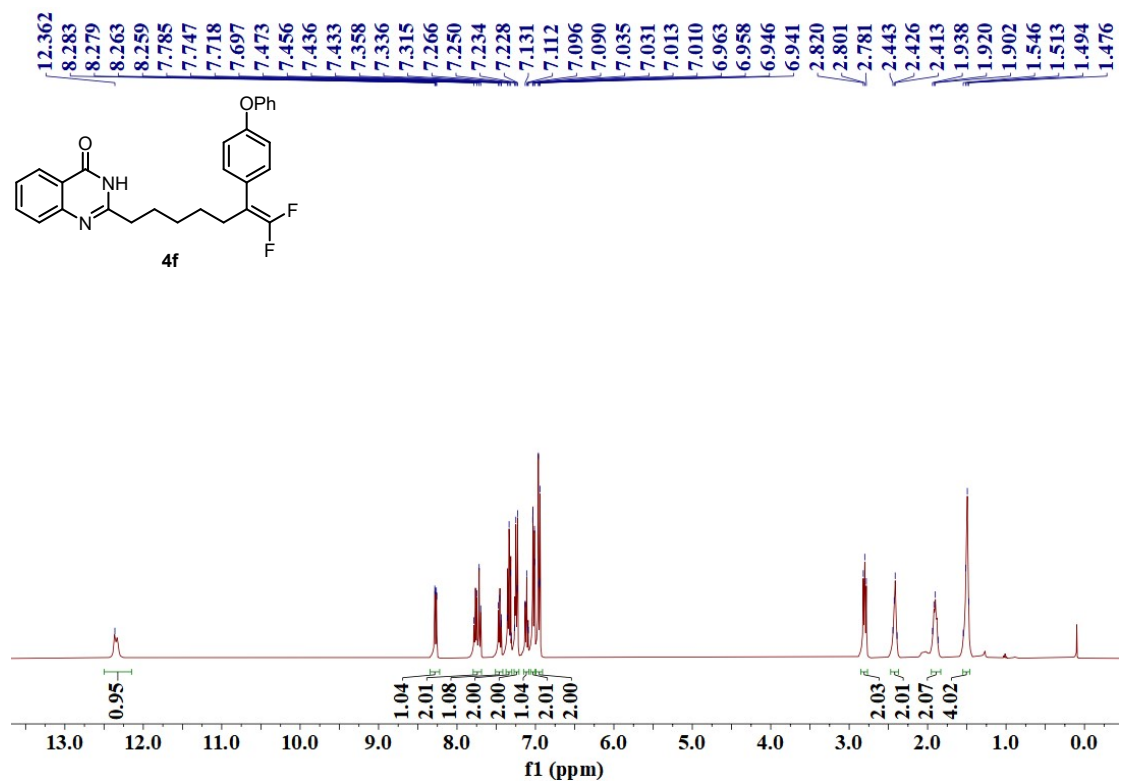

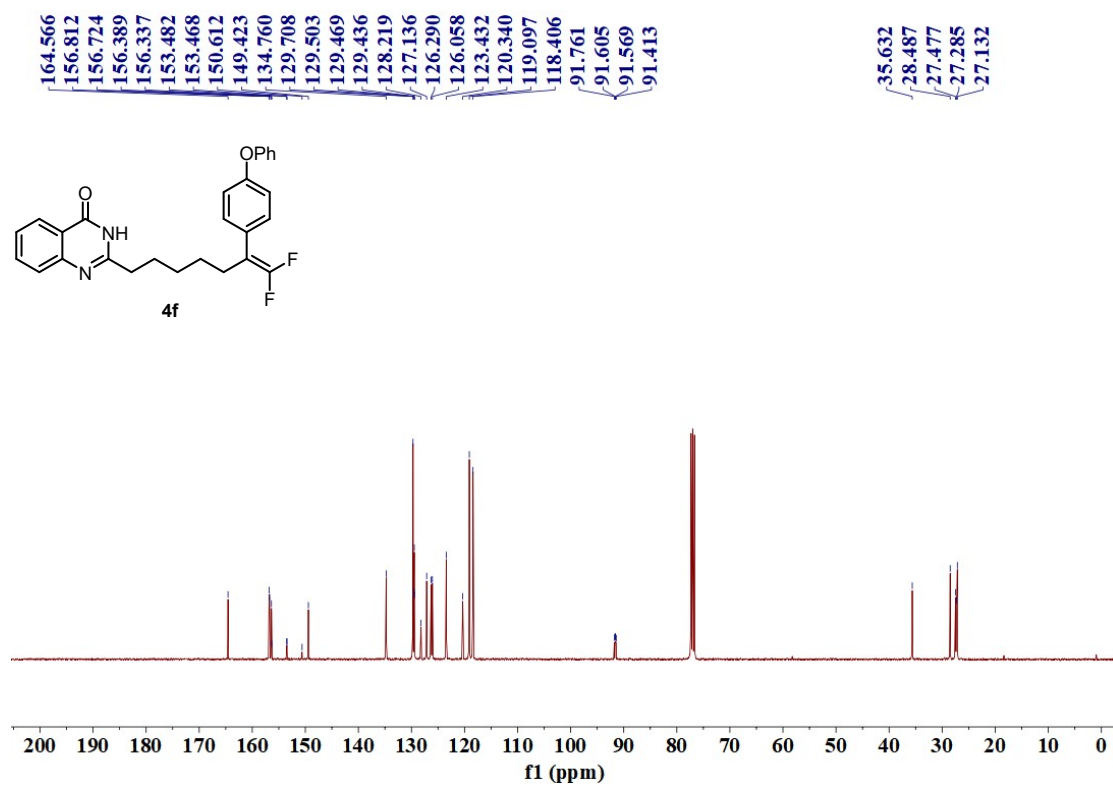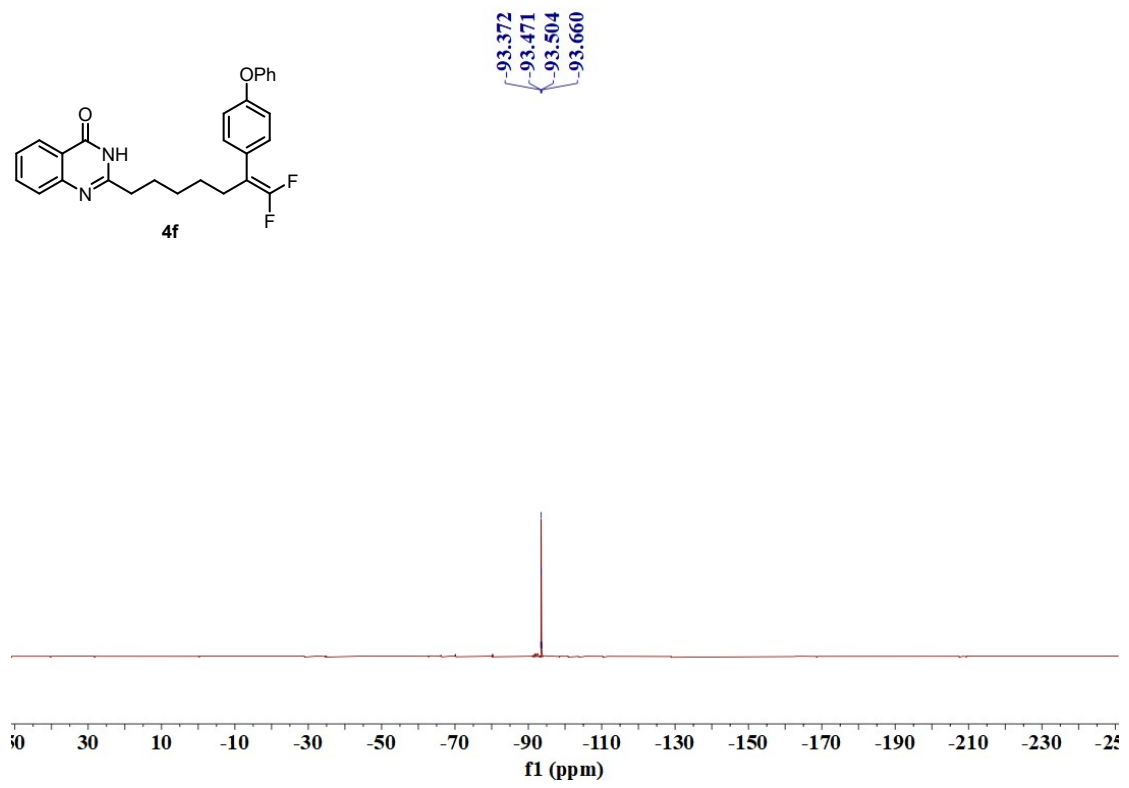

<sup>1</sup>H NMR, <sup>13</sup>C NMR and <sup>19</sup>F NMR spectra for product 4g (Chloroform-d)

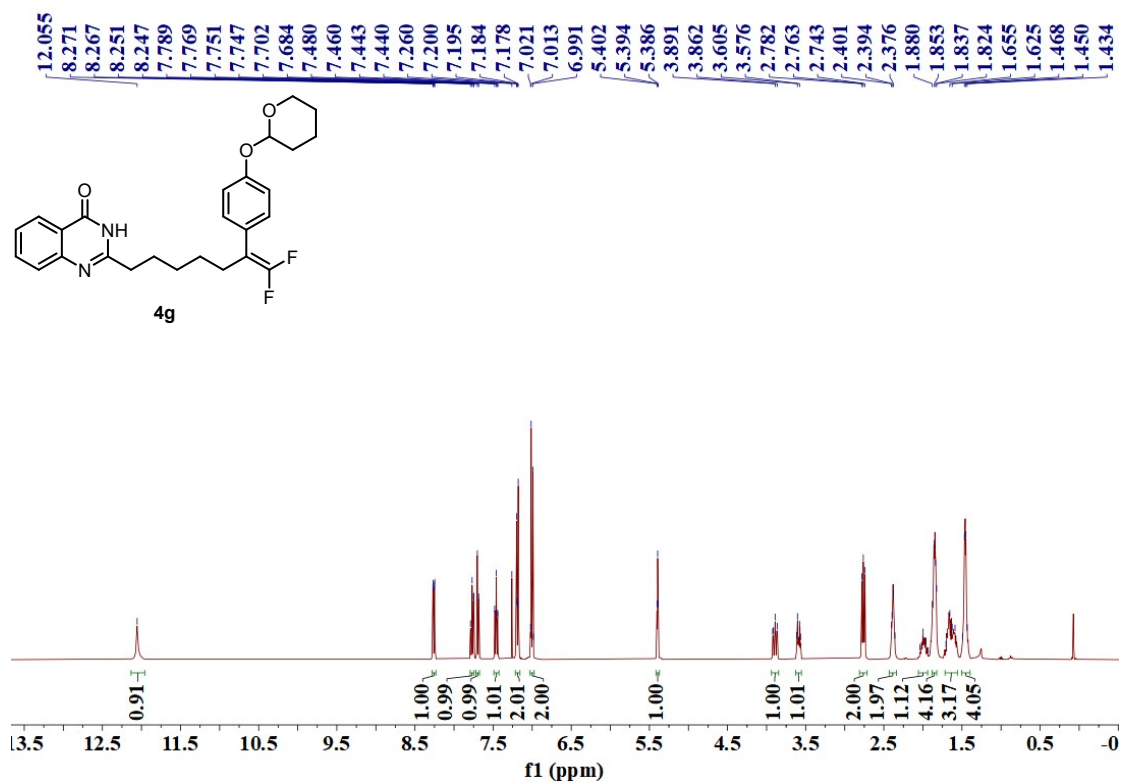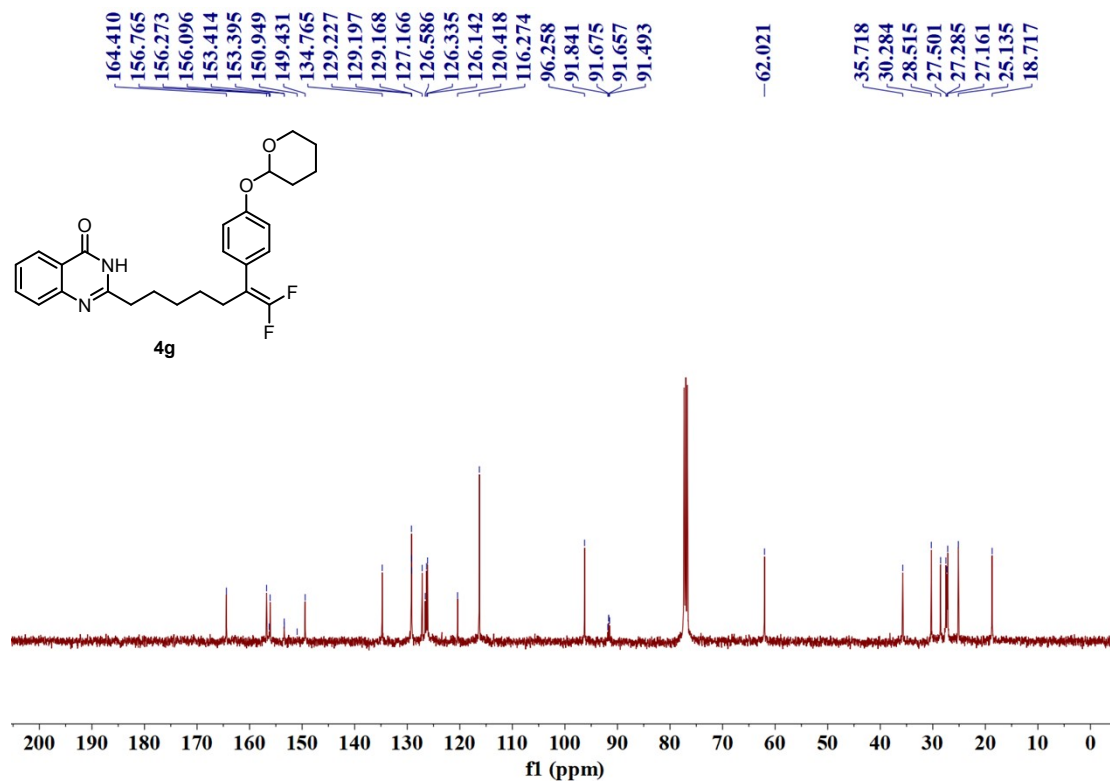

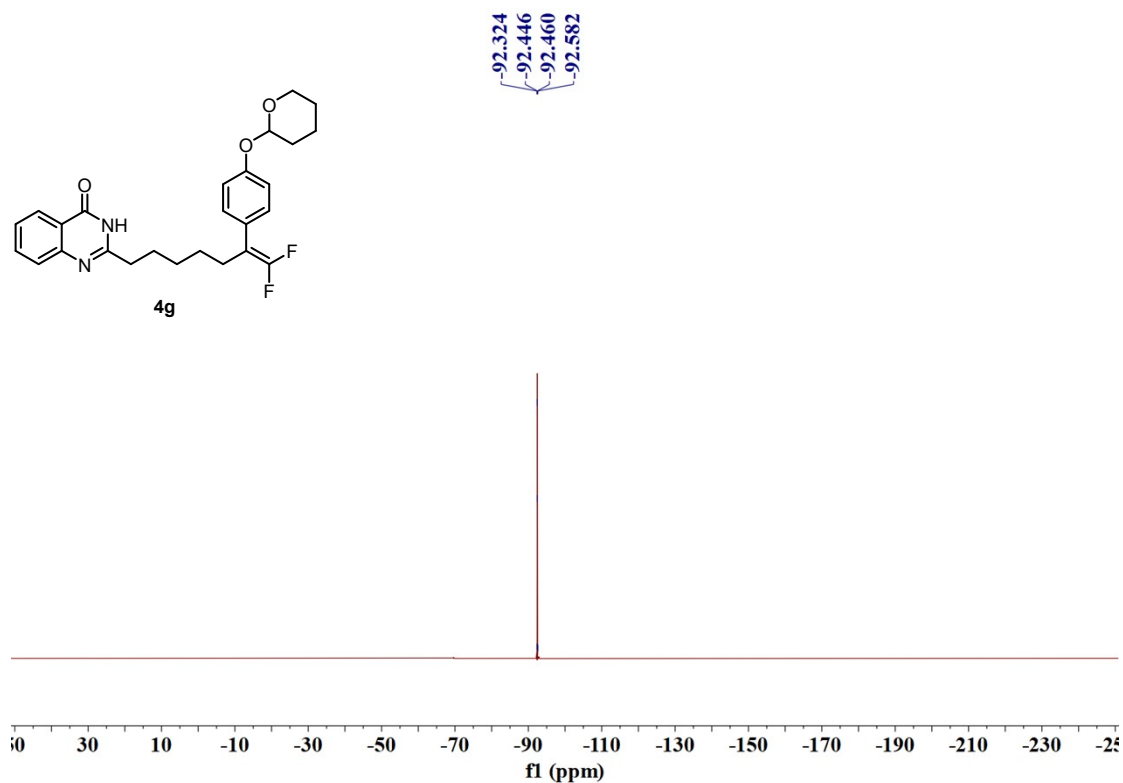

$^1\text{H}$  NMR,  $^{13}\text{C}$  NMR and  $^{19}\text{F}$  NMR spectra for product **4h** (Chloroform-*d*)

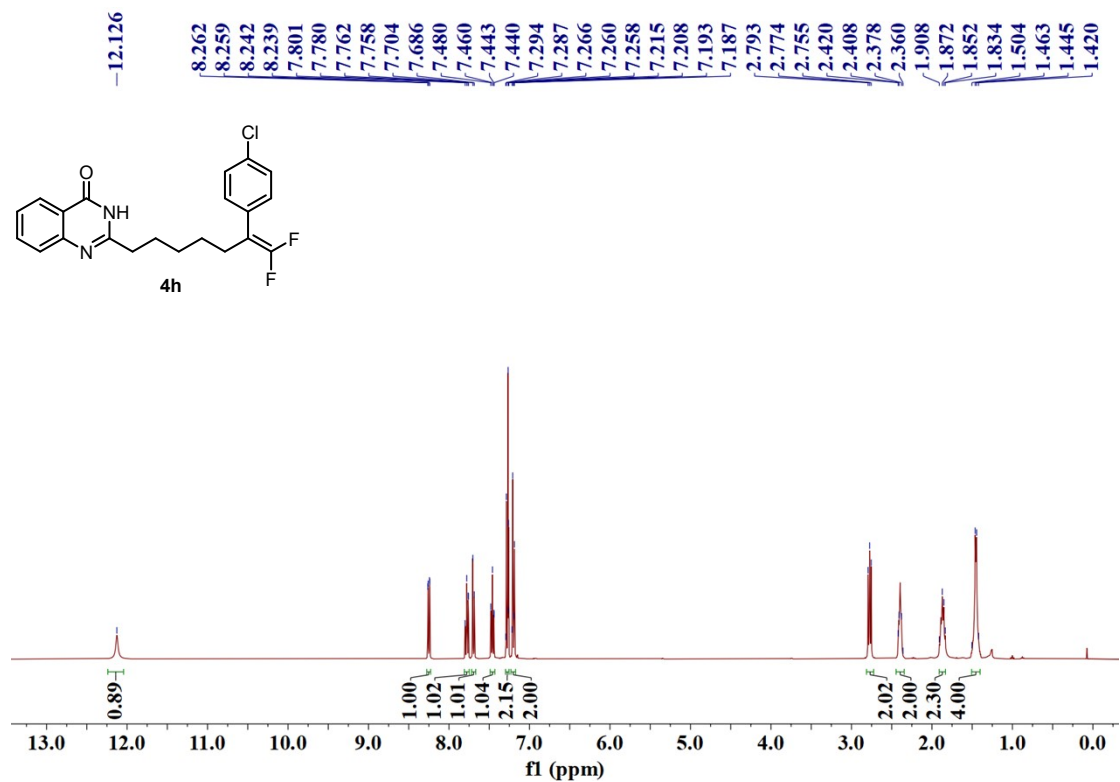

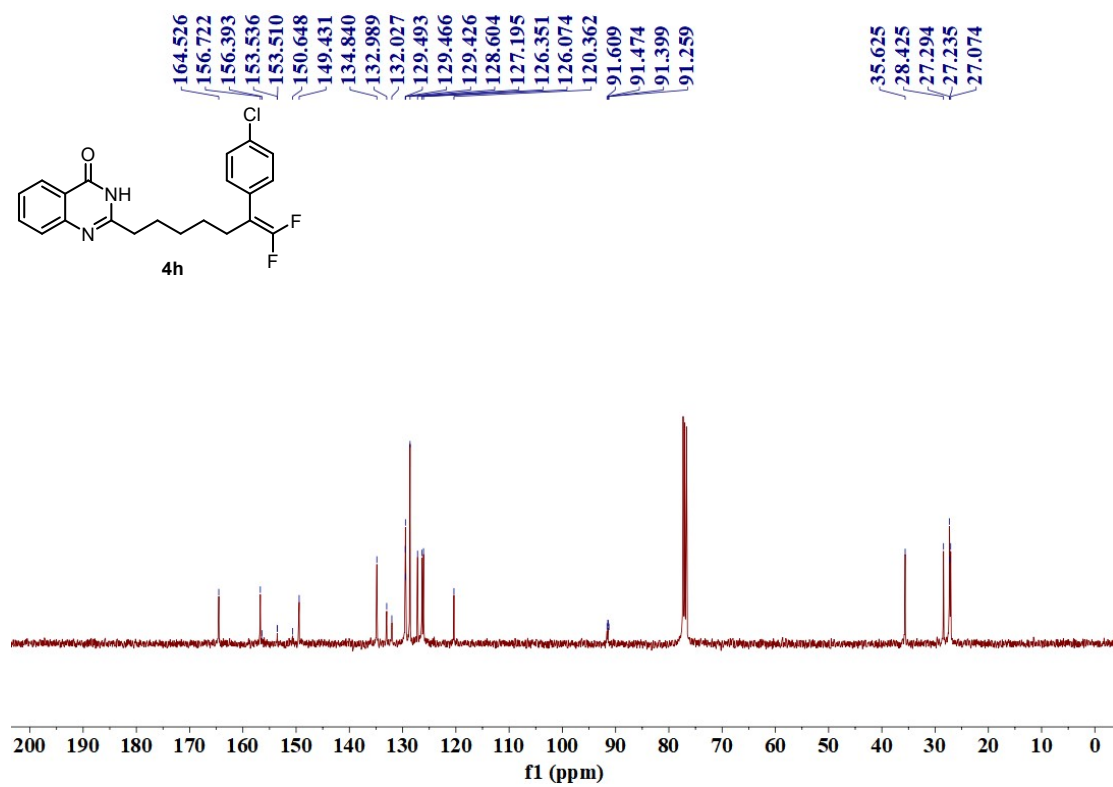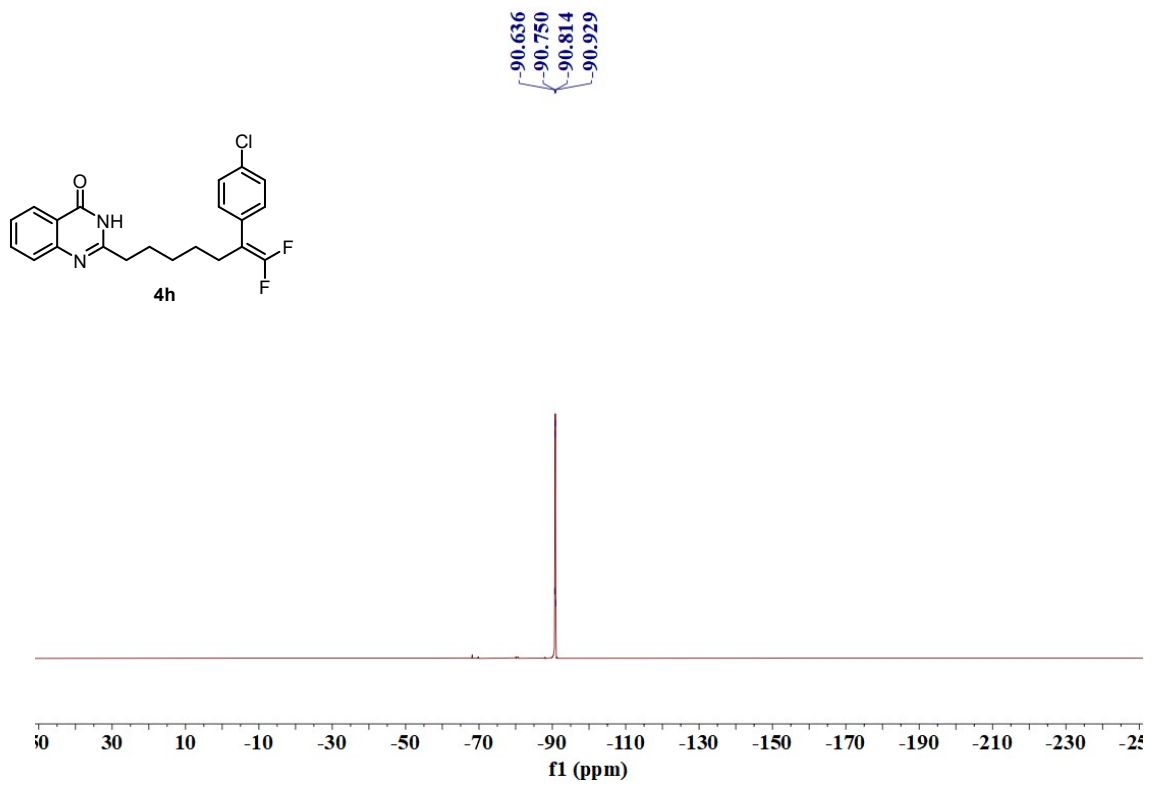

<sup>1</sup>H NMR, <sup>13</sup>C NMR and <sup>19</sup>F NMR spectra for product 4i (Chloroform-*d*)

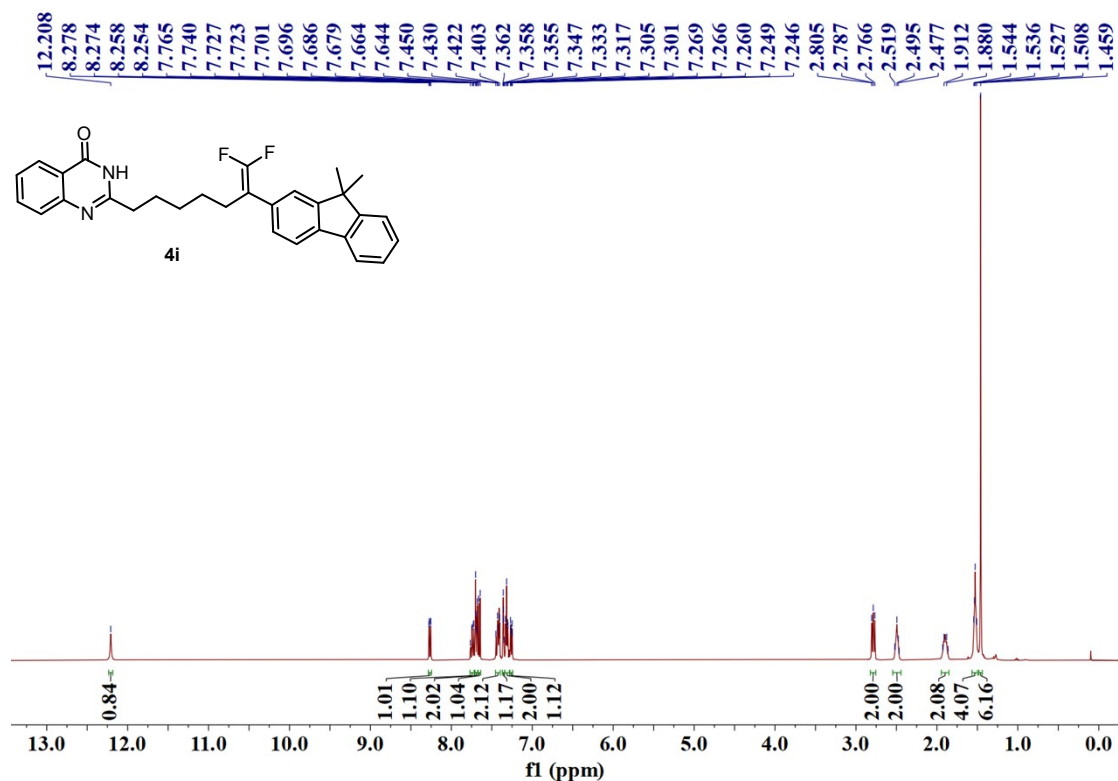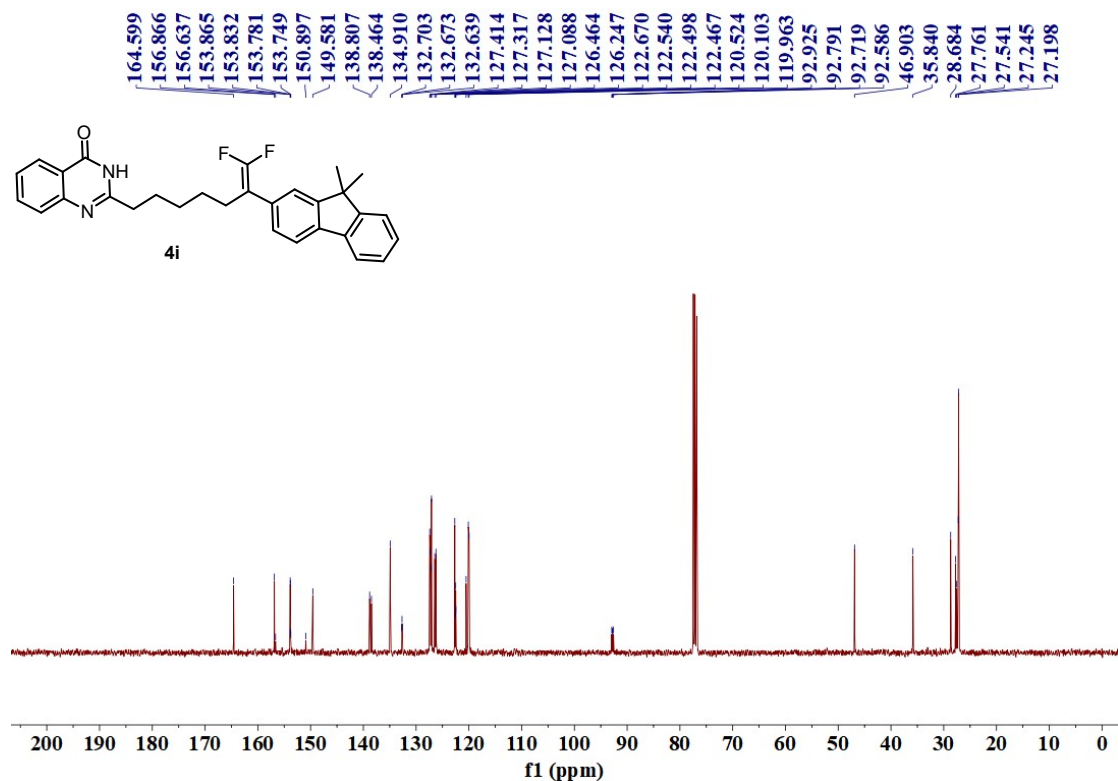

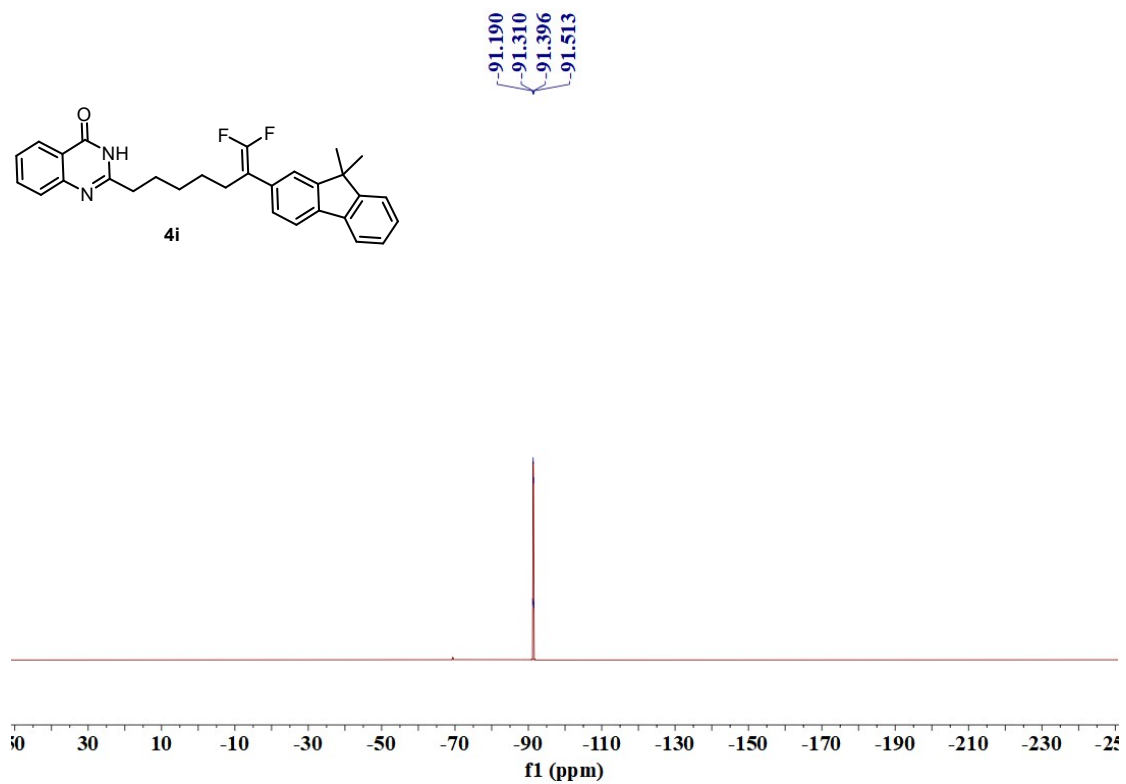

$^1\text{H}$  NMR,  $^{13}\text{C}$  NMR and  $^{19}\text{F}$  NMR spectra for product **4j** (DMSO- $d_6$ )

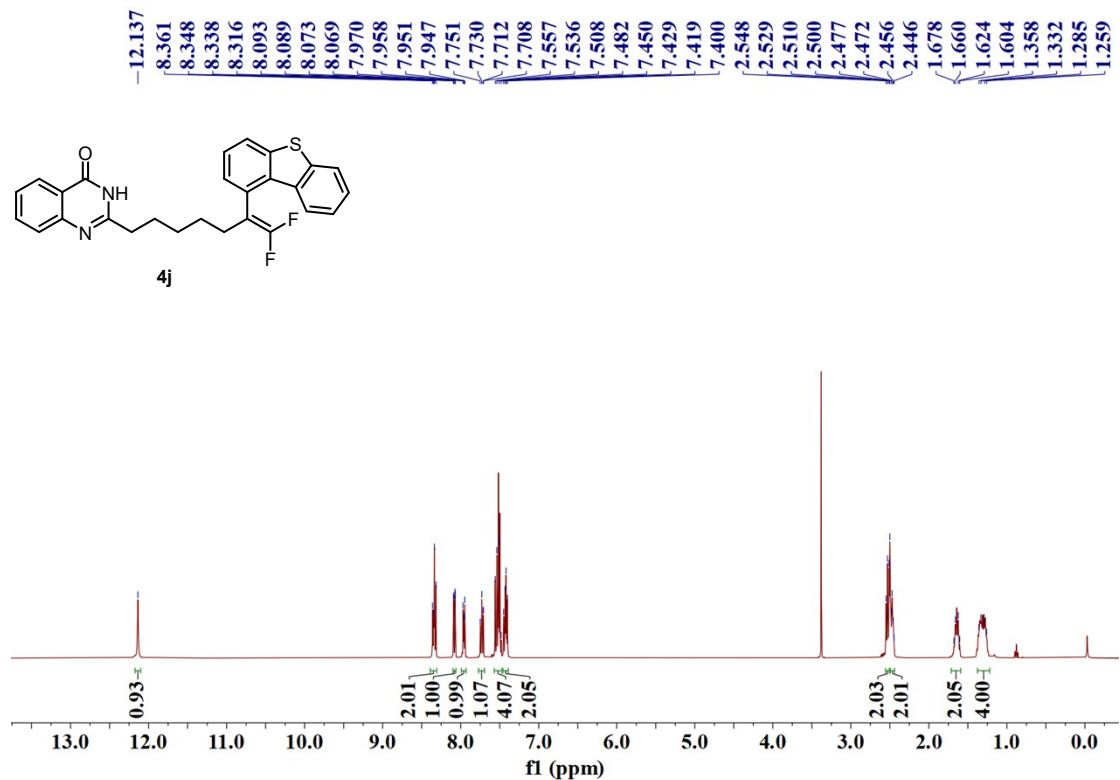



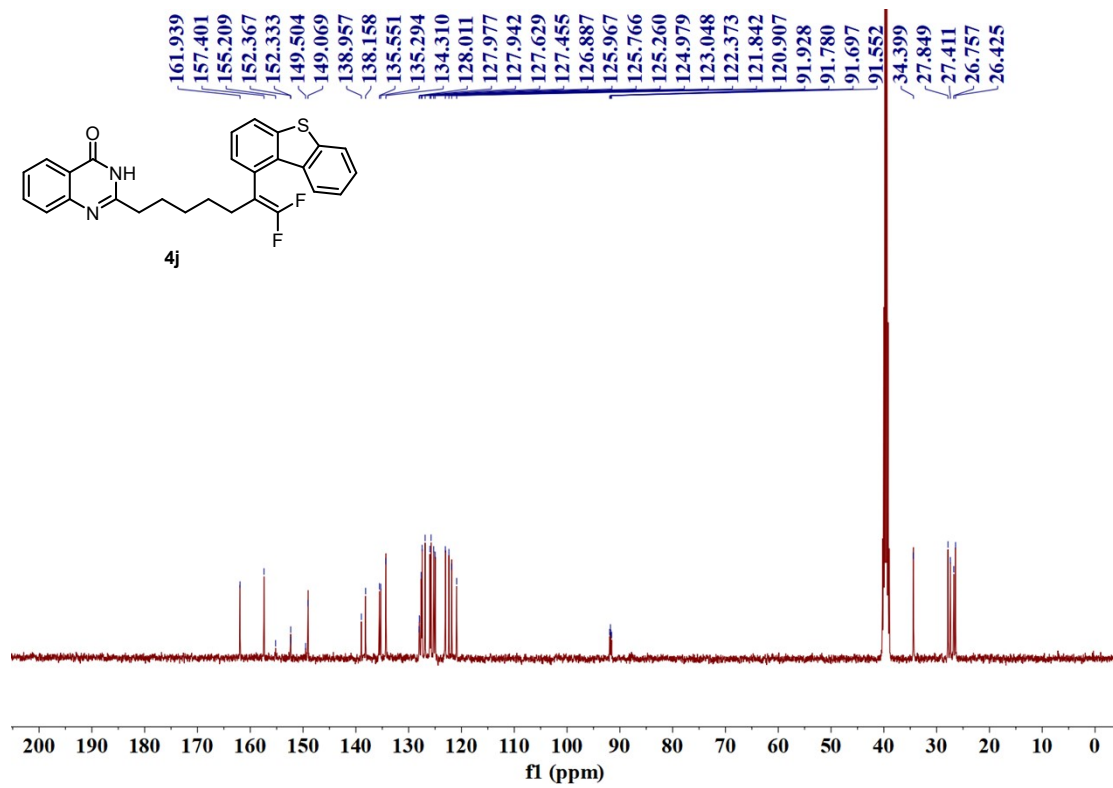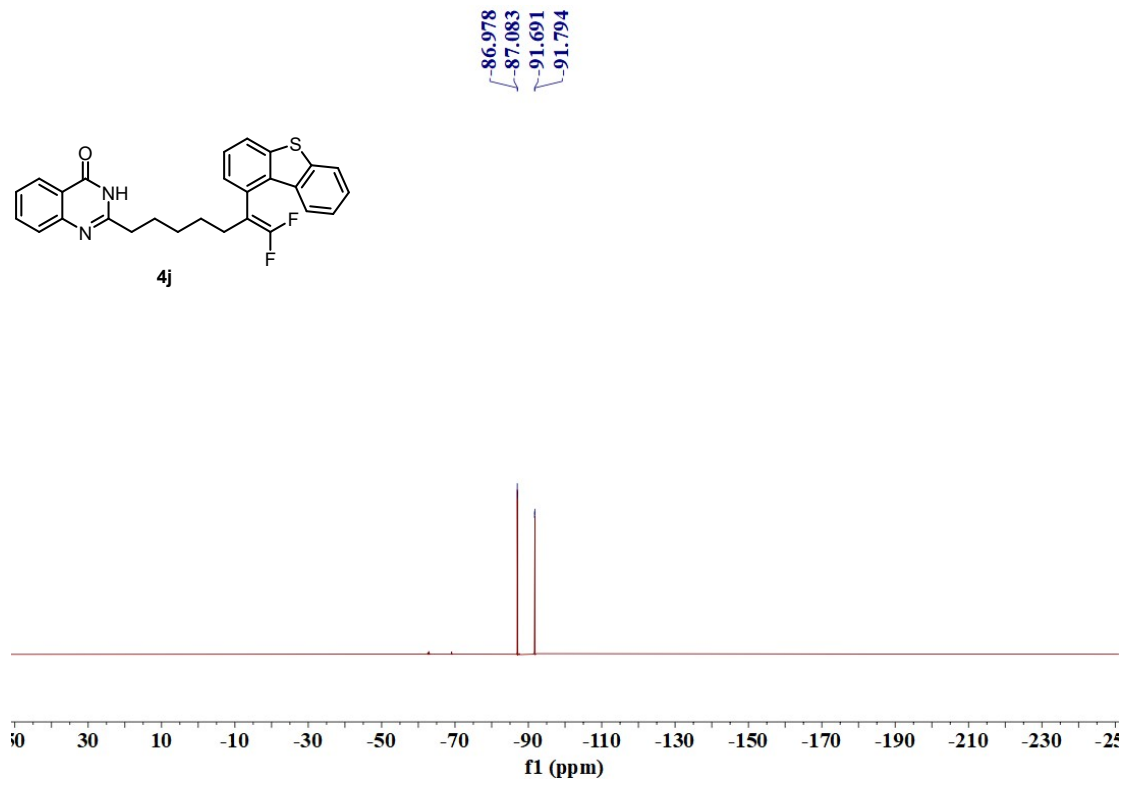

<sup>1</sup>H NMR, <sup>13</sup>C NMR and <sup>19</sup>F NMR spectra for product 4k (Chloroform-*d*)

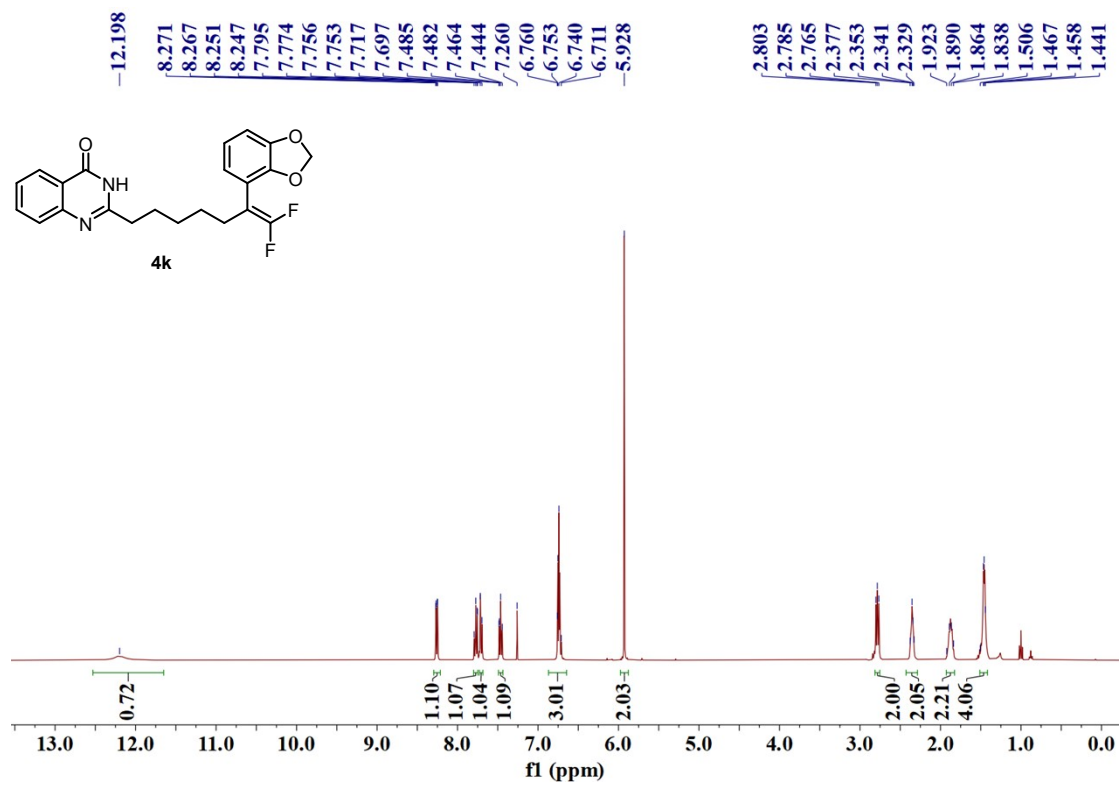

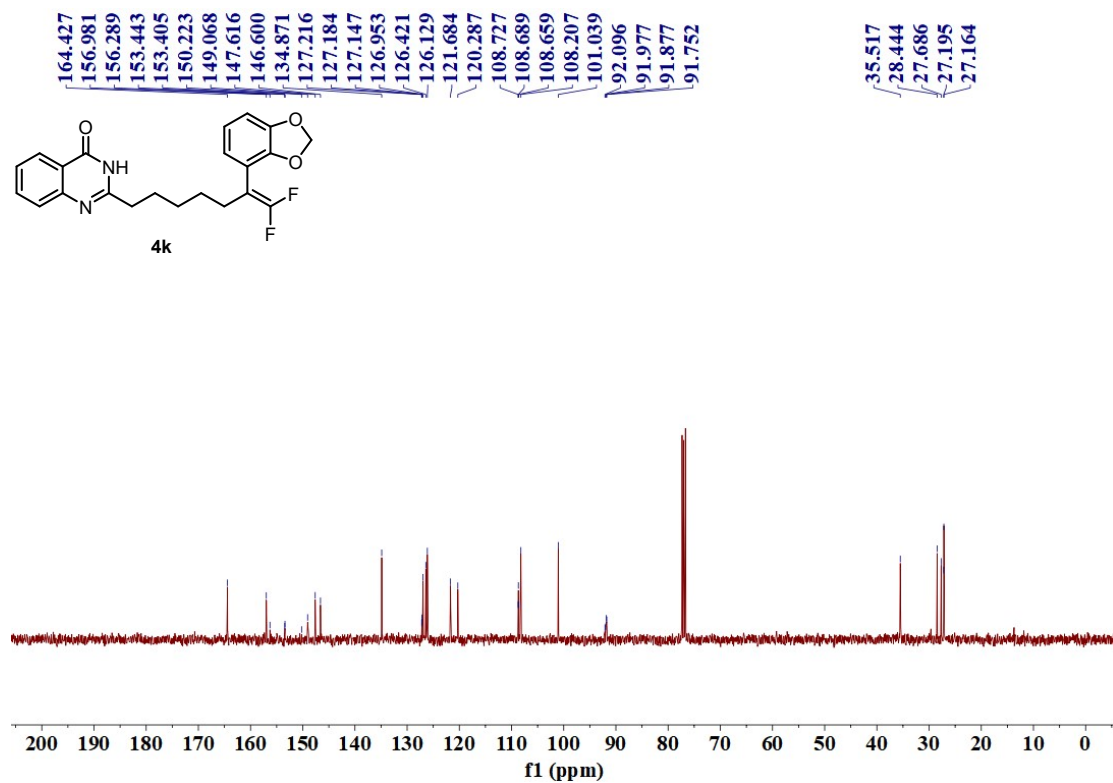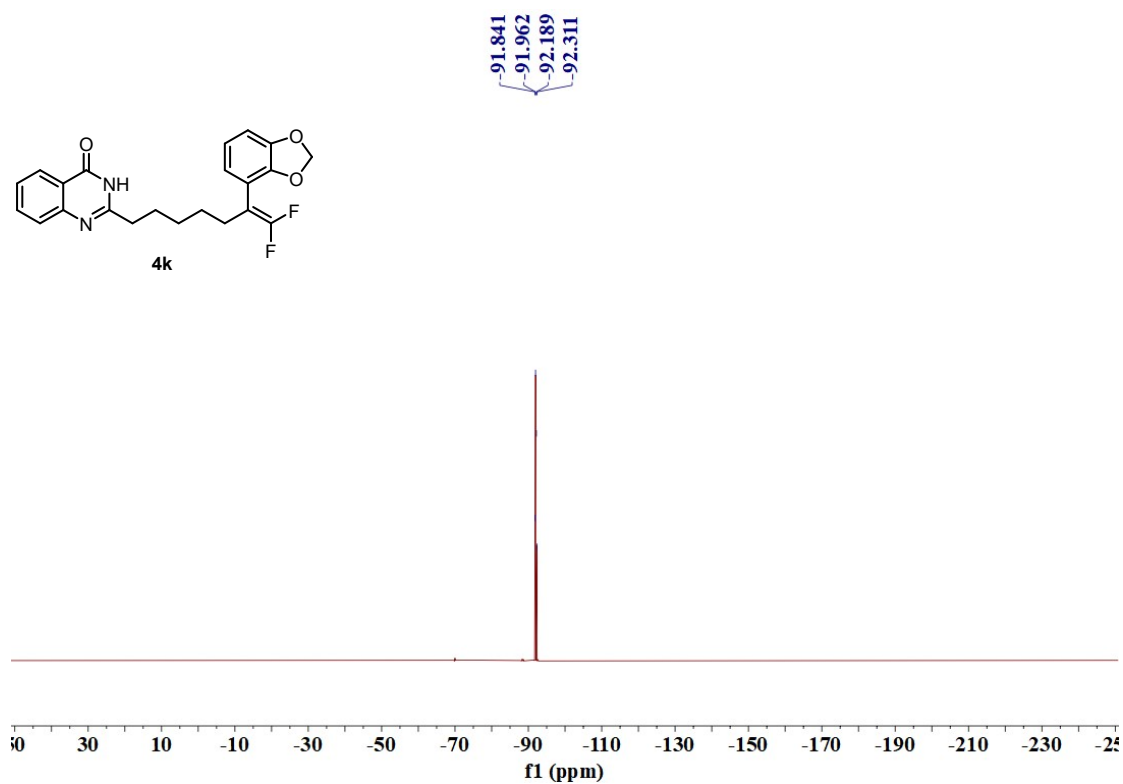

$^1\text{H}$  NMR,  $^{13}\text{C}$  NMR and  $^{19}\text{F}$  NMR spectra for product 4l (Chloroform-*d*)

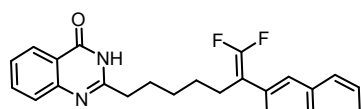

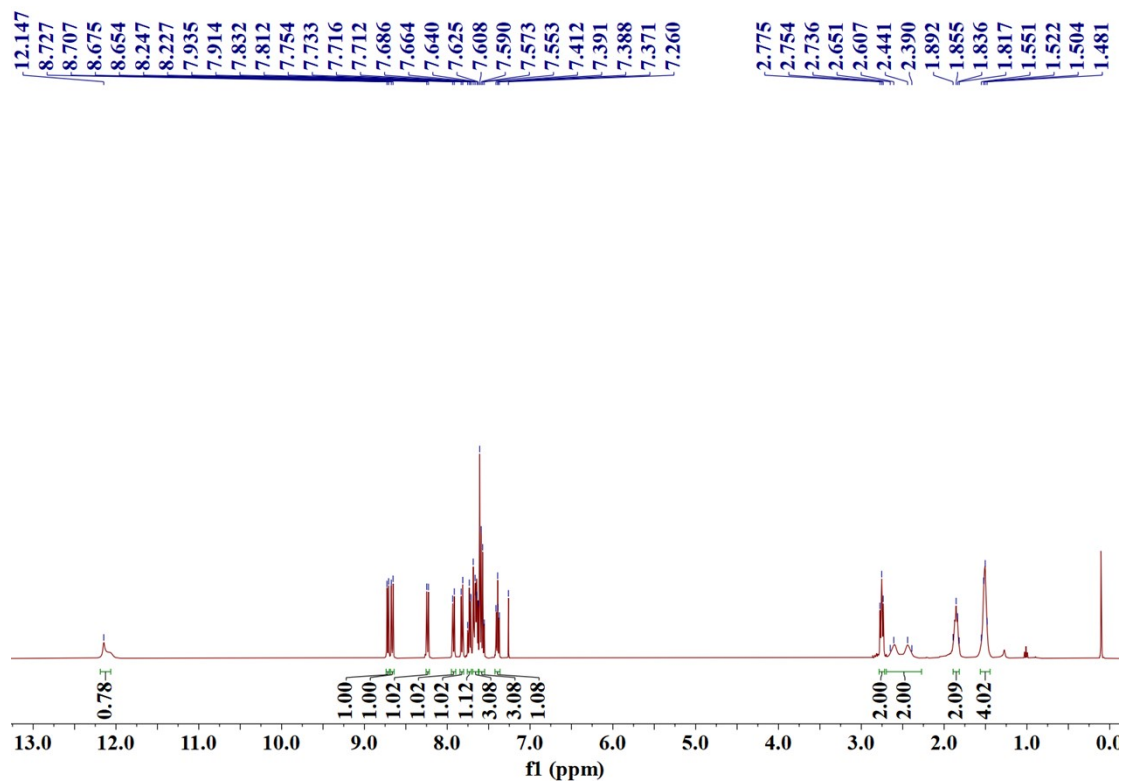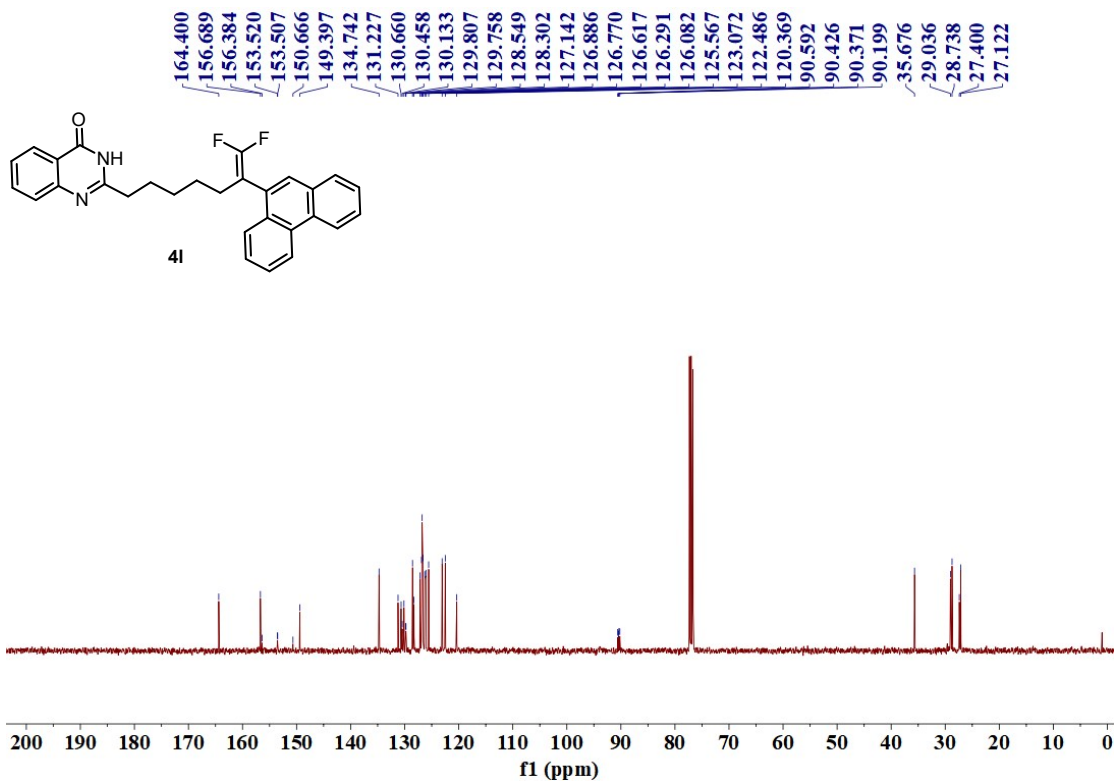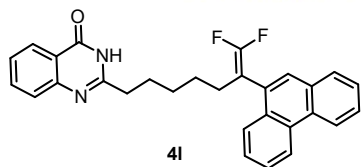

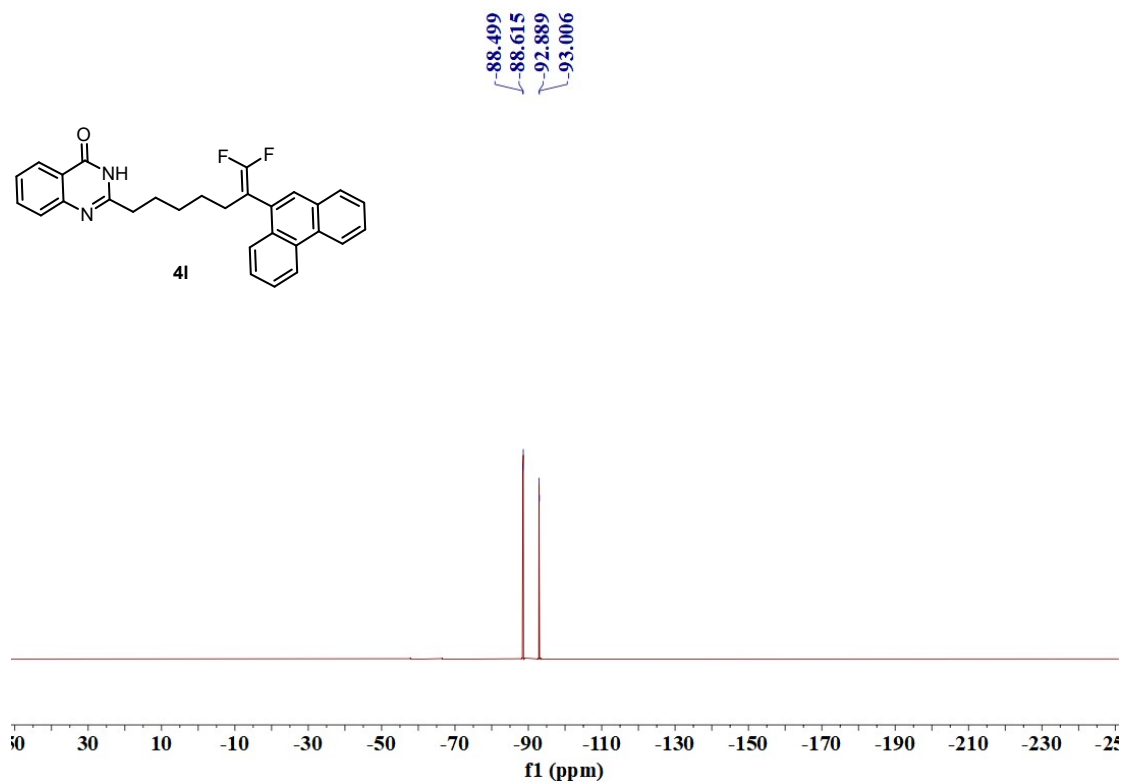

**<sup>1</sup>H NMR, <sup>13</sup>C NMR and <sup>19</sup>F NMR spectra for product 4m (Chloroform-*d*)**

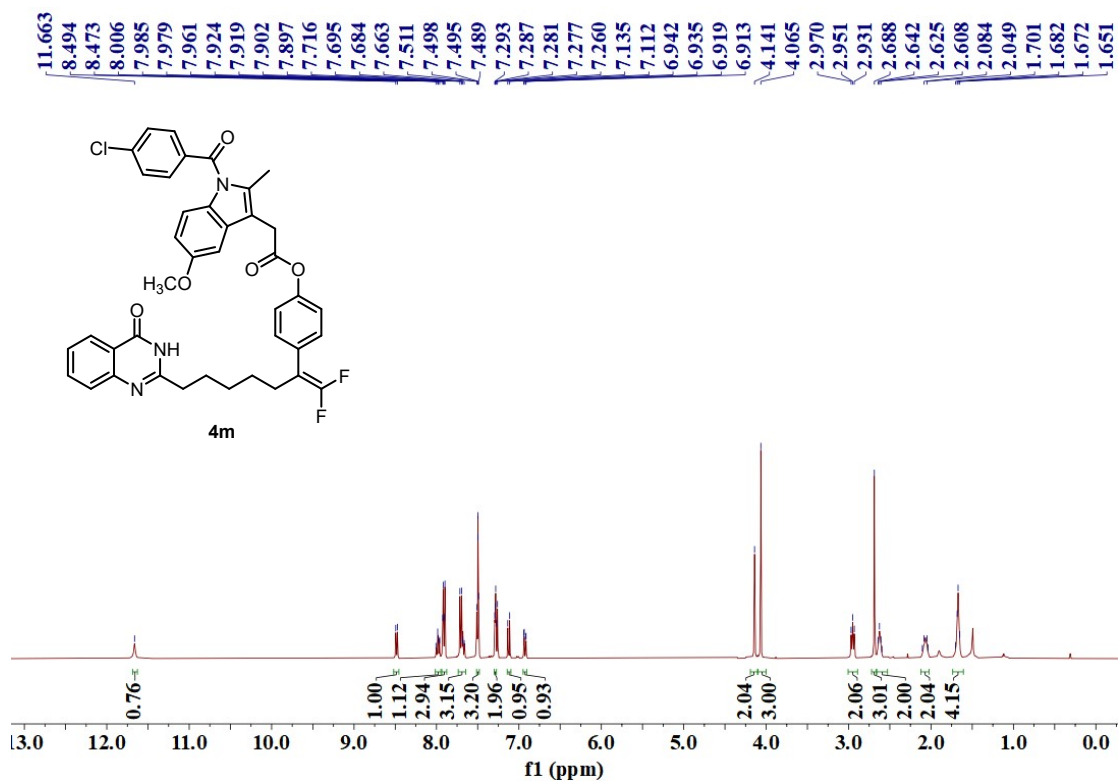

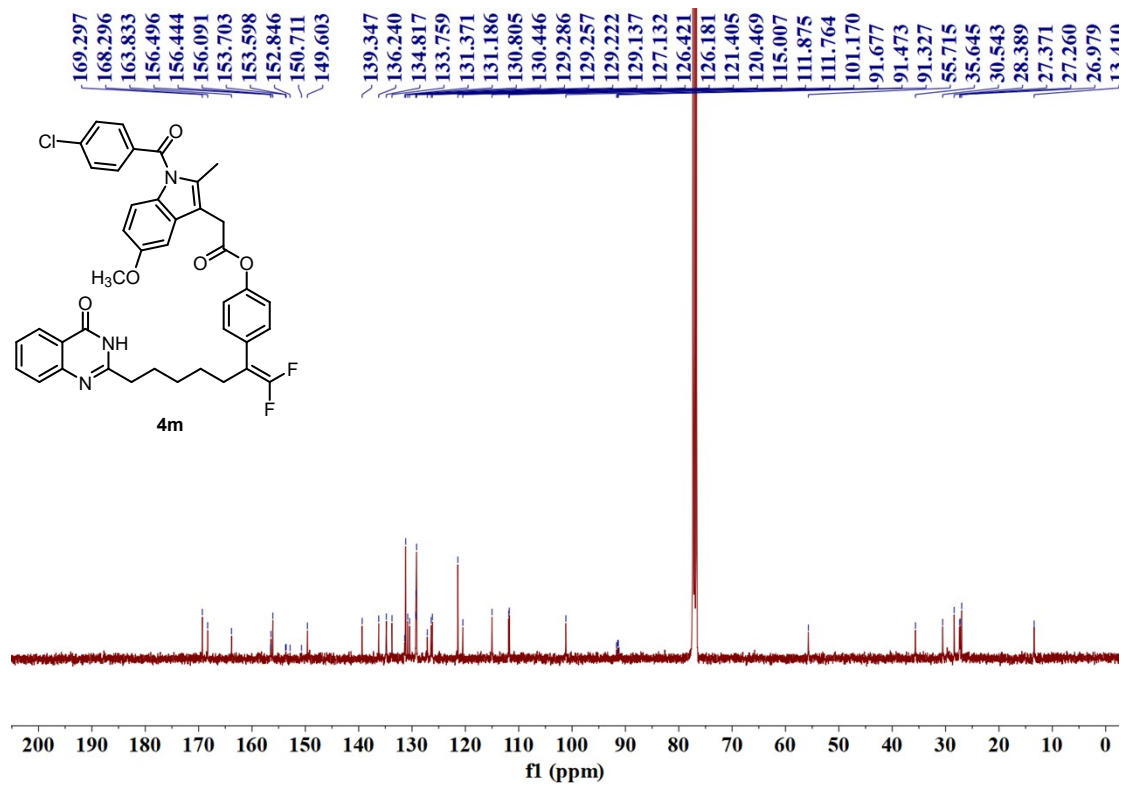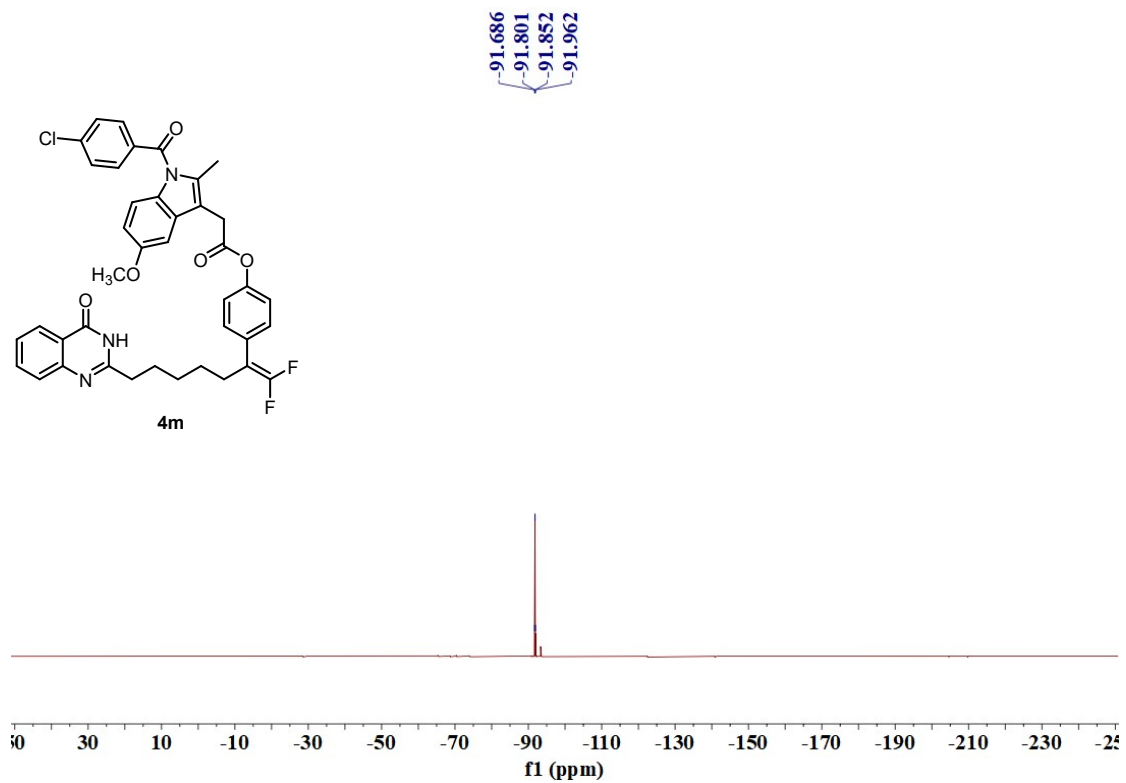

**<sup>1</sup>H NMR, <sup>13</sup>C NMR and <sup>19</sup>F NMR spectra for product 4n (Chloroform-*d*)**

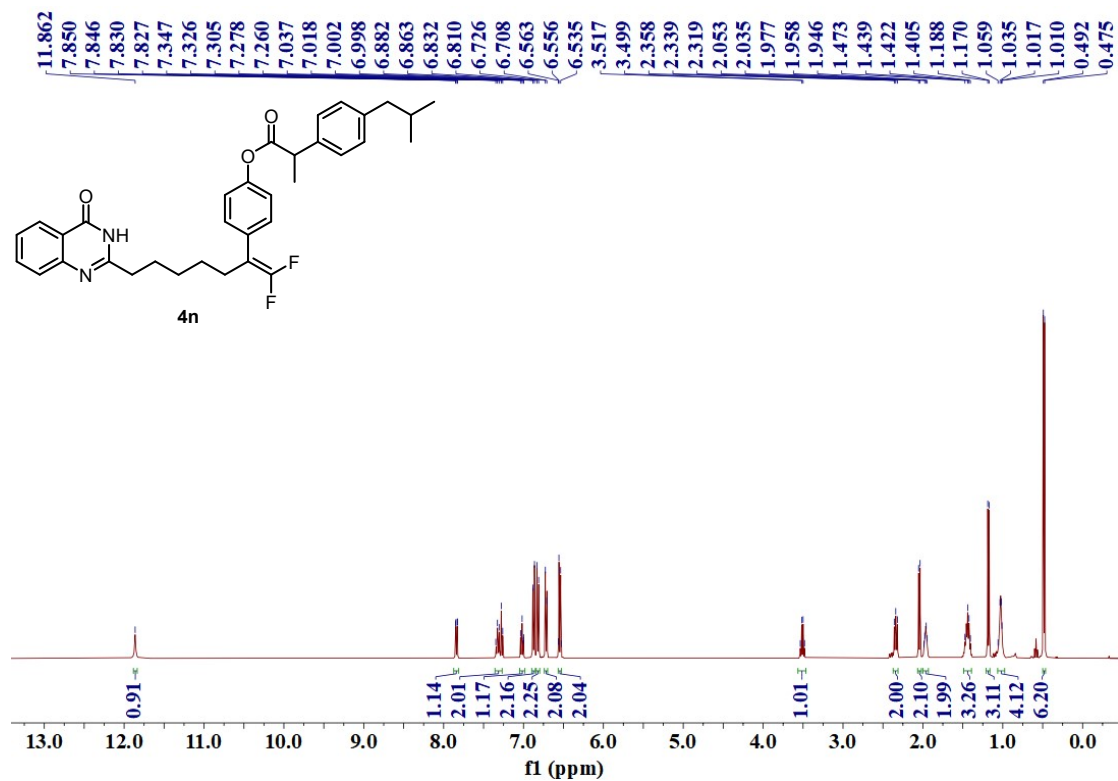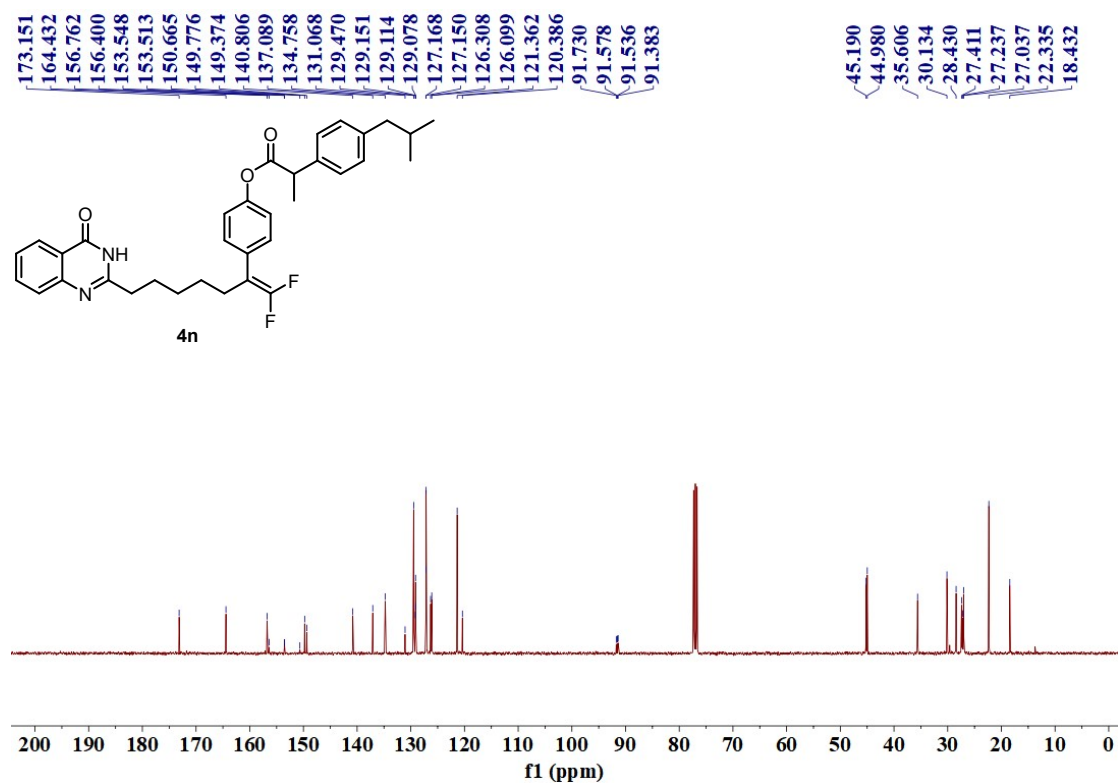

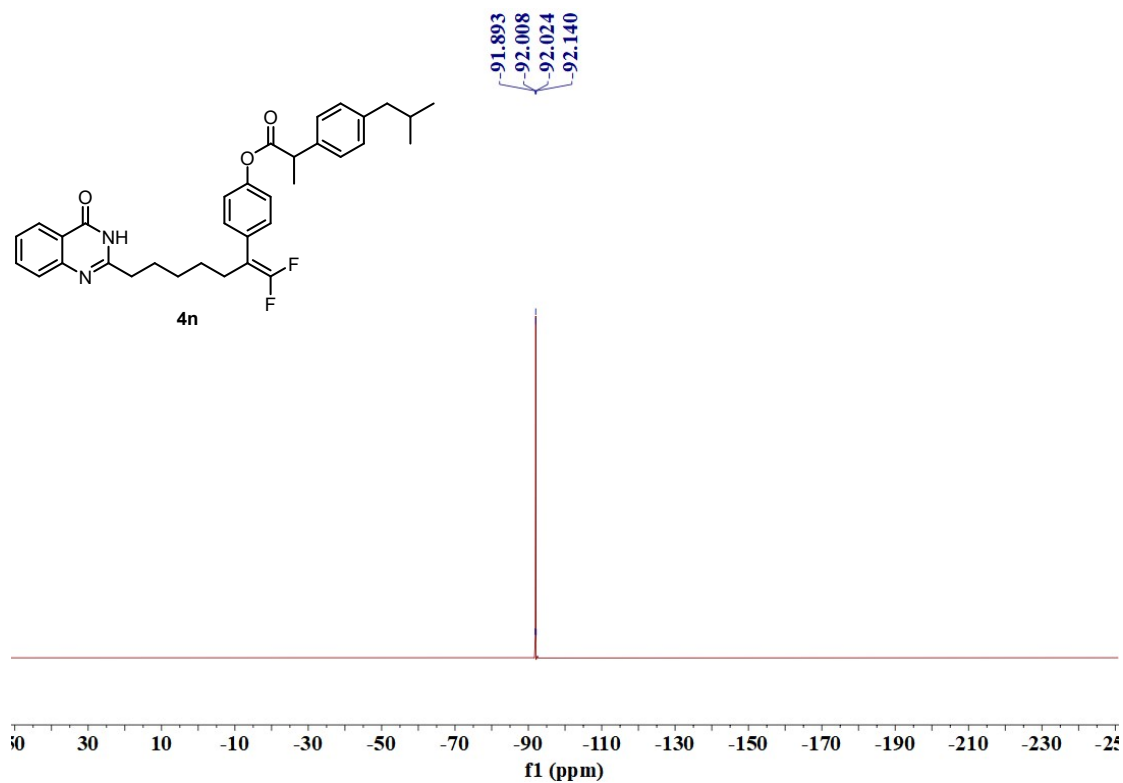

**$^1\text{H}$  NMR,  $^{13}\text{C}$  NMR and  $^{19}\text{F}$  NMR spectra for product 5a (Chloroform-*d*)**

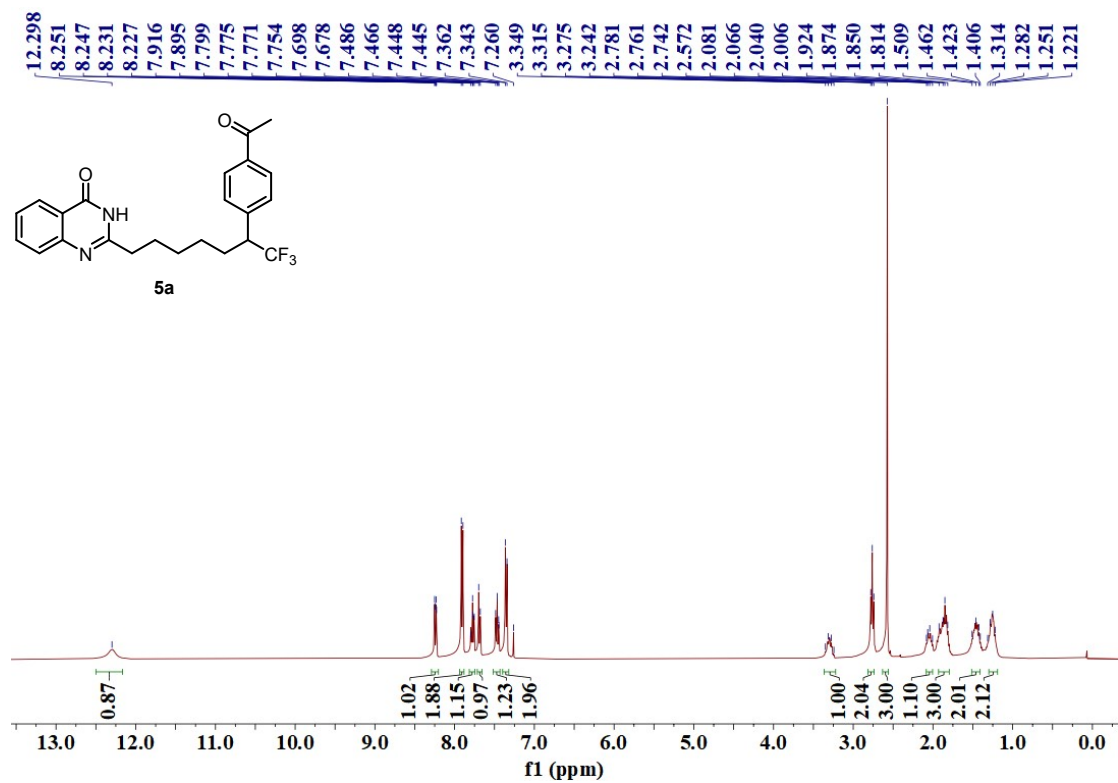



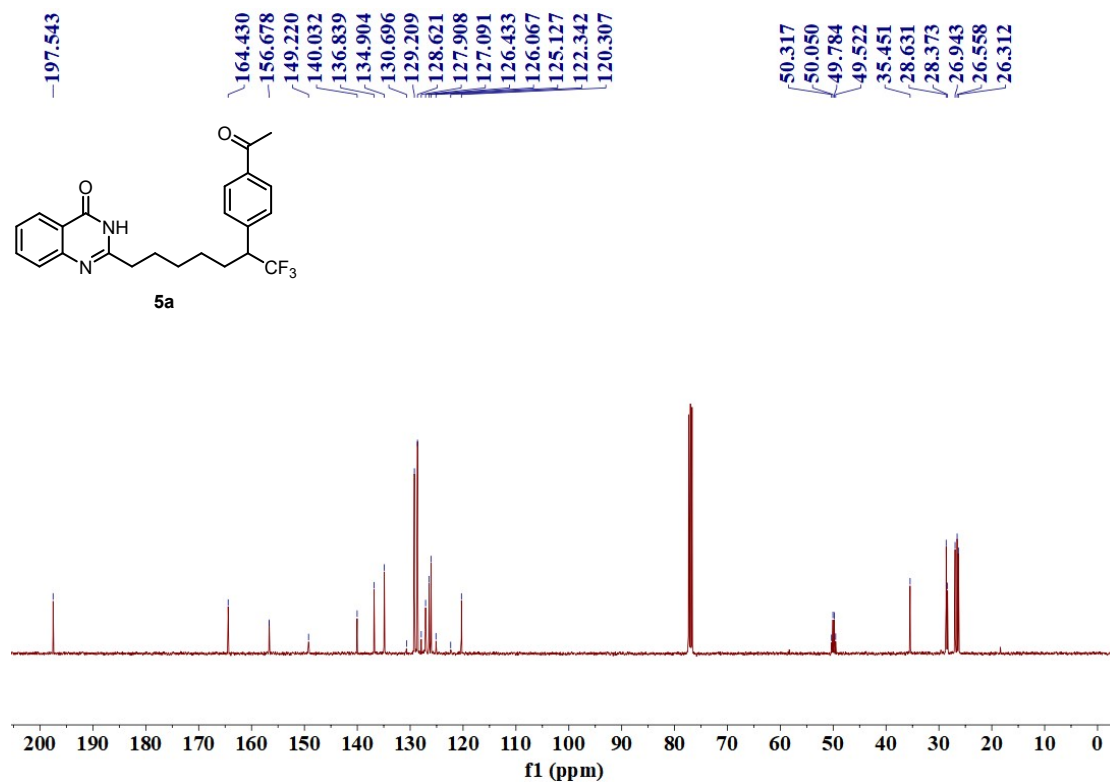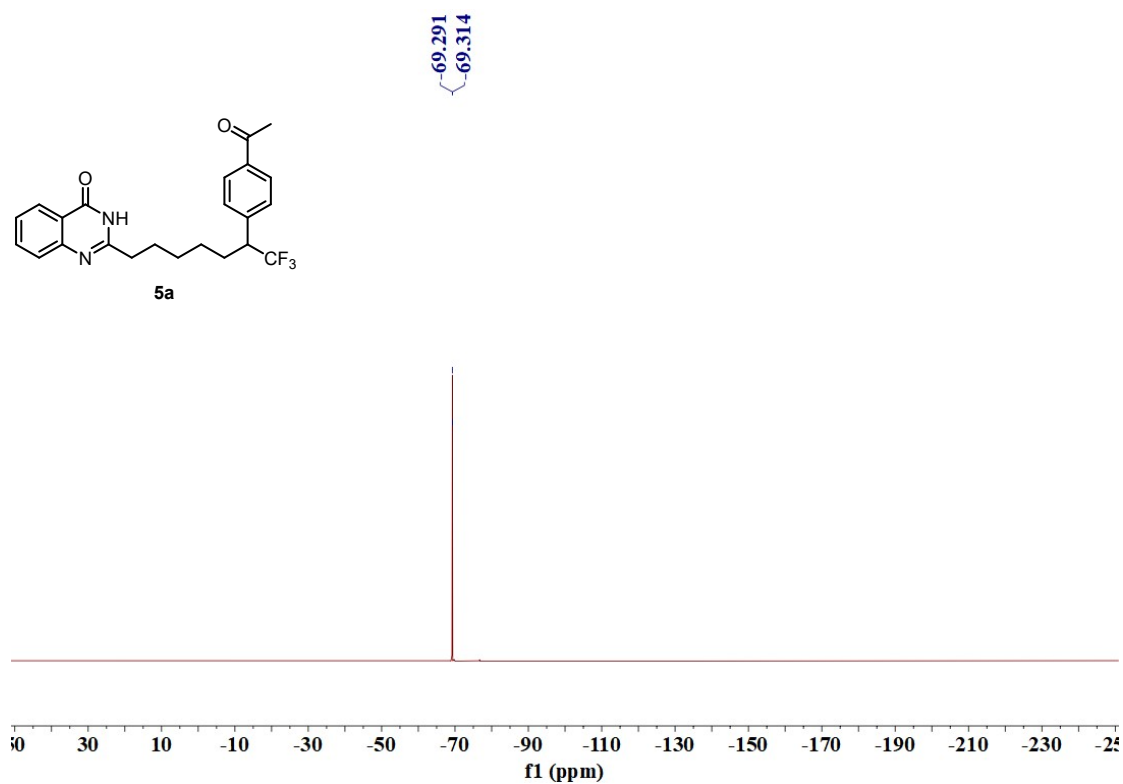

**<sup>1</sup>H NMR, <sup>13</sup>C NMR and <sup>19</sup>F NMR spectra for product 5b (Chloroform-*d*)**

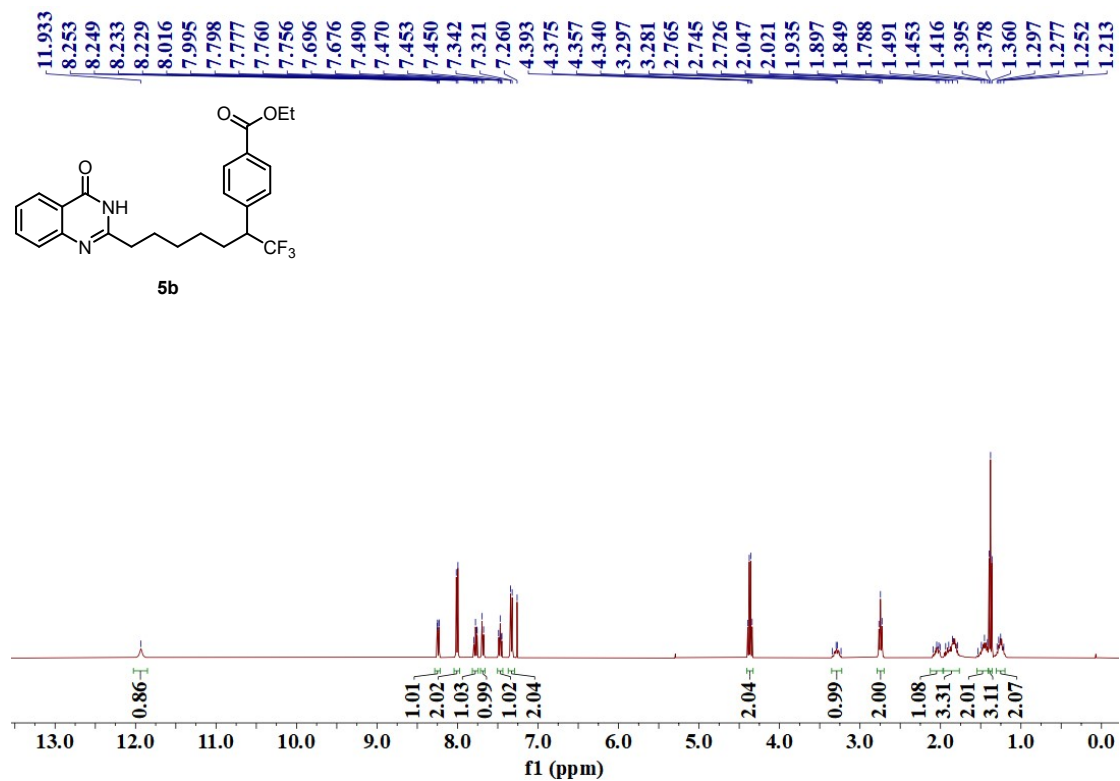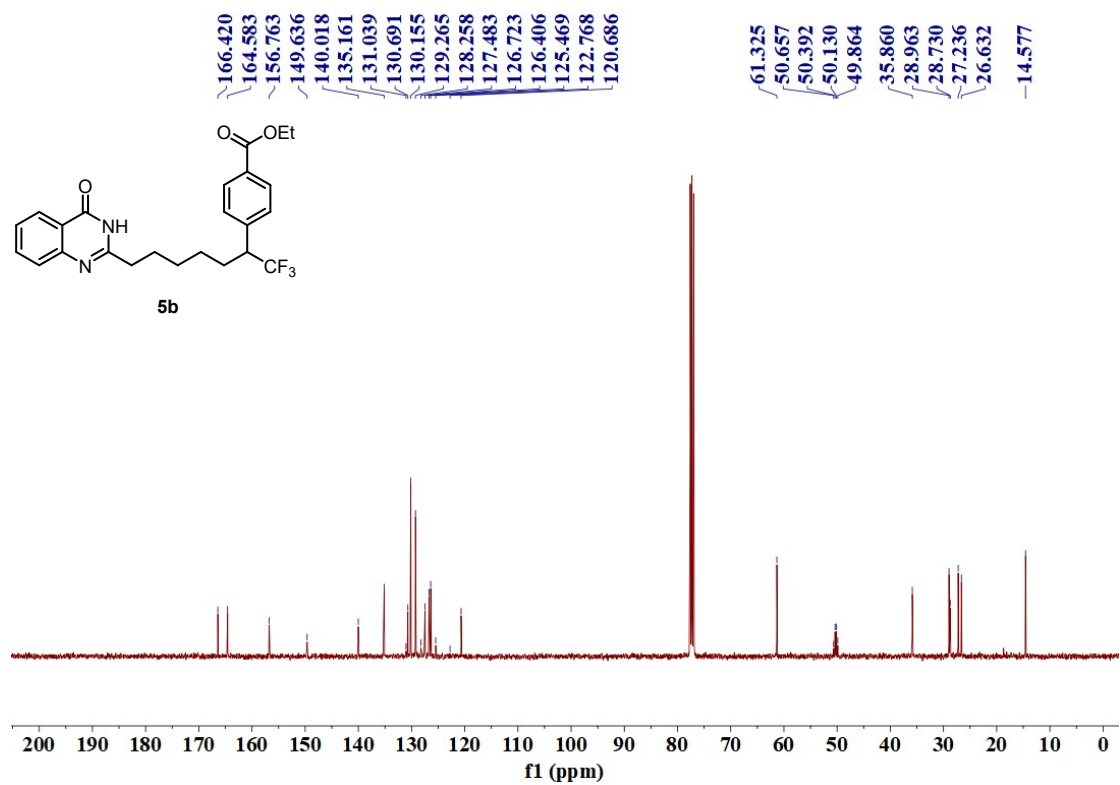

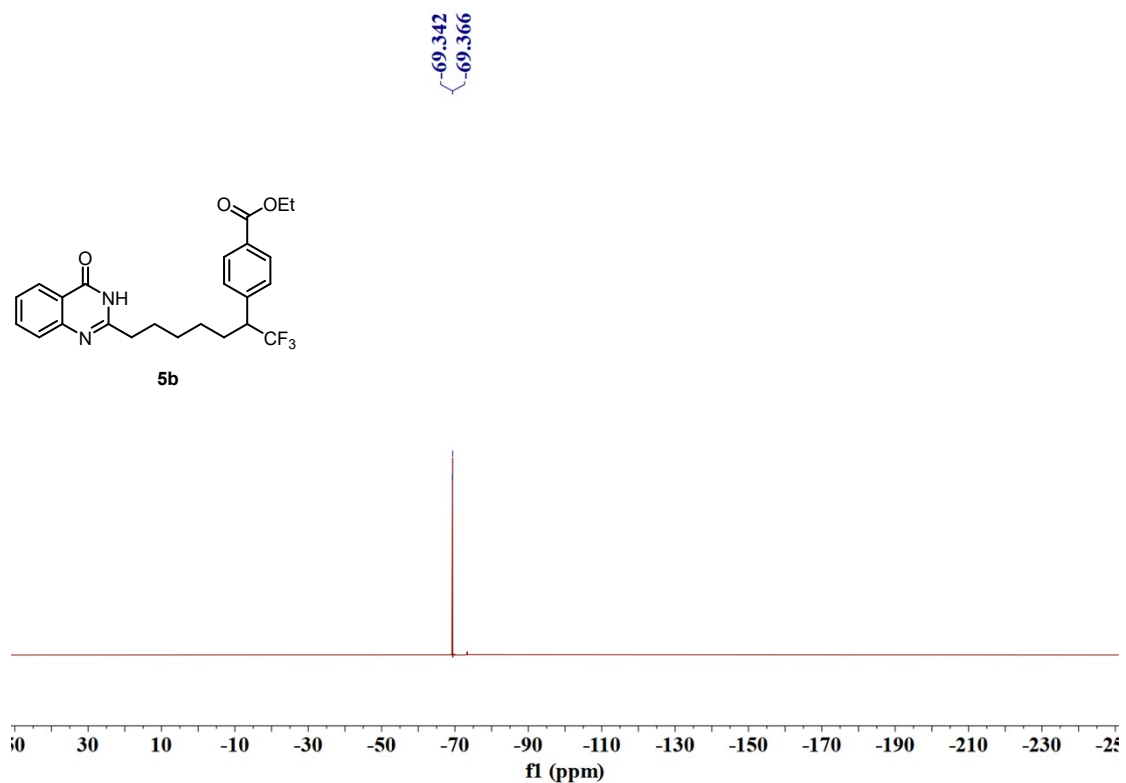

**<sup>1</sup>H NMR, <sup>13</sup>C NMR and <sup>19</sup>F NMR spectra for product 5c (Chloroform-*d*)**

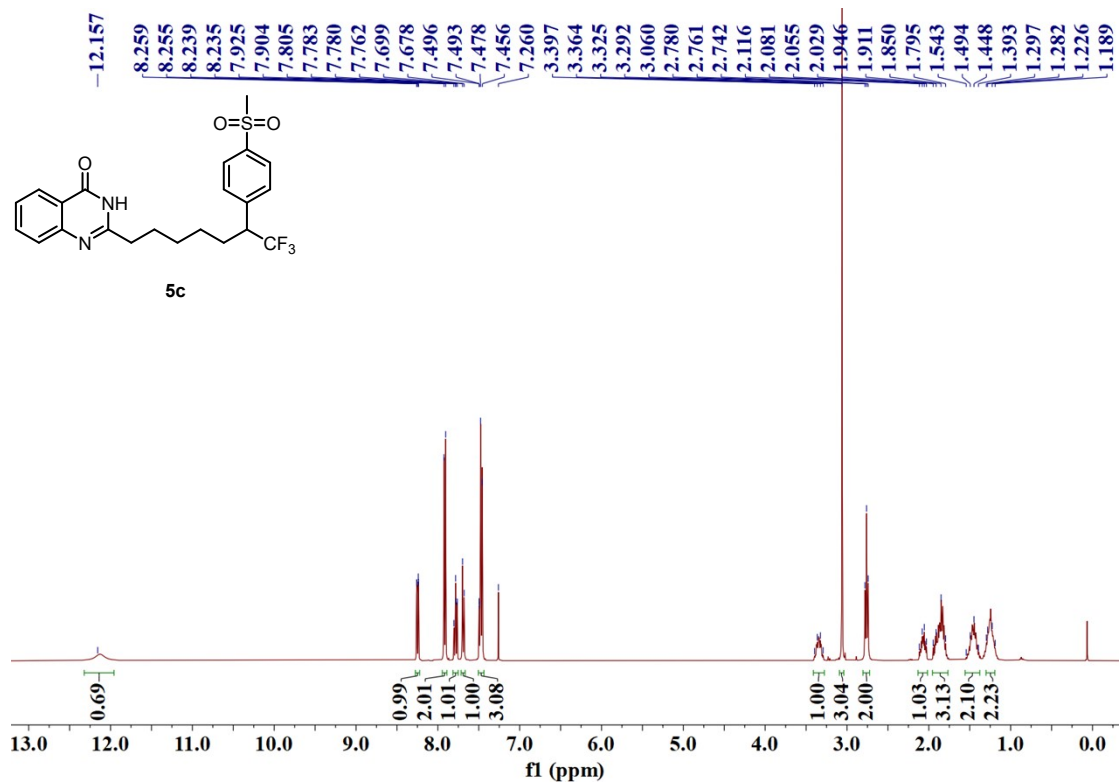

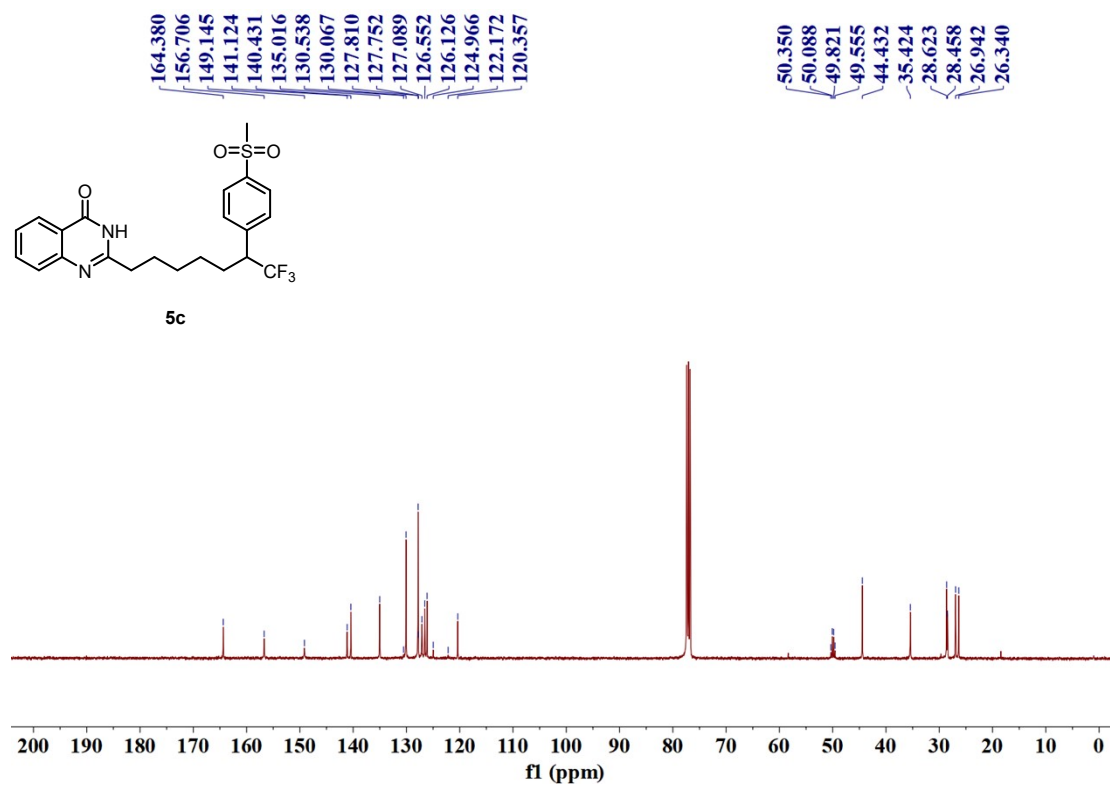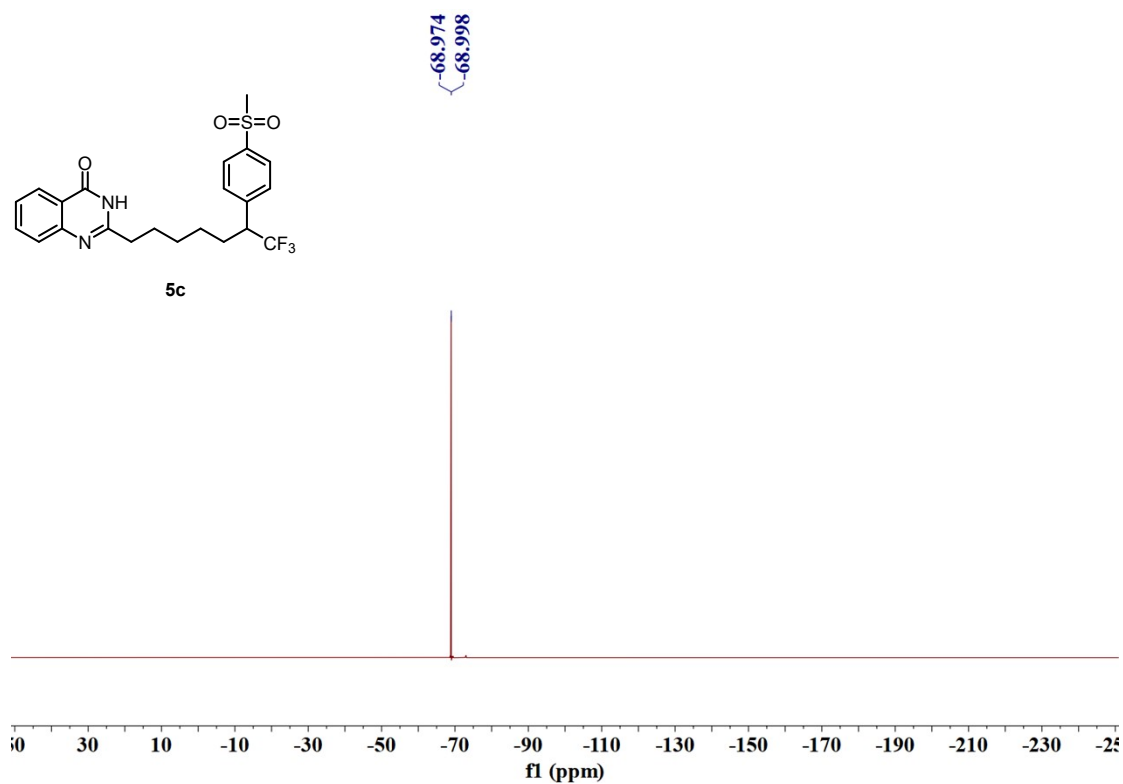

**<sup>1</sup>H NMR, <sup>13</sup>C NMR and <sup>19</sup>F NMR spectra for product 5d (Chloroform-*d*)**

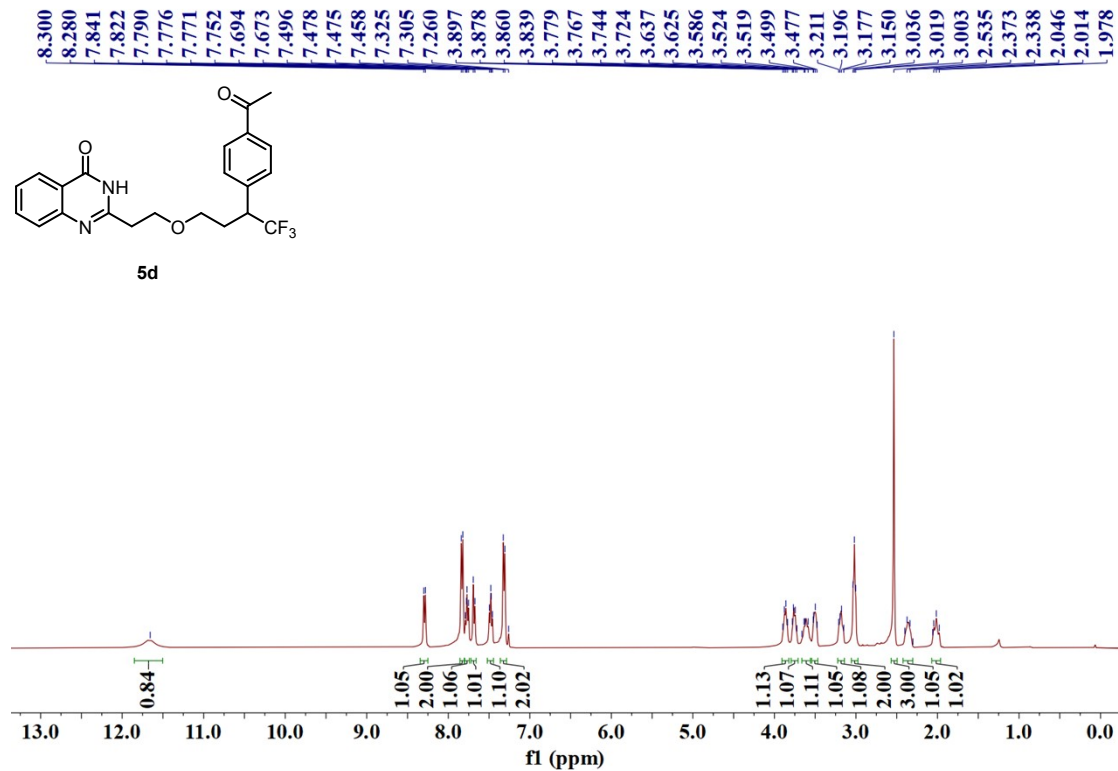

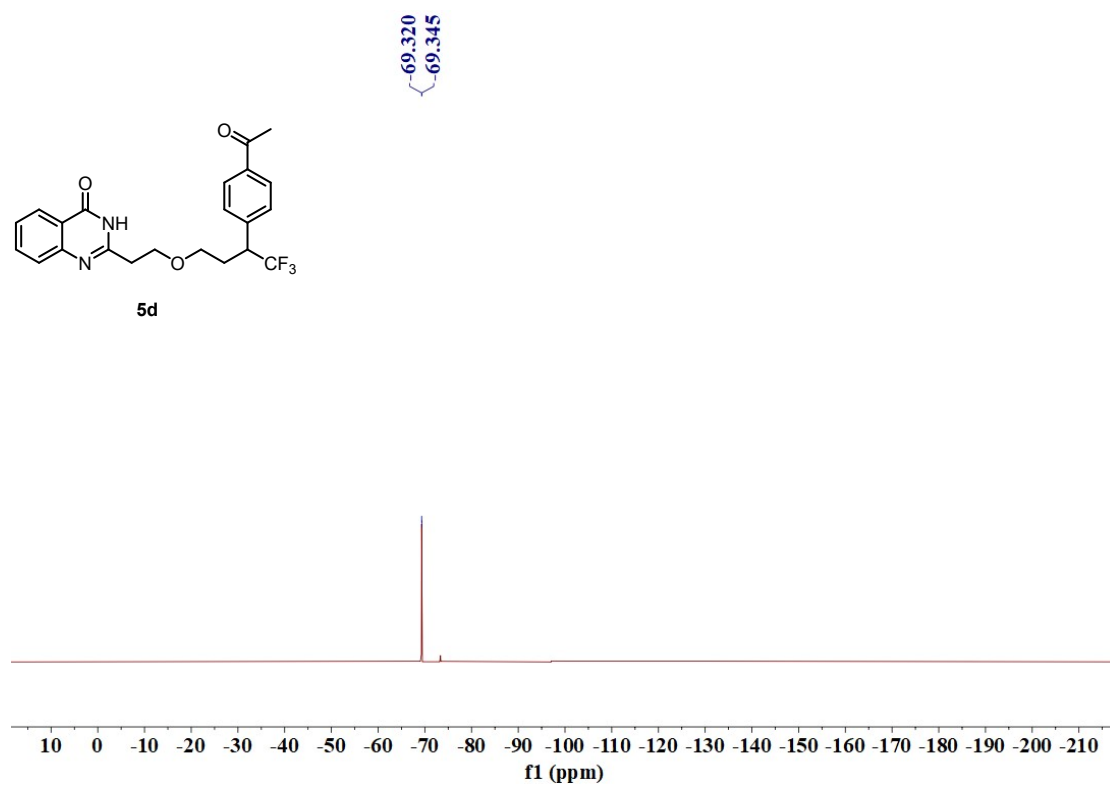

<sup>1</sup>H NMR, <sup>13</sup>C NMR and <sup>19</sup>F NMR spectra for product **5e** (Chloroform-*d*)

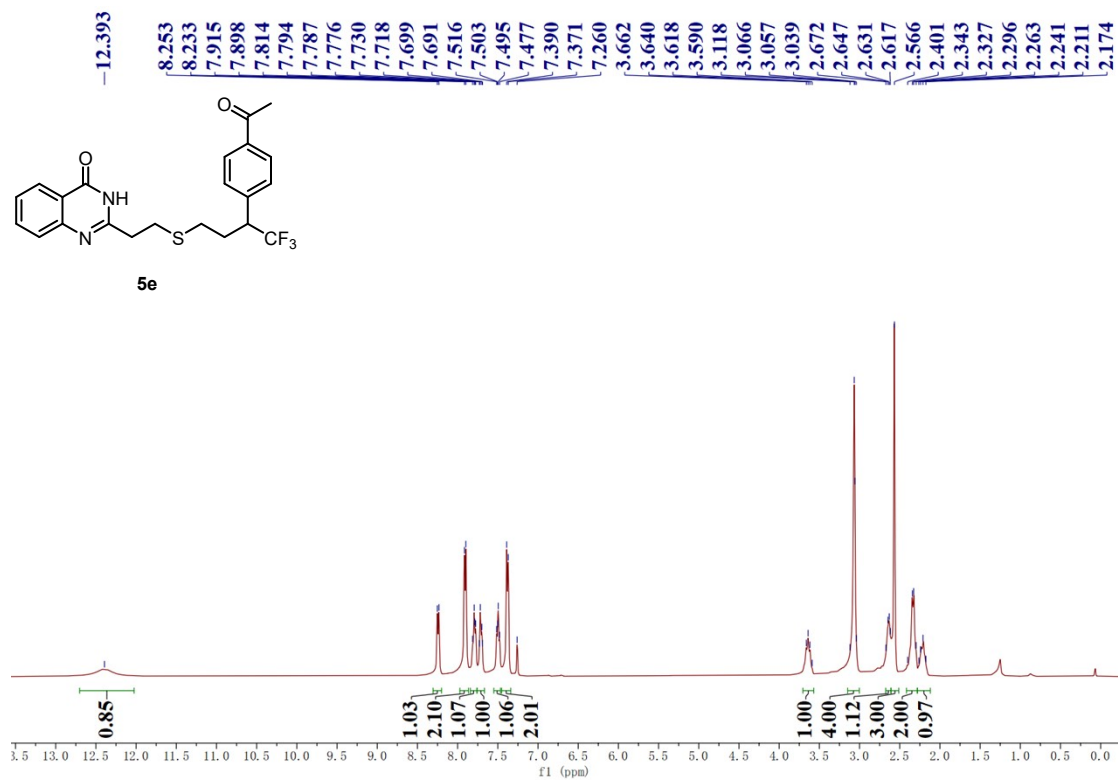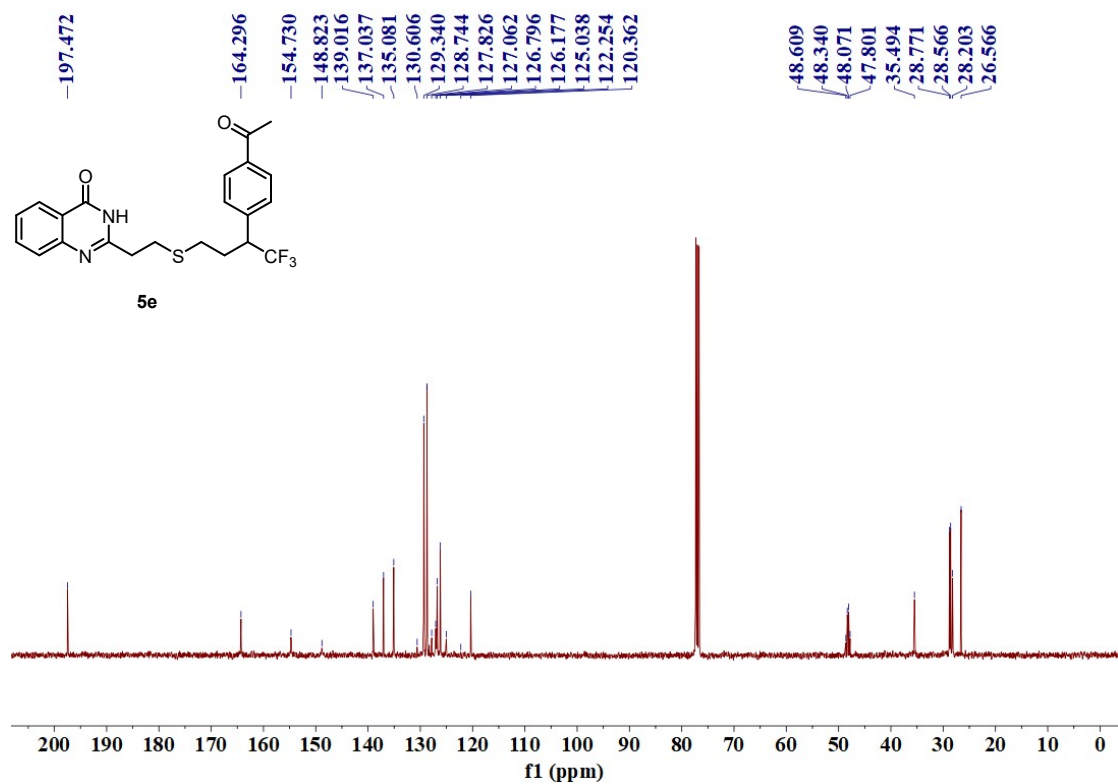

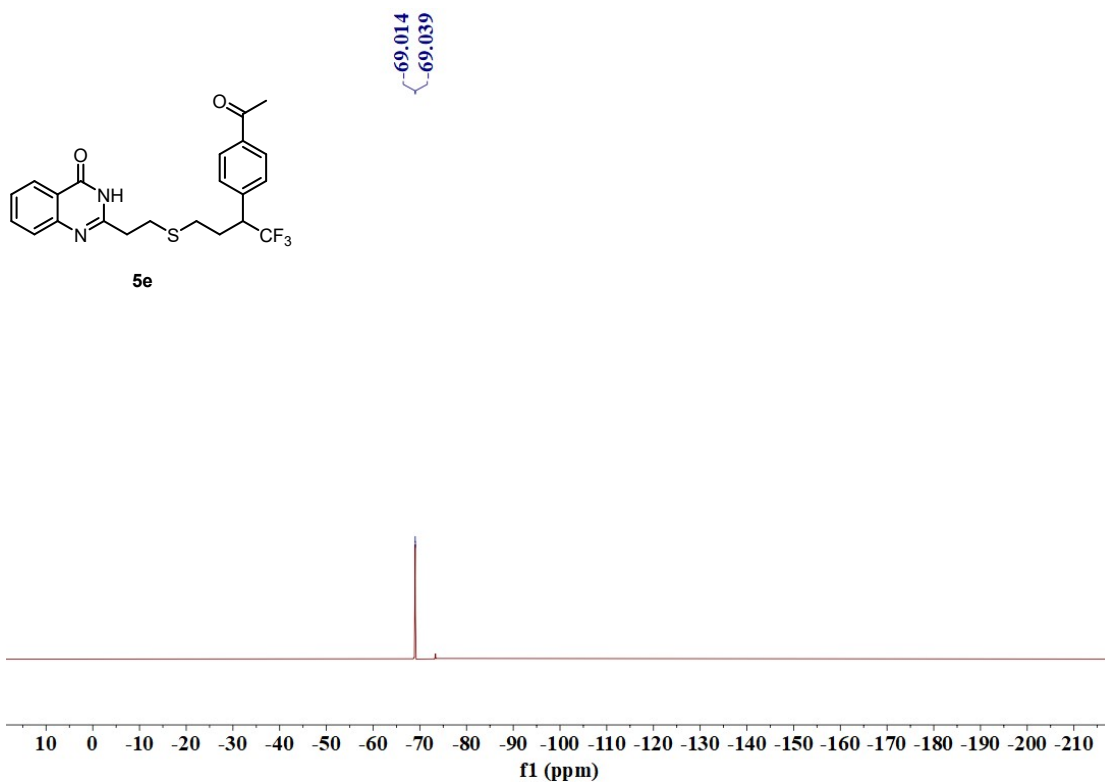

$^1\text{H}$  NMR,  $^{13}\text{C}$  NMR and  $^{19}\text{F}$  NMR spectra for product **5f** (Chloroform-*d*)

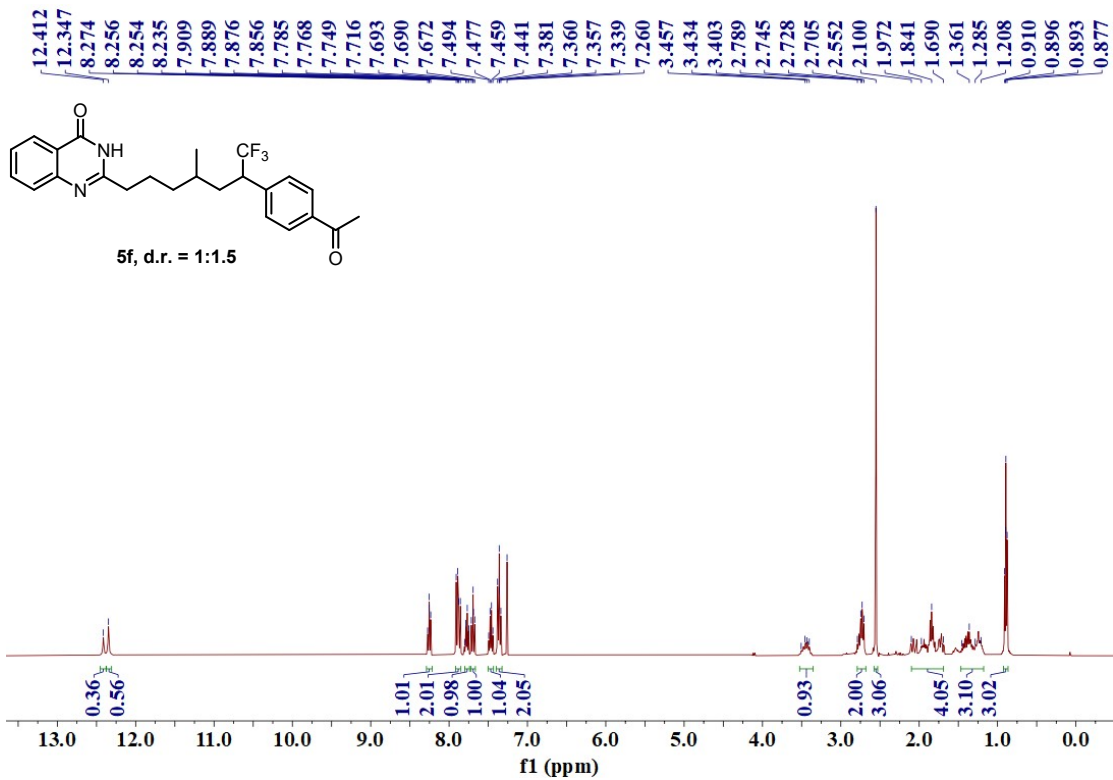



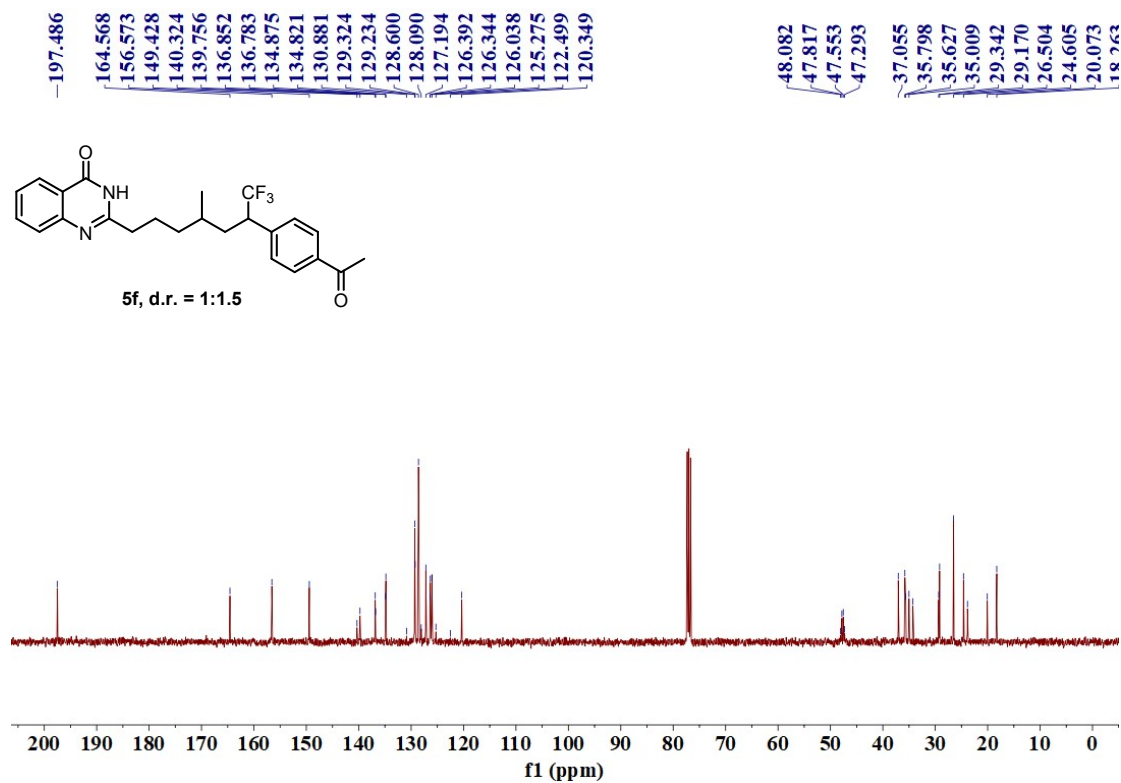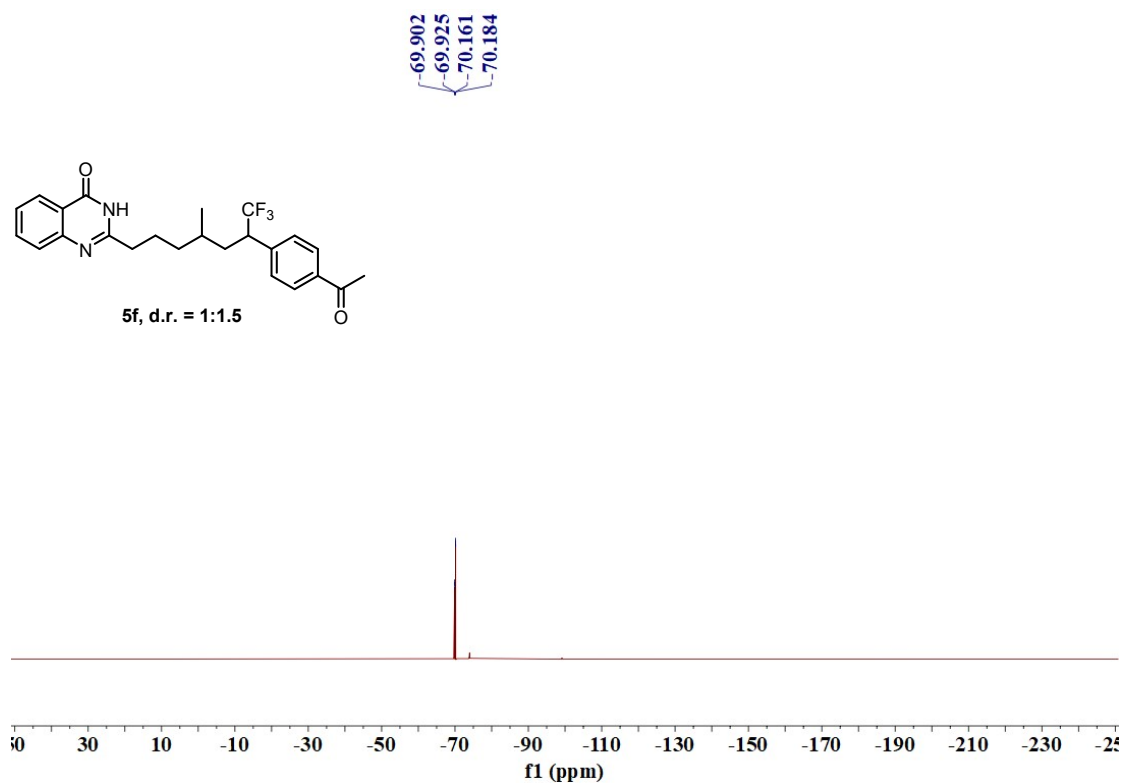

<sup>1</sup>H NMR, <sup>13</sup>C NMR and <sup>19</sup>F NMR spectra for product 5g (Chloroform-*d*)

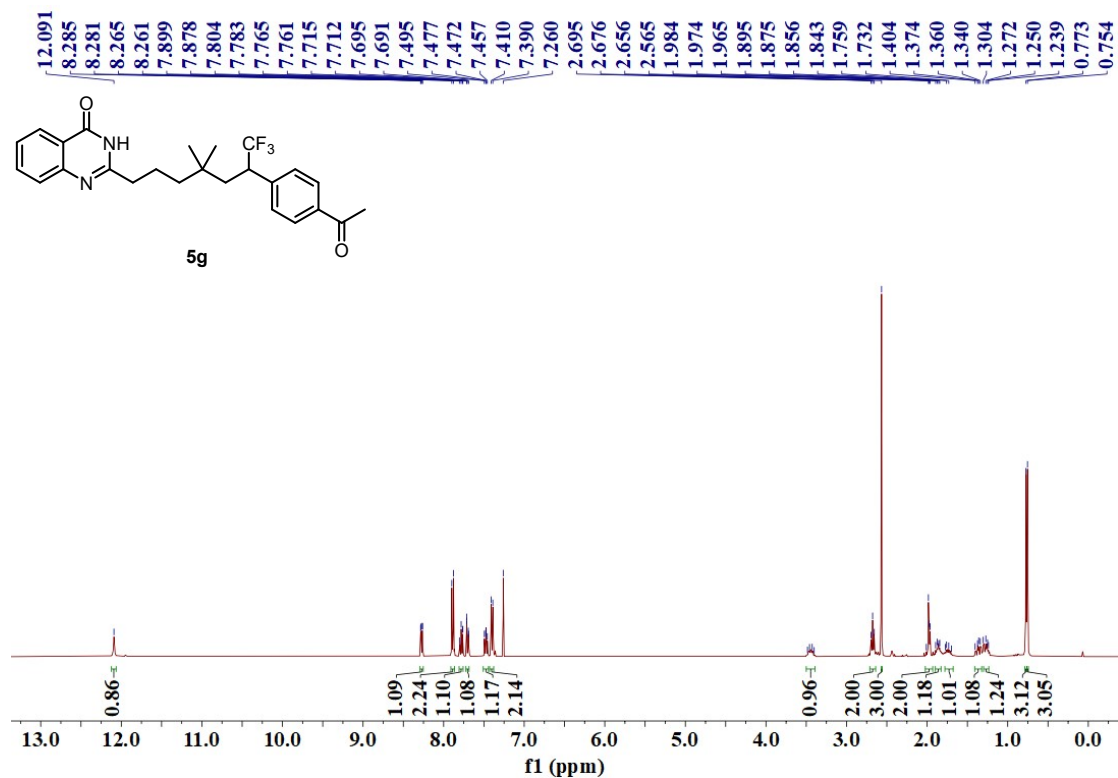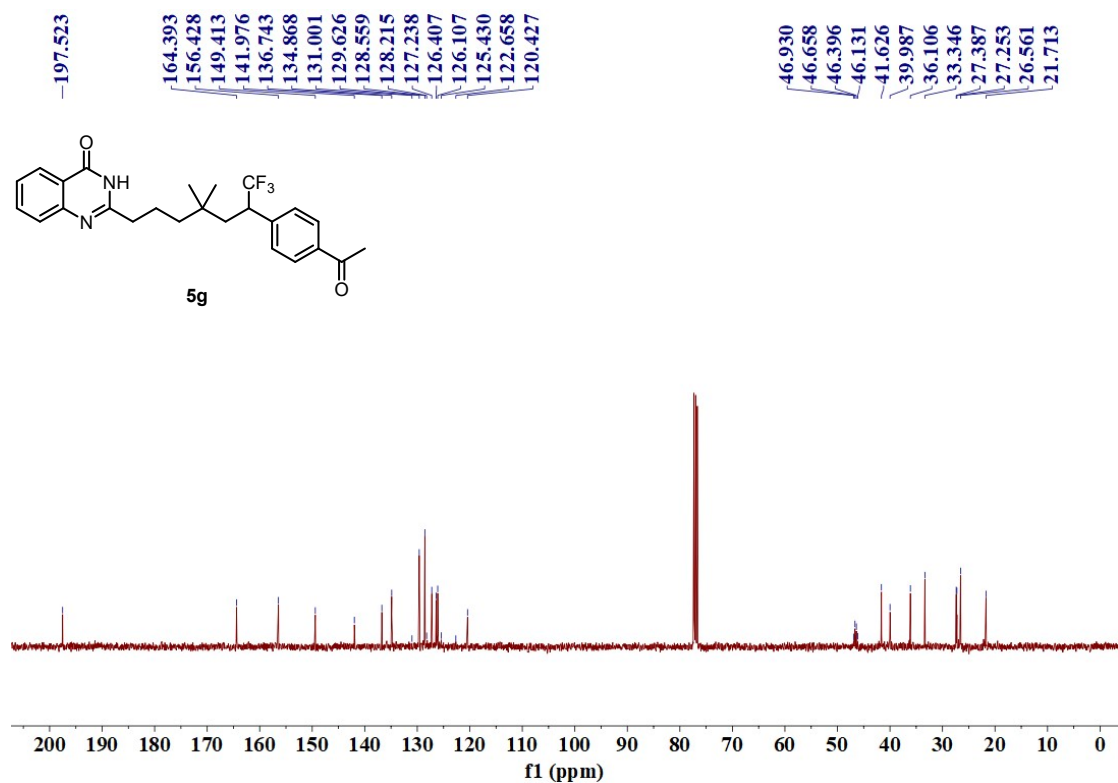

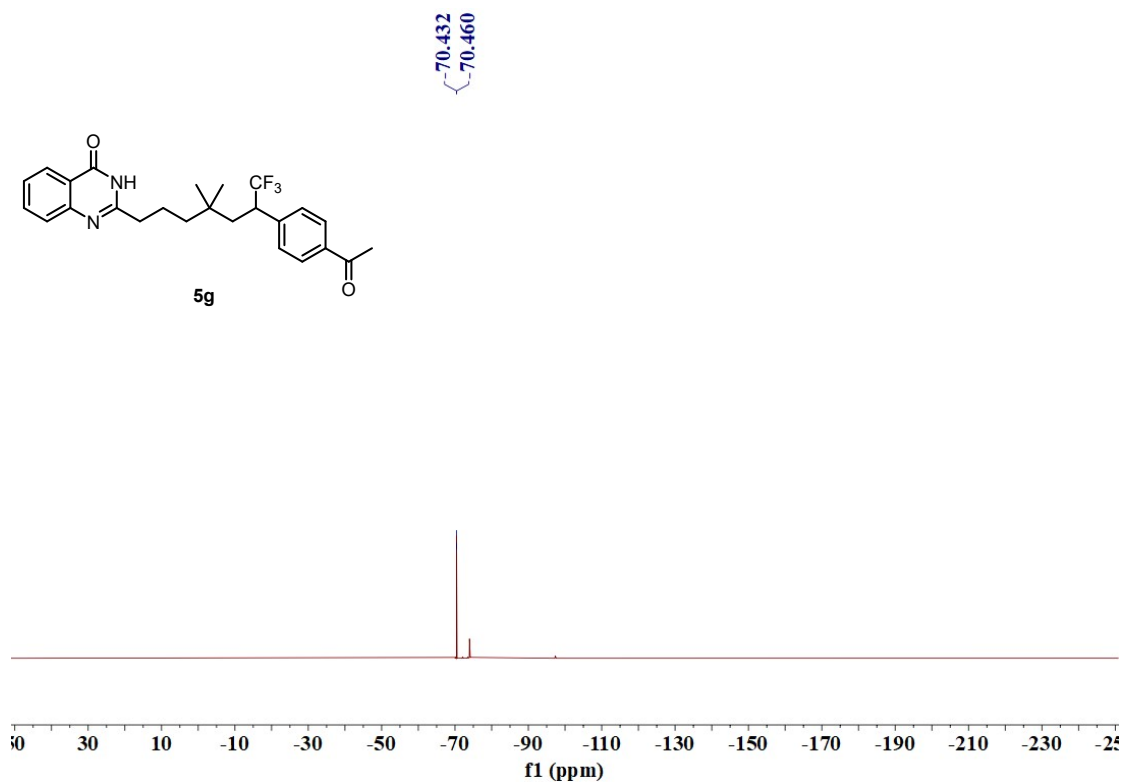

**$^1\text{H}$  NMR,  $^{13}\text{C}$  NMR and  $^{19}\text{F}$  NMR spectra for product 5h (Chloroform-*d*)**

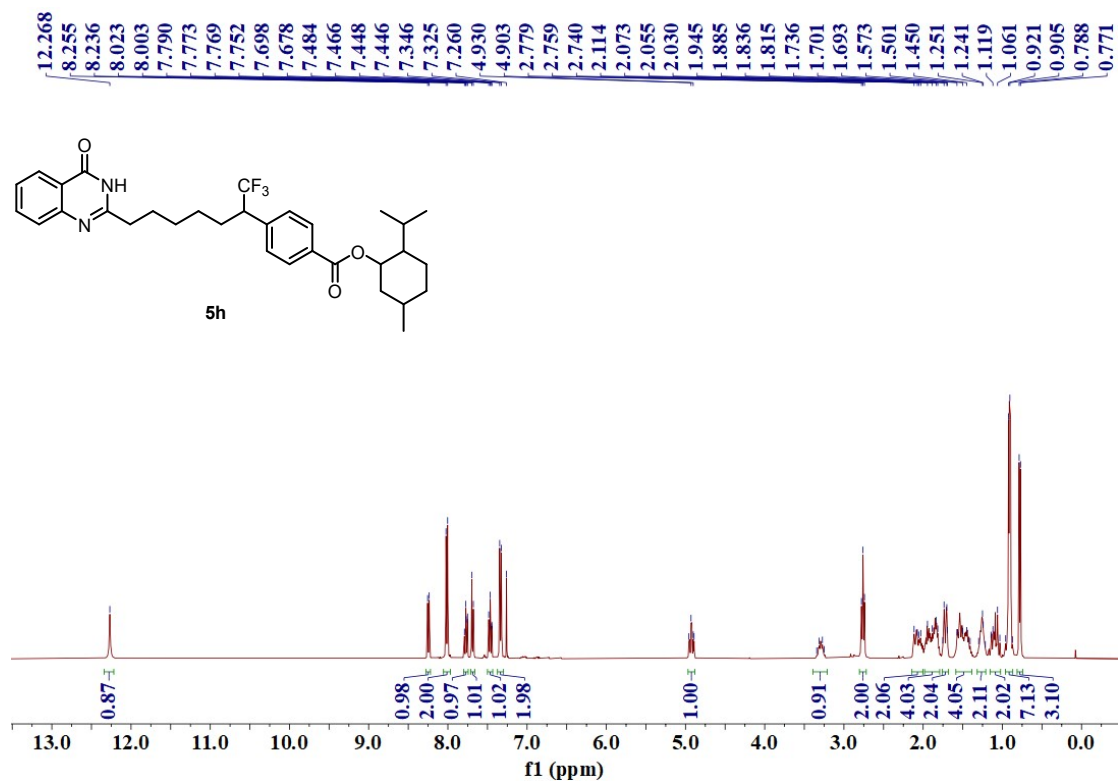

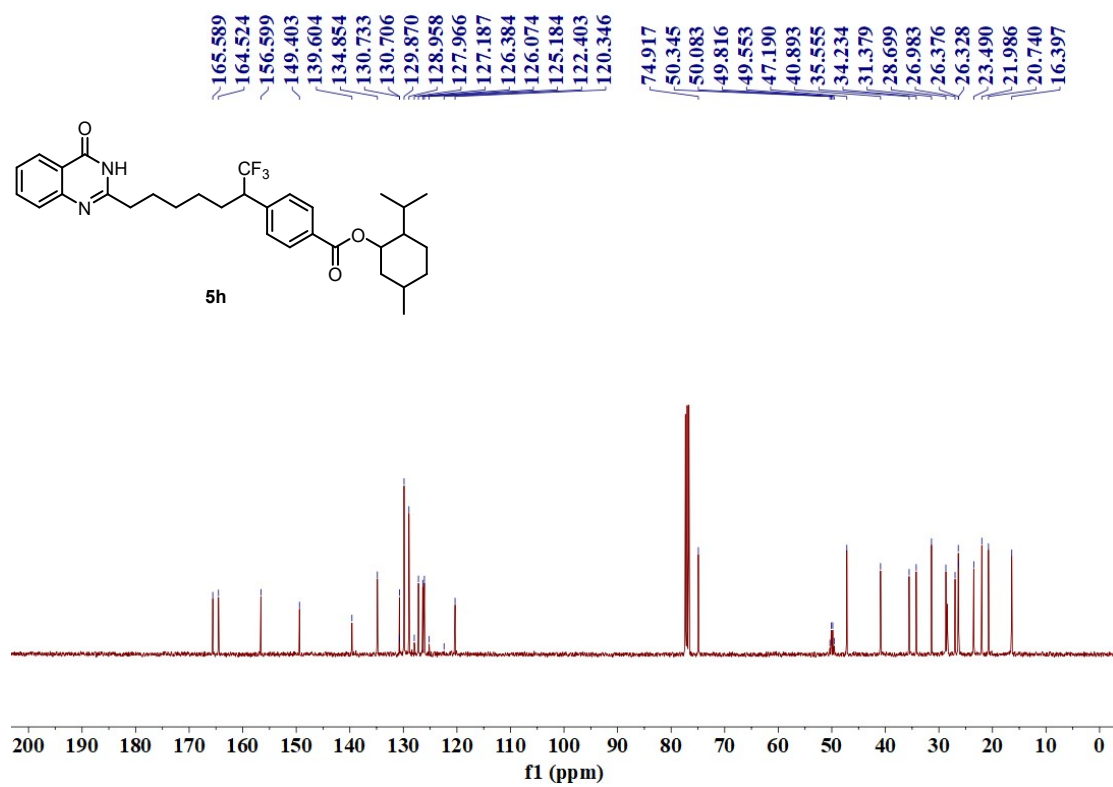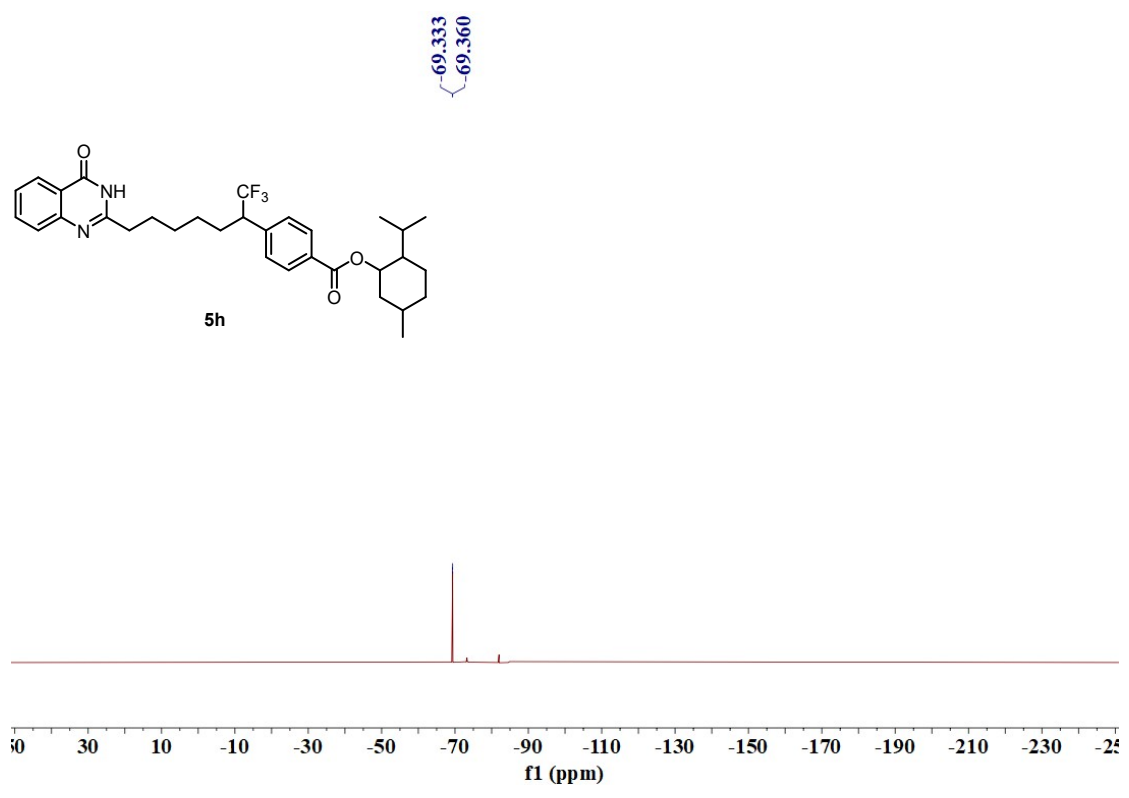

<sup>1</sup>H NMR, <sup>13</sup>C NMR and <sup>19</sup>F NMR spectra for product 5i (Chloroform-*d*)

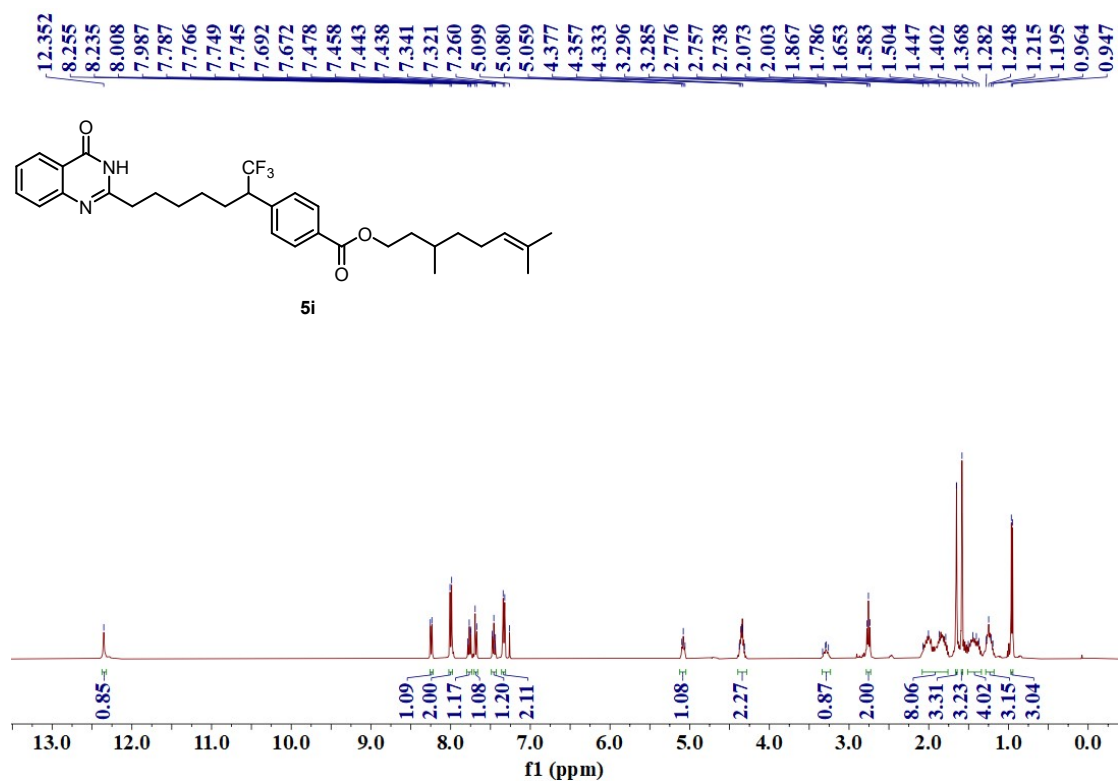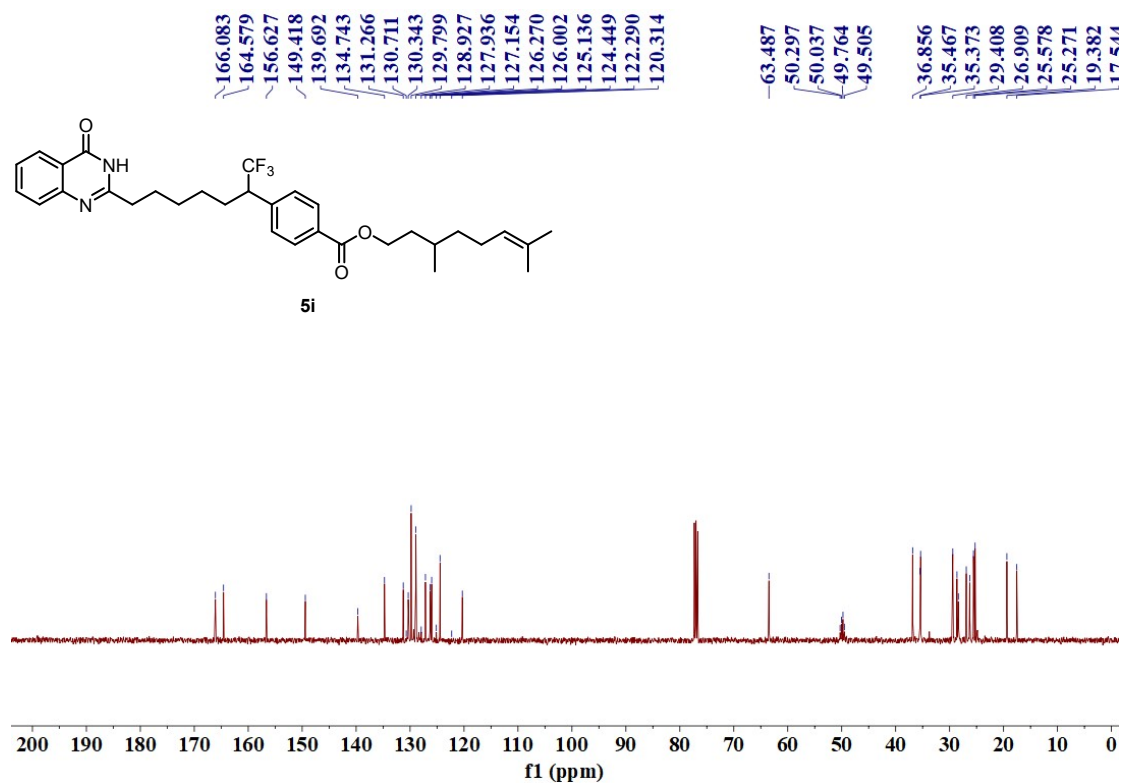

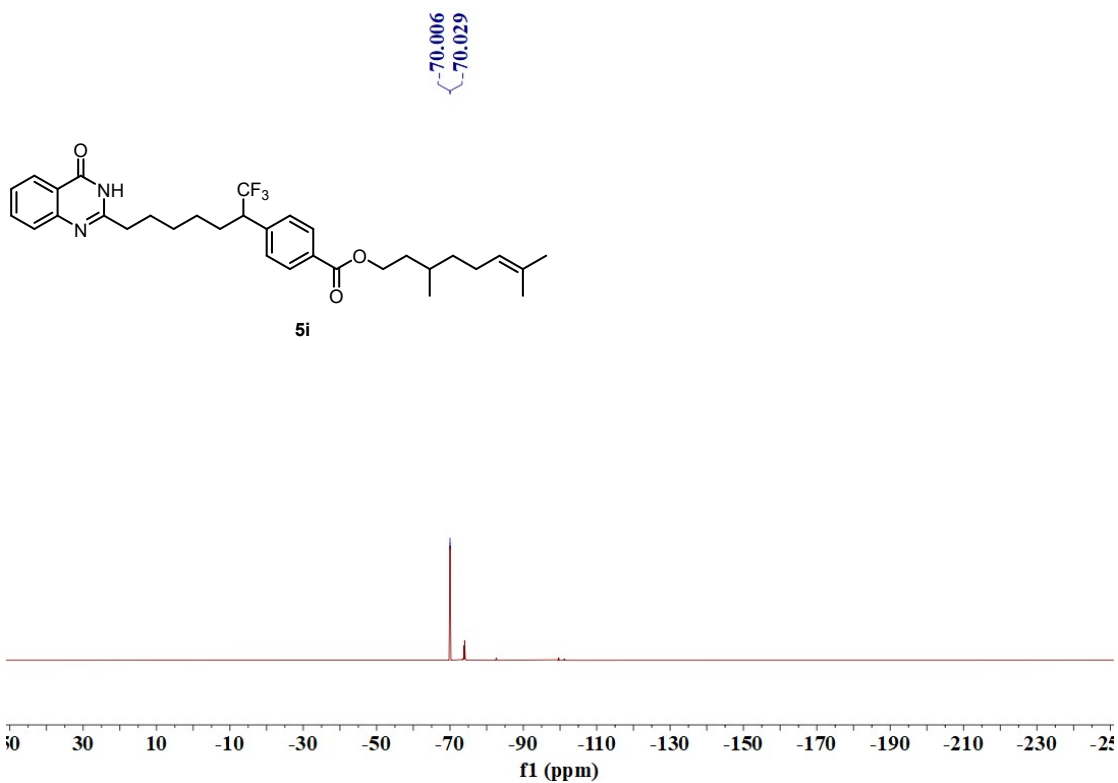

**<sup>1</sup>H NMR, <sup>13</sup>C NMR and <sup>19</sup>F NMR spectra for product 6a (DMSO-*d*<sub>6</sub>)**

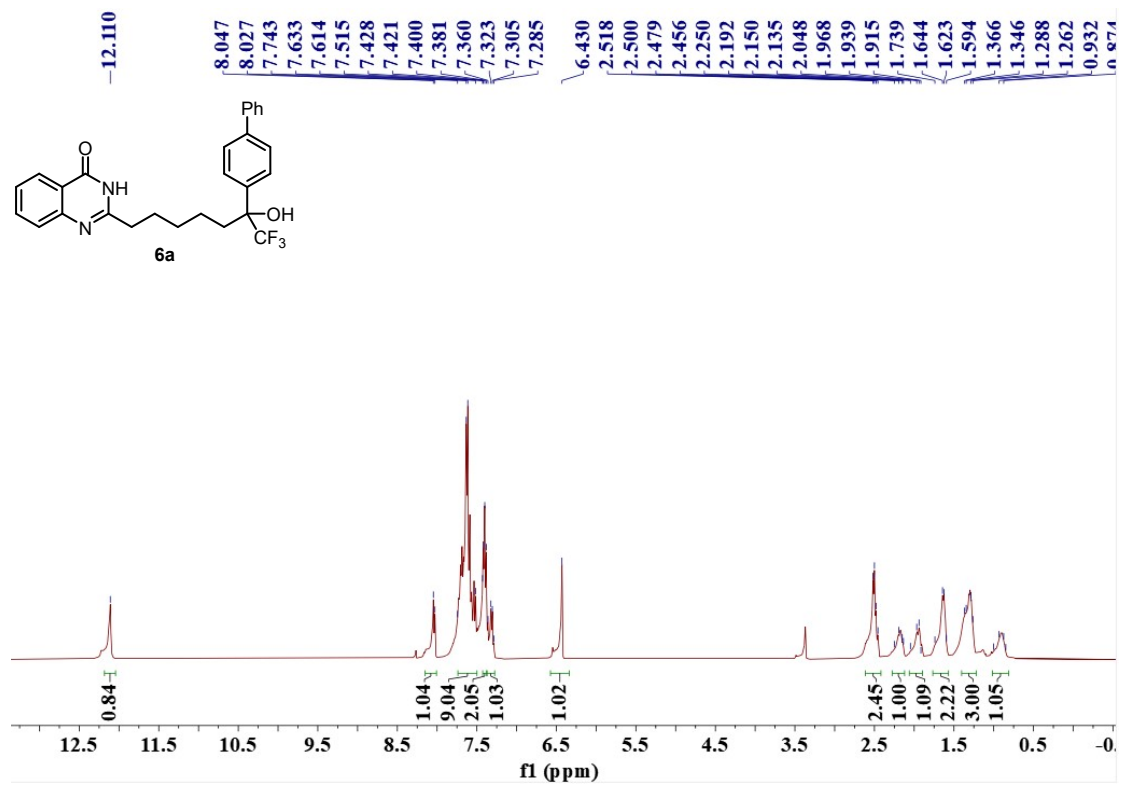

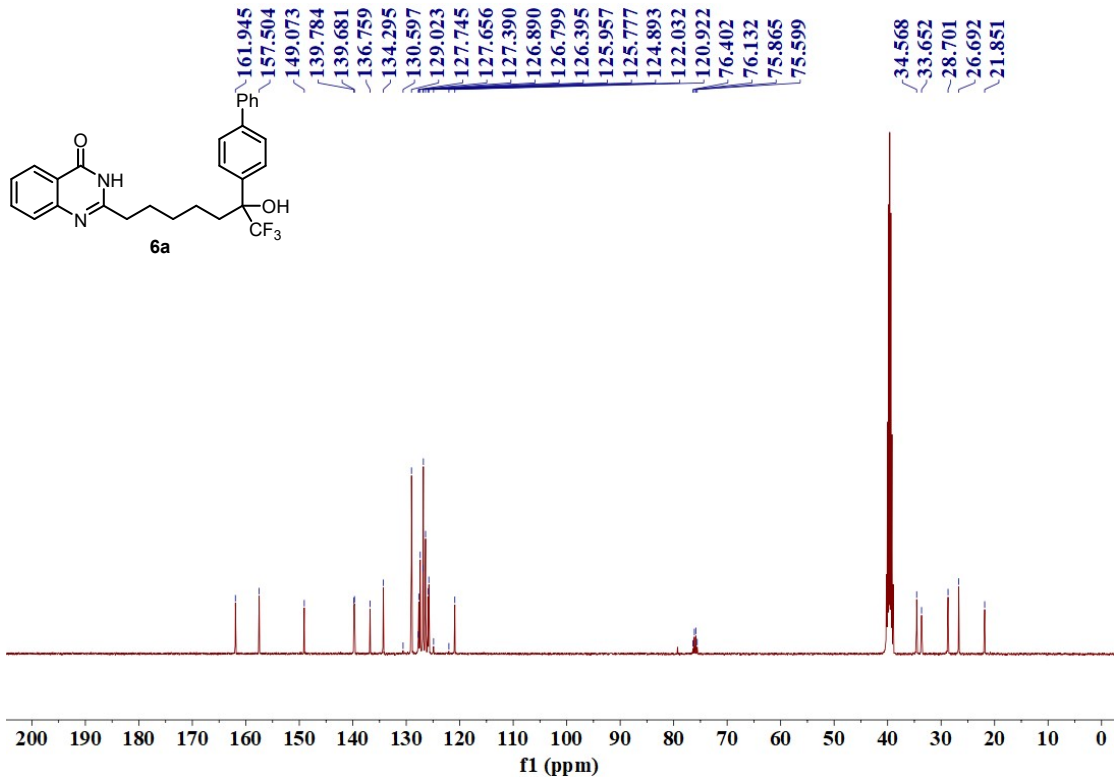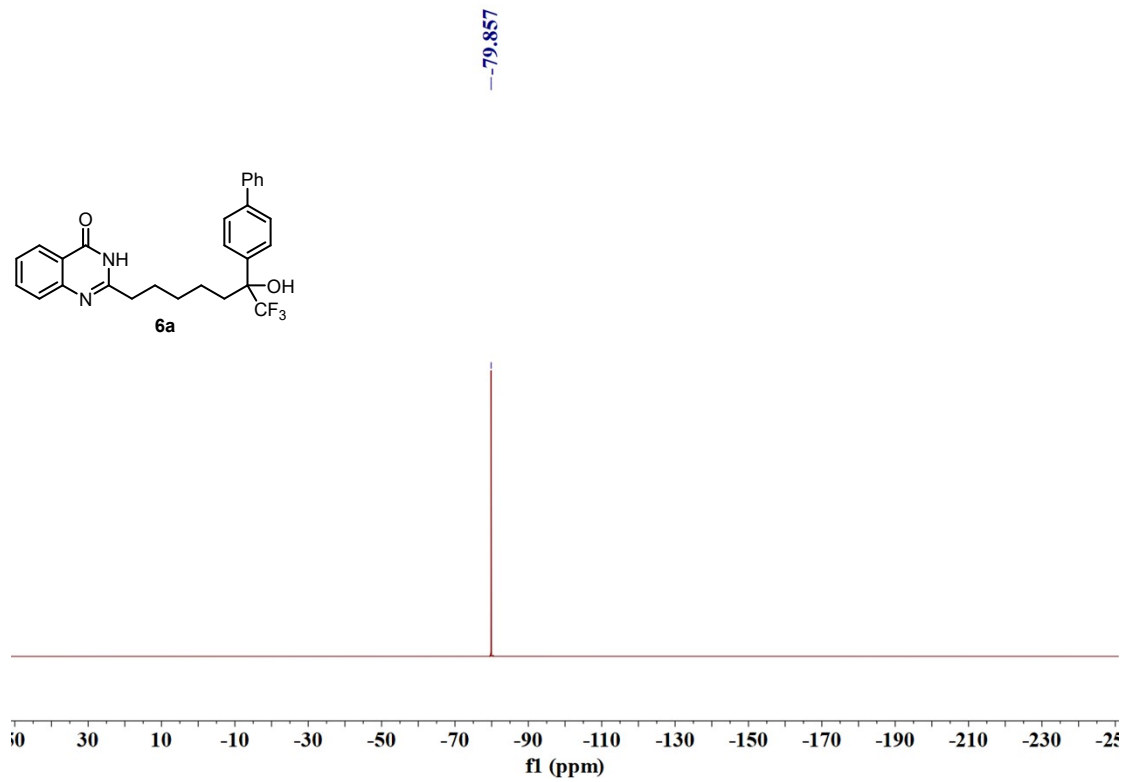

<sup>1</sup>H NMR, <sup>13</sup>C NMR and <sup>19</sup>F NMR spectra for product 6b (Chloroform-d)

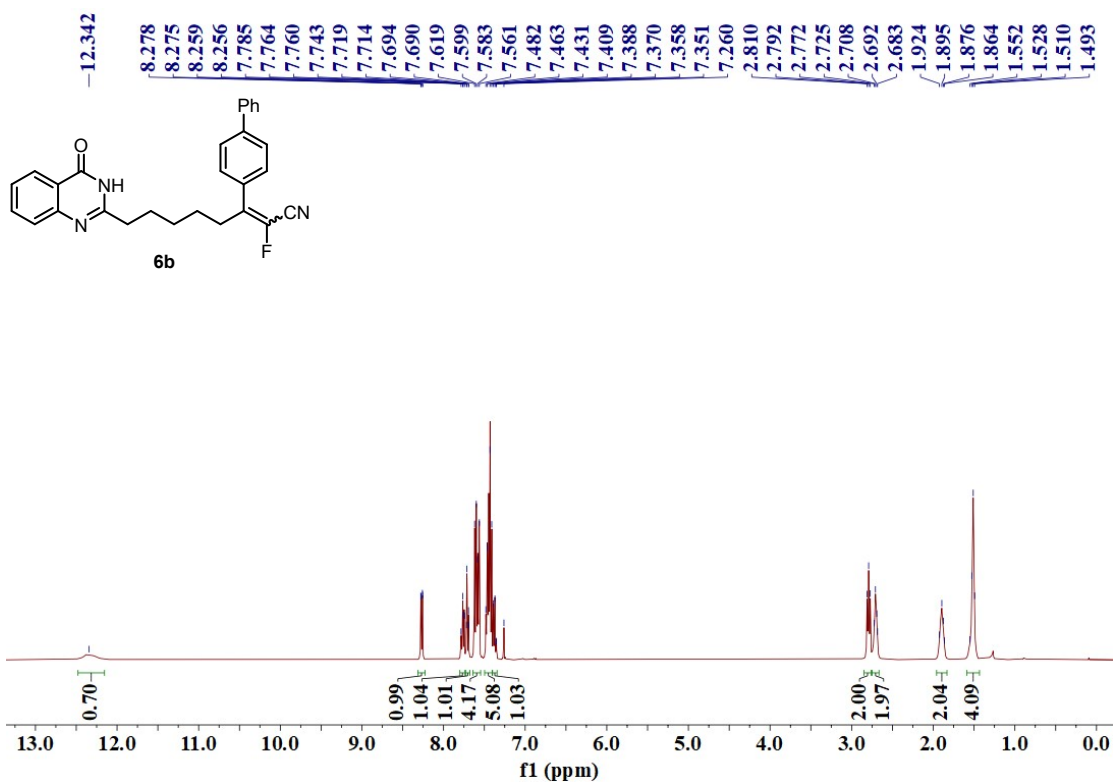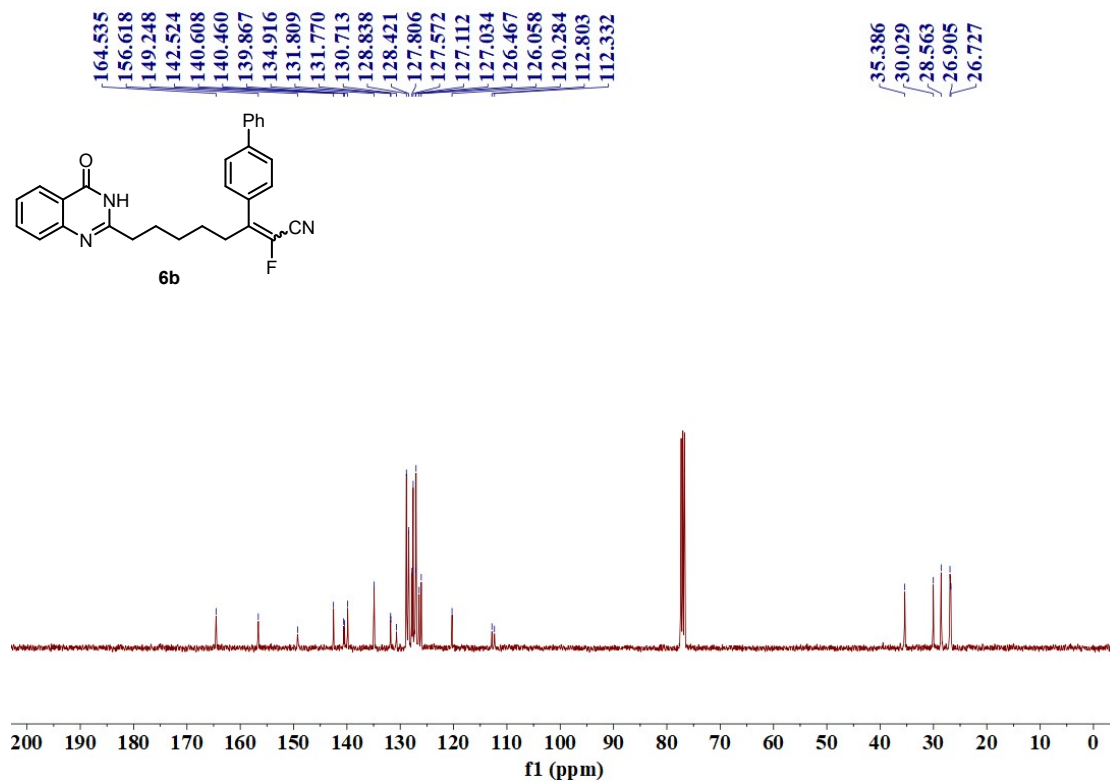



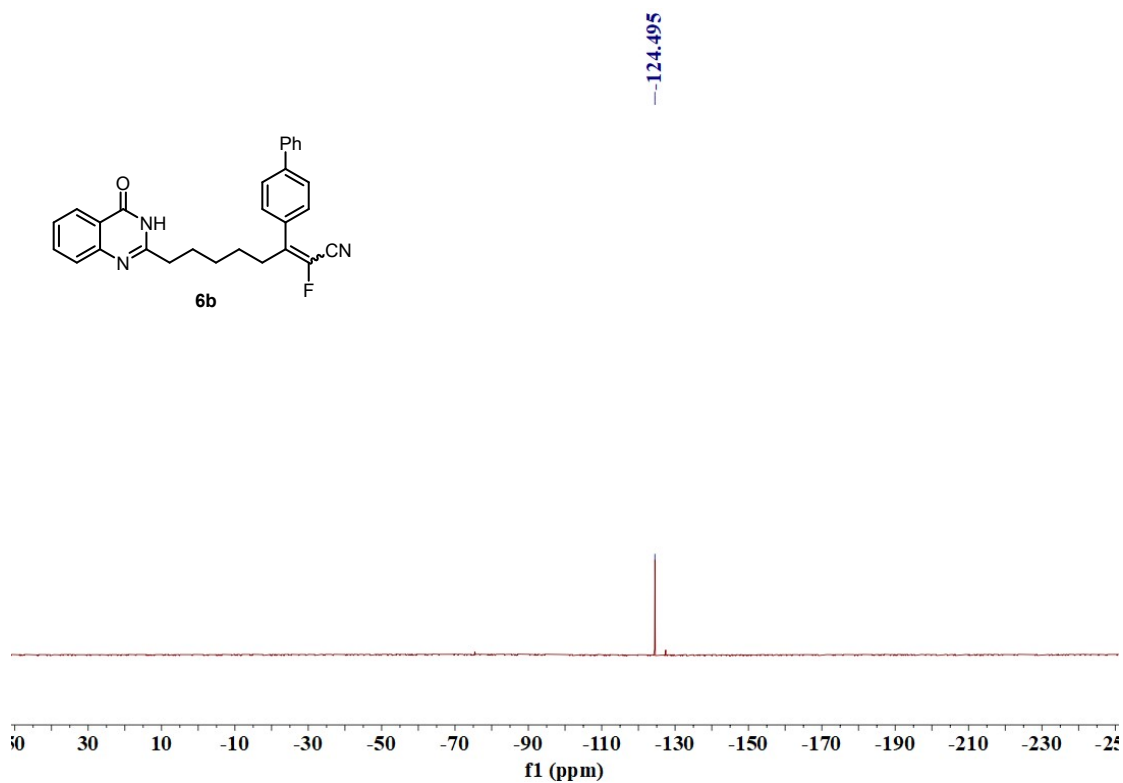

**<sup>1</sup>H NMR, <sup>13</sup>C NMR and <sup>19</sup>F NMR spectra for product 6c (Chloroform-*d*)**

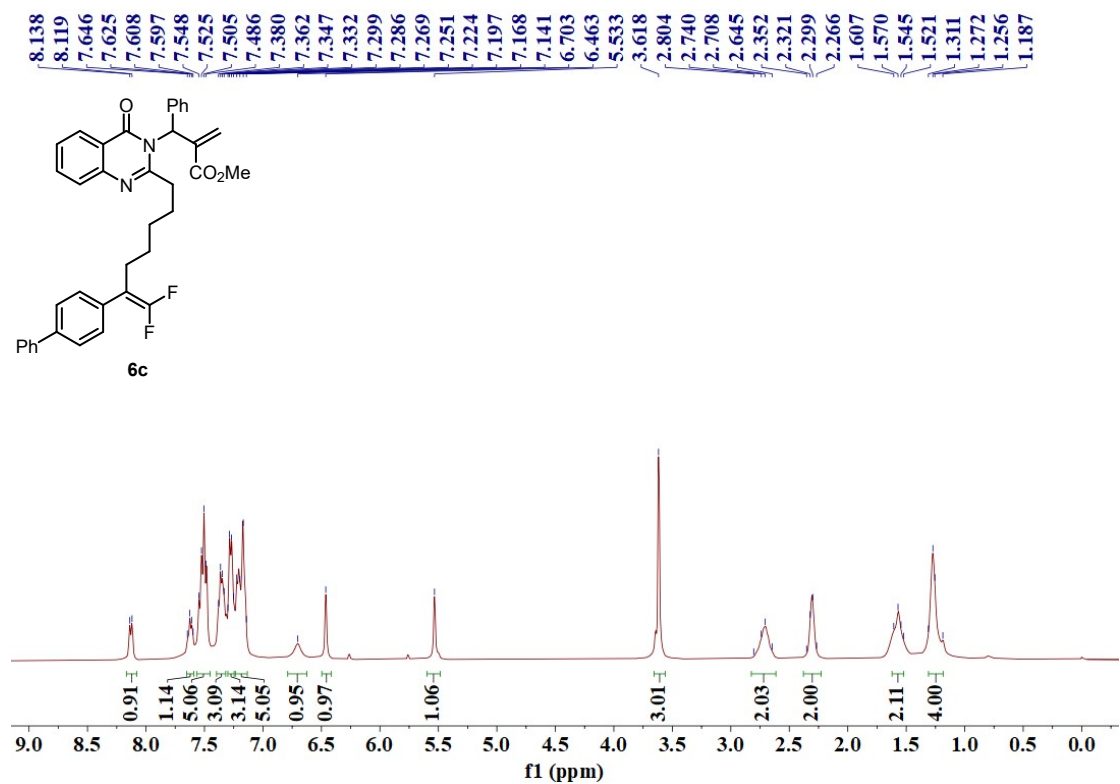

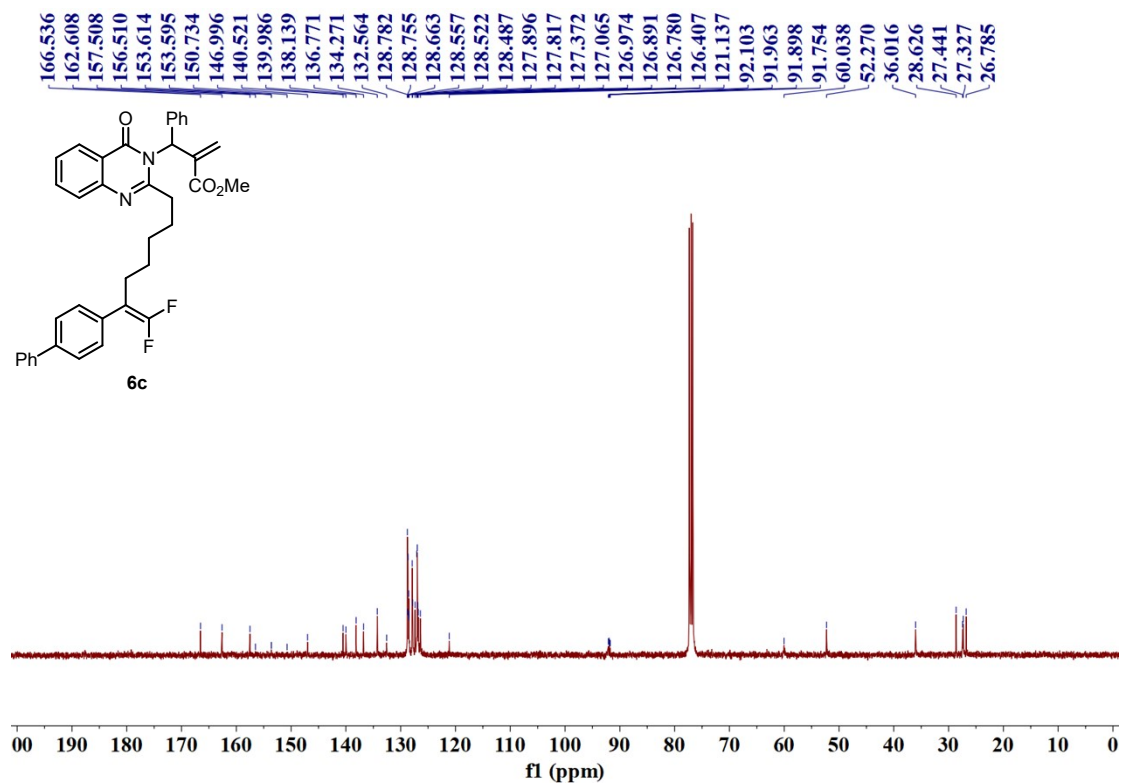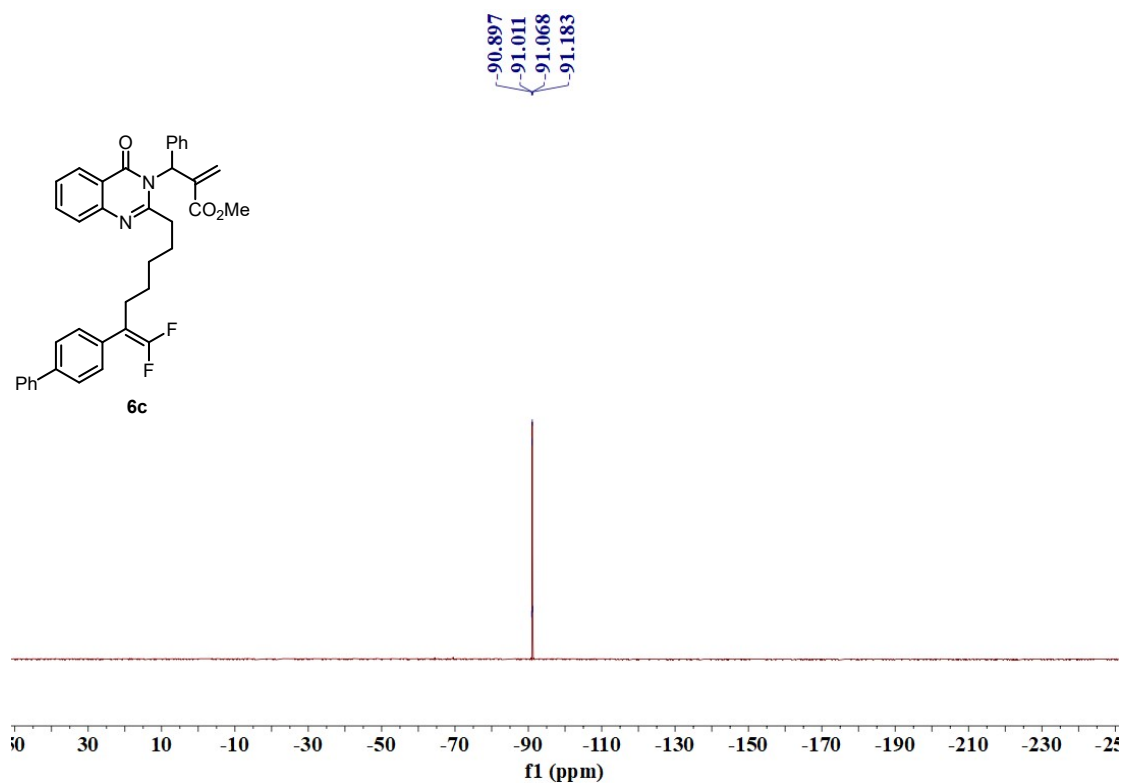

<sup>1</sup>H NMR, <sup>13</sup>C NMR and <sup>19</sup>F NMR spectra for product 6d (Chloroform-*d*)

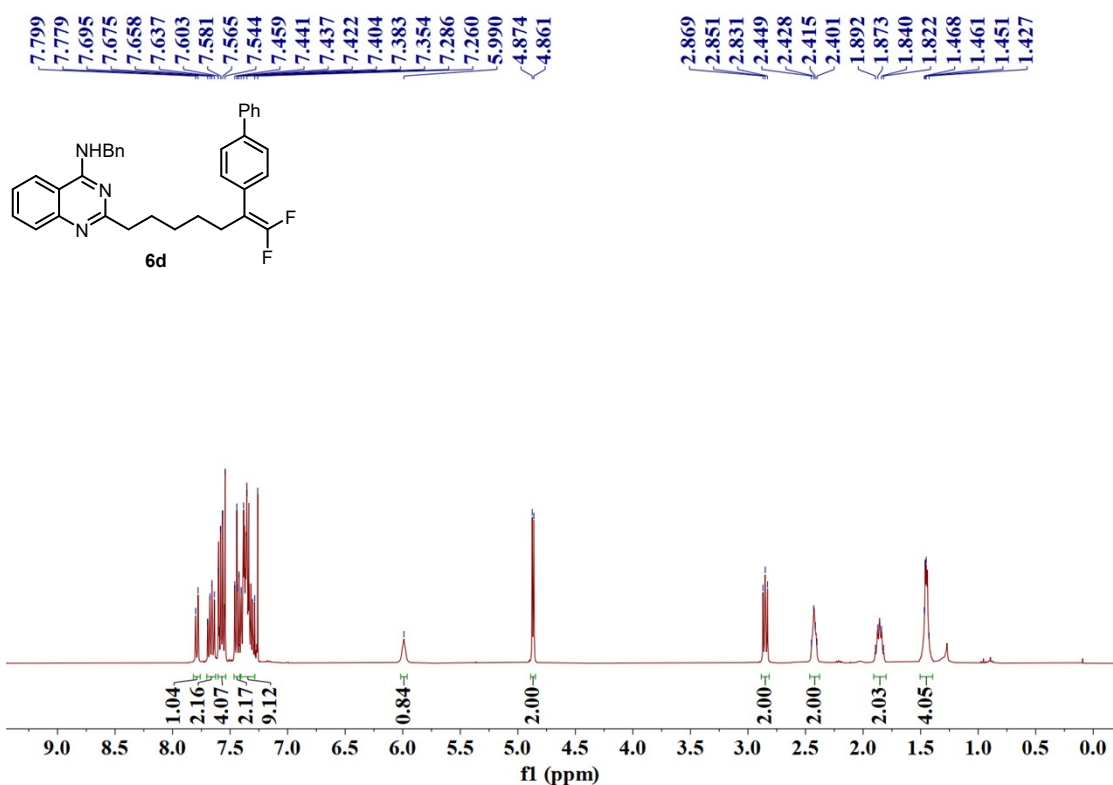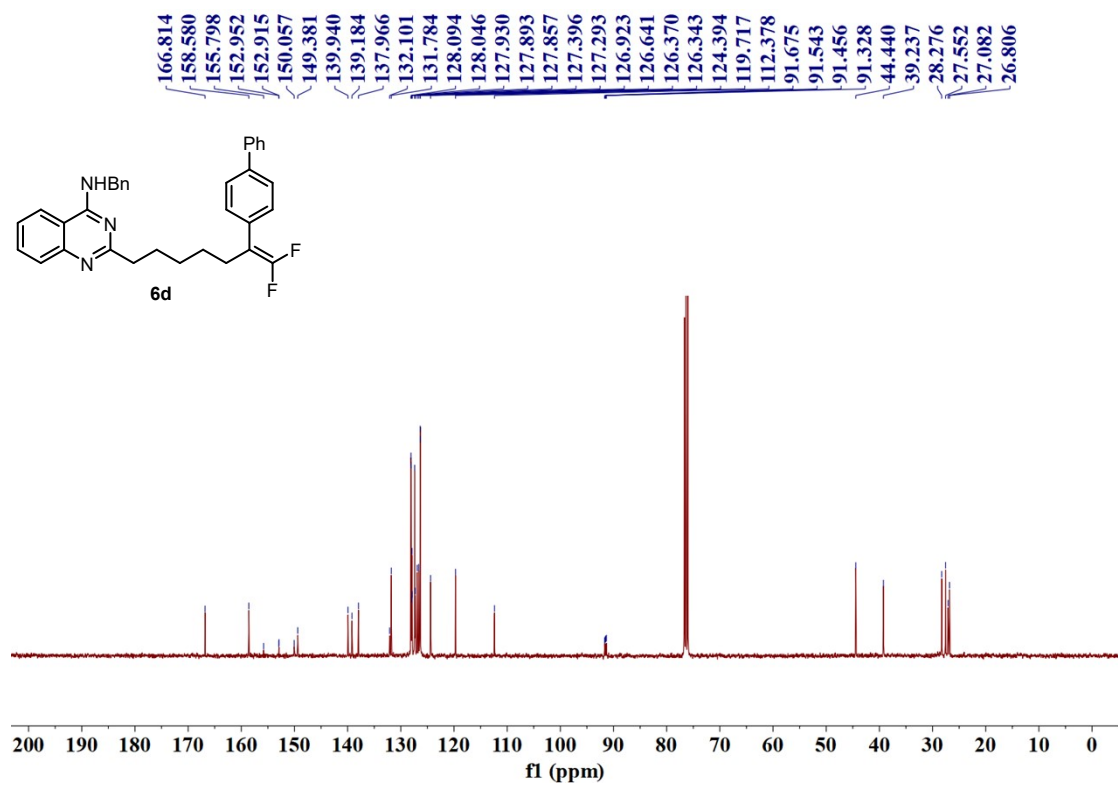

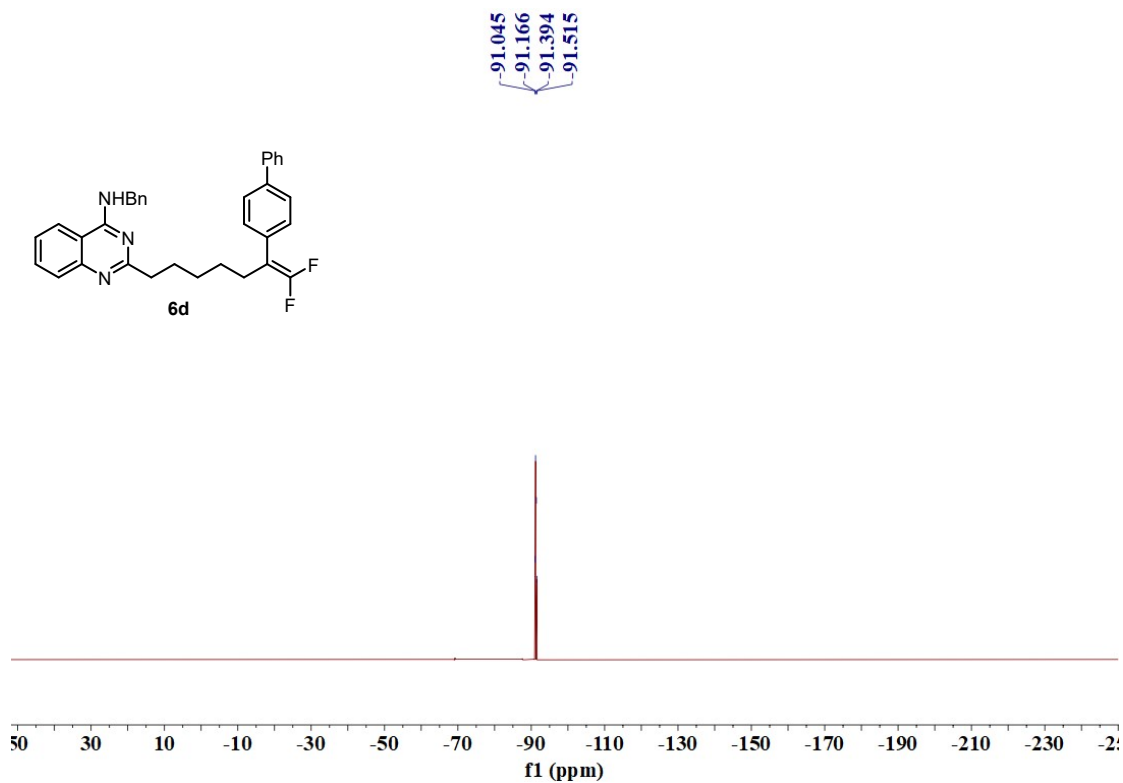

**<sup>1</sup>H NMR, <sup>13</sup>C NMR and <sup>19</sup>F NMR spectra for product 8a (Chloroform-*d*)**

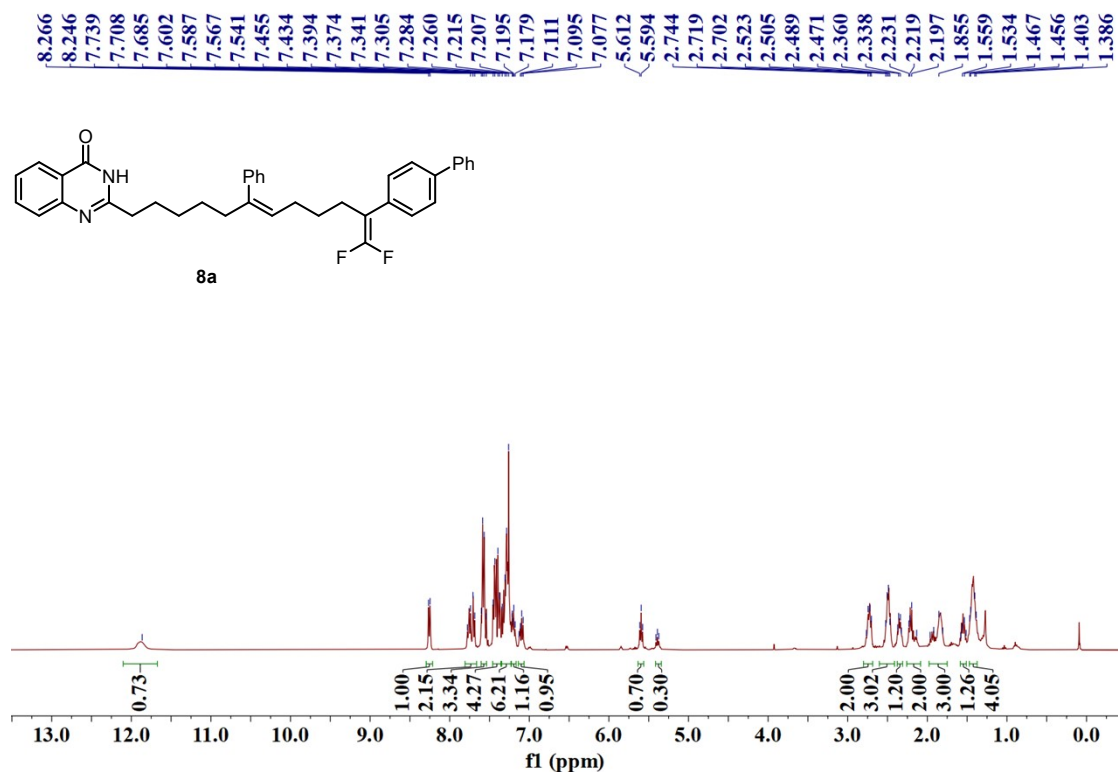

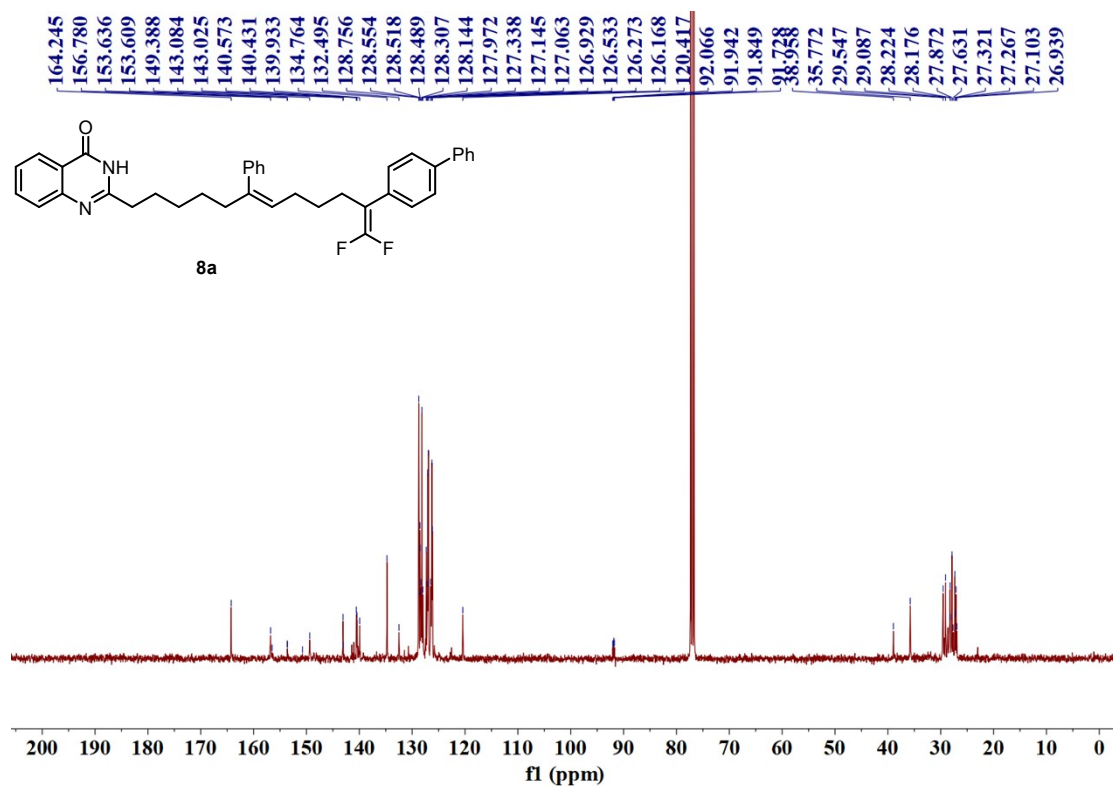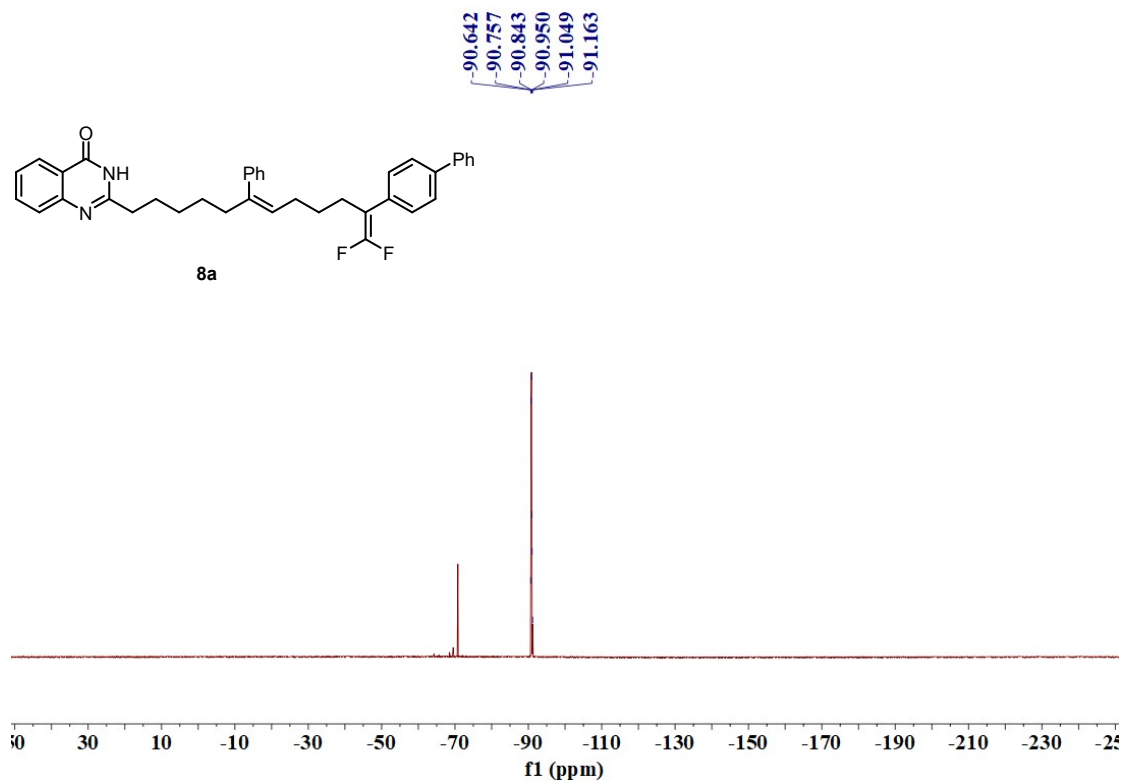

Supplement: d4cc02868f1.pdf [file d4cc02868f1.pdf]
